# Supplementary material for: Characterization of vaginal Lactobacillus in biologically relevant fluid using surface-enhanced Raman spectroscopy
Source: Royal Society of Chemistry journal article supplement (doi:10.1039/d4an00854e), 2024-01-01
Supplement: d4an00854e1.xlsx [file d4an00854e1.xlsx]

## Sheet: L. crispatus
Wavenumber	AuNPs	AuNPs	AuNPs	AuNPs	AuNPs	AuNPs	AuNPs	AuNPs	AuNPs	AuNPs	LC e2	LC e2'	LC e2'	LC e2'	LC e2'	LC e2'	LC e2'	LC e2'	LC e2'	LC e2'	LC e2'	LC e2'	LC e2'	LC e2'	LC e2'	LC e3'	LC e3'	LC e3'	LC e3'	LC e3'	LC e3'	LC e3'	LC e3'	LC e3'	LC e3'	LC e3'	LC e3'	LC e3'	LC e3'	LC e3'	LC e4'	LC e4'	LC e4'	LC e4'	LC e4'	LC e4'	LC e4'	LC e4'	LC e4'
cm\+(-1)
1725.86	1.28105	0.169948	0.321888	0.597023	0.0682212	0.296867	0.184955	0.710627	0.507331	0.128997	0.610913	0.411935	0.564086	0.763411	0.742573	0.543788	0.492179	0.47548	0.784209	0.385455	0.497509	0.650464	0.500465	0.666698	0.68819	0.741393	0.705835	0.682024	0.709537	0.770603	0.565537	0.531125	0.66798	0.55592	0.770598	0.580107	0.579868	0.72548	0.660898	0.64196	0.627119	1.63125	1.31176	0.872414	0.902736	0.871575	0.564826	0.103198	0.701844
1724.89	1.63409	0.536864	0.517668	0.716451	0.492908	0.574822	0.671283	0.856064	0.934229	0.843647	0.634347	0.415483	0.48362	0.716382	0.727641	0.545975	0.632195	0.406236	0.752887	0.463905	0.501537	0.628718	0.431338	0.582106	0.682308	0.712817	0.731073	0.70976	0.705943	0.790503	0.590715	0.607452	0.568496	0.552703	0.680194	0.583884	0.55067	0.693094	0.672681	0.654768	0.714065	1.24345	1.28166	1.03327	0.722941	0.878685	0.780171	0.407565	0.730072
1723.91	1.80219	0.794782	0.638839	0.788471	0.780651	0.755896	0.97213	0.926249	1.19515	1.29029	0.640615	0.42071	0.426235	0.683099	0.710928	0.544101	0.716341	0.367319	0.727097	0.518427	0.505256	0.615386	0.381494	0.527536	0.669274	0.695122	0.748013	0.723408	0.703431	0.799784	0.600657	0.655012	0.526937	0.557328	0.618463	0.580792	0.5279	0.671915	0.675976	0.657298	0.761299	0.943189	1.25178	1.08956	0.608967	0.837876	0.930905	0.672028	0.751366
1722.94	1.78535	0.943703	0.685401	0.813082	0.931455	0.840091	1.0875	0.921184	1.2901	1.46893	0.629717	0.427613	0.39193	0.663561	0.692435	0.538164	0.744617	0.35873	0.706842	0.549021	0.508667	0.610466	0.350935	0.502985	0.649086	0.688309	0.756656	0.722968	0.702002	0.798445	0.595362	0.673804	0.543302	0.569795	0.585406	0.570829	0.511558	0.661944	0.670782	0.649549	0.768823	0.730464	1.22212	1.04129	0.560815	0.749148	1.01703	0.896591	0.765723
1721.96	1.88014	1.02052	0.721033	0.946373	0.89566	0.871686	0.960105	0.836522	1.23928	1.23212	0.578704	0.441067	0.394626	0.663913	0.665549	0.533752	0.674179	0.428283	0.692809	0.548008	0.496939	0.65514	0.385642	0.53008	0.623455	0.695515	0.7742	0.694161	0.715951	0.79851	0.586995	0.639252	0.735662	0.608034	0.580564	0.554373	0.505993	0.676872	0.647187	0.600552	0.6608	0.616391	1.12791	0.836036	0.727362	0.691737	1.08298	1.08012	0.791773
1720.98	0.965033	1.01919	0.600624	0.839639	0.917702	0.706735	0.79114	0.745876	0.984245	1.04742	0.500098	0.429169	0.381188	0.6575	0.677705	0.526284	0.631588	0.441473	0.681967	0.536673	0.510408	0.624244	0.304464	0.519259	0.554068	0.69512	0.735799	0.655394	0.655501	0.75081	0.561511	0.577873	0.737297	0.593209	0.618304	0.521685	0.496236	0.672357	0.634479	0.572689	0.476077	0.646296	1.10255	0.559671	0.738746	0.445863	0.897813	0.936914	0.745915
1720.01	0.218074	0.579141	0.215911	0.539277	0.564665	0.370415	0.430478	0.488237	0.514587	0.60927	0.486992	0.409424	0.369447	0.614083	0.612706	0.381572	0.574656	0.432153	0.614838	0.47256	0.548004	0.494606	0.272961	0.526981	0.532617	0.664775	0.699548	0.633814	0.645629	0.725917	0.484557	0.551573	0.693534	0.541688	0.646649	0.495582	0.490876	0.656445	0.622539	0.552808	0.479367	0.667264	1.11336	0.482367	0.598288	0.352112	0.83273	1.01403	0.502051
1719.03	0.103439	0.39908	0.192387	0.271967	0.424844	0.215049	0.170945	0.601578	0.300449	0.418525	0.582956	0.405509	0.374913	0.621439	0.592092	0.439562	0.55956	0.424223	0.611588	0.390586	0.553158	0.525124	0.339607	0.513346	0.586318	0.675206	0.696511	0.649579	0.661156	0.725308	0.445782	0.560055	0.658179	0.528139	0.642138	0.494087	0.45829	0.623593	0.593608	0.572635	0.496596	0.715156	1.4324	0.616969	0.720026	0.263172	0.916422	0.948413	0.269915
1718.06	0.54381	0.351895	0.151709	0.101093	0.237329	0.125037	0.106723	0.498728	0.048482	0.198218	0.604864	0.346094	0.456684	0.666546	0.627734	0.505013	0.620541	0.384266	0.653618	0.357112	0.593184	0.503743	0.321465	0.510672	0.629877	0.663289	0.696187	0.659792	0.649774	0.711452	0.443014	0.570581	0.61779	0.488454	0.588511	0.486087	0.416219	0.598643	0.5756	0.579182	0.469823	0.736945	1.43372	0.534253	0.766207	0.197591	0.976439	0.809331	0.239156
1717.08	1.30203	0.365255	0.252329	0.139549	0.18543	0.193003	0.285646	0.468139	0.234275	0.199384	0.668792	0.295387	0.466326	0.630431	0.614363	0.474578	0.582454	0.384177	0.648416	0.39844	0.505475	0.423478	0.384764	0.461959	0.640128	0.634691	0.690755	0.63321	0.605704	0.687426	0.467223	0.572705	0.608775	0.432376	0.502417	0.493529	0.395308	0.564083	0.539834	0.537834	0.343339	0.597067	1.31127	0.38162	0.823855	0.193909	0.878055	0.488869	0.116559
1716.1	1.76771	0.500582	0.347353	0.143768	0.157306	0.270806	0.339397	0.232333	0.370346	0.384261	0.676658	0.278754	0.484925	0.642289	0.593418	0.535296	0.588855	0.41807	0.664284	0.464638	0.479298	0.489522	0.403878	0.531622	0.665277	0.631922	0.70212	0.641055	0.604466	0.68344	0.463325	0.591945	0.643088	0.435191	0.500092	0.507172	0.379214	0.5766	0.533369	0.547874	0.404853	0.616776	1.07391	0.317118	0.880644	0.221935	0.673771	0.622107	0.228106
1715.12	1.71512	0.60757	0.386673	0.15931	0.328936	0.276397	0.210746	0.0823875	0.400986	0.580813	0.621792	0.281171	0.394694	0.654199	0.58863	0.597019	0.60464	0.364118	0.647297	0.501254	0.468465	0.482233	0.368417	0.506527	0.594448	0.581516	0.679985	0.581093	0.532021	0.650626	0.494226	0.570682	0.558868	0.374876	0.508131	0.478901	0.395538	0.589933	0.526722	0.543426	0.406115	0.515801	0.817506	0.578751	0.660285	0.197655	0.26994	0.443465	0.266285
1714.15	1.44517	0.498683	0.436009	0.282872	0.421854	0.376719	0.202137	0.0980552	0.543985	0.627393	0.563118	0.282453	0.274931	0.58057	0.562423	0.438534	0.541155	0.367039	0.550723	0.439364	0.431926	0.448927	0.298918	0.478234	0.526544	0.478411	0.607279	0.516181	0.52529	0.611137	0.465483	0.50088	0.515328	0.323468	0.520355	0.456241	0.394298	0.553968	0.516503	0.526259	0.545741	0.439889	0.626068	0.650585	0.432323	0.259472	0.0734718	0.491911	0.398562
1713.17	1.20171	0.307368	0.572018	0.425241	0.562463	0.49662	0.191938	0.395787	0.718785	0.685769	0.559416	0.340214	0.225424	0.535799	0.513758	0.355049	0.545677	0.356713	0.492639	0.323811	0.415186	0.516402	0.326742	0.438218	0.454168	0.440624	0.587458	0.495131	0.511893	0.596149	0.387205	0.458771	0.433005	0.302635	0.495786	0.434343	0.360878	0.513186	0.492837	0.515597	0.657592	0.438919	0.90014	0.699901	0.329969	0.27714	0.333631	0.508026	0.564527
1712.19	1.39621	0.173758	0.468961	0.403582	0.565688	0.575757	0.146491	0.559638	0.645676	0.420296	0.499829	0.319086	0.258949	0.498243	0.518222	0.313708	0.587933	0.351434	0.487723	0.297558	0.430241	0.557598	0.2683	0.371463	0.426963	0.424579	0.56625	0.455966	0.476342	0.578095	0.336941	0.40896	0.430091	0.275051	0.439284	0.394248	0.299352	0.476374	0.47872	0.530314	0.63564	0.486426	1.23377	0.573522	0.264151	0.405333	0.563198	0.45284	0.593431
1711.21	1.69748	0.228661	0.48319	0.468858	0.626186	0.673683	0.324332	0.86172	0.829453	0.272494	0.465058	0.306815	0.277677	0.493694	0.51345	0.271384	0.527467	0.345282	0.504677	0.277961	0.407202	0.554454	0.275635	0.375466	0.452414	0.439186	0.535006	0.438734	0.407412	0.573526	0.343028	0.429395	0.436986	0.255955	0.420519	0.376898	0.315417	0.429249	0.461598	0.473331	0.612329	0.282588	1.48442	0.355919	0.284249	0.366927	0.689478	0.398492	0.58945
1710.24	1.64931	0.412379	0.567992	0.490197	0.604821	0.627835	0.519656	0.853416	0.908045	0.442101	0.45248	0.294475	0.308975	0.496596	0.5137	0.254019	0.490841	0.357699	0.537302	0.266933	0.416156	0.51897	0.231249	0.371729	0.399012	0.454383	0.517539	0.425302	0.353908	0.54696	0.302894	0.400121	0.358192	0.257188	0.397362	0.369401	0.308572	0.407331	0.437467	0.43595	0.424524	0.311291	1.0814	0.138401	0.407815	0.618665	0.850571	0.393205	0.582088
1709.26	1.65732	0.585668	0.521072	0.430634	0.496392	0.506054	0.359474	0.646612	0.840207	0.380917	0.433745	0.306047	0.265215	0.508393	0.501645	0.268991	0.401037	0.339795	0.561379	0.282999	0.398142	0.438188	0.231779	0.351533	0.33201	0.453807	0.464086	0.415107	0.348261	0.49427	0.304277	0.369535	0.305612	0.229649	0.325281	0.35818	0.314654	0.429402	0.394781	0.402145	0.254845	0.145161	0.533305	0.189175	0.420214	0.503414	0.684777	0.16592	0.499189
1708.28	0.968231	0.652787	0.6365	0.519753	0.558083	0.561822	0.439446	0.58767	0.84715	0.456276	0.461035	0.324733	0.230984	0.45299	0.530511	0.237924	0.373651	0.351785	0.5183	0.227701	0.303706	0.393369	0.241095	0.30566	0.36301	0.431185	0.418169	0.398769	0.37908	0.469677	0.266054	0.337608	0.20334	0.275834	0.273556	0.358504	0.294559	0.426402	0.355252	0.353733	0.0596121	0.380772	0.0498184	0.130034	0.293593	0.40986	0.504252	0.0461873	0.668455
1707.3	0.745114	0.617708	0.677259	0.570973	0.391772	0.432776	0.266635	0.538091	0.62606	0.524022	0.431814	0.340148	0.276353	0.443858	0.535128	0.262792	0.416756	0.3228	0.488098	0.192487	0.309161	0.321375	0.229432	0.283763	0.326365	0.406513	0.421637	0.412443	0.365844	0.496191	0.214022	0.316788	0.18065	0.277382	0.309585	0.352499	0.247122	0.437764	0.340049	0.316051	0.363631	0.667602	0.238847	0.364553	0.406265	0.354711	0.560548	0.187667	0.807454
1706.32	0.858708	0.642996	0.646251	0.601427	0.355966	0.392366	0.135371	0.665445	0.509117	0.61364	0.469688	0.316072	0.296139	0.406624	0.492155	0.221887	0.430243	0.312175	0.466426	0.206379	0.289043	0.322927	0.172719	0.269645	0.340905	0.362432	0.425978	0.422057	0.382363	0.498936	0.172534	0.294509	0.261945	0.263975	0.30074	0.325583	0.206226	0.432667	0.327641	0.323221	0.347065	1.20379	0.853919	0.533579	0.373096	0.31462	0.498033	0.327729	0.681109
1705.34	0.991307	0.650939	0.639196	0.56747	0.308214	0.318749	0.2283	0.791705	0.517826	0.602656	0.501861	0.297779	0.392312	0.409104	0.499896	0.258664	0.397128	0.286833	0.441563	0.224662	0.293626	0.334594	0.219538	0.315543	0.408604	0.361465	0.423801	0.417844	0.35991	0.508073	0.265198	0.332897	0.34546	0.191477	0.315739	0.313787	0.241662	0.408101	0.331523	0.310929	0.53415	1.34807	1.53014	0.697577	0.570063	0.362307	0.644245	0.268972	0.574253
1704.36	1.44634	0.54641	0.629487	0.555206	0.468388	0.391177	0.353056	0.842715	0.431322	0.746215	0.501397	0.27984	0.421296	0.452988	0.53759	0.256051	0.413478	0.272293	0.420813	0.239018	0.28434	0.263858	0.336288	0.303431	0.359613	0.328986	0.415086	0.391316	0.348386	0.465105	0.321888	0.293593	0.320781	0.209321	0.31443	0.294194	0.255744	0.356521	0.303692	0.297292	0.567471	1.16131	1.73251	0.595287	0.757904	0.440329	1.0341	0.434263	0.539663
1703.38	2.00546	0.615531	0.555053	0.479044	0.429391	0.433627	0.362641	0.669956	0.547467	0.706216	0.461379	0.283427	0.394205	0.490526	0.519298	0.308423	0.404109	0.276279	0.397985	0.311879	0.281629	0.3251	0.369238	0.361744	0.391034	0.325359	0.389981	0.372509	0.376272	0.443284	0.38534	0.306846	0.249203	0.254447	0.310306	0.280857	0.262928	0.348456	0.310552	0.30219	0.435972	0.691169	1.55209	0.683984	0.776479	0.529434	1.05213	0.518141	0.456431
1702.4	1.9462	0.530834	0.60362	0.46638	0.635665	0.552654	0.713176	0.658881	0.749034	0.866793	0.416629	0.273307	0.342931	0.479542	0.523216	0.397683	0.379918	0.317488	0.360035	0.255796	0.27941	0.381119	0.362213	0.335858	0.424163	0.292801	0.395092	0.330729	0.375494	0.370512	0.396503	0.300347	0.194669	0.299914	0.274665	0.270631	0.224113	0.314268	0.287963	0.336689	0.343045	0.700461	1.17604	0.76158	0.583166	0.812834	0.895694	0.683309	0.439818
1701.42	2.25365	0.636619	0.721232	0.480694	0.513701	0.546836	0.792987	0.574773	0.802862	1.09235	0.360541	0.273123	0.324771	0.50133	0.527937	0.469073	0.367617	0.330258	0.363342	0.244856	0.365495	0.401518	0.341449	0.387525	0.404321	0.28711	0.407432	0.311603	0.365349	0.352305	0.354889	0.255858	0.258101	0.344078	0.296822	0.293741	0.225924	0.333713	0.296457	0.354582	0.493192	0.66944	0.966316	0.960697	0.503203	0.940342	0.715878	0.956844	0.399907
1700.44	1.84732	0.578457	0.592039	0.44246	0.416804	0.466455	0.564064	0.476834	0.8807	0.946322	0.364239	0.27371	0.222837	0.456869	0.46726	0.369519	0.326336	0.334214	0.402653	0.210054	0.374466	0.37976	0.301685	0.402393	0.342999	0.3289	0.384886	0.327956	0.37206	0.299064	0.240996	0.242998	0.344756	0.313824	0.29388	0.285419	0.252293	0.335502	0.291907	0.345958	0.321844	1.09618	0.882715	0.91047	0.412512	0.735498	0.457661	1.03148	0.332329
1699.46	1.42313	0.579057	0.485938	0.405446	0.370721	0.300421	0.385085	0.491134	0.790097	0.480789	0.378056	0.286004	0.255239	0.448156	0.416712	0.365229	0.262254	0.329324	0.398245	0.261081	0.377089	0.33928	0.449443	0.430881	0.375483	0.347064	0.369532	0.354103	0.335643	0.31161	0.232823	0.277014	0.427127	0.248409	0.255518	0.281748	0.272715	0.381502	0.300214	0.338674	0.519254	1.41691	1.09718	1.10555	0.680114	0.609315	0.542345	0.986137	0.468638
1698.48	1.11403	0.522306	0.335453	0.348924	0.357259	0.313901	0.309531	0.490195	0.407698	0.147687	0.340794	0.265487	0.175976	0.425487	0.352431	0.273096	0.264793	0.329459	0.352549	0.250718	0.31247	0.261225	0.465029	0.35949	0.36492	0.340156	0.326426	0.390008	0.250517	0.356792	0.190492	0.253334	0.394609	0.200992	0.204116	0.271381	0.258357	0.368909	0.278835	0.27849	0.365035	1.25131	1.35136	0.993952	0.85985	0.212288	0.743223	0.940359	0.696583
1697.5	1.22602	0.685021	0.367831	0.205271	0.285681	0.342208	0.318481	0.411652	0.220741	0.0499168	0.336425	0.259809	0.1926	0.392286	0.281311	0.226607	0.302458	0.308521	0.321331	0.215845	0.208836	0.278137	0.28917	0.309701	0.384294	0.290066	0.302703	0.384838	0.169712	0.412921	0.172043	0.253873	0.330686	0.170993	0.160767	0.240792	0.214521	0.342671	0.276639	0.230347	0.294928	0.97069	1.29729	1.05345	1.09787	0.320539	0.753294	0.627699	0.937238
1696.52	1.33692	0.825032	0.575117	0.388275	0.451496	0.536542	0.460856	0.531954	0.338637	0.419149	0.323353	0.240239	0.204613	0.362338	0.347204	0.218653	0.293105	0.328305	0.292234	0.201099	0.205383	0.308816	0.163171	0.253183	0.412645	0.243997	0.324269	0.371025	0.154918	0.421315	0.218229	0.25263	0.404702	0.131337	0.226752	0.229711	0.168652	0.297647	0.266698	0.270409	0.48432	0.786666	1.23035	1.01079	1.09646	0.724049	0.914168	0.643617	0.856205
1695.54	1.26008	0.982007	0.86362	0.484704	0.533733	0.664168	0.545861	0.584181	0.382004	0.833445	0.385301	0.211879	0.224513	0.330677	0.394274	0.20451	0.283488	0.31646	0.290628	0.222905	0.220963	0.338654	0.155377	0.222443	0.408244	0.211702	0.301226	0.30394	0.15665	0.374496	0.209859	0.203096	0.417328	0.185527	0.286794	0.248681	0.141105	0.269731	0.27573	0.271617	0.604513	0.793797	1.12928	1.16771	1.00411	0.824418	0.823456	0.650124	0.964502
1694.55	1.16515	0.787738	0.731025	0.494308	0.59089	0.533555	0.281113	0.429213	0.559922	0.763803	0.411198	0.193684	0.265119	0.281415	0.429119	0.275442	0.339361	0.295134	0.3863	0.226651	0.242148	0.28592	0.176079	0.206689	0.385474	0.250035	0.301821	0.266438	0.222286	0.277086	0.258901	0.155982	0.399958	0.24762	0.345022	0.23641	0.168033	0.251946	0.271002	0.2732	0.509198	1.15327	0.869926	1.15161	0.958958	0.723281	0.71722	0.771129	0.888846
1693.57	1.24601	0.6945	0.699721	0.731462	0.685485	0.357202	0.213552	0.45614	0.647024	0.591107	0.386103	0.22694	0.276216	0.349875	0.407129	0.394793	0.297885	0.234051	0.407073	0.234091	0.304744	0.244304	0.316421	0.218168	0.354542	0.245447	0.322646	0.270153	0.266195	0.236997	0.314575	0.179957	0.408758	0.318049	0.338405	0.233995	0.182687	0.282873	0.271778	0.271494	0.614102	1.10716	1.0969	1.0513	1.0738	0.88055	0.715818	0.916058	0.873811
1692.59	1.19979	0.737471	0.635979	0.700019	0.597368	0.164014	0.213237	0.473014	0.499927	0.538452	0.3441	0.24068	0.208119	0.295063	0.285467	0.369364	0.244556	0.163185	0.323158	0.165494	0.302322	0.183542	0.292058	0.139709	0.181178	0.232247	0.283189	0.245763	0.17019	0.200649	0.247624	0.129822	0.282582	0.289154	0.220429	0.232878	0.168519	0.248246	0.231363	0.238907	0.311479	1.13014	1.21483	0.860082	0.877501	0.834785	0.970375	0.864962	0.838001
1691.61	1.69165	0.761248	0.527971	0.50246	0.46063	0.151992	0.20591	0.478015	0.339322	0.471229	0.349362	0.249293	0.183093	0.21736	0.148204	0.326125	0.274102	0.0745568	0.290528	0.0892638	0.278245	0.141986	0.206858	0.131347	0.0969533	0.185736	0.231311	0.24839	0.0984704	0.198628	0.11273	0.102615	0.225536	0.189484	0.104546	0.222143	0.153566	0.207264	0.19558	0.219241	0.248931	1.06991	1.35864	0.558326	0.9231	0.97024	0.805725	0.671395	0.651007
1690.62	1.52111	0.929514	0.499054	0.524444	0.459004	0.346734	0.315308	0.691459	0.57159	0.684326	0.364154	0.275962	0.169571	0.23735	0.173626	0.321588	0.314027	0.124598	0.281522	0.132444	0.350723	0.212787	0.228583	0.175121	0.186951	0.19324	0.232664	0.287811	0.16311	0.269498	0.0827027	0.121504	0.220556	0.124342	0.1293	0.234948	0.154629	0.20183	0.194292	0.214282	0.382672	1.09392	1.59208	0.489529	0.861945	1.13188	1.06775	0.503621	0.565384
1689.64	1.42579	0.869757	0.557578	0.47189	0.619737	0.624717	0.410407	0.786536	0.602714	0.743107	0.374688	0.264005	0.150377	0.256004	0.171536	0.172116	0.27766	0.139072	0.278943	0.170234	0.32517	0.279267	0.200916	0.15919	0.246469	0.200632	0.210132	0.270289	0.139454	0.291446	0.0313789	0.142557	0.119084	0.125625	0.141964	0.219642	0.134443	0.196671	0.193182	0.207912	0.425099	1.28174	1.56774	0.590115	0.754198	1.06435	0.861831	0.557821	0.638557
1688.66	1.51362	0.527119	0.468424	0.447184	0.623933	0.674815	0.354195	0.644479	0.595966	0.674798	0.347333	0.277719	0.177171	0.328485	0.216663	0.12528	0.244371	0.203792	0.294785	0.222865	0.302536	0.247256	0.216777	0.156407	0.358787	0.239353	0.236529	0.241273	0.154926	0.278543	0.0610304	0.144874	0.047759	0.188241	0.128146	0.177093	0.140178	0.208303	0.199798	0.220284	0.429576	1.25903	1.5015	0.762486	0.73443	0.975701	0.837068	0.576833	0.700851
1687.67	1.74003	0.451565	0.576808	0.622432	0.676406	0.669135	0.361095	0.555085	0.462305	0.613917	0.276256	0.309958	0.182032	0.395954	0.24842	0.108302	0.205458	0.196378	0.288002	0.17911	0.254846	0.218903	0.297851	0.122907	0.349182	0.228232	0.277034	0.262635	0.187965	0.290343	0.111503	0.177222	0.0652099	0.233958	0.119072	0.163505	0.121647	0.230702	0.186668	0.241256	0.47224	0.953885	1.56968	0.486645	0.653044	1.13893	0.827352	0.51116	0.7752
1686.69	1.63296	0.379631	0.558555	0.542662	0.722627	0.474981	0.196998	0.619724	0.347003	0.529407	0.271681	0.368944	0.242001	0.383235	0.272092	0.110415	0.188485	0.164987	0.275706	0.191532	0.260553	0.219074	0.429516	0.136506	0.236312	0.239218	0.302957	0.23836	0.192741	0.254699	0.133992	0.193092	0.108823	0.196655	0.136852	0.164166	0.121948	0.230795	0.17442	0.267331	0.579619	0.95212	1.53402	0.607635	0.738007	0.967955	1.13897	0.746802	0.889154
1685.71	1.67005	0.128044	0.572855	0.466759	0.620631	0.368663	0.132225	0.544754	0.310239	0.348062	0.263779	0.354281	0.221062	0.342219	0.232484	0.239558	0.250412	0.151525	0.309266	0.267264	0.314136	0.221957	0.500876	0.194305	0.203669	0.227824	0.278406	0.235816	0.190595	0.265162	0.113961	0.202753	0.170004	0.0949417	0.158987	0.191169	0.114115	0.225494	0.18612	0.291099	0.454714	0.926328	1.55199	0.645923	0.92468	0.771251	1.16796	0.995315	0.645551
1684.72	0.655803	0.141659	0.537741	0.372876	0.427364	0.316518	0.261531	0.377434	0.526724	0.530897	0.24933	0.350256	0.322857	0.34962	0.279343	0.391018	0.311794	0.221842	0.346916	0.31697	0.377606	0.253945	0.523752	0.255198	0.235249	0.22042	0.28723	0.248583	0.256909	0.297359	0.202714	0.200506	0.295212	0.0642764	0.174342	0.236192	0.114809	0.229489	0.207576	0.288094	0.474268	1.18508	1.61833	0.814393	1.14565	0.59361	1.55463	1.01279	0.639768
1683.74	0.627037	0.145325	0.620669	0.385839	0.467838	0.323234	0.223115	0.278864	0.742963	0.474029	0.212357	0.340187	0.335169	0.358772	0.276636	0.447307	0.288886	0.261677	0.36253	0.323406	0.365854	0.268835	0.389945	0.303324	0.206494	0.221611	0.287609	0.237305	0.220973	0.246451	0.241476	0.19646	0.284257	0.0725046	0.17706	0.23203	0.141207	0.208417	0.197699	0.267446	0.521821	1.17433	1.45324	1.06654	1.20646	0.544652	1.45823	1.21136	0.362608
1682.76	0.671807	0.217591	0.628504	0.521994	0.471052	0.315955	0.220301	0.30337	0.621196	0.528597	0.267239	0.358671	0.30766	0.407302	0.278781	0.464743	0.275154	0.32416	0.291904	0.317957	0.340532	0.263474	0.252139	0.29687	0.308322	0.248158	0.276891	0.223777	0.234969	0.210422	0.148725	0.171217	0.368104	0.153254	0.163196	0.215516	0.14239	0.191801	0.21882	0.238328	0.557884	1.13596	1.35713	1.22038	1.26677	0.718294	1.29803	1.21139	0.431033
1681.77	1.29565	0.471167	0.865547	0.630783	0.563905	0.435272	0.502824	0.426675	0.653689	0.715711	0.292362	0.343365	0.279533	0.372033	0.27562	0.304635	0.261628	0.326047	0.232166	0.219383	0.27241	0.226334	0.198157	0.222772	0.240647	0.208846	0.253657	0.200417	0.215055	0.181616	0.0792565	0.0954383	0.332744	0.253183	0.0803132	0.162809	0.13088	0.175128	0.192454	0.210778	0.515877	0.834829	1.34971	1.04478	1.01663	0.897954	1.04082	1.04519	0.53153
1680.79	1.78419	0.659102	0.899001	0.733617	0.746784	0.463625	0.714005	0.765154	0.728889	0.869253	0.374969	0.365716	0.2536	0.307658	0.263302	0.183198	0.27316	0.282054	0.20698	0.195249	0.277933	0.25802	0.155888	0.192339	0.221697	0.156401	0.241247	0.169642	0.254841	0.14141	0.0652186	0.0882045	0.295649	0.293447	0.0773468	0.124078	0.13261	0.1917	0.174216	0.167377	0.58913	0.977064	1.3299	1.14652	0.98241	0.864937	0.78575	0.910886	0.889543
1679.8	1.8957	0.498249	0.982025	0.783842	0.885495	0.578841	0.881298	0.837517	0.707777	0.942725	0.388332	0.338279	0.208605	0.295833	0.232296	0.234359	0.242071	0.264879	0.183538	0.25414	0.331692	0.318193	0.217301	0.192747	0.244722	0.126612	0.211106	0.173675	0.226627	0.15583	0.0540191	0.110801	0.238645	0.267567	0.12064	0.116819	0.119785	0.209877	0.178277	0.148696	0.42945	1.23595	1.30957	1.09346	1.13484	1.02175	0.661407	0.824678	0.924697
1678.82	1.57324	0.877304	0.907023	0.718114	0.721236	0.713531	0.978452	0.789072	0.807085	1.17065	0.363269	0.280625	0.243562	0.288975	0.214575	0.263043	0.173315	0.171751	0.212881	0.240289	0.284838	0.280884	0.284861	0.187404	0.279981	0.0802812	0.169003	0.202899	0.196559	0.162412	0.113443	0.127501	0.279559	0.232803	0.151919	0.120038	0.108119	0.21051	0.160231	0.165372	0.398724	1.26795	1.17917	0.986629	1.08983	0.822848	0.738954	0.86052	1.0354
1677.83	1.35606	0.982995	0.731271	0.410789	0.407063	0.516126	0.483438	0.587092	0.632131	0.742871	0.353916	0.222189	0.21858	0.317863	0.22548	0.300642	0.143615	0.114252	0.250899	0.250702	0.254238	0.240871	0.293668	0.216229	0.228569	0.107889	0.159006	0.184198	0.169521	0.144192	0.181492	0.145907	0.337211	0.177145	0.172643	0.149474	0.120034	0.207758	0.136675	0.198326	0.643947	1.22151	1.4046	1.09088	1.19609	0.844605	1.21751	1.04263	0.967749
1676.85	1.15158	0.941966	0.318991	0.276183	0.208233	0.345506	0.194568	0.560167	0.384319	0.260647	0.38344	0.187698	0.191533	0.3737	0.211954	0.327181	0.153267	0.130421	0.229742	0.225101	0.269614	0.225609	0.236628	0.200603	0.249623	0.139873	0.132815	0.234972	0.177533	0.159228	0.153219	0.139421	0.441774	0.207496	0.204822	0.167954	0.139202	0.184177	0.152596	0.208871	0.613805	1.14778	1.79243	0.908523	1.22496	0.832522	1.42573	1.18584	0.996456
1675.86	1.14752	0.8717	0.203977	0.0986485	0.184463	0.248087	0.16023	0.217927	0.30945	0.245127	0.302272	0.137895	0.169335	0.361444	0.213294	0.221618	0.14139	0.109364	0.229392	0.220637	0.221116	0.163189	0.215357	0.134616	0.156807	0.115459	0.109347	0.20452	0.122415	0.146577	0.144547	0.0942767	0.430452	0.219756	0.172621	0.136995	0.144782	0.125032	0.138727	0.219947	0.61614	0.972129	1.74729	0.997496	0.856514	0.729624	1.434	1.14667	0.915476
1674.87	1.50998	0.622265	0.100199	0.157567	0.503233	0.134675	0.242908	0.216976	0.323063	0.302982	0.272338	0.122191	0.155651	0.286144	0.140931	0.121151	0.123134	0.0650394	0.186204	0.208871	0.135344	0.0949946	0.0905169	0.0553062	0.111587	0.0333707	0.107417	0.146414	0.133902	0.142521	0.0971259	0.0187647	0.301946	0.229554	0.109458	0.115729	0.117271	0.096464	0.0953056	0.142237	0.585892	1.06101	1.37954	0.879611	0.660352	0.684615	1.17378	0.942355	0.86598
1673.89	1.40893	0.386855	0.336027	0.361248	0.695933	0.276171	0.492037	0.16811	0.446631	0.453388	0.211556	0.17125	0.23268	0.235882	0.127063	0.151012	0.0595315	0.0856988	0.199611	0.25428	0.172556	0.192873	0.0500072	0.0405221	0.143104	0.0458388	0.14452	0.107333	0.145131	0.0967741	0.122575	0.0519455	0.261676	0.29474	0.180538	0.102397	0.0928084	0.0939168	0.0950369	0.118255	0.588813	1.06183	0.997632	0.89382	0.79068	0.968921	0.858388	1.01045	0.835042
1672.9	1.02275	0.53774	0.599639	0.605375	0.884585	0.430178	0.575137	0.241693	0.714907	0.797376	0.161301	0.215021	0.223616	0.193485	0.0985756	0.215532	0.031372	0.0886785	0.186644	0.280602	0.17098	0.232694	0.114477	0.0577569	0.222701	0.0379976	0.135841	0.0985212	0.118002	0.0662352	0.167552	0.135861	0.247884	0.251718	0.171745	0.0761836	0.0666692	0.0959263	0.0731744	0.0767475	0.48044	0.933305	0.499674	0.732271	0.822394	1.18554	0.659605	1.0836	0.751325
1671.91	0.7067	0.641358	0.607445	0.442555	0.55995	0.226611	0.367335	0.24069	0.623612	0.704502	0.120314	0.189883	0.176296	0.217711	0.125022	0.287858	0.0669403	0.12662	0.170913	0.254216	0.214338	0.267631	0.190273	0.097154	0.239759	0.0997803	0.149959	0.0346991	0.102887	0.0839211	0.217914	0.188009	0.242323	0.241044	0.174077	0.0881273	0.0548529	0.118352	0.0765078	0.0831598	0.660127	0.790099	0.787729	0.662489	1.16755	1.31269	1.14102	1.12357	0.850561
1670.93	0.601204	0.75396	0.61207	0.575642	0.429126	0.185918	0.375316	0.404596	0.776435	0.750161	0.116902	0.170687	0.173225	0.243336	0.134158	0.316943	0.129662	0.171626	0.142247	0.197791	0.272606	0.279426	0.254706	0.135001	0.285232	0.137957	0.150768	0.0973173	0.102185	0.0991731	0.225918	0.227564	0.262391	0.236131	0.168614	0.063939	0.062655	0.135537	0.0806871	0.104525	0.631706	0.899995	1.26372	0.520824	1.41946	0.934409	1.31338	0.972824	1.2019
1669.94	0.691505	0.547236	0.683433	0.466724	0.282168	0.0998244	0.209882	0.319554	0.484549	0.683852	0.185269	0.140713	0.151086	0.237589	0.124544	0.344822	0.185448	0.13783	0.157385	0.174102	0.237603	0.2543	0.341816	0.158381	0.305011	0.116692	0.127196	0.1332	0.0877949	0.133435	0.205711	0.220272	0.286957	0.185851	0.161501	0.0516455	0.0807262	0.148109	0.082109	0.136825	0.63349	1.11323	1.34538	0.759778	1.22764	0.640075	1.3094	0.665007	1.35949
1668.95	1.3854	0.383495	0.675903	0.423557	0.343584	0.151981	0.282231	0.357722	0.396741	0.625112	0.184381	0.0911396	0.119597	0.221026	0.069012	0.264186	0.166988	0.0816165	0.0956137	0.0658873	0.14371	0.170387	0.274839	0.0721966	0.219814	0.0630302	0.0807555	0.154427	0.0652744	0.159606	0.145122	0.121887	0.273563	0.12252	0.0851434	0.0366371	0.0912572	0.122658	0.0531713	0.106913	0.535217	0.950981	1.33256	0.775299	1.06356	0.542845	1.37928	0.488367	1.25094
1667.97	1.58495	0.263182	0.696543	0.545631	0.170688	0.352504	0.437789	0.323077	0.296245	0.390558	0.196427	0.133534	0.193082	0.199722	0.0609804	0.267383	0.154875	0.114636	0.126443	0.102129	0.173565	0.196353	0.241858	0.0911863	0.301334	0.0576039	0.0805873	0.163806	0.151856	0.123388	0.180146	0.0989103	0.339829	0.136338	0.181929	0.0604705	0.0876225	0.11355	0.100049	0.128131	0.497998	0.968424	1.33908	0.923147	0.656592	0.429529	1.28173	0.479151	1.10138
1666.98	1.43958	0.323996	0.59651	0.621337	0.313113	0.451909	0.449014	0.394989	0.263768	0.383133	0.11805	0.167358	0.189563	0.179271	0.0765025	0.268467	0.114402	0.138209	0.103941	0.164052	0.127797	0.225392	0.245369	0.136734	0.298566	0.0677489	0.0714763	0.143991	0.136303	0.105243	0.208203	0.110661	0.341257	0.137347	0.195666	0.0737327	0.0936262	0.0674672	0.102015	0.0939666	0.325468	0.673274	1.44516	0.929235	0.515184	0.779405	1.23139	0.453237	0.601719
1665.99	1.45751	0.460582	0.271853	0.34822	0.160321	0.426626	0.392805	0.397068	0.250749	0.267943	0.0625624	0.1453	0.122319	0.178166	0.0433455	0.18888	0.129053	0.145901	0.0908267	0.134568	0.0886894	0.175217	0.242025	0.118791	0.264751	0.0873893	0.0436589	0.0854344	0.107635	0.114155	0.140428	0.0965825	0.333953	0.106852	0.143946	0.0785578	0.0755945	0.0266409	0.109302	0.0608729	0.271168	0.414254	1.59634	0.936603	0.653673	0.88213	1.3582	0.431646	0.513869
1665	0.908678	0.543748	0.223502	0.327275	0.406123	0.631205	0.529488	0.414573	0.467889	0.59211	0.0702621	0.0895042	0.111889	0.102412	0.0495667	0.111912	0.122806	0.102204	0.0797698	0.130636	0.121941	0.110304	0.209278	0.109549	0.18378	0.0860782	0.0529878	0.0743447	0.106978	0.118681	0.0796797	0.0792738	0.334717	0.0391899	0.127354	0.0668555	0.0375212	0.0226079	0.0971703	0.069659	0.154721	0.574322	1.69764	1.00384	0.980092	0.882251	1.29929	0.551968	0.601487
1664.01	0.786107	0.287177	0.140497	0.226436	0.381296	0.512247	0.343368	0.208183	0.06791	0.521074	0.150327	0.0753698	0.105169	0.0409456	0.0531528	0.155652	0.128925	0.0533626	0.0961293	0.136129	0.150102	0.085258	0.192704	0.0929484	0.0874486	0.0599358	0.047934	0.0232616	0.0869832	0.102626	0.0203232	0.0553789	0.352862	0.075951	0.100294	0.0297824	0.027752	0.0503577	0.0785425	0.0970794	0.142616	0.697314	1.73357	1.2444	0.929904	1.05706	1.15266	0.628215	0.62144
1663.03	1.13058	0.270862	0.131731	0.0471314	0.427763	0.382112	0.319541	0.101629	0.104364	0.547189	0.179076	0.0389686	0.142348	0.0557343	0.0322983	0.184453	0.121508	0.0403643	0.0614632	0.0870528	0.187129	0.0982109	0.140925	0.0471922	0.0522752	0.0344926	0.077289	0.0582557	0.0794069	0.0815548	0.0607059	0.0804185	0.425748	0.0966762	0.116472	0.00984512	0.0542117	0.0676389	0.0488074	0.0977686	0.302285	0.83316	1.52655	1.13442	0.827382	1.10178	1.01889	0.759779	0.690958
1662.04	1.39058	0.37654	0.169661	0.288694	0.378255	0.423923	0.360933	0.123159	0.224219	0.469532	0.219618	0.0925876	0.215523	0.153824	0.0879717	0.323087	0.137197	0.116395	0.0631035	0.145897	0.268093	0.27206	0.176212	0.140771	0.24931	0.0399361	0.122784	0.11866	0.167081	0.0874475	0.218323	0.13669	0.548582	0.16935	0.196852	0.0612618	0.0612798	0.160095	0.0725705	0.116427	0.617065	1.22471	1.37053	0.873619	0.582992	0.7755	0.831827	0.772865	0.659511
1661.05	1.75839	0.753137	0.427947	0.44306	0.518476	0.456403	0.511412	0.390474	0.2924	0.735266	0.215553	0.114048	0.213485	0.215647	0.144265	0.324377	0.138459	0.129672	0.126708	0.219581	0.186255	0.432207	0.239448	0.205553	0.297121	0.0568593	0.168058	0.162782	0.211728	0.0741499	0.216548	0.146672	0.583829	0.23984	0.216287	0.113847	0.0785178	0.181795	0.0640479	0.140151	0.703982	1.19392	1.39547	0.794747	0.490494	0.51108	0.746565	0.825364	0.746509
1660.06	2.40684	0.935794	0.676651	0.555474	0.547705	0.397311	0.654015	0.383512	0.365409	0.752426	0.167668	0.152849	0.11213	0.309811	0.163073	0.284776	0.158977	0.118172	0.139308	0.257179	0.163479	0.415573	0.272904	0.181378	0.347648	0.084913	0.158382	0.221965	0.185713	0.139872	0.198142	0.190793	0.617616	0.257038	0.183881	0.13053	0.0896708	0.19271	0.102507	0.127106	0.699681	1.20025	1.48324	0.756771	0.717347	0.371029	0.820944	0.886975	1.00633
1659.07	1.80455	0.940428	0.892467	0.583136	0.523769	0.5262	0.790722	0.489031	0.532078	0.806328	0.158992	0.116006	0.0674082	0.265197	0.159084	0.230301	0.199852	0.109628	0.0985565	0.296882	0.166551	0.370654	0.263968	0.181578	0.348017	0.0740901	0.144613	0.223474	0.166139	0.170554	0.181496	0.164732	0.513136	0.236163	0.226967	0.125344	0.0763447	0.173463	0.0990859	0.1076	0.703094	1.18131	1.51191	0.846902	0.928974	0.241941	0.961564	0.987537	0.9982
1658.08	1.38532	0.814731	0.753067	0.540472	0.192352	0.417978	0.55167	0.209348	0.191346	0.585163	0.145287	0.142512	0.0246209	0.243216	0.125007	0.235336	0.147856	0.111264	0.0540438	0.273251	0.163246	0.261268	0.342133	0.153121	0.295281	0.0822587	0.141448	0.170289	0.124426	0.174924	0.114113	0.131001	0.36898	0.317401	0.258875	0.106013	0.0872654	0.148314	0.0969551	0.136362	0.615557	1.23054	1.58563	1.03259	0.798105	0.654693	1.27365	0.821396	0.821898
1657.09	0.96955	0.294675	0.513571	0.316583	0.0297138	0.277754	0.250858	0.165841	0.282555	0.311299	0.20696	0.116986	0.0879392	0.171135	0.0859521	0.180343	0.132257	0.103052	0.0117434	0.17366	0.135542	0.175127	0.394315	0.139787	0.220125	0.0689561	0.156405	0.162508	0.115152	0.177232	0.132231	0.121284	0.224617	0.303317	0.235521	0.0951035	0.0852681	0.127052	0.0587126	0.113964	0.445196	1.26437	1.48491	1.16476	0.863198	0.931914	1.37709	0.918809	0.889533
1656.1	0.983404	0.304261	0.45501	0.462964	0.14511	0.529023	0.131146	0.200288	0.440145	0.35849	0.219379	0.133561	0.142491	0.164809	0.114442	0.224865	0.14392	0.141447	0.0372358	0.142789	0.114843	0.163746	0.344754	0.204484	0.272668	0.11332	0.165668	0.11216	0.121644	0.135965	0.234509	0.123892	0.232252	0.35109	0.201145	0.120995	0.0663421	0.190074	0.101949	0.105311	0.392077	1.14743	1.2263	1.03491	0.839373	1.26679	1.39483	1.16584	0.795822
1655.11	0.916468	0.346613	0.489359	0.442757	0.393142	0.656243	0.079467	0.225159	0.628149	0.519909	0.252855	0.13554	0.184441	0.152441	0.121737	0.187065	0.11509	0.142273	0.104456	0.152967	0.104099	0.157366	0.358913	0.203541	0.256774	0.119343	0.186408	0.119039	0.219394	0.0701796	0.246857	0.103686	0.34615	0.320273	0.135461	0.143115	0.0641052	0.189285	0.132603	0.156578	0.333734	1.02041	1.19943	0.866968	0.671072	1.48829	1.35341	1.52357	1.15867
1654.12	1.53462	0.557545	0.600949	0.647832	0.70323	0.639172	0.324058	0.141856	0.808687	0.715839	0.176838	0.116476	0.137275	0.173481	0.148261	0.168118	0.0717453	0.070116	0.142813	0.175823	0.172271	0.138175	0.240821	0.194705	0.229418	0.139725	0.18575	0.119228	0.252762	0.117491	0.289144	0.11049	0.537136	0.37027	0.154865	0.144418	0.0678646	0.213813	0.1977	0.148366	0.281599	0.907346	1.34814	0.578666	0.697995	1.59029	1.15981	1.55091	1.32116
1653.13	1.43056	0.561015	0.4749	0.450201	0.628775	0.59987	0.53255	0.112927	0.765224	0.774633	0.175601	0.0787444	0.133236	0.145438	0.10038	0.150122	0.0842283	0.073948	0.113856	0.213991	0.1745	0.135057	0.105	0.222092	0.277027	0.108531	0.184651	0.123358	0.254103	0.0812946	0.308848	0.114216	0.545006	0.306614	0.210608	0.118792	0.0386475	0.199889	0.194705	0.122475	0.382605	0.779815	1.42075	0.300477	0.622492	1.48727	1.15141	1.45529	1.16294
1652.14	1.27058	0.547054	0.358139	0.341027	0.380863	0.518297	0.600172	0.117726	0.43711	0.854972	0.0982139	0.0780503	0.0888806	0.124023	0.0563807	0.149987	0.0500054	0.118777	0.0944473	0.215035	0.229887	0.123578	0.146893	0.215934	0.26456	0.130141	0.220221	0.121081	0.275823	0.0953297	0.266617	0.100279	0.550845	0.32291	0.229531	0.134995	0.0656535	0.195745	0.212923	0.125322	0.511709	1.08346	1.56479	0.335947	0.540037	1.51629	1.50784	0.991194	0.950552
1651.15	1.23463	0.437161	0.378916	0.276771	0.187333	0.349162	0.680003	0.251632	0.319	0.64461	0.127213	0.0352308	0.131469	0.0857543	0.0529092	0.0710979	0.0839406	0.119699	0.0732387	0.190938	0.231311	0.0736735	0.157928	0.131388	0.248002	0.116002	0.22294	0.128181	0.213416	0.103766	0.195381	0.110163	0.488936	0.24513	0.180965	0.124745	0.066081	0.177581	0.180354	0.0846889	0.432643	1.42675	1.57571	0.738041	0.656408	1.32212	1.65602	1.01379	0.998614
1650.15	1.19201	0.592406	0.404089	0.381668	0.237444	0.342991	0.588883	0.311532	0.112331	0.556453	0.0517144	0.0501594	0.157347	0.10245	0.0805292	0.113778	0.124676	0.123149	0.0944059	0.134849	0.149455	0.0333367	0.164469	0.0967945	0.33454	0.181734	0.229497	0.147339	0.172094	0.110777	0.143963	0.0972507	0.425983	0.273231	0.176631	0.156752	0.0838881	0.181597	0.192991	0.0963555	0.612076	1.39189	1.43291	1.0797	0.952547	0.973702	1.5063	1.10646	1.174
1649.16	1.15548	0.690615	0.629177	0.41334	0.284304	0.190714	0.267745	0.247646	0.181639	0.302404	0.0547648	0.0514165	0.211655	0.123398	0.0901721	0.124886	0.139646	0.10776	0.0858453	0.0942268	0.105026	0.0875279	0.174981	0.0988031	0.35745	0.236277	0.217199	0.202424	0.204679	0.140288	0.180901	0.135952	0.423572	0.321381	0.158482	0.174776	0.133901	0.18084	0.176504	0.163738	0.788371	1.33809	1.5806	1.27029	1.1869	0.985941	1.45548	1.21063	1.58413
1648.17	1.14972	0.924041	0.809195	0.502423	0.554024	0.208975	0.171849	0.286807	0.31896	0.341759	0.0918467	0.0544374	0.241039	0.169212	0.165555	0.20441	0.208167	0.0724729	0.17752	0.0902829	0.162149	0.189425	0.231291	0.163978	0.365759	0.264416	0.2775	0.222296	0.315116	0.218287	0.262532	0.169668	0.462727	0.402723	0.241198	0.202527	0.188686	0.230914	0.201703	0.170051	0.807129	1.60908	1.6268	1.24656	1.2381	1.09742	0.989694	1.22247	1.87778
1647.18	1.1471	0.746769	0.748883	0.454293	0.61318	0.253345	0.156893	0.202613	0.406894	0.397582	0.219871	0.0948616	0.283586	0.225953	0.203398	0.340554	0.245821	0.106902	0.239265	0.169809	0.256479	0.27693	0.255486	0.281076	0.444591	0.274681	0.272755	0.310423	0.341554	0.239341	0.362319	0.227388	0.46503	0.371578	0.323296	0.228348	0.216008	0.284502	0.26544	0.207682	0.843055	1.57152	1.74771	1.03946	1.38646	1.16735	0.940999	1.3706	1.8901
1646.19	1.0324	0.464082	0.665349	0.438069	0.76995	0.354402	0.146145	0.274112	0.188629	0.6122	0.278816	0.16877	0.35525	0.222402	0.286982	0.465376	0.302584	0.194408	0.340279	0.337546	0.440699	0.301327	0.338427	0.378968	0.484496	0.301603	0.334136	0.344907	0.479218	0.310368	0.511214	0.293513	0.588702	0.405608	0.400522	0.272113	0.262295	0.353955	0.358065	0.264769	0.951732	2.0597	1.8098	1.04145	1.43034	1.3476	1.32124	1.34537	1.74638
1645.19	0.79341	0.445227	0.787396	0.371382	0.743719	0.462738	0.495656	0.216006	0.254189	0.538161	0.334728	0.221667	0.362696	0.255959	0.301012	0.421318	0.30027	0.20617	0.328773	0.416615	0.532547	0.191428	0.289894	0.35279	0.524359	0.259617	0.342992	0.401064	0.517167	0.295861	0.58138	0.348594	0.751067	0.384334	0.450141	0.273884	0.287928	0.368157	0.403588	0.275471	0.949248	2.15067	1.85546	1.1136	1.26052	1.5468	1.40398	1.26648	1.53875
1644.2	0.303886	0.212608	0.747428	0.497843	0.673029	0.52642	0.641025	0.092764	0.241743	0.585193	0.329523	0.273186	0.336979	0.314387	0.324951	0.424943	0.305738	0.235944	0.307207	0.419031	0.500943	0.179393	0.280297	0.358704	0.540849	0.274593	0.359215	0.442497	0.569357	0.340352	0.593717	0.357685	0.868165	0.4179	0.490719	0.32306	0.32528	0.35089	0.390363	0.292656	0.927771	1.79712	1.97249	1.35449	1.45931	1.23346	1.40458	1.32508	1.39995
1643.21	0.441666	0.254266	0.982558	0.520255	0.624457	0.526538	0.642722	0.106303	0.284868	0.569823	0.363416	0.280212	0.285506	0.346019	0.340962	0.402155	0.317383	0.259165	0.266884	0.43088	0.393705	0.172946	0.223306	0.363335	0.492391	0.332401	0.354668	0.487888	0.578607	0.370248	0.613557	0.387257	0.859179	0.527549	0.506581	0.345719	0.373551	0.359414	0.365095	0.306473	0.861804	1.29348	1.98143	1.56358	1.44666	1.40893	1.53328	1.31737	1.75685
1642.21	0.100566	0.421573	1.09394	0.455395	0.600222	0.515177	0.670984	0.243139	0.226265	0.490588	0.383248	0.279701	0.307102	0.390683	0.390398	0.481403	0.326408	0.252096	0.325256	0.389904	0.312307	0.227115	0.256711	0.377652	0.480894	0.378807	0.443355	0.483955	0.653709	0.398754	0.689489	0.412006	0.840527	0.631343	0.590562	0.352788	0.419654	0.385429	0.393944	0.291273	0.929455	1.47597	1.69427	1.68814	1.40676	1.7399	1.29042	1.45196	2.10379
1641.22	0.599313	0.512569	1.03316	0.572455	0.529504	0.629903	0.578392	0.397188	0.32391	0.433882	0.39577	0.303167	0.339741	0.442695	0.416558	0.585772	0.339955	0.310546	0.36608	0.44963	0.409536	0.259443	0.221096	0.440169	0.578921	0.457032	0.452189	0.508168	0.681438	0.442405	0.748888	0.427845	0.853147	0.720621	0.671816	0.384154	0.45743	0.423383	0.455425	0.360345	0.918945	1.52939	1.60523	1.73833	1.68667	1.73657	1.21371	1.69611	2.3445
1640.23	1.00471	0.645049	0.725149	0.486788	0.58227	0.477873	0.322008	0.573653	0.174752	0.274116	0.429195	0.286159	0.449667	0.405419	0.436277	0.621426	0.317327	0.369077	0.396263	0.447183	0.446646	0.247412	0.177931	0.440484	0.600906	0.518305	0.451026	0.485181	0.730336	0.492291	0.828115	0.466873	0.827019	0.766298	0.725784	0.38281	0.436941	0.46805	0.492065	0.401851	0.968753	1.90506	1.53898	1.66635	1.97234	2.08602	1.54047	1.8615	2.08025
1639.23	1.11929	0.767114	0.674544	0.409828	0.523696	0.432593	0.281912	0.3299	0.117586	0.121719	0.401715	0.259204	0.426603	0.361892	0.351573	0.555137	0.330179	0.344679	0.354393	0.41582	0.446777	0.274968	0.162124	0.400357	0.628488	0.516955	0.432923	0.481226	0.787585	0.466162	0.903831	0.455904	0.845352	0.799117	0.721008	0.371889	0.409068	0.467709	0.512375	0.402276	1.05243	2.07973	1.47799	1.57844	1.91938	2.05838	1.47276	1.62128	1.45256
1638.24	1.15937	0.691679	0.552756	0.476725	0.423755	0.389925	0.3599	0.31641	0.279655	0.369255	0.478092	0.28504	0.400448	0.335101	0.361396	0.499868	0.404663	0.365368	0.346675	0.403002	0.455526	0.332699	0.225088	0.403106	0.642984	0.496862	0.454655	0.482897	0.82101	0.472073	0.903556	0.441804	0.881494	0.818184	0.761807	0.400733	0.431625	0.488475	0.512748	0.424252	1.02089	2.185	1.46208	1.78986	2.01316	1.93436	1.28968	1.64864	0.988458
1637.25	1.40212	0.718877	0.704683	0.517545	0.541018	0.522351	0.694442	0.273752	0.479917	0.845031	0.51082	0.309769	0.336336	0.30454	0.401621	0.451129	0.525972	0.375426	0.386732	0.457292	0.391563	0.432618	0.305795	0.365265	0.650754	0.512438	0.456549	0.520065	0.824157	0.46651	0.902746	0.427302	0.907603	0.901134	0.786075	0.459944	0.471315	0.519966	0.498064	0.470813	1.06757	2.14092	1.79763	1.97838	1.76471	1.8931	1.42545	1.60728	1.06909
1636.25	1.18701	0.844448	1.00514	0.735507	0.90262	0.778666	1.24191	0.596981	0.832598	1.20037	0.542777	0.384489	0.365215	0.344677	0.433884	0.456006	0.568038	0.301009	0.443415	0.469246	0.310708	0.520761	0.363444	0.36946	0.671091	0.50441	0.488807	0.555466	0.817758	0.474659	0.900568	0.457046	0.891516	0.940612	0.826933	0.497444	0.515602	0.543092	0.522398	0.508655	1.25765	2.32384	2.05568	2.03292	1.77206	2.06335	1.24633	1.45791	1.33474
1635.26	1.26528	0.922061	1.27331	1.09378	1.26403	1.14196	1.5782	0.820195	1.13196	1.63555	0.507369	0.441747	0.47788	0.450972	0.477346	0.549311	0.573614	0.372913	0.500418	0.61477	0.459498	0.495713	0.354519	0.493296	0.801865	0.522832	0.540464	0.583948	0.886623	0.506843	0.968103	0.548332	1.03032	1.00508	0.912094	0.557798	0.598283	0.558488	0.568182	0.589985	1.30862	2.21233	2.40039	2.00163	1.89309	1.88542	1.50014	1.41733	1.8393
1634.26	1.02214	1.01644	1.52929	1.23255	1.55156	1.12873	1.60942	0.942737	1.19178	1.64461	0.551604	0.451103	0.603638	0.498458	0.494086	0.579335	0.557532	0.394612	0.518499	0.64891	0.534808	0.431413	0.394425	0.522892	0.854687	0.541774	0.552299	0.586363	0.920182	0.538869	0.973119	0.606264	1.13409	1.05871	0.980518	0.571134	0.616756	0.573109	0.603743	0.623604	1.63811	1.98273	2.64143	2.0314	1.90796	2.10406	1.81845	1.39137	2.08305
1633.27	1.19296	0.809669	1.58077	1.11841	1.62264	0.931381	1.44484	0.712357	1.01801	1.35438	0.581998	0.442681	0.638046	0.622955	0.506693	0.649702	0.613538	0.465615	0.574348	0.706958	0.685661	0.449212	0.561441	0.605411	0.956888	0.608707	0.615715	0.628835	1.01028	0.573554	1.08701	0.675566	1.20039	1.16397	1.05024	0.591894	0.615681	0.605654	0.674974	0.636959	1.74631	1.73899	2.52561	2.24375	1.98836	2.18678	1.86483	1.43899	2.3959
1632.27	1.31017	0.663603	1.48737	0.915539	1.66235	0.663978	1.20409	0.593397	1.01085	1.16052	0.665304	0.488707	0.639926	0.652236	0.574701	0.646004	0.692324	0.490044	0.600216	0.69652	0.747853	0.40033	0.596378	0.713651	0.983151	0.654666	0.695855	0.689217	1.04669	0.62506	1.18119	0.729238	1.35543	1.242	1.15105	0.581831	0.634911	0.654556	0.735921	0.670545	1.71746	1.64036	2.35364	2.36975	1.84233	2.50126	1.83098	1.85007	2.74341
1631.28	1.7015	0.790477	1.33842	0.847802	1.59229	0.616687	1.00219	0.39945	0.954359	0.905418	0.616699	0.460302	0.573261	0.615064	0.604691	0.679453	0.744646	0.524029	0.595495	0.69689	0.732493	0.387834	0.514599	0.70058	0.924221	0.690799	0.71703	0.746349	1.04883	0.607036	1.24885	0.729436	1.51908	1.32104	1.16742	0.596786	0.625989	0.685068	0.713114	0.700605	1.68736	1.69408	2.445	2.54744	1.76785	2.54778	2.14917	2.20128	2.47036
1630.28	2.0536	0.948558	1.07922	0.962431	1.35233	0.790737	0.923489	0.552142	1.11381	0.873252	0.651045	0.503188	0.59079	0.635646	0.657407	0.726061	0.766195	0.500538	0.603625	0.65686	0.680035	0.561065	0.476919	0.698091	0.929164	0.679946	0.709076	0.785922	1.05166	0.601359	1.30465	0.739912	1.45394	1.33734	1.17943	0.618611	0.650013	0.700489	0.703582	0.724987	1.80656	2.26098	2.59899	2.66513	1.97661	2.50772	2.11827	2.3254	2.37314
1629.29	2.06796	1.03634	0.985381	1.12055	1.0452	0.945355	0.78769	0.650852	1.11263	0.979776	0.604098	0.482852	0.731817	0.605477	0.687495	0.719654	0.762376	0.539307	0.635377	0.655462	0.634947	0.663522	0.520428	0.783265	0.908388	0.721039	0.750511	0.789295	1.15634	0.626239	1.37629	0.777469	1.43289	1.39495	1.30487	0.682519	0.701259	0.699363	0.729641	0.739291	1.86072	2.51435	2.69865	2.46504	2.17109	2.4283	2.31938	2.312	2.37072
1628.29	1.67638	1.44474	1.32179	1.3288	1.11359	1.12739	0.985747	0.905743	1.13408	1.53367	0.642702	0.521479	0.790817	0.597493	0.686721	0.677388	0.773153	0.564791	0.62799	0.639628	0.644507	0.71748	0.564072	0.831897	0.987401	0.730551	0.77402	0.781541	1.22131	0.671142	1.37653	0.78493	1.30523	1.42934	1.42338	0.726849	0.744374	0.70745	0.72676	0.790227	2.08954	2.52341	2.55411	2.56941	2.31529	2.30209	2.57053	2.32944	2.4442
1627.29	1.72254	1.50142	1.43132	1.18986	1.03442	1.22929	1.19241	1.00028	1.23007	1.71569	0.794548	0.554283	0.859443	0.758011	0.780744	0.734661	0.857126	0.733856	0.739533	0.701682	0.75386	0.848246	0.816891	0.989649	1.14853	0.844171	0.831481	0.848819	1.30258	0.763126	1.46072	0.901469	1.25908	1.44634	1.50586	0.813662	0.807985	0.768596	0.821108	0.825833	2.19659	2.50997	2.52225	2.58652	2.46111	2.26861	2.51082	2.49962	2.58802
1626.3	1.51725	1.38301	1.65953	1.07288	1.23549	1.22838	1.44146	0.919492	1.20299	1.65323	0.912037	0.671967	0.905584	0.880447	0.84427	0.804292	0.995121	0.818668	0.838735	0.843832	0.837596	0.896562	0.867467	1.13115	1.28517	0.919598	0.912507	0.90215	1.36668	0.902989	1.55464	1.01912	1.35428	1.48392	1.56092	0.870675	0.878517	0.850022	0.918828	0.872163	2.00234	2.33639	2.46842	2.47209	2.34826	2.27718	2.22798	2.58995	2.77287
1625.3	1.49881	1.4031	1.77163	1.06493	1.32928	1.15547	1.51301	0.701277	0.962139	1.31059	0.944291	0.698694	0.867369	0.923476	0.880612	0.968155	1.00547	0.880564	0.843303	0.957038	0.948693	0.825797	0.732982	1.13312	1.32907	0.939436	0.937292	0.947912	1.4061	0.959505	1.57384	1.04384	1.47444	1.52102	1.49777	0.898253	0.888215	0.937279	0.940665	0.921257	1.94076	2.24222	2.28154	2.44124	2.0304	1.96022	2.12351	2.32103	2.50777
1624.3	1.50773	0.968977	1.60623	0.886331	1.10961	0.966105	1.37814	0.387613	0.724571	1.25845	0.891871	0.742697	0.868869	0.961013	0.849787	1.03283	1.09913	0.858582	0.835592	0.990717	0.972253	0.86911	0.637564	1.03683	1.2868	0.935762	0.959289	0.943749	1.42507	0.973089	1.557	1.03378	1.48551	1.47723	1.41228	0.913189	0.911004	0.960044	0.944028	0.951378	1.83649	3.03579	2.20414	2.51727	1.87815	1.78629	1.91844	2.10866	2.26597
1623.31	1.46315	0.799892	1.47756	0.835628	1.1227	0.815721	1.1382	0.359776	0.746685	1.0781	0.790256	0.757035	0.901462	0.92444	0.808593	0.989924	1.16299	0.801468	0.861789	0.966399	0.973388	0.814497	0.620771	1.02569	1.19134	0.949484	0.960405	0.986187	1.46636	0.997004	1.50714	1.04624	1.57294	1.45566	1.38286	0.947065	0.900331	0.944292	0.969967	0.962835	1.61636	3.03711	2.31725	2.65117	1.61853	2.0175	1.80064	1.77452	2.17427
1622.31	1.25537	0.882504	1.44967	0.849409	1.34496	0.788315	1.12521	0.402521	0.888037	1.34115	0.762272	0.795446	0.885561	0.867901	0.757514	0.950574	1.224	0.803707	0.831564	0.951907	0.931383	0.804231	0.61361	0.976749	1.15819	0.950842	0.985026	1.03763	1.51635	1.01773	1.46417	1.0949	1.52055	1.39899	1.3663	0.920834	0.89505	0.94515	0.967883	1.02844	1.63002	2.72978	2.255	2.90217	1.63199	2.05631	1.99429	1.6831	2.19383
1621.31	1.03578	0.9234	1.35041	0.737703	1.3827	0.949927	0.991245	0.464701	1.16652	1.29796	0.814485	0.813838	1.02421	0.898601	0.851447	1.00239	1.21747	0.870095	0.900514	1.03277	0.97278	0.918093	0.81523	1.09252	1.23012	1.02244	1.01965	1.07312	1.54436	1.06843	1.48807	1.18917	1.46149	1.39427	1.35159	0.975897	0.957032	0.994637	1.05318	1.05379	1.8426	2.62921	2.33691	3.05333	1.60069	2.11973	1.99129	2.02251	2.24042
1620.31	0.750354	0.971606	1.3728	0.909526	1.51538	1.06101	1.02791	0.549974	1.09435	1.19056	0.888904	0.879152	1.12226	0.930535	0.946561	1.05385	1.27161	0.884228	0.969358	1.13858	0.988825	1.03116	0.908597	1.17201	1.31915	1.08922	1.07079	1.09813	1.5495	1.13748	1.55363	1.26426	1.43087	1.48147	1.41249	1.02909	1.03902	1.04919	1.14563	1.07316	1.81609	2.05057	2.67171	2.9166	1.78792	1.89579	1.83892	2.26953	2.46513
1619.31	0.657782	1.10277	1.44435	1.01273	1.60732	1.07962	0.895813	0.535107	0.805966	1.18167	0.96927	0.827689	1.10118	0.950834	1.04181	1.0829	1.23615	0.871056	0.947638	1.17784	1.02042	1.11972	0.826461	1.20748	1.39603	1.10827	1.07368	1.0704	1.55285	1.16764	1.57249	1.26506	1.37669	1.55663	1.45918	1.04765	1.06679	1.12317	1.19047	1.13147	2.06193	1.9869	2.72721	2.44151	1.75128	1.49262	1.75163	2.20582	2.27368
1618.32	0.660765	1.21875	1.50819	1.07137	1.72733	1.06827	0.903711	0.610493	0.782715	1.33505	0.925714	0.822652	1.0119	0.979201	1.04019	0.963212	1.24177	0.889774	0.8924	1.13072	1.03811	1.08271	0.702696	1.13296	1.35811	1.11633	1.06273	1.06273	1.51675	1.14518	1.56676	1.21683	1.35351	1.55274	1.45708	1.04767	1.10353	1.16674	1.16861	1.14066	2.12999	2.56104	2.89594	2.29044	2.00016	1.2142	1.63509	2.05385	1.71234
1617.32	1.21189	1.52846	1.74814	1.14846	1.8794	1.14002	1.08645	0.899823	1.11862	1.42091	0.961242	0.89378	0.967593	1.06982	1.09752	0.99093	1.23977	0.961985	0.986181	1.14075	1.10568	1.05024	0.665873	1.20556	1.42943	1.142	1.06213	1.16614	1.51464	1.17353	1.63065	1.25524	1.52399	1.57011	1.50634	1.08301	1.13709	1.18328	1.22026	1.18496	2.15093	2.65704	2.91852	2.37572	1.86821	1.17769	1.86263	1.91479	1.6401
1616.32	1.7964	1.65245	2.02626	1.1017	1.9917	1.33242	1.51908	0.950244	1.26784	1.65894	0.996336	1.00715	1.04046	1.13965	1.17526	1.13115	1.30333	1.03285	1.06291	1.20414	1.11863	1.03813	0.67011	1.30647	1.51352	1.19213	1.12958	1.24711	1.60688	1.2668	1.72245	1.36885	1.64523	1.51992	1.56934	1.12125	1.16828	1.24301	1.2735	1.27501	2.1189	2.71682	2.73288	2.3443	1.74528	1.46383	1.74157	1.85928	1.77871
1615.32	2.18372	1.96416	2.26944	1.09353	2.01463	1.52296	1.83089	1.05544	1.4945	1.68609	1.08631	1.10282	1.146	1.20233	1.2587	1.35304	1.35246	1.06476	1.14443	1.27486	1.12661	0.991727	0.817867	1.47991	1.59855	1.25197	1.18197	1.29014	1.65645	1.33584	1.74468	1.41953	1.71177	1.53302	1.59747	1.18607	1.24197	1.30362	1.34818	1.33146	2.04162	2.6504	2.35025	2.3365	1.61183	1.78003	1.58961	2.02214	2.27211
1614.32	2.38121	1.91116	2.23009	1.32541	1.84171	1.62601	1.92007	1.08536	1.37288	1.74159	1.123	1.16667	1.18487	1.26399	1.2924	1.47639	1.44629	1.07282	1.16384	1.28693	1.11834	1.06756	0.994084	1.57212	1.61579	1.30443	1.21401	1.3397	1.66975	1.37574	1.70932	1.48323	1.77591	1.59184	1.61495	1.2498	1.28907	1.33326	1.43809	1.35961	1.84136	2.16549	2.50718	2.10269	1.56111	1.73472	1.72749	1.83608	2.27016
1613.32	2.26708	1.76051	2.02348	1.46241	1.58429	1.54246	1.71102	1.06351	1.16407	1.79941	1.18202	1.21803	1.24135	1.29489	1.331	1.50053	1.52237	1.05428	1.13959	1.25371	1.17909	1.11283	1.07561	1.59429	1.64349	1.32822	1.24021	1.32444	1.7091	1.35976	1.69057	1.51319	1.6788	1.58334	1.64261	1.27722	1.29993	1.36008	1.50011	1.45253	1.83913	2.01505	2.2719	1.78594	1.62505	1.72855	1.64281	1.52992	2.2406
1612.32	1.66604	1.73378	1.89776	1.75428	1.67339	1.57585	1.84748	1.08408	1.44974	1.95051	1.26989	1.27488	1.26126	1.32851	1.31613	1.42828	1.56954	1.12712	1.11629	1.33633	1.32091	1.17024	1.30662	1.61687	1.62749	1.36895	1.28429	1.3544	1.78056	1.34575	1.71952	1.52368	1.65763	1.63538	1.67641	1.29864	1.30929	1.41522	1.49378	1.49797	2.10627	2.05598	2.2338	2.1542	1.9711	1.79986	1.93165	1.48886	2.02898
1611.32	1.5199	1.6969	1.80015	1.87207	1.75558	1.59523	1.87264	1.18212	1.62238	2.09058	1.35073	1.37968	1.40093	1.425	1.36089	1.43901	1.63964	1.28154	1.19568	1.46243	1.48345	1.294	1.43416	1.6483	1.70667	1.44878	1.37238	1.39343	1.87415	1.39593	1.8414	1.58362	1.60561	1.67171	1.73846	1.31251	1.35236	1.44287	1.49298	1.54098	2.37544	2.07307	2.03331	2.42687	1.99183	1.79787	2.3693	1.64975	2.12279
1610.32	1.68266	1.67905	1.89219	1.82794	2.05511	1.77915	2.04205	1.33258	1.90461	2.39942	1.36681	1.47283	1.55254	1.49905	1.45213	1.57985	1.68782	1.34386	1.23788	1.5864	1.63966	1.36738	1.38991	1.73368	1.86581	1.51249	1.42816	1.38659	1.92127	1.46549	1.96505	1.63896	1.68295	1.67313	1.8119	1.36841	1.39198	1.49426	1.50863	1.57502	2.56931	2.17647	1.74688	2.24603	2.06976	2.07489	2.21739	1.94586	2.06444
1609.32	1.83984	2.00848	2.10909	1.87366	2.27425	1.95117	2.34422	1.52959	2.09978	2.34812	1.44155	1.53281	1.54056	1.56534	1.51592	1.68811	1.73827	1.38981	1.31532	1.63167	1.65196	1.39576	1.44138	1.75426	1.95887	1.5265	1.46929	1.46747	2.01051	1.57287	1.99959	1.65415	1.76856	1.71852	1.80853	1.42039	1.47076	1.5391	1.55032	1.59294	2.53345	2.34046	1.75506	2.24601	2.09268	2.15844	2.00202	2.0224	2.15084
1608.32	2.5523	1.92009	2.21866	1.84742	2.24405	2.0479	2.41471	1.64728	1.99522	2.32237	1.49698	1.56407	1.47857	1.59118	1.60922	1.85934	1.75319	1.48718	1.39117	1.68252	1.75933	1.47017	1.45508	1.78734	2.02445	1.5327	1.50219	1.53926	2.05581	1.63523	1.96893	1.72667	1.93671	1.79838	1.80838	1.48204	1.51209	1.60099	1.66018	1.6321	2.85453	2.41883	1.97973	2.42051	2.07388	2.0174	2.2361	1.64733	2.00981
1607.32	2.98972	1.99939	2.38904	2.03581	2.15798	2.00677	2.41349	1.62489	1.96366	2.28752	1.5037	1.62857	1.50321	1.60866	1.66336	1.97508	1.77202	1.48241	1.46836	1.69606	1.83979	1.40127	1.4716	1.81129	2.0605	1.55018	1.49486	1.59182	2.09446	1.64977	1.95584	1.79453	1.83829	1.81602	1.82182	1.54794	1.5777	1.6297	1.71324	1.70828	2.83776	2.53061	2.22604	2.27095	2.27432	2.1214	2.30822	1.44067	2.16577
1606.32	3.20022	2.04858	2.48842	2.23093	2.25809	2.12598	2.66957	1.58862	2.02115	2.38014	1.66467	1.64853	1.51907	1.64549	1.66856	1.99977	1.86543	1.56649	1.51517	1.87277	1.85793	1.42211	1.67215	1.89168	2.06354	1.56485	1.54255	1.72907	2.14772	1.6978	1.95225	1.85013	1.89709	1.83126	1.86074	1.60866	1.63602	1.68574	1.79457	1.77028	2.89033	2.46002	2.55164	2.63029	2.3894	2.38623	2.38573	1.65117	2.22307
1605.32	3.11233	2.20237	2.54661	2.32497	2.50108	2.30385	2.81194	1.78648	1.92812	2.50124	1.79148	1.68672	1.66372	1.64842	1.68949	2.00058	1.97568	1.64218	1.53725	1.96494	1.90881	1.47679	1.73461	1.95952	2.03233	1.63424	1.62511	1.78683	2.16779	1.70864	1.96762	1.8818	1.92291	1.87558	1.89756	1.65589	1.70486	1.73834	1.82521	1.84374	2.70465	2.4772	2.63675	2.83998	2.38614	2.32865	2.32623	1.86769	2.38201
1604.32	3.25775	2.17408	2.47061	2.17628	2.82189	2.4597	2.88934	1.9736	2.02322	2.69476	1.80513	1.76213	1.79245	1.71133	1.73394	2.08094	2.13085	1.69604	1.52638	2.0263	1.89916	1.61127	1.70447	2.06344	2.09065	1.71037	1.67037	1.82349	2.20668	1.76563	1.99847	1.94239	2.021	1.89431	1.95787	1.7422	1.75119	1.82013	1.87785	1.94336	2.71155	2.47585	2.29064	2.74826	2.30721	2.39543	1.95895	2.18993	2.14909
1603.32	2.96438	2.22989	2.36774	2.09197	2.80461	2.60402	3.00494	2.27268	2.03584	2.72624	1.84094	1.89899	1.90969	1.81072	1.78295	2.11134	2.21864	1.78656	1.64509	2.03864	1.8786	1.82491	1.77316	2.12693	2.22739	1.76794	1.77218	1.9423	2.30379	1.86604	2.001	1.98064	2.04281	1.86181	1.92875	1.83039	1.83603	1.93185	1.94635	2.02244	2.35636	2.64169	2.25673	2.61538	2.25488	2.15644	1.7145	2.25407	2.19687
1602.31	2.94284	2.1467	2.35054	1.89497	2.73846	2.58855	3.03374	2.4163	2.07234	2.74527	1.96621	2.06172	2.01438	1.92888	1.91323	2.21595	2.29466	1.8967	1.76226	2.1125	2.02061	1.98152	1.88523	2.30742	2.34812	1.8981	1.85126	2.02619	2.34761	1.98145	2.01805	2.02926	2.11951	1.84284	1.95017	1.93472	1.90496	2.02669	2.06136	2.14029	2.69121	2.70092	1.94025	2.57404	2.35553	2.0314	1.7638	2.11351	2.47207
1601.31	2.58172	2.16178	2.54215	2.05613	2.62471	2.52013	2.7571	2.23379	2.22641	2.80318	2.09576	2.22465	2.09291	2.07421	1.99193	2.37219	2.38176	1.95552	1.88027	2.22744	2.25562	2.03616	1.99403	2.48188	2.49573	2.02634	1.8868	2.14113	2.45092	2.10246	2.07774	2.13646	2.03407	1.79848	1.98651	2.08477	2.03157	2.14339	2.15789	2.25573	3.00991	2.6527	2.34294	2.78322	2.66196	2.11469	1.98789	2.20119	2.58946
1600.31	2.98416	2.09937	2.74903	2.18147	2.53395	2.38898	2.61247	2.10749	2.18493	2.83992	2.3132	2.31861	2.15962	2.16797	2.06149	2.40111	2.50319	2.0556	1.96779	2.30612	2.33528	2.05701	2.09654	2.57849	2.61847	2.11271	1.94612	2.25167	2.53534	2.2225	2.10831	2.16222	2.14464	1.78183	2.01348	2.21352	2.15397	2.2264	2.27834	2.35877	3.09082	2.61649	2.56625	2.92547	2.86424	2.40422	2.05195	2.08532	2.29081
1599.31	2.63643	2.41177	3.12511	2.32732	2.61559	2.43871	2.5876	2.16239	2.19543	2.90057	2.43429	2.38268	2.31843	2.21638	2.21601	2.59745	2.60871	2.1889	2.05546	2.445	2.48416	2.1191	2.13557	2.67879	2.65852	2.21443	2.04801	2.31429	2.57666	2.32013	2.23261	2.2169	2.26977	1.85728	2.11693	2.3237	2.26066	2.33394	2.41127	2.51098	3.19493	2.74658	2.84994	3.07006	2.99679	2.64498	2.28905	2.43493	2.34321
1598.3	2.63326	2.58322	2.93916	2.34147	2.53935	2.46849	2.68243	2.1359	2.1588	2.86676	2.39821	2.42244	2.39416	2.37962	2.34937	2.723	2.69305	2.2931	2.11945	2.5696	2.57641	2.21147	2.14476	2.79033	2.75576	2.27539	2.08257	2.3819	2.65118	2.42797	2.3278	2.28259	2.30902	1.92407	2.22069	2.3976	2.36878	2.42672	2.52689	2.62657	3.39077	2.72352	3.0256	3.48939	3.35894	2.74656	2.48232	2.54858	2.22221
1597.3	2.56349	2.76012	2.75276	2.24424	2.37843	2.50122	2.66175	2.22847	2.09119	2.65194	2.34154	2.48712	2.44206	2.4557	2.4726	2.83062	2.7085	2.41832	2.22611	2.64728	2.61656	2.33777	2.22814	2.80488	2.88141	2.27623	2.16382	2.47614	2.7282	2.48168	2.36356	2.3088	2.25836	1.97491	2.23644	2.42798	2.45058	2.50361	2.62832	2.63171	3.33328	3.34005	3.45634	3.36178	3.47418	2.54646	2.73242	2.77372	2.42854
1596.3	2.5229	2.72459	2.59542	2.138	2.36266	2.46951	2.65923	2.25227	2.11674	2.58107	2.2838	2.52246	2.43485	2.57445	2.55795	2.85413	2.75772	2.43112	2.3115	2.72906	2.66283	2.3471	2.36565	2.85397	2.94433	2.30405	2.22757	2.51309	2.74974	2.56918	2.37806	2.32036	2.10993	2.02362	2.22188	2.43271	2.48467	2.48829	2.66394	2.6269	3.21699	3.55213	3.52306	3.22011	3.36394	2.55796	2.67362	2.88305	2.80031
1595.3	2.37062	2.55141	2.58564	2.30287	2.53401	2.42331	2.65747	2.27285	2.06914	2.68007	2.37153	2.51289	2.39615	2.57957	2.52387	2.81585	2.78609	2.43069	2.38943	2.7061	2.70675	2.33993	2.41012	2.81718	2.93358	2.33369	2.27897	2.58518	2.79442	2.60093	2.38564	2.35501	2.01775	2.00363	2.21206	2.44382	2.46421	2.46323	2.65267	2.60165	3.08397	3.24046	3.62202	3.2521	3.42774	2.63661	2.55835	3.01774	3.00797
1594.29	2.71191	2.23217	2.58056	2.30327	2.65794	2.29788	2.48828	2.4133	1.92035	2.61245	2.33454	2.45771	2.31828	2.47182	2.42936	2.64192	2.76253	2.3703	2.39136	2.5074	2.56969	2.25465	2.29762	2.67331	2.84646	2.32006	2.26511	2.51905	2.76873	2.6291	2.33587	2.33924	1.97804	1.97766	2.12891	2.42266	2.41749	2.4221	2.57973	2.53334	2.5839	3.19039	3.41068	3.02062	3.30696	2.86291	2.38748	2.78758	2.8669
1593.29	2.06822	2.25645	2.40229	2.17901	2.74348	2.41736	2.4977	2.56747	1.84085	2.74184	2.42155	2.39165	2.28543	2.3963	2.4025	2.7466	2.78318	2.47456	2.43932	2.49222	2.53307	2.29481	2.11494	2.64248	2.78039	2.31177	2.30305	2.50094	2.75006	2.66711	2.3963	2.36451	1.97264	1.96699	2.1791	2.36089	2.37161	2.40142	2.53199	2.5438	2.38955	2.95737	3.18186	2.95382	3.05344	3.00955	2.24624	2.9451	3.02079
1592.29	2.34805	2.27284	2.30278	2.32365	2.56861	2.56083	2.76372	2.85715	1.86939	2.74407	2.4407	2.30591	2.25791	2.42821	2.38527	2.78356	2.66243	2.49135	2.41896	2.48556	2.49683	2.37591	2.14589	2.63873	2.71469	2.29316	2.28429	2.5046	2.73266	2.64421	2.44361	2.31062	2.00069	1.95335	2.21006	2.2946	2.33682	2.40829	2.51705	2.55487	2.39347	2.61451	2.8773	3.20718	3.27897	3.19588	2.33048	2.81875	3.10238
1591.28	2.46196	2.42355	2.4368	2.29311	2.6633	2.64285	2.83518	2.84246	1.87466	2.74838	2.50356	2.248	2.28414	2.37302	2.49042	2.83853	2.57298	2.56274	2.43186	2.51315	2.48611	2.52672	2.21988	2.61662	2.70444	2.30772	2.29348	2.53822	2.82207	2.70365	2.56153	2.32508	2.12126	1.95063	2.29842	2.29173	2.32392	2.42788	2.59085	2.54318	2.72357	3.10945	2.89257	3.09292	3.30923	3.12732	2.58316	3.04733	3.21244
1590.28	2.34632	2.36039	2.49038	2.43017	2.68664	2.63888	2.81508	2.71991	1.91203	2.80945	2.54763	2.21693	2.36941	2.43851	2.6057	2.94453	2.56579	2.58339	2.51385	2.66022	2.52701	2.64164	2.45579	2.6255	2.68321	2.33963	2.34418	2.57805	2.92365	2.77107	2.68557	2.38153	2.24486	1.96875	2.38238	2.27894	2.32343	2.49005	2.63038	2.56409	2.8399	3.35722	2.90763	3.37153	3.23871	3.2718	2.77495	3.05789	3.2692
1589.27	2.00508	2.21092	2.46214	2.59299	2.56452	2.38614	2.88285	2.7287	1.86101	2.76831	2.55205	2.1886	2.47481	2.47979	2.65012	2.91041	2.56238	2.5865	2.60246	2.63008	2.55527	2.73761	2.53666	2.62051	2.66383	2.3713	2.39599	2.65492	2.91824	2.76332	2.74019	2.38009	2.30209	1.93649	2.40283	2.25571	2.2872	2.4713	2.59858	2.5181	2.65794	3.11154	2.65946	3.15651	3.54673	3.06061	2.7248	2.92975	3.03347
1588.27	1.7772	2.09807	2.31821	2.42078	2.46325	2.12389	2.39551	2.55594	1.64214	2.58458	2.48706	2.18443	2.45079	2.52022	2.66667	2.85707	2.59175	2.59023	2.64415	2.58312	2.56722	2.6867	2.43496	2.60822	2.73007	2.35708	2.36774	2.70837	2.90582	2.81481	2.75979	2.4269	2.36078	1.95188	2.39985	2.24633	2.28957	2.52561	2.57805	2.50884	2.5107	3.34921	2.70733	3.16211	3.43253	2.6541	2.67593	2.83218	2.8745
1587.26	1.3862	1.92789	1.98428	1.94663	2.25834	2.04882	2.34562	2.50559	1.52391	2.51155	2.51028	2.16899	2.34313	2.53871	2.61951	2.83337	2.58253	2.6067	2.63584	2.55334	2.61935	2.64254	2.41179	2.63547	2.73217	2.30328	2.34656	2.7703	2.85859	2.81735	2.6865	2.4745	2.34227	2.03016	2.39292	2.20205	2.27321	2.50947	2.53345	2.48469	2.34298	3.42431	2.74398	3.4068	3.30116	2.33834	2.27293	2.67984	2.81282
1586.26	1.94719	1.79818	2.02473	1.82479	2.01851	2.03234	2.32288	2.65545	1.40673	2.4986	2.46825	2.14242	2.23966	2.48085	2.5006	2.82322	2.43783	2.53829	2.56294	2.46353	2.60614	2.66416	2.51508	2.59355	2.68075	2.27678	2.325	2.80596	2.84951	2.74927	2.66175	2.46508	2.25473	2.05288	2.41112	2.16041	2.2369	2.50255	2.50336	2.46551	2.27095	3.29478	2.83006	3.31556	3.03365	2.41957	2.10621	2.74498	2.67658
1585.25	2.31832	1.83435	2.02016	1.81632	2.10614	2.12517	2.41058	2.46849	1.50897	2.55167	2.44047	2.08493	2.18492	2.40266	2.45716	2.77216	2.36475	2.50261	2.51108	2.45088	2.59425	2.59958	2.54772	2.53925	2.68563	2.33718	2.3151	2.8273	2.90889	2.75543	2.67252	2.51539	2.30092	2.0273	2.48791	2.19871	2.25159	2.48179	2.54717	2.4892	2.17917	3.45712	3.0194	3.20227	2.89641	2.43952	2.14844	2.89771	2.68745
1584.25	2.37047	2.05858	2.25072	2.06153	2.33789	2.36947	2.63758	2.47224	1.8534	2.75699	2.38405	2.05942	2.20745	2.35547	2.39835	2.76645	2.34222	2.44534	2.45303	2.45294	2.55264	2.53854	2.65316	2.48793	2.56854	2.34271	2.32512	2.82026	2.94252	2.71076	2.62788	2.55964	2.37085	2.03995	2.44637	2.17791	2.22561	2.5194	2.54235	2.47525	2.06734	3.47725	3.11962	3.22475	3.04595	2.68788	2.42169	2.95012	2.64083
1583.24	2.0608	2.00056	2.10317	2.24179	2.23092	2.30518	2.50937	2.46396	1.80751	2.4329	2.32366	2.01698	2.2558	2.36702	2.39145	2.76354	2.42125	2.42812	2.43979	2.44524	2.53749	2.55582	2.67973	2.48056	2.54094	2.34707	2.36287	2.80319	2.94884	2.60332	2.64835	2.52332	2.38634	2.04429	2.38172	2.13712	2.2085	2.45633	2.51552	2.4174	1.99017	3.31464	2.93142	2.84808	3.14013	2.54683	2.46501	2.80865	2.35206
1582.23	1.70555	2.00093	1.99529	2.25495	2.21988	2.15771	2.06717	2.29812	1.57169	2.09951	2.34556	2.03001	2.22852	2.34672	2.40789	2.78589	2.49236	2.43717	2.44662	2.49955	2.47801	2.51832	2.61898	2.54025	2.62711	2.35232	2.35306	2.8544	2.94347	2.62169	2.65188	2.52779	2.39656	2.04608	2.37379	2.13235	2.16902	2.46741	2.52811	2.42938	2.19961	3.45777	2.69028	2.87	2.775	2.49449	2.65684	2.82446	2.71117
1581.23	1.64912	2.00006	1.83252	1.93957	2.02413	1.94541	1.8359	2.40297	1.31328	1.82466	2.32924	2.03691	2.18241	2.32487	2.35471	2.73409	2.48039	2.42797	2.41916	2.53021	2.47077	2.59132	2.72755	2.56173	2.69552	2.31806	2.32661	2.81755	2.86827	2.61294	2.61153	2.55354	2.32353	2.03283	2.30301	2.09351	2.14102	2.43833	2.51127	2.40005	2.28262	3.31767	2.57832	2.91615	2.70402	2.40557	2.63467	2.54816	2.84291
1580.22	1.55427	1.91222	1.84465	1.84472	1.83312	1.78583	1.6279	2.52986	1.05471	1.81825	2.30658	2.01758	2.09604	2.28099	2.3149	2.69864	2.40639	2.42418	2.40035	2.53573	2.50227	2.76923	2.71976	2.55319	2.69515	2.27785	2.29758	2.81402	2.81601	2.59261	2.65327	2.52953	2.25881	2.04469	2.34353	2.07776	2.1395	2.40246	2.46958	2.38427	2.27762	3.01355	2.45789	2.70674	2.5064	2.31823	2.64286	2.72554	2.80112
1579.21	2.0206	1.84989	1.76601	1.86916	1.54117	1.84605	1.66447	2.33061	1.08816	1.94697	2.27675	1.94769	2.05511	2.24083	2.26447	2.65522	2.40063	2.38639	2.40177	2.52813	2.47192	2.70349	2.66011	2.49773	2.70475	2.25392	2.26906	2.79719	2.71611	2.61465	2.63068	2.48819	2.22542	1.91794	2.28949	2.05255	2.1511	2.36676	2.46291	2.42245	1.89884	2.55266	2.5353	2.7159	2.53117	2.26394	2.51151	2.60629	2.6505
1578.21	2.34994	2.01929	1.99778	2.00986	1.60537	1.90361	1.91339	2.41338	1.15724	2.24458	2.13364	1.90699	2.0295	2.19616	2.2075	2.5756	2.35407	2.36189	2.347	2.42177	2.36145	2.59163	2.40484	2.39033	2.56409	2.17119	2.24499	2.69732	2.61591	2.5609	2.53323	2.40749	2.2449	1.80237	2.19152	2.01879	2.0914	2.35537	2.3871	2.3615	1.4844	2.04774	2.67869	2.45021	2.9092	2.10566	2.80932	2.69098	2.28972
1577.2	2.24197	1.75686	1.97301	1.90547	1.54241	1.74767	1.9318	2.15632	1.22544	1.9243	2.06809	1.84991	2.0518	2.18208	2.18331	2.60819	2.28482	2.32946	2.33844	2.39247	2.3157	2.56779	2.35138	2.29911	2.45874	2.14562	2.20995	2.58698	2.58321	2.49384	2.48134	2.3545	2.19051	1.69884	2.15881	1.97872	2.07148	2.32373	2.36067	2.29972	1.24325	2.0179	2.59891	2.19535	3.13315	1.9479	2.53284	2.41465	1.85508
1576.19	2.17108	1.77009	1.79442	1.84955	1.48164	1.70422	1.97225	1.88418	1.488	1.70282	2.06023	1.87761	2.0631	2.10786	2.21922	2.72664	2.12178	2.30436	2.34169	2.36875	2.25004	2.43159	2.39719	2.26934	2.40506	2.16242	2.2012	2.5535	2.50668	2.47961	2.43778	2.32696	2.10306	1.6085	2.15801	1.95842	2.03128	2.30404	2.3465	2.27789	1.30711	2.45425	2.6772	2.3082	2.9469	1.75455	2.0974	2.40898	2.11856
1575.19	2.22364	2.05751	1.51261	1.70819	1.59136	1.6251	1.94523	1.74969	1.42261	1.73963	2.08454	1.93805	2.12107	2.11549	2.2731	2.76228	2.04494	2.34798	2.36808	2.36132	2.2718	2.4465	2.46317	2.34271	2.42538	2.17235	2.20857	2.50858	2.53316	2.39059	2.43198	2.32416	2.05173	1.62313	2.18511	1.93795	2.01632	2.2826	2.31953	2.27379	1.49059	2.78348	2.58433	2.3748	2.988	1.85037	1.91625	2.27622	2.51196
1574.18	2.22819	2.087	1.36788	1.62044	1.69073	1.59595	1.90151	1.76203	1.15512	1.77418	2.14147	1.96337	2.07995	2.12108	2.31094	2.71737	2.1054	2.34354	2.3969	2.39292	2.36018	2.51455	2.50573	2.36608	2.35858	2.13508	2.15662	2.47691	2.46985	2.34107	2.41591	2.28739	2.03764	1.70293	2.16444	1.94669	1.98811	2.20317	2.24643	2.22756	1.57882	3.03796	2.39724	2.65715	2.90557	1.58607	1.75418	2.28544	2.37979
1573.17	2.56922	2.07286	1.03691	1.46483	1.46604	1.7097	1.6995	1.66805	1.13613	2.08682	2.19184	1.92542	2.06873	2.0834	2.27325	2.65861	2.18153	2.31512	2.42262	2.40106	2.41033	2.57146	2.53017	2.38098	2.34395	2.07149	2.11736	2.48186	2.3505	2.34207	2.37453	2.22086	1.99128	1.65876	2.05925	1.89779	1.9396	2.14431	2.25813	2.22095	1.61777	2.94723	2.21177	2.7063	2.75586	1.76294	1.8664	1.99583	2.20801
1572.16	2.36185	1.98538	1.02682	1.40596	1.21405	1.56154	1.59531	1.67218	0.883582	2.01957	2.13726	1.91167	1.9869	2.05462	2.24565	2.51853	2.27935	2.32413	2.39366	2.38066	2.40583	2.57444	2.40175	2.34545	2.38221	2.02168	2.08385	2.44586	2.27847	2.33744	2.33202	2.11873	2.02615	1.63033	2.05066	1.88703	1.88578	2.12342	2.19136	2.14984	1.61899	2.28015	2.28489	2.49247	2.75789	1.84565	2.20937	2.18592	1.82458
1571.15	2.16991	1.67119	0.977909	1.15294	0.950998	1.32785	1.42914	1.3992	0.754994	1.57258	2.10643	1.85748	1.9418	2.08807	2.12973	2.49942	2.30502	2.33083	2.39156	2.34184	2.38257	2.66367	2.49272	2.33505	2.46768	2.00655	2.07956	2.3659	2.18539	2.39432	2.21557	2.10391	1.97247	1.59312	1.9883	1.85169	1.83759	2.12303	2.17652	2.09809	1.38675	1.93186	2.0569	2.14162	2.78562	1.9605	1.9436	1.95467	1.4784
1570.14	1.68091	1.46162	0.787856	1.15966	0.782879	1.32972	1.3724	1.20476	0.939194	1.37657	2.08689	1.84621	1.87351	2.12728	2.13302	2.65731	2.26109	2.39365	2.40821	2.3118	2.33529	2.63481	2.5966	2.32046	2.42131	2.00309	2.08711	2.30831	2.10686	2.36967	2.19362	2.06059	1.94536	1.53866	1.96774	1.82139	1.83881	2.15867	2.15044	2.09105	1.34799	1.98878	2.23918	1.84575	2.55493	1.48382	1.63996	1.86587	1.3913
1569.13	0.973474	1.45176	0.932313	1.21545	0.872677	1.40193	1.31893	1.06792	0.874402	1.46749	2.08048	1.91098	1.90839	2.20338	2.18562	2.64615	2.26309	2.48531	2.50712	2.25736	2.3703	2.68175	2.67981	2.41763	2.4435	1.98731	2.13438	2.33154	2.0693	2.2946	2.22081	2.05921	2.0521	1.55965	1.98225	1.83391	1.81951	2.17841	2.16523	2.12585	1.26682	2.01563	2.02839	1.74532	2.62487	1.65225	1.28861	1.87706	1.84279
1568.13	1.0356	1.3287	1.06293	1.27064	0.922049	1.43509	1.3634	1.08838	0.573939	1.42331	2.12367	1.92831	1.9588	2.21064	2.2348	2.67124	2.30467	2.51312	2.57097	2.26159	2.45436	2.75511	2.72239	2.46762	2.33079	1.94576	2.12367	2.2939	1.97855	2.25102	2.23577	2.08859	2.09975	1.48517	1.92673	1.86993	1.81977	2.16334	2.15812	2.11177	1.16732	2.40372	2.02067	1.76358	2.48302	1.63365	1.3028	1.61347	1.70838
1567.12	1.42734	1.43932	1.22139	1.33272	1.05034	1.59864	1.34434	1.09093	0.860435	1.72106	2.17428	1.96518	2.05523	2.20538	2.29427	2.74236	2.30926	2.54666	2.61429	2.28977	2.53621	2.90055	2.76562	2.59269	2.30288	1.89953	2.10736	2.34113	1.89542	2.25969	2.27816	2.1398	2.06201	1.37484	1.87974	1.8909	1.8132	2.1859	2.22365	2.09558	1.16063	2.65079	1.79997	1.79598	2.48005	1.82889	1.63867	1.60294	1.62027
1566.11	1.91835	1.44107	1.36561	1.36316	1.05754	1.63077	1.50639	1.17437	0.975473	1.61941	2.14341	1.99343	2.06203	2.16119	2.3	2.72482	2.36609	2.54366	2.60049	2.37303	2.62672	2.86576	2.85757	2.61194	2.39042	1.90696	2.04743	2.35664	1.84572	2.23637	2.28278	2.09682	2.03552	1.3102	1.89839	1.91766	1.79322	2.19093	2.1691	2.08051	1.04252	2.28323	1.70799	1.84751	2.41513	1.96187	1.90003	1.58167	1.49985
1565.1	2.48661	1.57159	1.24743	1.14931	1.17582	1.50762	1.65558	1.01085	0.850101	1.36422	2.10124	1.98708	2.05654	2.19032	2.25864	2.74635	2.47726	2.59679	2.59593	2.44454	2.62611	2.91861	2.95015	2.64225	2.51132	1.89443	2.03909	2.28267	1.84099	2.2902	2.29297	2.11861	1.91304	1.30484	1.86463	1.93357	1.76987	2.18306	2.16598	2.05047	0.939275	2.18247	1.59042	1.95605	2.14286	1.75609	1.82891	1.45178	1.65737
1564.09	2.49355	1.57635	1.07576	1.04152	1.18426	1.32055	1.71755	1.07046	0.790457	1.39061	2.15101	1.94197	2.05061	2.24641	2.27984	2.82476	2.57119	2.68452	2.62507	2.45271	2.66983	2.90378	2.99332	2.70298	2.53943	1.90911	1.99578	2.24346	1.86019	2.30256	2.31895	2.11993	1.85457	1.37144	1.88635	1.93889	1.7747	2.18624	2.15209	2.02275	1.25332	2.38145	1.3874	2.18194	1.80614	0.902096	1.79113	1.44463	1.87226
1563.08	2.26654	1.62347	1.14768	0.994809	1.1915	1.34593	1.79627	1.29124	0.855095	1.62995	2.16935	1.96094	2.03668	2.33537	2.31505	2.80284	2.63325	2.73553	2.76068	2.41254	2.80424	2.89245	3.07454	2.74529	2.69159	1.89866	2.00646	2.23342	1.8069	2.32442	2.34985	2.14893	1.92336	1.51828	1.93424	1.96139	1.73825	2.18656	2.17311	2.03526	1.37102	2.34603	1.38104	2.1966	1.74693	0.492948	1.50374	1.68956	2.11613
1562.07	2.18517	1.53959	1.22514	1.08672	1.12831	1.24701	1.81752	1.55715	0.762685	1.74761	2.16952	1.88754	2.04356	2.34788	2.34212	2.91455	2.63228	2.76135	2.79457	2.47266	2.90235	3.01251	3.01515	2.77621	2.72374	1.8939	1.97337	2.17654	1.808	2.32399	2.37135	2.21394	1.90461	1.54996	1.96974	1.96054	1.75417	2.19766	2.22513	2.0229	1.40818	2.35396	1.62943	2.13157	1.68651	0.775671	1.39628	1.8987	2.16639
1561.06	1.61818	1.6691	1.55765	1.36524	1.14185	1.29915	1.7239	1.69235	0.980161	1.8536	2.12438	1.90649	2.08788	2.28971	2.34463	2.97671	2.62978	2.7564	2.80501	2.43081	2.94632	3.03201	2.96924	2.77442	2.64715	1.85805	1.95321	2.14352	1.70321	2.30808	2.36067	2.22406	1.84892	1.55329	1.96105	1.94247	1.723	2.20303	2.24	1.97737	1.27201	2.287	1.78532	2.07481	1.73426	1.01709	1.34487	2.20232	1.8832
1560.04	1.71709	1.54241	1.51507	1.57497	1.05008	1.35463	1.68307	1.67866	1.07414	1.55649	2.01418	1.87987	2.06811	2.25589	2.3252	2.93854	2.55718	2.76173	2.79919	2.40911	2.94423	2.99297	2.96837	2.64944	2.55011	1.84098	1.89141	2.10633	1.67763	2.2089	2.33057	2.17036	1.82504	1.48288	1.93146	1.89588	1.70257	2.20246	2.17093	1.96492	1.11732	2.16881	1.95904	2.07243	1.62176	1.18549	1.49262	1.95291	1.43612
1559.03	1.83239	1.63548	1.3952	1.35718	1.02808	1.25144	1.49266	1.37791	0.888929	1.32288	2.00205	1.86324	2.03308	2.22519	2.26601	2.84138	2.56241	2.76049	2.74457	2.384	2.82241	2.99933	3.01698	2.56305	2.47073	1.77663	1.88461	2.0344	1.60851	2.14137	2.31229	2.10461	1.65251	1.40498	1.88367	1.8498	1.6707	2.13566	2.15084	1.89301	0.997224	2.37007	2.05456	2.04487	1.59195	1.25693	1.29121	1.76191	1.46041
1558.02	1.90022	1.72233	1.31518	1.28419	0.790227	1.19566	1.41141	1.05547	0.680947	1.39379	2.12437	1.84055	2.07771	2.26677	2.26083	2.76143	2.533	2.73657	2.72588	2.29605	2.76751	3.00428	3.0681	2.59858	2.43692	1.79099	1.87044	2.02154	1.6118	2.12887	2.26909	2.07488	1.66778	1.37666	1.85154	1.83194	1.65753	2.07566	2.12737	1.86957	1.27511	2.62843	1.73509	2.21132	1.85298	1.11382	1.30397	1.68045	1.5638
1557.01	2.10914	1.72495	1.26403	1.27589	0.858542	1.31843	1.36918	1.06176	0.664365	1.58331	2.22614	1.85402	2.08097	2.2444	2.21458	2.66137	2.47562	2.68187	2.71495	2.19934	2.72395	2.95623	3.09976	2.57912	2.4655	1.76372	1.86161	2.02583	1.52163	2.10638	2.18317	2.04023	1.66879	1.41419	1.85074	1.79677	1.62457	2.05369	2.0844	1.83987	1.35916	2.60973	1.87207	2.32821	2.11067	1.44341	1.45633	1.73683	1.74621
1556	1.80611	1.48499	1.3232	1.22699	1.07469	1.25521	1.31387	1.23755	0.56964	1.62804	2.25843	1.80693	2.03893	2.21294	2.16284	2.57139	2.39111	2.62481	2.64792	2.20003	2.63922	2.93922	2.94037	2.57269	2.45935	1.75268	1.84147	1.99994	1.50428	2.09841	2.12289	2.00137	1.70256	1.39357	1.7791	1.73738	1.60286	1.98485	2.02904	1.81035	1.23137	2.19919	1.76887	2.37968	2.54943	1.82782	1.48462	1.70939	1.95575
1554.99	1.24792	1.39642	1.49158	1.35152	1.31357	1.41502	1.54407	1.41751	0.811868	1.84301	2.27058	1.84091	2.09833	2.18584	2.13782	2.53708	2.27527	2.51446	2.6135	2.15203	2.61829	2.81468	2.77845	2.47231	2.31942	1.71437	1.8286	1.98053	1.44346	2.09097	2.10936	1.97491	1.7146	1.42997	1.75739	1.67453	1.56349	1.94134	1.99013	1.79382	1.18735	2.26618	1.83618	2.31665	2.3686	1.73525	1.5748	1.55302	1.98333
1553.98	1.50005	1.41517	1.41267	1.47596	1.49338	1.43676	1.59475	1.45192	0.885231	1.77851	2.21367	1.80434	2.08963	2.1655	2.18007	2.50049	2.15321	2.43778	2.62989	2.07395	2.57402	2.75998	2.68057	2.31432	2.20885	1.71234	1.80242	1.95019	1.4583	2.08703	2.11822	1.94127	1.75946	1.34668	1.68753	1.61464	1.57398	1.94996	1.93239	1.80035	1.27261	2.32644	1.91719	2.27179	2.38852	1.29352	1.88377	1.43792	1.72982
1552.96	1.84008	1.56719	1.35767	1.33852	1.50784	1.35144	1.57916	1.26395	0.752746	1.74509	2.21085	1.79245	2.04417	2.23444	2.1946	2.35746	2.07564	2.37252	2.62197	2.0447	2.51095	2.72558	2.6384	2.22337	2.16754	1.70078	1.78969	1.84703	1.41145	2.0783	2.05675	1.87628	1.62072	1.27611	1.64266	1.59132	1.54302	1.91895	1.90747	1.75575	1.17558	2.30962	2.01669	2.25475	2.53646	1.03114	1.77719	1.45738	1.63828
1551.95	2.28802	1.82691	1.49353	1.38647	1.37661	1.30899	1.86362	1.16073	0.909489	1.89741	2.03795	1.79546	1.96177	2.29924	2.19897	2.30653	1.94236	2.31829	2.61917	2.01754	2.50028	2.74128	2.58163	2.20419	2.147	1.7344	1.75298	1.78603	1.41725	2.08218	2.00612	1.85697	1.57607	1.13606	1.59906	1.57075	1.51773	1.9084	1.90705	1.78893	1.17885	2.20756	2.05706	2.17921	2.55842	0.889153	1.82023	1.6602	1.51525
1550.94	3.05186	1.84208	1.59217	1.43055	1.43229	1.20985	1.69381	1.15499	1.03255	1.94586	1.98341	1.81399	2.00168	2.27437	2.19818	2.21686	1.89245	2.32918	2.6204	2.05881	2.43772	2.7409	2.58278	2.23608	2.29492	1.74965	1.7473	1.84444	1.40444	2.12659	1.97366	1.88003	1.59413	1.09372	1.61678	1.5767	1.52037	1.93455	1.919	1.75605	1.24878	2.05337	2.17365	1.95557	2.11861	1.04518	1.77309	1.69828	1.51746
1549.92	2.93433	1.44544	1.52473	1.34416	1.43282	1.08853	1.51995	1.16248	1.0273	1.60079	1.94357	1.74856	1.92236	2.22738	2.18966	2.11723	1.7671	2.32731	2.57516	1.98028	2.35283	2.69367	2.40379	2.19474	2.31763	1.73285	1.72421	1.86112	1.37691	2.14392	1.95949	1.83423	1.57526	1.09684	1.55618	1.54261	1.49118	1.85399	1.88434	1.74651	1.2966	1.6695	1.77089	1.87795	1.96032	0.978765	1.54355	1.54477	1.60736
1548.91	2.54305	1.27052	1.41977	1.33902	1.42816	1.23922	1.45693	1.15971	0.931876	1.52886	1.99357	1.71612	1.91073	2.17457	2.12851	2.1225	1.69022	2.24032	2.56744	1.90681	2.36399	2.54778	2.3436	2.15339	2.28587	1.69871	1.71989	1.89755	1.36659	2.13333	1.98007	1.8537	1.47736	1.16361	1.57573	1.50456	1.45331	1.81626	1.88904	1.70559	1.35576	1.79244	1.74931	1.9304	1.61249	0.981023	1.00288	1.05335	1.37451
1547.9	2.27094	1.41504	1.4152	1.39428	1.48557	1.3342	1.28289	1.0573	0.82243	1.36018	1.99205	1.63037	1.93286	2.08561	2.08964	2.06207	1.724	2.15223	2.47673	1.78622	2.18535	2.45649	2.22354	2.09998	2.16901	1.6411	1.70605	1.8812	1.29735	2.10793	1.92155	1.82365	1.39778	1.19998	1.52362	1.49048	1.42853	1.79584	1.82898	1.64405	1.38318	1.74148	1.48701	1.81445	1.59924	0.547945	0.955989	0.883159	1.31772
1546.88	1.377	1.52528	1.45936	1.2455	1.35315	1.43215	1.24248	0.929282	0.641128	1.31431	2.00717	1.58009	1.8912	2.13517	2.08722	1.87923	1.74706	2.09949	2.42509	1.75219	2.10716	2.45334	2.07877	2.09876	2.11871	1.60095	1.70256	1.77639	1.25242	2.08301	1.87608	1.82424	1.35542	1.29355	1.55503	1.49632	1.39944	1.77003	1.82403	1.58796	1.18402	1.63302	1.4416	1.80621	1.8108	0.720141	0.607954	0.694075	1.32591
1545.87	0.950786	1.64839	1.54591	1.14603	1.27314	1.42378	1.4479	0.889498	0.579445	1.43394	1.85791	1.59383	1.818	2.1516	2.03665	1.82097	1.72008	2.08163	2.38173	1.74823	2.03255	2.43347	2.04518	2.09306	2.00026	1.58103	1.6565	1.68272	1.16965	2.05206	1.79604	1.82103	1.31205	1.22406	1.54214	1.45551	1.37384	1.74292	1.81917	1.57209	0.673862	1.52215	1.19825	1.65112	1.93715	0.762482	0.690167	0.763569	1.36411
1544.86	1.37874	1.64542	1.44367	1.11127	1.19096	1.33805	1.52958	0.99135	0.759736	1.59678	1.84599	1.62626	1.89123	2.20539	2.0503	1.89314	1.79959	2.06768	2.45354	1.82987	2.05022	2.53638	2.07612	2.19534	2.1185	1.60773	1.67096	1.65861	1.14684	2.13935	1.82288	1.83968	1.44606	1.21073	1.5929	1.47169	1.42257	1.7444	1.85265	1.56826	0.707555	1.41135	1.42624	1.441	1.85355	0.818227	0.65775	0.746077	1.41375
1543.84	1.79724	1.45946	1.11895	1.05467	1.16576	1.17264	1.55053	0.976883	0.821243	1.54792	1.86995	1.62196	1.8343	2.19462	2.03372	1.94602	1.75886	2.05834	2.48363	1.81851	2.06437	2.69889	2.1004	2.23536	2.1441	1.623	1.63168	1.63381	1.14931	2.16831	1.84702	1.82678	1.51173	1.2451	1.63226	1.47409	1.48821	1.70039	1.82931	1.62099	0.864624	1.34742	1.4218	1.54396	1.8128	0.796377	0.802329	0.775048	1.40757
1542.83	1.92907	1.63504	0.90384	1.09193	1.09021	1.16784	1.34785	0.99018	0.551203	1.58516	1.88459	1.64615	1.82039	2.12948	1.99891	2.00062	1.73328	1.9706	2.48922	1.74968	2.14745	2.66449	2.15273	2.22547	2.15431	1.62465	1.62109	1.62535	1.17553	2.12559	1.87582	1.82315	1.52543	1.199	1.63962	1.46951	1.48235	1.70157	1.80327	1.63155	0.943583	1.31832	1.6783	1.72019	1.85198	0.641077	0.489079	0.570679	1.21785
1541.81	2.5603	1.6252	1.1614	1.21612	1.09441	1.17552	1.27562	1.01502	0.711451	1.55559	1.87464	1.62544	1.8028	2.11663	1.99388	2.04713	1.76427	1.94194	2.42087	1.69143	2.12171	2.58054	2.16456	2.2172	2.15073	1.62318	1.59159	1.6661	1.17064	2.07458	1.88071	1.85714	1.47953	1.21317	1.6665	1.46686	1.48415	1.6979	1.77428	1.66324	1.28923	1.20488	2.12171	1.70797	1.52904	0.346404	0.603138	0.649011	1.28031
1540.8	2.67026	1.61629	1.39499	1.18058	1.07055	1.27314	1.00989	1.15042	0.767117	1.53669	1.86414	1.60238	1.77524	2.07182	1.98931	1.94794	1.66056	1.94351	2.35944	1.64486	2.08993	2.51191	2.10709	2.15605	2.22447	1.63866	1.57722	1.65362	1.17901	2.00525	1.93724	1.90758	1.47958	1.20332	1.68777	1.42766	1.4483	1.6724	1.76256	1.64358	1.67154	1.31552	2.219	1.56601	1.66262	0.39505	0.53664	0.400439	1.3508
1539.78	2.42859	1.4404	1.62641	1.07858	1.25888	1.34731	1.07212	1.12383	0.756112	1.46024	1.78567	1.57901	1.74897	1.98112	1.9213	1.8756	1.51376	1.93094	2.30691	1.61411	1.95537	2.38814	2.03937	2.03542	2.17658	1.62682	1.56131	1.59909	1.14926	1.9412	1.90795	1.89999	1.32804	1.12806	1.65626	1.34086	1.37506	1.62878	1.71748	1.60223	1.64175	1.22978	1.79929	1.69928	1.89226	0.418967	0.583132	0.520318	1.4439
1538.77	2.24916	1.22739	1.51727	1.09689	1.3968	1.31193	1.33304	1.18458	0.908602	1.53545	1.68504	1.47381	1.74226	2.00524	1.83111	1.83831	1.43907	1.87227	2.22779	1.52578	1.91081	2.32033	1.8868	1.90229	2.148	1.591	1.52382	1.53783	1.09984	1.92512	1.85574	1.83568	1.3081	1.1651	1.60262	1.29054	1.31997	1.57802	1.6523	1.53325	1.66062	1.40167	1.81076	1.79939	1.86628	0.527821	0.672246	0.76786	1.32309
1537.75	1.66444	1.12942	1.26842	1.08791	1.57462	1.13271	1.33931	1.22543	1.02113	1.48401	1.55006	1.41017	1.66345	1.95217	1.73193	1.78081	1.44909	1.82893	2.16658	1.46273	1.80448	2.31761	1.726	1.84967	2.00916	1.47405	1.44884	1.44091	1.09445	1.88019	1.75094	1.72706	1.2383	1.21347	1.59407	1.25352	1.27757	1.518	1.5433	1.45521	1.66317	1.58739	1.53842	1.71887	1.84223	0.813087	0.961623	0.961213	1.062
1536.74	1.05807	1.25213	1.0689	1.09709	1.53769	1.12252	1.25419	1.15832	0.986627	1.66549	1.46559	1.37029	1.66536	1.83939	1.68103	1.79138	1.4654	1.74567	2.07932	1.4002	1.83217	2.22083	1.60339	1.75716	1.91993	1.37278	1.36817	1.4228	1.09902	1.77522	1.65939	1.65914	1.23656	1.236	1.58457	1.2078	1.18027	1.4718	1.49267	1.38725	1.45501	1.8344	1.31342	1.60125	1.64396	0.943029	1.03765	1.07969	1.06801
1535.72	1.47275	1.20273	1.05602	1.07043	1.22383	0.999663	1.45168	1.02638	1.0381	1.54476	1.38436	1.31242	1.61363	1.7961	1.66126	1.85812	1.61935	1.68521	2.0143	1.36712	1.8559	2.1319	1.6528	1.75053	1.8726	1.33426	1.31819	1.44749	1.15604	1.73697	1.71345	1.66745	1.25071	1.2221	1.66832	1.15878	1.16581	1.47453	1.46926	1.36117	1.41697	2.25628	1.6315	1.53263	1.46143	1.31262	1.12882	1.21314	1.1572
1534.7	1.75668	1.36852	1.07114	1.06801	0.98607	1.19406	1.22736	0.946655	1.0557	1.53175	1.38922	1.26747	1.60014	1.63922	1.63214	1.92921	1.58942	1.64597	1.94021	1.32408	1.7908	2.03617	1.65739	1.74745	1.84813	1.34661	1.28731	1.42371	1.12922	1.74076	1.71574	1.65016	1.24211	1.1544	1.63595	1.1241	1.15261	1.42911	1.44027	1.34177	1.62782	2.62412	1.78538	1.40836	1.71323	1.25568	1.23307	1.16277	1.15243
1533.69	1.7551	1.27976	1.33205	0.928716	0.849386	1.35516	1.31518	1.06556	1.04041	1.58637	1.4539	1.26718	1.54913	1.48282	1.62638	1.97701	1.50126	1.62019	1.93656	1.39441	1.74306	1.98808	1.74439	1.75885	1.84557	1.34714	1.27874	1.38301	1.12394	1.74589	1.72393	1.65295	1.3073	1.15987	1.60188	1.06485	1.16162	1.36305	1.39907	1.3619	1.87883	2.77467	2.06283	1.69547	2.02108	1.24371	1.22423	1.38149	1.27038
1532.67	2.28193	0.970594	1.4249	0.947863	0.934183	1.32687	1.25483	1.11449	0.965488	1.64135	1.40383	1.20471	1.44476	1.42851	1.56239	1.87009	1.3681	1.57349	1.88614	1.41461	1.69554	1.91884	1.74011	1.66583	1.8361	1.34967	1.22174	1.33996	1.0509	1.69027	1.65867	1.60825	1.33696	1.19724	1.48948	1.02545	1.166	1.30489	1.31948	1.31475	1.94816	2.53681	2.05781	1.59711	2.08271	1.20423	1.35653	1.51479	1.4049
1531.65	1.91945	0.919932	1.43033	1.01261	1.06918	1.20577	1.05802	1.27226	1.0755	1.37441	1.31763	1.17858	1.3698	1.38102	1.46454	1.72316	1.28026	1.57423	1.84435	1.42706	1.61364	1.90863	1.6986	1.68784	1.72937	1.3266	1.15727	1.25878	0.971531	1.6201	1.5712	1.45476	1.26838	1.16565	1.40707	0.982365	1.1101	1.23379	1.2186	1.27071	2.4573	2.50889	2.34542	1.35212	2.15673	1.23862	1.64154	1.55412	1.44943
1530.64	2.06936	0.848571	1.25736	0.991395	1.22092	1.05696	1.04094	1.20173	1.08451	1.30438	1.24835	1.14083	1.29888	1.33574	1.41766	1.6482	1.26128	1.56688	1.7959	1.39616	1.55102	1.88404	1.63552	1.66652	1.77109	1.24866	1.08068	1.28027	0.86234	1.43471	1.51451	1.38681	1.23944	1.12311	1.31545	0.925421	1.01168	1.1566	1.15651	1.19312	2.83337	2.33178	2.36126	1.27693	1.87416	1.17283	1.93369	1.32568	1.5794
1529.62	2.27423	0.917385	1.07741	0.884366	1.13852	1.02191	1.29882	0.942853	0.975194	0.999265	1.15106	1.06875	1.25637	1.30283	1.36696	1.49892	1.32727	1.51454	1.68531	1.29392	1.39761	1.86648	1.5011	1.59424	1.71212	1.18149	1.03616	1.25221	0.799827	1.30806	1.4788	1.30283	1.23533	1.0101	1.29038	0.838131	0.912942	1.11509	1.08814	1.08598	2.83603	2.10696	2.47643	1.62179	1.85034	1.2059	1.91274	1.26476	1.58784
1528.6	2.21058	1.14556	0.887551	0.768874	1.15012	1.2201	1.34653	0.761451	0.937708	1.17279	1.09323	0.989304	1.27606	1.23624	1.29148	1.50152	1.25605	1.44334	1.53502	1.16838	1.19107	1.80127	1.38241	1.53734	1.61434	1.07725	1.00767	1.16802	0.717229	1.2478	1.40765	1.25792	1.21802	0.843558	1.2397	0.798835	0.808672	1.02948	1.06823	1.01293	2.75384	2.09135	2.57056	1.72001	1.81453	1.21149	1.52198	1.17623	1.57472
1527.58	1.8741	1.18873	1.04694	0.685787	1.00346	1.14171	1.53316	0.711981	0.901327	1.44704	1.12506	0.931553	1.23837	1.15649	1.25852	1.48389	1.21042	1.32824	1.44934	1.15209	1.07519	1.62979	1.16343	1.4216	1.53229	0.982011	0.954628	1.06258	0.689157	1.18664	1.33856	1.19999	1.20034	0.780996	1.14593	0.751711	0.74866	0.952069	1.00177	0.954398	2.65612	2.12391	2.37737	2.16951	2.06353	1.32207	1.23243	1.14664	1.59288
1526.56	1.94043	1.08935	0.978919	0.754066	1.01783	1.05201	1.31698	0.722682	0.655722	1.41223	1.08935	0.841525	1.16796	1.05287	1.16549	1.33486	1.10583	1.22565	1.41724	1.12058	1.09317	1.53082	0.989346	1.27623	1.36664	0.913302	0.898868	0.980533	0.670807	1.14923	1.25717	1.12688	1.05521	0.700824	1.05159	0.724858	0.718337	0.882529	0.936041	0.869399	2.28911	1.9099	1.78037	2.24056	2.34503	1.54676	0.927439	0.928359	1.56638
1525.55	1.77793	1.10707	0.883399	0.889563	0.909023	0.939033	1.0773	0.685948	0.736394	1.19441	1.09233	0.845346	1.14869	1.01951	1.08144	1.19135	0.996985	1.17615	1.36214	1.13941	1.17957	1.41239	0.999053	1.25765	1.24121	0.907381	0.839731	0.927729	0.701591	1.15864	1.28414	1.0266	0.936398	0.62959	0.969141	0.711054	0.719874	0.845311	0.866374	0.847964	2.30622	2.25775	1.69614	2.19414	2.28207	1.44634	0.640845	1.09987	1.62814
1524.53	1.92359	1.20056	0.771989	0.805466	0.799529	0.762991	0.792124	0.690291	0.737061	1.03108	1.0024	0.837501	1.06633	0.976893	0.996018	1.15999	0.940007	1.10953	1.34323	1.03158	1.23701	1.30937	1.06203	1.20526	1.23377	0.884117	0.794062	0.930905	0.671256	1.08372	1.26847	0.951196	0.859922	0.601785	0.868358	0.695853	0.678416	0.781025	0.808721	0.812045	2.26869	2.22838	1.63949	2.02134	2.02662	1.41651	0.71581	1.08178	1.55556
1523.51	2.14063	1.11121	0.75587	0.804843	0.655725	0.817124	0.660842	0.569246	0.667442	0.770772	0.932403	0.822966	0.896994	0.928902	0.912865	1.01045	0.854939	1.02833	1.27594	0.991252	1.2435	1.23558	1.11491	1.14209	1.26816	0.845267	0.776794	0.920186	0.680623	1.04239	1.13017	0.855588	0.859311	0.594989	0.840028	0.624683	0.62441	0.721173	0.769613	0.78958	2.05988	1.97604	1.70877	2.02955	1.90517	1.29464	0.767682	1.18186	1.50829
1522.49	2.32329	1.21901	0.559532	0.565301	0.478934	0.749021	0.542087	0.53805	0.481622	0.679807	0.832455	0.795648	0.855092	0.853799	0.859572	0.943666	0.786421	0.947342	1.21039	0.974529	1.19881	1.14241	1.10797	1.08533	1.29448	0.795525	0.759334	0.868492	0.679663	0.998002	1.02844	0.852771	0.802841	0.560014	0.84319	0.578028	0.565777	0.689908	0.797998	0.727483	2.10685	1.91025	2.04612	1.81258	1.84245	1.19412	0.708915	1.21224	1.6318
1521.47	2.10334	0.835242	0.537792	0.363037	0.373374	0.466579	0.58219	0.632193	0.354187	0.475907	0.766218	0.692665	0.737116	0.78344	0.770611	0.856183	0.74625	0.809101	1.14614	0.966529	1.04755	1.11495	0.960469	0.969042	1.21396	0.730751	0.713147	0.793039	0.621946	0.959952	0.884611	0.755734	0.645357	0.543598	0.749967	0.521021	0.499453	0.672772	0.767394	0.640311	1.91909	1.86719	2.01239	1.77829	1.91814	1.13459	0.683599	0.936509	1.44821
1520.45	1.7281	0.701372	0.43084	0.371089	0.520619	0.368898	0.54203	0.703959	0.162704	0.318458	0.784808	0.608723	0.733222	0.739593	0.779175	0.806653	0.724657	0.775768	1.08799	0.983836	1.00995	1.09913	0.863747	0.931116	1.10279	0.655986	0.696245	0.738546	0.604005	0.939364	0.826972	0.663985	0.613514	0.540747	0.732332	0.48276	0.451759	0.624979	0.717653	0.573861	1.64422	1.71215	1.82821	1.82019	1.89862	1.00634	0.652685	0.788965	1.40516
1519.43	1.73128	0.823491	0.370623	0.577157	0.594233	0.258655	0.573063	0.755919	0.271639	0.358293	0.815029	0.585466	0.76515	0.726659	0.765468	0.74047	0.660909	0.768065	0.983811	1.00827	0.968879	1.04012	0.931574	0.90779	1.02782	0.60394	0.681346	0.700625	0.528308	0.923158	0.826003	0.610605	0.510392	0.465699	0.715329	0.457846	0.453177	0.590814	0.647494	0.582792	1.52177	1.52377	1.54912	1.81242	1.60052	0.706161	0.608472	0.916379	1.4489
1518.41	1.4245	0.872664	0.244869	0.684089	0.449354	0.262531	0.529227	0.742272	0.193226	0.314532	0.843828	0.599997	0.784816	0.747	0.746812	0.763008	0.546567	0.768287	0.944473	0.88434	0.915568	0.892983	1.01528	0.892568	0.970552	0.598148	0.69121	0.669474	0.428525	0.890019	0.813872	0.57353	0.490834	0.412274	0.66051	0.461731	0.434741	0.533313	0.597043	0.608089	1.55501	1.52655	1.44024	1.45223	1.54693	0.994634	0.785204	0.959784	1.48464
1517.39	1.3787	0.859512	0.317783	0.770028	0.32367	0.480148	0.54654	0.673705	0.162289	0.357609	0.873398	0.584064	0.766367	0.77619	0.734767	0.751573	0.439208	0.72975	0.865014	0.852378	0.778766	0.795565	1.00188	0.871171	1.05569	0.509689	0.711084	0.60441	0.441138	0.776793	0.778948	0.552738	0.511787	0.330684	0.652942	0.426197	0.411156	0.490118	0.519811	0.639339	1.50123	1.47862	1.10801	1.56135	1.407	1.0555	0.661363	1.04643	1.40393
1516.37	1.10268	0.869364	0.304313	0.738693	0.211783	0.642887	0.553016	0.676176	0.167584	0.550946	0.791097	0.555756	0.764119	0.741178	0.755137	0.726091	0.434806	0.663689	0.774177	0.721385	0.716127	0.667193	0.857113	0.760649	0.960206	0.465663	0.681265	0.543176	0.376547	0.638822	0.6804	0.56687	0.458953	0.260469	0.603741	0.408463	0.391946	0.480292	0.519481	0.592035	1.52418	1.57086	1.04457	1.46031	1.33878	0.842167	0.83277	0.787131	1.30002
1515.35	1.14889	0.454274	0.393868	0.472211	0.114696	0.55384	0.455566	0.688451	0.210359	0.385418	0.637589	0.468818	0.650887	0.688702	0.628125	0.661263	0.346619	0.497563	0.697101	0.571826	0.54762	0.678531	0.749764	0.61564	0.776011	0.402026	0.626001	0.480072	0.280895	0.568609	0.545362	0.500598	0.319125	0.208667	0.483583	0.345065	0.358263	0.443435	0.465842	0.488812	1.29558	1.53471	1.09707	1.07928	1.2139	0.71356	0.438726	0.282322	1.00681
1514.33	1.20893	0.497962	0.467921	0.456352	0.358814	0.555196	0.648539	0.65157	0.370849	0.471024	0.552685	0.452212	0.615815	0.647166	0.575298	0.643099	0.316162	0.490014	0.654517	0.566991	0.504039	0.685753	0.555067	0.586563	0.666805	0.364147	0.576774	0.462705	0.301223	0.529527	0.476416	0.456217	0.373549	0.237665	0.43572	0.313808	0.340585	0.420069	0.45318	0.423686	0.969713	1.34739	0.982681	0.988468	1.13421	0.354831	0.272847	0.0922345	0.9541
1513.31	1.56482	0.745185	0.545804	0.489399	0.545033	0.525846	0.568517	0.635053	0.564117	0.42375	0.463515	0.411778	0.587223	0.544976	0.491341	0.584328	0.326554	0.492357	0.59503	0.53481	0.478238	0.618192	0.586119	0.571296	0.53101	0.372057	0.497408	0.464613	0.282599	0.534079	0.394744	0.407578	0.319518	0.231183	0.340995	0.301395	0.309373	0.385921	0.398293	0.363827	0.692837	1.21626	0.645192	0.872285	1.14207	0.265406	0.316717	0.0717962	0.78067
1512.29	1.67835	0.644063	0.423952	0.493777	0.375534	0.402863	0.498402	0.44491	0.340665	0.159062	0.522755	0.437144	0.535467	0.508946	0.492682	0.623231	0.326686	0.500017	0.588495	0.58301	0.50614	0.571299	0.657135	0.579478	0.534774	0.451791	0.479348	0.454597	0.280566	0.585954	0.439676	0.396643	0.384585	0.224821	0.291801	0.317892	0.300105	0.386538	0.391386	0.335797	0.661555	1.32883	0.824754	0.605784	1.25448	0.650173	0.458775	0.431432	0.782302
1511.27	1.38224	0.59547	0.493012	0.479275	0.307351	0.559226	0.398522	0.399866	0.207055	0.305406	0.577587	0.416391	0.575756	0.54221	0.523934	0.666629	0.335969	0.527765	0.610717	0.562482	0.548563	0.540439	0.723589	0.622233	0.679181	0.453772	0.467208	0.437073	0.31006	0.551326	0.495059	0.416622	0.461851	0.185777	0.336507	0.318395	0.283663	0.401231	0.364625	0.363289	0.781957	1.33265	0.848048	0.838783	1.14746	0.75804	0.838386	0.919885	0.479587
1510.25	0.992679	0.166722	0.472464	0.456295	0.472286	0.492178	0.317182	0.240733	0.264098	0.618335	0.537743	0.37656	0.538041	0.510997	0.548213	0.652481	0.338919	0.45722	0.578315	0.470647	0.540649	0.518307	0.738337	0.590888	0.67618	0.43263	0.450051	0.429195	0.23911	0.489641	0.49844	0.371942	0.43807	0.165457	0.305796	0.289025	0.268006	0.374468	0.368469	0.421314	0.83445	1.57377	0.659065	0.670609	0.930606	0.707407	1.10376	0.752774	0.372649
1509.22	0.906764	0	0.581493	0.477998	0.485564	0.366063	0.117627	0.266351	0.390061	0.529676	0.469425	0.349778	0.439826	0.508063	0.490671	0.562751	0.309232	0.369476	0.551695	0.421339	0.470631	0.506246	0.673746	0.534453	0.699546	0.382926	0.462895	0.351321	0.177051	0.498563	0.396019	0.325887	0.364218	0.150012	0.304296	0.236952	0.270903	0.310238	0.36016	0.414369	0.75495	1.34118	0.805875	0.53666	0.84616	0.723393	0.761454	0.633282	0.360732
1508.2	1.3562	0.188823	0.638865	0.651427	0.536993	0.454811	0.392222	0.390359	0.377825	0.635603	0.452346	0.346703	0.418917	0.503302	0.467866	0.477658	0.26958	0.384274	0.518777	0.418789	0.495327	0.506156	0.62868	0.504403	0.687033	0.350723	0.437527	0.371778	0.174818	0.463814	0.379918	0.342379	0.318688	0.174482	0.357765	0.200866	0.291006	0.280264	0.385378	0.425309	0.740808	1.32847	0.774767	0.466429	1.01074	0.359573	0.569894	0.205204	0.286985
1507.18	1.29565	0.488032	0.693044	0.617763	0.627461	0.571299	0.365658	0.363627	0.344947	0.483841	0.418479	0.297283	0.40695	0.41674	0.398052	0.330628	0.346254	0.324577	0.458442	0.392161	0.437342	0.43041	0.635067	0.427505	0.550879	0.293718	0.339032	0.34959	0.115131	0.428827	0.297938	0.292982	0.215321	0.229897	0.253572	0.153691	0.233332	0.179422	0.31845	0.346193	0.526458	1.21058	0.567541	0.420578	1.0138	0.291899	0.277157	0.00786962	0.140078
1506.16	1.79248	0.645245	0.694288	0.580862	0.584408	0.501456	0.465088	0.369384	0.130981	0.276258	0.459381	0.291421	0.410407	0.388067	0.368736	0.312939	0.34208	0.321477	0.422275	0.444782	0.471735	0.444435	0.596226	0.402463	0.495435	0.327252	0.305967	0.378776	0.11433	0.407562	0.294283	0.25803	0.237223	0.199517	0.259581	0.18455	0.178184	0.179011	0.268666	0.271073	0.366168	1.07623	0.730803	0.150113	0.736611	0.355127	0.0272449	0.347456	0.258481
1505.13	1.49121	0.660553	0.59909	0.603973	0.384501	0.568995	0.485429	0.336737	0.105859	0.336088	0.417462	0.288628	0.421152	0.39893	0.36314	0.295073	0.336585	0.357635	0.40431	0.408442	0.48649	0.43652	0.517984	0.429363	0.535047	0.327026	0.280974	0.391558	0.121704	0.360241	0.254163	0.208941	0.238972	0.114387	0.285861	0.205571	0.148691	0.19569	0.244079	0.250285	0.418018	0.966753	0.831857	0.133031	0.665908	0.30659	0.201683	0.726253	0.428968
1504.11	1.1731	0.442574	0.40797	0.424339	0.412455	0.335311	0.418859	0.281836	0.169459	0.61465	0.324656	0.289844	0.395807	0.302223	0.311971	0.271686	0.26891	0.287601	0.374056	0.340406	0.420536	0.417142	0.448316	0.366139	0.48205	0.295895	0.26191	0.372439	0.115947	0.301619	0.215025	0.176524	0.149299	0.0972444	0.287267	0.197134	0.140808	0.168867	0.212541	0.240826	0.371843	1.20188	0.920142	0	0.686543	0.275303	0.161853	0.881129	0.649327
1503.09	1.05619	0.373054	0.30206	0.517444	0.426548	0.259185	0.466284	0.536907	0.325936	0.736089	0.298841	0.300622	0.374067	0.263815	0.280994	0.301255	0.241036	0.257568	0.349182	0.333083	0.382012	0.402156	0.485299	0.382853	0.52621	0.277947	0.323731	0.357266	0.113402	0.307367	0.219383	0.215471	0.158714	0.114016	0.287836	0.207344	0.155259	0.179635	0.226517	0.260799	0.429747	1.0705	0.842623	0.323102	0.700773	0.397198	0.04931	0.880483	0.855899
1502.06	1.43315	0.688878	0.274166	0.642591	0.357755	0.397219	0.70541	0.480353	0.290618	0.785648	0.321288	0.232391	0.327337	0.228329	0.248896	0.351346	0.135693	0.258549	0.31058	0.316748	0.363797	0.449545	0.560049	0.369414	0.543165	0.276202	0.337459	0.375356	0.175602	0.283274	0.318147	0.247657	0.125706	0.168807	0.297543	0.173623	0.200195	0.176446	0.211011	0.274854	0.564459	0.924536	0.8004	0.462176	0.874012	0.21312	0.169214	0.870335	0.597005
1501.04	0.854001	0.865043	0.233657	0.554673	0.473764	0.623007	0.811584	0.430916	0.390087	0.682618	0.379561	0.184843	0.243854	0.207657	0.191492	0.31449	0.184357	0.203224	0.282148	0.26482	0.286446	0.509281	0.591832	0.322553	0.492337	0.234816	0.302933	0.278475	0.200332	0.289703	0.286621	0.221812	0.0331524	0.207223	0.21612	0.12729	0.201626	0.123823	0.19284	0.250561	0.501871	0.614542	0.294328	0.487811	0.782305	0.192858	0.367593	0.646584	0.28889
1500.02	1.05193	0.853182	0.289116	0.482009	0.627497	0.663441	0.806371	0.418811	0.469938	0.562961	0.421205	0.149495	0.212791	0.228128	0.158051	0.340769	0.161325	0.237362	0.271615	0.278284	0.294548	0.467597	0.586302	0.360186	0.423479	0.236088	0.281315	0.268844	0.242711	0.303635	0.288647	0.225301	0.0767569	0.173462	0.177622	0.128147	0.163099	0.141235	0.204174	0.246809	0.590509	0.142551	0	0.599383	0.735992	0.32483	0.494959	0.472114	0.283637
1498.99	1.07723	0.590212	0.171128	0.50481	0.485957	0.72528	0.732696	0.319035	0.555491	0.448574	0.316293	0.100575	0.164421	0.241528	0.167921	0.251756	0.144585	0.225845	0.22887	0.287087	0.20522	0.394116	0.51725	0.355135	0.384906	0.208561	0.251295	0.241956	0.245545	0.267687	0.217745	0.142076	0.147308	0.0744843	0.147972	0.0902473	0.136246	0.147449	0.20517	0.23846	0.441444	0	0.0849984	0.674103	0.846455	0.45941	0.367748	0.170139	0.593803
1497.97	0.560057	0.54435	0.315317	0.595769	0.552321	0.839151	0.611702	0.415776	0.721959	0.586393	0.168419	0.0870845	0.134011	0.147638	0.129484	0.124141	0.0515834	0.135428	0.165869	0.18304	0.140103	0.210805	0.464127	0.202524	0.304304	0.153459	0.191315	0.17016	0.16557	0.226929	0.0548461	0.0948031	0.125461	0.028467	0.143068	0.0456143	0.0939463	0.0860651	0.182093	0.187571	0.291211	0.21194	0.243466	0.633071	0.599536	0.367879	0.410058	0.17601	0.514512
1496.94	0.269842	0.311395	0.48513	0.627761	0.587928	0.695494	0.416877	0.469662	0.608901	0.556141	0.132078	0.0921185	0.171436	0.0869918	0.125115	0.134447	0.0471378	0.0535306	0.130397	0.13445	0.143677	0.206725	0.407318	0.180448	0.266299	0.127137	0.21357	0.152691	0.0810903	0.233111	0.0420737	0.0870306	0.200301	0.00961158	0.07706	0.0459508	0.0297332	0.0770697	0.151412	0.195642	0.178756	0.478508	0.392349	0.475096	0.30408	0.272903	0.571678	0.0105784	0.359642
1495.92	0.00410686	0.317396	0.449762	0.41784	0.593699	0.460141	0.285231	0.163079	0.470809	0.390696	0.119907	0.070608	0.118352	0.0861875	0.0547521	0.127295	0.0153116	0.0562901	0.128253	0.0689067	0.124349	0.292151	0.32004	0.0733956	0.204184	0.0754964	0.203374	0.111047	0.0651654	0.213223	0	0.0205757	0.273654	0.0540561	0.058641	0.0191363	0.00848682	0.0473198	0.10936	0.148239	0.045295	0.505594	0.710875	0.240343	0.239272	0.066051	0.497396	0.442201	0.141735
1494.9	0.0584768	0.435659	0.426748	0.227542	0.592867	0.335724	0.137771	0.153514	0.360165	0.151287	0.224276	0.0718442	0.0957834	0.122764	0.07416	0.1772	0.0896608	0.0528247	0.141881	0.0433338	0.0516897	0.346708	0.286772	0.0292719	0.127515	0.0414245	0.157774	0.0526904	0.0894502	0.199987	0.00432853	0	0.177304	0.0628013	0.0701369	0.016546	0.0120212	0.029109	0.0736658	0.11665	0.0324106	0.696641	0.575567	0.0832889	0	0.149694	0.44921	0.447485	0
1493.87	0.632759	0.471006	0.334634	0.0240382	0.550834	0.106693	0.0900662	0.133961	0.330907	0.0991654	0.236159	0.0320766	0.0501211	0.143467	0.108503	0.192322	0.153106	0.0697269	0.115795	0.0812969	0.0694731	0.26208	0.286055	0.0221747	0.0932414	0.0275984	0.104464	0.0559787	0.105591	0.135774	0.075264	0.0520321	0.189531	0.0749194	0.0803057	0.0277632	0.00530322	0.0292902	0.0638272	0.0693	0.118706	0.429013	0.703115	0.22283	0.491139	0.324467	0.441147	0.309476	0.193407
1492.84	1.27485	0.2807	0.0586	0.0362203	0.391371	0	0.219757	0.0796456	0.0998519	0	0.19793	0	0.0202114	0.151939	0.111401	0.104312	0.144555	0.0512618	0.126837	0.12961	0.0829858	0.138725	0.267237	0.0117531	0.0518176	0.03543	0.0352974	0.100737	0.0883934	0.0824989	0.0795442	0.0340387	0.20595	0.0877621	0.118137	0.0338951	0.0642787	0.0466994	0.0580876	0.0386949	0.188064	0.542958	0.761286	0.323196	0.94123	0.480604	0.507223	0.134456	0.471853
1491.82	1.21698	0.569596	0.0799976	0.284361	0.217761	0.143237	0.363664	0.21222	0.228065	0.0827259	0.117053	0.0204395	0.0437575	0.0744208	0.0922498	0.0317851	0.0631356	0.0302621	0.105169	0.130086	0.115661	0	0.252378	0.0058044	0.0853846	0.0373207	0.00797797	0.0694561	0.0643374	0.0383109	0.0189243	0.0113949	0.147206	0.132875	0.0896013	0.0401649	0.102955	0.0196673	0.0456459	0.0302097	0.211528	0.8938	0.425401	0.514289	0.866167	0.241093	0.583762	0.33059	0.52119
1490.79	0.990453	0.601387	0.303713	0.547151	0.0434954	0.207476	0.410561	0.414646	0.237043	0.154588	0.118246	0.0620143	0.101767	0.048224	0.0823003	0.0424158	0.0733241	0.0339144	0.067369	0.140908	0.21895	0.066226	0.105687	0.0765175	0.106538	0.0518612	0.0370641	0.0375114	0.0860934	0.0743486	0.0481684	0.0673223	0.119634	0.114135	0.0646218	0.0607392	0.115557	0.0417558	0.0531863	0.0514022	0.188955	1.07786	0.193364	0.613387	1.08533	0.174707	0.820638	0.641108	0.338771
1489.77	0.497428	0.541497	0.243829	0.53471	0.019581	0.326871	0.43562	0.285891	0.299043	0.188658	0.0970395	0.10411	0.178648	0.0711418	0.0622017	0.0741572	0.0384947	0.0901465	0.053201	0.119452	0.179291	0.141765	0.0604155	0.0721127	0.0563992	0.05498	0.0594959	0.0250219	0.08592	0.0533484	0.0375552	0.0877105	0.0915217	0.137738	0.0845455	0.068547	0.0874616	0.0632155	0.06607	0.0788039	0.425682	0.766866	0.20485	0.804069	0.906115	0.273527	0.764073	0.958697	0.433571
1488.74	0.357009	0.768312	0.18726	0.428953	0.0621382	0.352994	0.363363	0.423217	0.213391	0.160374	0.139056	0.104857	0.231712	0.108117	0.0872854	0.20122	0.085383	0.0833498	0.0614127	0.112325	0.126119	0.159291	0.0477707	0.124957	0.0748095	0.0219261	0.0635929	0.0400373	0.0866124	0.0740882	0.0685826	0.127305	0	0.125891	0.10598	0.0613182	0.0760697	0.0638506	0.0454742	0.117408	0.484199	0.716908	0.104322	1.04199	0.469058	0.286949	0.51449	0.996671	0.528924
1487.71	0.387817	0.743061	0.291421	0.274154	0.215345	0.430398	0.306406	0.48277	0.257883	0.241021	0.0227739	0.063266	0.173771	0.101791	0.0826183	0.220331	0.0773436	0.0544254	0.0221303	0.0577585	0.101564	0.0661849	0	0.0831341	0.108593	0	0.0753895	0.0138641	0.0869902	0.0438938	0.109132	0.101992	0.0622937	0.120946	0.113278	0.0396091	0.0626167	0.0487558	0.0405751	0.0932494	0.213153	0.306881	0.361661	0.925751	0.562664	0.418216	0.349413	0.893861	0.537091
1486.69	0.329403	0.627142	0.249496	0.10912	0.4645	0.366817	0.26766	0.416938	0.00450091	0.28592	0.0510006	0.0774291	0.155915	0.119414	0.0855985	0.224527	0.0725291	0.106191	0.0344981	0.0997901	0.184909	0.165066	0.120904	0.0930466	0.138115	0.0283632	0.0944838	0.089779	0.132517	0.0864177	0.0975218	0.0869799	0.250878	0.121858	0.154446	0.0386997	0.113174	0.0687392	0.0537825	0.0839982	0.386564	0.491118	0.618853	1.04963	0.745726	0.491485	0.456306	0.775389	0.540998
1485.66	0.425231	0.872494	0.340194	0.17521	0.641633	0.34417	0.2838	0.569373	0.152286	0.29039	0.0153741	0.063416	0.151665	0.134836	0.0874327	0.187593	0.0737668	0.146584	0.0367286	0.0896059	0.24077	0.182081	0.287935	0.145014	0.175423	0.0684939	0.125307	0.0801482	0.193257	0.081797	0.11384	0.132054	0.361922	0.142799	0.174005	0.0385466	0.161234	0.0575384	0.0644781	0.124923	0.216833	0.765732	0.901279	1.1674	0.941588	0.472896	0.61819	0.632326	0.75715
1484.63	1.05351	0.814457	0.698433	0.510104	0.73273	0.465854	0.287791	0.702771	0.287342	0.397394	0.105509	0.0526717	0.14586	0.0856502	0.0466626	0.159946	0.081829	0.156998	0.0254388	0.0853649	0.244285	0.166064	0.397492	0.142482	0.200518	0.083883	0.14761	0.0692366	0.230894	0.139626	0.12995	0.183559	0.431274	0.152261	0.265813	0.0480746	0.174464	0.0813617	0.0982751	0.151764	0.143712	1.03147	0.896587	1.1351	1.34591	0.851352	0.996884	0.782383	0.825736
1483.61	1.48716	0.484874	0.560927	0.842608	0.73176	0.685047	0.411787	0.646538	0.244955	0.451244	0.135209	0.104139	0.138116	0.0694585	0.023766	0.266649	0.0362537	0.176256	0.0492697	0.138853	0.1741	0.194598	0.414178	0.158837	0.177484	0.163318	0.129125	0.0745003	0.276371	0.116258	0.145914	0.228258	0.385904	0.223817	0.346442	0.0778125	0.171192	0.13285	0.130028	0.159376	0.311979	1.11421	0.984823	0.896276	1.22051	1.11231	1.20616	0.731597	1.2802
1482.58	1.11074	0.379791	0.261394	0.862846	0.451294	0.579766	0.231159	0.55069	0.0766837	0.484494	0.126563	0.123127	0.120578	0.0831897	0.0280723	0.326022	0.111178	0.115988	0.0961305	0.0742803	0.163235	0.154864	0.363675	0.19847	0.184813	0.153768	0.105912	0.101941	0.236947	0.15497	0.140064	0.273922	0.310218	0.307684	0.386216	0.0921975	0.167909	0.181826	0.1197	0.176291	0.486585	1.2092	0.901837	0.855636	1.0414	1.08982	1.40134	0.707445	1.46744
1481.55	0.762714	0.22305	0.360779	0.75562	0.309368	0.583166	0.117937	0.480898	0.122659	0.440128	0.0819785	0.0928885	0.103948	0.0799307	0	0.296546	0.0951964	0.0790629	0.124863	0.121719	0.128703	0.0510287	0.288004	0.164303	0.122591	0.156184	0.103279	0.128528	0.243317	0.161269	0.206437	0.280242	0.347911	0.378625	0.404632	0.10402	0.165619	0.197317	0.1137	0.204813	0.501022	1.30141	0.98998	0.704468	0.924424	1.12817	1.45453	0.935419	1.46074
1480.52	0.540291	0.415981	0.404219	0.569745	0.334112	0.381903	0.0261552	0.465775	0.304251	0.525553	0.0982686	0.108062	0.122498	0.124824	0.0535365	0.315399	0.145371	0.135584	0.131067	0.180186	0.202428	0.113346	0.348662	0.211579	0.0993366	0.200329	0.134308	0.191858	0.334254	0.139091	0.290294	0.376827	0.392094	0.474047	0.40688	0.137041	0.20517	0.217895	0.121202	0.253845	0.942463	1.5165	1.48136	1.16091	0.83864	1.07144	1.50719	1.15086	1.50058
1479.5	0.188923	0.540492	0.37829	0.390141	0.410908	0.376753	0.121736	0.547451	0.595683	0.366233	0.0733721	0.0853337	0.191853	0.161047	0.112726	0.287672	0.227406	0.164954	0.124739	0.229413	0.282644	0.165257	0.423662	0.26144	0.185105	0.243912	0.148419	0.240761	0.343908	0.110376	0.421678	0.521021	0.386061	0.552177	0.396739	0.17413	0.244425	0.19164	0.174598	0.342533	0.913097	1.50853	1.82832	1.47347	1.2128	1.161	1.48391	1.29354	1.41416
1478.47	0.733725	0.576541	0.538573	0.26853	0.473128	0.366159	0.136896	0.343037	0.716932	0.361999	0.160945	0.0550088	0.240337	0.153689	0.133932	0.340147	0.213097	0.198402	0.119362	0.238535	0.308274	0.140135	0.464099	0.314634	0.284004	0.246884	0.225112	0.264151	0.417726	0.172636	0.473484	0.586852	0.502957	0.621599	0.441536	0.219863	0.295624	0.196058	0.245162	0.382595	0.884375	1.62601	1.62085	1.52478	1.62027	1.56696	1.36293	1.4989	1.46857
1477.44	1.04997	0.215255	0.36642	0.220331	0.483742	0.51882	0.370867	0.306242	0.394581	0.40691	0.214468	0.100266	0.218693	0.1738	0.155422	0.491919	0.192865	0.256196	0.121892	0.320144	0.366828	0.136651	0.51404	0.40057	0.421045	0.337248	0.235955	0.322737	0.470636	0.21585	0.533084	0.647097	0.511045	0.627811	0.507333	0.270732	0.380829	0.254955	0.344672	0.42688	0.768923	1.96285	1.55874	1.55246	1.83511	1.63309	1.27707	1.61797	1.78221
1476.41	1.20846	0.128536	0.301286	0.175207	0.269483	0.457177	0.196078	0	0.0480982	0.367409	0.253861	0.134993	0.223991	0.179814	0.218551	0.57145	0.284398	0.268261	0.110903	0.374668	0.385296	0.144605	0.490781	0.418836	0.435928	0.40541	0.272885	0.407438	0.481058	0.278979	0.558252	0.706896	0.555827	0.649703	0.56209	0.329628	0.455323	0.333742	0.39437	0.46446	0.822555	2.10267	1.65919	1.84226	1.83668	1.95749	1.44451	1.6809	1.88796
1475.38	1.42378	0.168515	0.48131	0.155052	0.265171	0.607878	0.292329	0.0683914	0.256235	0.373432	0.241516	0.114595	0.202255	0.185666	0.183411	0.57266	0.307333	0.292794	0.0956126	0.475425	0.423441	0.178126	0.452359	0.336019	0.3603	0.463791	0.299396	0.491029	0.580668	0.334268	0.550698	0.72028	0.655956	0.610572	0.63737	0.374806	0.489803	0.367451	0.431518	0.496263	0.824559	2.30279	1.75077	2.12303	2.08529	1.90857	1.53595	1.8307	2.36946
1474.35	1.57054	0.446726	0.64398	0.356063	0.196134	0.652958	0.526035	0.220267	0.558368	0.459239	0.295496	0.157693	0.146629	0.215592	0.185809	0.548831	0.330677	0.297173	0.0675586	0.559455	0.430294	0.252538	0.458474	0.302235	0.308465	0.524312	0.326213	0.478744	0.660774	0.326053	0.576407	0.771448	0.721572	0.711478	0.735108	0.423959	0.504024	0.401066	0.471487	0.498951	1.12742	2.33942	2.37538	2.71521	2.39873	1.94254	1.69688	1.9559	2.51958
1473.32	1.34249	0.291698	0.328969	0.43238	0.0731406	0.625766	0.574624	0.316801	0.625514	0.318418	0.329883	0.167464	0.168784	0.221667	0.229108	0.576528	0.425181	0.35021	0.0916162	0.619861	0.443978	0.402678	0.484176	0.299457	0.44046	0.54724	0.375807	0.551749	0.721719	0.385472	0.668932	0.83916	0.823292	0.831442	0.846574	0.485084	0.519474	0.441241	0.541182	0.502602	1.26572	2.61757	2.8947	2.74759	2.97549	2.19749	1.96677	2.00334	2.74791
1472.29	0.795444	0.313368	0.247116	0.549636	0.177126	0.615864	0.539233	0.418686	0.781891	0.352174	0.403473	0.135248	0.20359	0.200513	0.21125	0.590742	0.427145	0.376151	0.0839677	0.562739	0.45163	0.449811	0.501982	0.320977	0.428798	0.537998	0.447114	0.587647	0.775552	0.454265	0.723705	0.89211	0.957955	0.929967	0.893458	0.536092	0.5538	0.492059	0.581776	0.510398	1.54967	2.67423	2.81851	2.80284	3.22987	2.43159	2.22295	1.91682	2.9964
1471.26	0.613495	0.339964	0.201586	0.539879	0.287736	0.655739	0.373934	0.501674	0.754384	0.521429	0.442385	0.144211	0.169766	0.200667	0.227464	0.630515	0.475484	0.385947	0.140028	0.571355	0.460924	0.404879	0.654375	0.406192	0.468848	0.559475	0.47483	0.627536	0.800816	0.514349	0.839967	0.964675	0.974996	0.965185	0.9083	0.568395	0.585109	0.567806	0.621053	0.558204	1.36755	2.67581	2.86481	2.71323	3.19898	2.51024	2.41506	2.00405	3.05113
1470.23	1.00047	0.394841	0.267766	0.539751	0.451794	0.525955	0.308428	0.559531	0.750494	0.548267	0.419563	0.213474	0.199015	0.213736	0.263188	0.652506	0.528677	0.374092	0.191724	0.605157	0.473269	0.343963	0.65113	0.500162	0.412184	0.593398	0.502124	0.658251	0.770858	0.487455	0.887368	1.00987	0.955204	1.02704	0.891818	0.591315	0.637049	0.607149	0.606556	0.608081	1.05024	2.57747	2.74416	2.6931	2.79538	2.80196	2.56436	2.13969	2.9656
1469.2	1.16653	0.503294	0.359918	0.530472	0.674509	0.615713	0.391587	0.643098	0.880364	0.670532	0.303734	0.251657	0.171938	0.264646	0.260285	0.641429	0.524446	0.356024	0.198067	0.608568	0.513806	0.274287	0.686377	0.568026	0.398719	0.64738	0.517059	0.713105	0.754831	0.535886	0.907486	1.01706	1.00578	1.03651	0.912912	0.621051	0.674276	0.620591	0.641035	0.637086	0.778197	2.55033	2.63917	2.7554	2.65137	2.57924	2.68906	2.20519	2.91003
1468.17	1.35705	0.568599	0.542262	0.405229	0.838993	0.665207	0.754274	0.603591	0.899211	0.663511	0.36528	0.341123	0.175257	0.304075	0.258115	0.634861	0.461794	0.327214	0.196673	0.623604	0.560383	0.285832	0.70223	0.632689	0.519445	0.694629	0.549328	0.706801	0.720711	0.549086	0.942441	1.08892	1.09345	1.09838	0.970393	0.652169	0.69111	0.60542	0.655276	0.640929	0.809846	2.66125	2.60429	3.09248	2.6102	2.52871	2.33324	2.46393	2.8433
1467.14	1.43899	0.646356	0.648147	0.416434	0.916008	0.704577	0.83496	0.655219	0.808272	0.747018	0.374503	0.364722	0.229593	0.364756	0.332136	0.718542	0.516055	0.365468	0.210848	0.593392	0.561008	0.275839	0.631667	0.600958	0.696961	0.725801	0.612167	0.78337	0.762512	0.665086	1.01265	1.16231	1.11757	1.16167	1.05629	0.700171	0.714651	0.649833	0.697103	0.68767	0.988271	2.8524	2.64781	2.95031	2.71276	2.67939	2.14912	2.69822	2.92243
1466.11	0.955689	0.614722	0.751232	0.58563	1.01549	0.733137	0.81605	0.784652	0.772529	0.864761	0.432088	0.372747	0.280183	0.330087	0.291331	0.709172	0.55911	0.368718	0.178541	0.58799	0.549804	0.321353	0.536837	0.552671	0.775029	0.752721	0.630026	0.863103	0.739719	0.731694	1.03841	1.21837	1.13537	1.20748	1.09935	0.729356	0.716327	0.720483	0.753911	0.715098	1.41266	2.71986	2.50957	2.98191	2.74922	2.55079	2.05179	2.44936	2.98675
1465.08	0.714588	0.617074	0.600699	0.59762	0.828275	0.74336	0.6899	0.656047	0.625977	0.792318	0.434791	0.350981	0.228883	0.287788	0.263596	0.726602	0.618768	0.345792	0.170818	0.626688	0.51902	0.337133	0.496813	0.524799	0.748492	0.758707	0.636106	0.885239	0.746383	0.707398	1.0531	1.2108	1.08643	1.21446	1.12686	0.705323	0.713455	0.765349	0.804761	0.686561	1.54865	2.5482	2.26054	2.6728	2.5717	2.69536	2.14306	2.1839	2.87596
1464.04	0.348154	0.703456	0.645847	0.744942	0.915894	0.944891	0.835729	0.823987	0.765228	0.941659	0.389053	0.415245	0.276632	0.346715	0.287777	0.787925	0.627482	0.451026	0.231635	0.7126	0.56714	0.359711	0.539819	0.575659	0.724436	0.777331	0.660792	0.849827	0.757254	0.656442	1.08543	1.18529	1.09208	1.19478	1.15842	0.706496	0.756383	0.788875	0.821784	0.724209	1.45123	2.57018	2.27209	2.37946	2.43409	2.55207	2.36945	2.08225	2.75519
1463.01	0.889231	0.632443	0.596836	0.726973	0.756003	0.935766	0.775808	0.790476	0.60926	1.01228	0.406379	0.444319	0.364788	0.403427	0.32091	0.837163	0.672406	0.4438	0.220129	0.77915	0.597306	0.330598	0.682629	0.687628	0.683591	0.810184	0.678652	0.833607	0.774499	0.640136	1.157	1.16795	1.19329	1.17463	1.21112	0.747419	0.792403	0.817	0.834541	0.706285	1.30605	2.58178	2.44966	2.39707	2.20529	2.51481	2.46246	1.90027	2.56869
1461.98	1.30222	0.583481	0.681276	0.547783	0.713285	0.821391	0.785167	0.800216	0.718181	1.02848	0.514746	0.498637	0.445752	0.403635	0.359583	0.846492	0.673308	0.499306	0.240635	0.75496	0.727507	0.38519	0.767424	0.721374	0.696619	0.82224	0.723597	0.833446	0.819486	0.627016	1.20899	1.20659	1.24912	1.18851	1.19313	0.778481	0.793468	0.801559	0.837209	0.690235	1.21089	3.11223	2.71919	2.48213	2.02151	2.40809	2.17872	2.02984	2.39572
1460.95	1.44889	0.732545	0.912441	0.483285	0.820912	0.896107	0.675935	1.04047	0.946556	1.1091	0.590573	0.564304	0.470937	0.469014	0.419395	0.90797	0.759707	0.526061	0.262682	0.783793	0.762409	0.435167	0.831655	0.734844	0.720343	0.836144	0.805932	0.870442	0.889292	0.696536	1.29475	1.26291	1.22223	1.21933	1.16271	0.859851	0.821543	0.85435	0.848878	0.736875	1.05804	3.10506	2.70435	2.53868	2.14164	2.3678	1.84017	2.4925	2.43646
1459.92	1.40406	0.62193	0.921724	0.551531	0.799229	0.710328	0.63079	1.05806	0.969569	1.10926	0.715263	0.656841	0.527634	0.494337	0.446132	0.925874	0.805126	0.539518	0.327859	0.875138	0.802968	0.620947	0.914342	0.801802	0.859029	0.851069	0.836067	0.945335	0.952572	0.783357	1.32836	1.32885	1.26205	1.31652	1.19785	0.952041	0.871469	0.931451	0.888112	0.762933	1.1727	2.84478	2.74474	2.14766	2.14466	2.18081	1.69622	2.66489	2.17443
1458.88	1.0359	0.478128	0.675107	0.570898	0.652411	0.507761	0.708413	0.768664	0.936153	0.758901	0.754118	0.7358	0.470822	0.532848	0.491803	0.985968	0.815152	0.549012	0.372007	0.927341	0.818207	0.686963	1.05092	0.788611	0.947041	0.87522	0.85476	1.0334	0.968558	0.805271	1.35206	1.38893	1.29742	1.44443	1.30114	0.993809	0.91633	0.989938	0.952614	0.808871	1.41382	2.66459	2.12219	1.94282	2.32152	2.34661	1.77603	2.73073	1.99334
1457.85	0.790158	0.541887	0.681788	0.791862	0.789865	0.638051	0.993588	0.848528	1.16105	0.818087	0.77364	0.828829	0.389818	0.658038	0.596669	1.0739	0.84278	0.692151	0.444361	0.961751	0.856191	0.770284	1.23307	0.827556	1.093	0.942977	0.885571	1.08553	1.04635	0.891237	1.38141	1.48446	1.36976	1.52008	1.38748	1.07372	0.978765	1.03288	1.02904	0.895908	1.37562	2.45687	1.99436	1.92049	2.82428	2.13167	2.11212	2.61842	1.98561
1456.82	1.16636	0.431579	0.515508	0.871451	0.621714	0.65971	1.07864	0.752821	0.875681	0.695362	0.823275	0.808078	0.431607	0.7108	0.651448	1.14261	0.795149	0.725496	0.484106	1.02302	0.883884	0.766984	1.24631	0.886364	1.13024	0.984797	0.906179	1.08293	1.06827	0.914634	1.4437	1.55458	1.46274	1.58135	1.48937	1.10275	1.0099	1.05932	1.06419	0.933687	1.27081	1.99034	1.96504	2.04382	3.10835	2.02411	2.0325	2.04866	2.0333
1455.79	0.936616	0.540847	0.416679	0.750652	0.606746	0.697152	0.953897	0.738623	0.77611	0.706937	0.880487	0.824002	0.469565	0.695535	0.667643	1.15888	0.811036	0.77784	0.504075	1.00962	1.02555	0.702758	1.21374	0.890587	1.07968	1.05114	0.954648	1.09417	1.07351	0.887858	1.45791	1.63525	1.58895	1.57456	1.50285	1.12512	1.05288	1.04252	1.10824	0.944875	1.07995	2.39662	2.14408	2.33889	3.38842	2.18642	2.0166	1.81768	2.00422
1454.75	0.794398	0.787691	0.512263	0.609797	0.651363	0.826745	0.825546	0.857804	0.782887	0.814168	0.853262	0.809707	0.477439	0.656084	0.602699	1.18836	0.896108	0.770669	0.518996	1.07405	0.995381	0.585851	1.0617	0.901823	1.01133	1.08987	1.02408	1.12762	1.10918	0.913084	1.47423	1.64751	1.63614	1.56852	1.49138	1.14843	1.08723	1.04287	1.13254	0.98323	0.99696	2.85259	2.12913	2.7876	3.40615	2.26521	2.12952	1.70428	2.20679
1453.72	0.925535	0.977515	0.696942	0.567407	0.747102	0.866482	0.837686	1.03131	0.996476	1.08881	0.882562	0.848951	0.511361	0.60409	0.610776	1.28175	0.972407	0.801868	0.526138	1.17283	1.03128	0.641134	0.990397	0.986904	0.995305	1.15363	1.04083	1.18361	1.14997	0.942653	1.54393	1.70159	1.7127	1.59901	1.521	1.2168	1.15905	1.07896	1.16705	1.05614	1.17013	2.94185	2.35174	2.51068	3.10894	2.25797	2.09021	1.81511	1.96968
1452.68	1.3747	1.14327	0.848147	0.595075	0.75405	0.816022	0.921942	1.01389	0.963049	1.23139	0.890229	0.888682	0.541184	0.582852	0.628377	1.32517	1.05692	0.825493	0.516242	1.20678	1.04871	0.624782	0.998318	1.05301	1.05283	1.19833	1.05238	1.26378	1.23891	0.94979	1.64024	1.70744	1.74781	1.66843	1.58859	1.26083	1.17028	1.13665	1.20335	1.11225	1.39276	2.98311	2.14901	2.41497	2.8469	2.4623	2.09202	1.75779	2.07834
1451.65	2.06628	1.14049	0.913751	0.622859	0.855758	0.914427	0.96318	1.01759	0.995774	1.25715	0.934086	0.899351	0.523667	0.638615	0.686687	1.28934	1.16098	0.848841	0.528923	1.15703	1.00546	0.730022	1.139	1.13141	1.08374	1.23356	1.04362	1.29899	1.29073	1.07621	1.69772	1.72655	1.72587	1.6575	1.59606	1.29266	1.17679	1.17292	1.23945	1.16956	1.46418	2.79824	2.43943	2.24872	2.81134	2.29534	2.27265	1.683	1.98973
1450.62	2.50075	1.2308	0.870329	0.724135	0.864919	1.01797	1.00125	0.932473	0.8086	1.07517	0.994345	0.887654	0.64448	0.744583	0.802959	1.35901	1.16104	0.865651	0.579837	1.26488	1.01961	0.797706	1.32704	1.19718	1.17919	1.2541	1.05158	1.31253	1.34855	1.18751	1.72569	1.75911	1.85147	1.65176	1.64615	1.30147	1.21263	1.26216	1.30073	1.25061	1.62097	2.55336	2.62442	2.201	2.82152	2.09092	2.24707	1.56541	2.03291
1449.58	2.08508	0.99498	0.776674	0.644265	0.930558	0.99318	0.814779	0.937305	0.715432	0.766701	1.07618	0.950369	0.797007	0.799289	0.840861	1.44873	1.15032	0.874295	0.610564	1.21052	1.1756	0.895601	1.45732	1.17916	1.22561	1.26263	1.09942	1.24297	1.33137	1.20858	1.6887	1.7749	1.91491	1.62044	1.65618	1.29601	1.24872	1.31062	1.3198	1.24491	1.34353	2.68521	2.68418	2.51823	2.93228	2.22302	2.24376	1.61317	2.29682
1448.54	1.31432	1.00999	0.844014	0.695725	1.00426	0.885847	0.905765	1.00414	0.769508	0.714531	1.05602	0.95308	0.859481	0.81122	0.835149	1.47787	1.13466	0.866977	0.651373	1.16086	1.14128	0.865228	1.39535	1.0352	1.19911	1.20929	1.15227	1.24213	1.28145	1.22312	1.60378	1.68883	1.82261	1.62144	1.61604	1.27821	1.19715	1.30476	1.2881	1.18899	1.37218	2.80526	2.35683	2.62965	2.76823	2.33012	2.09111	1.63307	2.39674
1447.51	0.858427	1.06628	0.947188	0.676216	1.17398	0.903178	0.950781	1.21136	1.09537	0.834768	1.0559	1.0044	0.863618	0.806599	0.82078	1.55132	1.09858	0.903336	0.634839	1.11083	1.169	0.915359	1.26517	0.96714	1.14066	1.22736	1.18624	1.24628	1.23734	1.16252	1.5706	1.68264	1.71692	1.59659	1.59456	1.29498	1.15805	1.28341	1.27603	1.19295	1.42359	2.61489	2.0841	2.46389	2.64785	2.40783	1.90932	1.9584	2.43932
1446.47	0.684816	1.03758	1.06051	0.726811	1.07703	0.982897	1.10012	1.27301	0.850516	1.00822	1.02574	1.01049	0.888112	0.716388	0.768298	1.46086	1.0441	0.892055	0.596483	1.03479	1.10256	0.85902	1.17691	0.934135	1.10173	1.19125	1.15213	1.29116	1.2436	1.05757	1.49312	1.58392	1.60296	1.531	1.55449	1.29155	1.1419	1.20388	1.24564	1.09745	1.44108	2.64755	1.84302	2.27908	2.4784	2.39537	1.85323	1.93923	2.6471
1445.44	0.815153	1.0906	0.925004	0.665641	0.961817	1.07075	0.975362	1.00484	0.646735	0.970725	1.01335	1.04963	0.841771	0.741957	0.793644	1.37377	0.978933	0.847964	0.619573	1.03237	1.01912	0.870567	1.15519	0.956783	1.05047	1.21165	1.1552	1.33125	1.25144	1.08505	1.52458	1.54299	1.60022	1.4783	1.47427	1.29988	1.13435	1.15988	1.2334	1.10721	1.61662	2.34654	2.05232	1.9702	2.35349	2.14661	1.75659	2.00749	2.59951
1444.4	1.18376	1.34045	0.852283	0.767915	0.704625	1.06992	0.99049	0.947677	0.596075	0.883229	0.933536	1.11003	0.829101	0.815995	0.894988	1.35996	1.02808	0.841962	0.633071	1.20082	0.902668	0.831572	1.16751	1.0125	1.09121	1.21618	1.12664	1.36728	1.23546	1.10767	1.44683	1.54533	1.64294	1.40489	1.45872	1.34126	1.15422	1.16882	1.2661	1.15081	1.46206	2.28052	2.00294	2.1825	2.27381	2.05791	1.74269	1.85707	2.3305
1443.37	1.11052	1.15988	0.872935	0.688595	0.578409	1.01593	0.828839	1.00834	0.509098	0.704279	0.917602	1.1593	0.856423	0.830158	0.923561	1.40827	1.08104	0.882905	0.704677	1.24463	1.04264	0.893376	1.16968	1.05085	1.15394	1.23071	1.13845	1.32378	1.18295	1.1074	1.3798	1.53486	1.62049	1.4376	1.43128	1.35054	1.17129	1.1881	1.2689	1.19655	1.1269	2.29955	2.22904	2.37899	2.11439	1.99211	1.75442	1.83322	2.19886
1442.33	1.26201	0.936294	0.856617	0.583752	0.553005	0.893546	1.05591	1.00176	0.61151	0.794297	0.97616	1.15923	0.849509	0.872484	0.917097	1.44831	1.14795	0.936457	0.766919	1.20843	1.05593	0.844453	1.17008	1.04684	1.17775	1.22995	1.15915	1.31414	1.11658	1.1017	1.30378	1.47583	1.58523	1.41765	1.35552	1.37621	1.14319	1.18476	1.22871	1.185	0.946421	1.98335	2.14273	2.30918	2.14062	1.83634	1.65784	1.61111	2.2051
1441.29	1.42862	0.87723	1.05135	0.466793	0.787817	0.948915	1.11985	1.22821	0.963172	1.02712	1.07302	1.1837	0.919676	0.949285	0.932593	1.53892	1.22765	0.982917	0.784872	1.18771	1.11355	0.953449	1.23752	1.13442	1.11188	1.22466	1.17865	1.27023	1.12594	1.12078	1.26013	1.52268	1.43638	1.4002	1.34024	1.39471	1.13919	1.19051	1.19726	1.20681	0.862633	1.99469	2.10767	2.0173	2.38362	1.97386	1.78914	1.49882	1.86869
1440.26	1.4715	0.707033	1.0526	0.349788	0.926564	1.02857	1.25485	1.39542	0.88742	1.24834	1.14272	1.23723	0.923024	0.943376	0.92956	1.47782	1.26458	0.97532	0.840997	1.10378	1.07254	1.01782	1.37563	1.22363	1.05214	1.16931	1.14925	1.28374	1.1705	1.14126	1.19404	1.50508	1.37947	1.32265	1.32745	1.39042	1.19929	1.18625	1.19267	1.15204	0.952782	2.17369	1.91377	1.87506	2.48452	1.96375	1.75138	1.51541	1.66086
1439.22	1.28945	0.710813	0.950949	0.359576	0.907712	0.896648	1.12474	1.45698	0.814219	1.16065	1.21238	1.31619	0.94018	1.04127	1.00022	1.51077	1.27187	0.940791	0.904323	1.10397	1.12271	1.13945	1.39221	1.34313	1.09698	1.17506	1.17217	1.34084	1.26734	1.24518	1.27684	1.4665	1.35074	1.35059	1.30995	1.39516	1.21265	1.23958	1.2089	1.17373	1.24879	2.36852	1.75817	1.64521	2.5386	1.81856	1.81341	1.48581	1.64346
1438.18	1.06438	0.897735	0.931623	0.554311	0.963115	0.81802	1.09832	1.57488	0.893177	1.10803	1.22119	1.36672	0.935625	1.17086	1.07342	1.45822	1.25294	0.970541	0.955619	1.19847	1.07373	1.13598	1.34197	1.39328	1.11896	1.13681	1.21324	1.38902	1.22338	1.26652	1.27545	1.41527	1.29556	1.38516	1.27105	1.41556	1.16429	1.29944	1.26814	1.16762	1.05591	2.54483	1.21814	1.65353	2.34656	1.64613	1.56712	1.13799	1.58141
1437.15	0.946689	1.0018	0.998499	0.633231	0.943177	0.994662	0.946697	1.45521	0.754533	1.01592	1.23091	1.41924	0.989152	1.21079	1.10555	1.46645	1.22804	1.05154	1.03541	1.21939	1.2444	1.1644	1.34368	1.42496	1.25709	1.16555	1.25441	1.42075	1.1761	1.26038	1.28253	1.38112	1.39512	1.45153	1.24217	1.43541	1.15327	1.31931	1.29299	1.16025	1.00813	2.65147	0.901494	1.51465	1.90561	1.34405	1.20968	1.26441	1.78503
1436.11	0.826459	1.02445	0.999044	0.786649	0.934128	1.02728	1.15192	1.38593	0.891153	1.03056	1.24749	1.40935	1.04568	1.20695	1.1345	1.55536	1.21834	1.14308	1.03981	1.22988	1.27939	1.0716	1.34202	1.43837	1.36667	1.19445	1.27767	1.41421	1.1175	1.27367	1.25	1.3228	1.52441	1.39439	1.17204	1.44723	1.12474	1.30799	1.34475	1.17161	0.832187	2.37738	0.672759	1.36838	1.92227	1.06568	0.991728	1.06426	2.05382
1435.07	0.932588	0.929979	1.12436	0.983443	1.12993	1.18334	1.24989	1.28541	1.04264	1.20495	1.27445	1.40892	1.2098	1.20653	1.23067	1.59671	1.25812	1.16076	1.02947	1.23442	1.28231	1.07646	1.33758	1.46363	1.27126	1.19912	1.3146	1.36127	1.09431	1.28761	1.18867	1.28038	1.48524	1.3152	1.1202	1.46944	1.09978	1.27066	1.31666	1.10288	0.496461	2.15615	0.838132	1.24393	1.88954	1.21118	1.01196	0.746604	1.83261
1434.03	1.21874	1.03765	1.09688	1.02892	1.19059	1.30858	1.44987	1.33308	1.11012	1.40259	1.33204	1.43646	1.28353	1.17847	1.23206	1.59653	1.31907	1.16526	1.06059	1.22644	1.26992	1.19535	1.40768	1.45176	1.2978	1.19786	1.35548	1.36489	1.0765	1.26727	1.07711	1.25938	1.53062	1.16914	1.08643	1.47806	1.13124	1.25619	1.31943	1.10199	0.455323	1.96556	1.13932	1.31138	1.77433	1.39379	0.805832	0.817929	1.37313
1433	1.00977	1.02079	1.16981	1.05163	1.1794	1.2337	1.5451	1.39607	1.24218	1.20651	1.36591	1.44807	1.33237	1.18698	1.25136	1.66877	1.36087	1.11452	1.05806	1.23721	1.28611	1.15727	1.34475	1.4108	1.36793	1.15005	1.31593	1.36342	1.12239	1.22516	0.985607	1.1814	1.32311	1.10601	1.06003	1.45201	1.15539	1.2735	1.28467	1.12641	0.531363	2.08261	1.49592	1.32311	1.64858	1.48557	0.802566	0.805137	1.20113
1431.96	1.24706	0.921114	1.26666	0.926839	1.09699	1.10324	1.52225	1.4296	1.33067	1.18345	1.44893	1.45099	1.25157	1.22035	1.22102	1.55557	1.31187	1.09962	1.05721	1.24386	1.21125	1.07349	1.32577	1.31284	1.40586	1.1264	1.30548	1.39595	1.09849	1.186	0.918504	1.14919	1.08308	1.09006	0.98476	1.41866	1.12988	1.28826	1.25032	1.15298	0.686133	1.70073	1.56924	1.27315	1.66382	1.38779	0.838724	0.599493	0.958185
1430.92	1.56278	0.982777	1.26673	0.812665	1.04247	1.26793	1.40201	1.22888	1.40529	1.24987	1.4722	1.45682	1.16575	1.26342	1.21044	1.49553	1.24962	1.16867	1.09086	1.23797	1.18676	1.11011	1.29707	1.24359	1.47623	1.13882	1.26125	1.39755	1.02803	1.1761	0.908673	1.16103	1.05457	1.07566	0.941071	1.43059	1.12937	1.24432	1.20037	1.16689	0.875537	1.50826	1.50349	1.38072	1.42058	1.2864	0.685675	0.665769	1.09301
1429.88	1.45992	1.06338	1.19638	0.776954	1.01989	1.26958	1.40758	1.38562	1.48029	1.24053	1.48303	1.43266	1.09622	1.24373	1.20283	1.47306	1.24465	1.14954	1.06156	1.24474	1.19846	1.03823	1.27658	1.2821	1.48204	1.10814	1.21944	1.33768	0.988144	1.18922	0.874568	1.1143	0.915956	1.01085	0.855268	1.40944	1.07485	1.21413	1.22058	1.14925	0.828108	1.2345	1.40036	1.20952	1.43892	1.36854	0.559984	0.521554	1.42962
1428.84	1.95129	0.872225	1.04567	0.906032	1.1236	1.17691	1.16408	1.26013	1.26901	1.38012	1.49825	1.43353	1.0728	1.26871	1.2799	1.44759	1.25485	1.08144	1.0792	1.20524	1.22288	1.07375	1.236	1.34863	1.33909	1.09307	1.19525	1.31789	0.923287	1.16187	0.822845	1.00593	0.809274	0.88044	0.774536	1.42151	1.00819	1.18112	1.14539	1.03044	0.805609	1.35109	1.01545	1.29102	1.22103	1.39972	0.669854	0.436755	1.5637
1427.8	1.90346	0.968908	1.08624	1.00925	1.08556	1.0284	1.15714	1.29364	1.18971	1.29346	1.40884	1.4269	1.06031	1.25793	1.25553	1.45916	1.25903	1.07298	1.02107	1.24851	1.22703	1.24972	1.20336	1.40732	1.32014	1.02503	1.19392	1.28089	0.907323	1.14592	0.8011	0.962655	0.813956	0.797985	0.743587	1.40694	0.981703	1.16551	1.1118	0.971355	0.838461	1.51805	0.932961	1.15416	0.707818	1.13154	0.767206	0.30323	1.30928
1426.76	1.66662	0.902668	1.01045	1.0524	1.13258	0.884808	1.07529	1.01544	0.993938	1.10511	1.30278	1.40585	1.08237	1.26401	1.33204	1.37578	1.27123	1.02225	0.978201	1.22513	1.20875	1.18055	1.10887	1.38789	1.30662	0.918759	1.15864	1.21887	0.911224	1.06398	0.745541	0.826244	0.711066	0.722604	0.76379	1.36906	0.971463	1.17598	1.05773	0.908476	0.760556	1.8683	0.853028	0.838132	0.546584	0.944448	0.854078	0.250778	1.13903
1425.72	1.40142	1.0094	0.872192	0.997935	0.891872	0.707187	0.908541	0.984617	0.933266	0.993574	1.24775	1.32002	1.06042	1.20865	1.2823	1.19509	1.21293	0.952868	0.927596	1.23464	1.09447	1.18781	0.994944	1.3327	1.31441	0.845103	1.09041	1.18647	0.883029	1.02577	0.669564	0.74803	0.649779	0.675581	0.748838	1.27242	0.942105	1.13784	1.00101	0.867666	0.678521	1.63436	0.757895	0.523049	0.465994	0.650058	0.93465	0.167234	0.623061
1424.68	1.17001	1.18239	0.73777	1.05045	0.922703	0.830134	0.931027	0.996437	1.14445	1.14284	1.18341	1.25988	1.04331	1.19718	1.26869	1.13898	1.16101	0.941978	0.968896	1.22081	1.00569	1.18265	0.883596	1.26267	1.34391	0.825594	1.0117	1.1129	0.785439	0.965234	0.610719	0.7049	0.736401	0.678901	0.710298	1.1979	0.892285	1.05191	0.97141	0.852313	0.606329	1.51515	0.907329	0.621066	0.54055	0.832253	0.866315	0.141118	0.607126
1423.64	0.990291	1.3246	0.849539	1.01712	1.11826	1.01889	1.19927	1.48613	1.19653	1.2905	1.19011	1.20893	0.986516	1.10693	1.1622	1.06442	1.14873	0.85129	0.955493	1.11294	0.969539	1.0574	0.878832	1.24966	1.31501	0.753962	0.938176	0.99581	0.700565	0.910504	0.529283	0.609947	0.72645	0.667012	0.642936	1.08283	0.784694	0.98016	0.949579	0.799003	0.290538	1.00723	0.85401	0.638535	1.04936	0.804417	0.8153	0.113507	0.881622
1422.6	0.799106	1.10803	0.798356	0.866093	1.21622	1.00676	1.11063	1.6484	1.10406	1.58672	1.19031	1.12875	0.91636	1.05272	1.06493	1.06166	1.09409	0.799094	0.953693	1.00318	0.948363	0.991647	0.953387	1.18427	1.20946	0.745436	0.815893	0.947459	0.633517	0.790465	0.468262	0.544733	0.681504	0.520836	0.561832	1.00893	0.728363	0.89458	0.869126	0.722014	0.294171	1.00548	0.350958	1.02595	1.48299	0.975487	0.776018	0.33805	0.968086
1421.56	0.398546	1.06356	0.995641	0.807413	1.26897	0.999362	1.11404	1.67631	1.15753	1.54995	1.08979	1.04128	0.789742	0.95518	0.944686	1.04832	1.02016	0.761041	0.850096	0.91413	0.909353	0.943358	1.02794	1.05463	1.13439	0.653704	0.745563	0.820781	0.621453	0.75655	0.405407	0.521702	0.62632	0.46795	0.468127	0.928756	0.655655	0.831216	0.79487	0.652264	0.388732	1.06057	0.423698	1.25155	1.2175	0.948534	0.841386	0.319591	0.983478
1420.52	0.435669	0.834427	0.924391	0.710337	1.27255	0.924423	0.999389	1.30986	1.07574	1.61308	1.0143	0.960486	0.752224	0.980996	0.95532	0.978397	1.00505	0.748451	0.799567	0.867472	0.915602	0.932366	1.00505	0.950049	1.06608	0.629432	0.730045	0.796426	0.617456	0.751891	0.418315	0.458902	0.544234	0.432331	0.409309	0.886668	0.649979	0.799219	0.729172	0.615205	0.64944	1.24653	0.820211	1.408	1.22253	1.03185	0.661226	0.458805	0.941255
1419.48	0.345862	0.768467	0.736026	0.66343	0.886295	0.865818	1.00129	1.18076	1.24245	1.41327	0.918516	0.851938	0.740279	0.911386	0.864242	0.936242	0.929661	0.758119	0.740119	0.902908	0.865837	0.938487	0.885246	0.864957	0.942386	0.577402	0.697741	0.741695	0.607238	0.683	0.387146	0.442324	0.410402	0.443859	0.33497	0.831004	0.628296	0.775744	0.673493	0.515627	0.78725	1.34368	0.865697	1.551	0.637952	0.893652	0.408889	0.26032	0.689923
1418.44	0.972645	0.920287	0.915878	0.822244	0.649216	0.897015	0.948419	1.30161	1.21701	1.18227	0.764702	0.80085	0.674784	0.782952	0.808701	0.939803	0.802716	0.738038	0.684878	0.880622	0.869516	0.837745	0.727342	0.847935	0.906964	0.517589	0.628568	0.609667	0.517364	0.583702	0.324051	0.446886	0.458732	0.441174	0.284453	0.758904	0.583295	0.69317	0.617064	0.431314	0.866255	1.49185	1.13454	1.46789	0.628733	0.90708	0.146255	0.272693	0.641876
1417.39	1.00627	1.11838	1.03005	0.950803	0.805483	1.05178	1.12148	1.65794	1.09109	1.13272	0.678706	0.775598	0.604561	0.698002	0.702458	0.845759	0.777325	0.67744	0.660397	0.786484	0.809639	0.685584	0.543875	0.87111	0.81229	0.415602	0.578837	0.527534	0.374284	0.508117	0.322696	0.416592	0.542272	0.415363	0.224362	0.700059	0.5425	0.623126	0.567174	0.42389	0.571542	1.27446	1.15104	1.42928	1.00337	0.748018	0.344318	0.468562	0.769985
1416.35	1.09605	1.04781	1.10295	0.727801	0.951996	1.00395	1.27648	1.88939	0.874287	1.09406	0.57333	0.648011	0.531963	0.604252	0.509602	0.678383	0.701195	0.588107	0.602629	0.703661	0.666094	0.569247	0.441475	0.805082	0.737217	0.33676	0.467628	0.456951	0.226387	0.350101	0.25796	0.381842	0.544567	0.358907	0.208586	0.647325	0.48364	0.51188	0.509275	0.397683	0.381846	1.3181	0.97217	1.43906	1.51457	0.962977	0.608187	0.682398	0.73015
1415.31	0.84933	1.30134	1.2437	0.694348	1.20104	1.12688	1.31485	1.91099	0.995841	1.0457	0.571205	0.579653	0.393613	0.559241	0.462889	0.569278	0.690469	0.490057	0.533738	0.633278	0.623068	0.544442	0.458536	0.702584	0.779557	0.270658	0.44428	0.370169	0.141212	0.303073	0.201596	0.338135	0.495048	0.280499	0.222356	0.590803	0.400983	0.461724	0.468492	0.414337	0.394688	1.16167	0.869244	1.36865	1.53593	1.01736	0.836949	0.762869	1.06451
1414.27	0.609673	1.24226	1.21101	0.643962	1.35807	1.21423	1.29996	1.63953	1.31529	1.06623	0.526959	0.547816	0.377523	0.599571	0.436378	0.582214	0.695531	0.37458	0.484179	0.672475	0.559664	0.534596	0.413765	0.61644	0.79151	0.264124	0.420257	0.398002	0.149907	0.305009	0.257315	0.271007	0.49202	0.354053	0.268283	0.546127	0.366468	0.458886	0.440722	0.425177	0.405922	1.06033	1.32817	1.32787	1.42762	1.3178	0.96241	0.992458	1.29887
1413.23	0.699776	0.966088	1.00697	0.535855	1.17901	0.989489	1.15829	1.21327	1.49944	0.964006	0.538939	0.534444	0.356364	0.585835	0.386141	0.573168	0.724722	0.321133	0.427256	0.613346	0.512004	0.470319	0.459947	0.505187	0.715482	0.224469	0.390426	0.326661	0.180272	0.268418	0.22569	0.214836	0.372325	0.34226	0.28924	0.509541	0.348229	0.460302	0.422707	0.356403	0.487999	0.864776	1.18589	1.3385	1.05742	1.26528	0.965823	0.637018	1.20435
1412.18	1.31794	0.913821	0.991966	0.692704	0.916722	0.758909	0.756993	1.03005	1.42176	0.639182	0.4111	0.47244	0.392261	0.540498	0.416496	0.513184	0.628	0.257288	0.392837	0.590994	0.489481	0.391676	0.450555	0.445648	0.667832	0.180001	0.318877	0.205803	0.194337	0.27787	0.269023	0.220947	0.348122	0.3291	0.28689	0.45701	0.331528	0.433792	0.402135	0.270373	0.751781	0.967943	1.47559	1.3657	0.986624	1.12865	0.786379	0.583694	0.880636
1411.14	1.00756	0.639919	0.794865	0.815004	0.841531	0.681987	0.757975	0.909127	1.40071	0.734147	0.376295	0.460071	0.375434	0.544361	0.411219	0.530729	0.557141	0.265766	0.400184	0.516328	0.46497	0.341547	0.376039	0.478046	0.62336	0.18251	0.310756	0.18421	0.187441	0.31201	0.332253	0.229367	0.375252	0.297233	0.231155	0.43075	0.34894	0.427872	0.401136	0.225819	0.851724	1.39582	1.47734	1.57652	1.05089	1.23991	0.873009	0.468383	0.684174
1410.1	0.796825	0.906728	0.873199	0.874152	0.939688	0.624346	1.0205	1.08183	1.21014	0.871471	0.246035	0.364654	0.350228	0.462689	0.306884	0.466419	0.489893	0.292762	0.35653	0.374865	0.342308	0.279979	0.311302	0.543039	0.545045	0.176175	0.216044	0.13923	0.125638	0.266313	0.29192	0.232456	0.269766	0.346256	0.154597	0.411755	0.343039	0.377643	0.392005	0.210045	0.973406	1.66357	1.34084	1.49261	1.19959	1.21274	0.555871	0.530322	0.505179
1409.05	0.683681	1.26348	0.955477	1.01228	1.1336	0.810153	1.20975	1.1442	1.03028	1.29062	0.294291	0.330832	0.302494	0.379622	0.275725	0.487598	0.447256	0.375185	0.291833	0.334742	0.29177	0.34584	0.25499	0.529964	0.522221	0.168939	0.175719	0.156043	0.0867727	0.217481	0.291598	0.256992	0.327615	0.291191	0.125453	0.403394	0.356799	0.345946	0.372498	0.23091	0.769727	1.68472	0.90984	1.23031	1.14314	1.05669	0.329095	0.657609	0.773595
1408.01	0.699418	1.30703	1.02109	0.982424	1.18006	1.03058	1.31367	1.15191	0.912152	1.38639	0.27217	0.312483	0.230091	0.282441	0.230729	0.553765	0.402609	0.352326	0.232102	0.392483	0.222642	0.303764	0.265601	0.471575	0.507432	0.153854	0.128439	0.18687	0.108832	0.157788	0.302901	0.249569	0.432772	0.343694	0.105072	0.404394	0.36997	0.363721	0.366514	0.256891	0.516496	1.70796	0.913245	0.990028	1.10325	1.48804	0.403252	0.800195	1.15162
1406.97	1.31759	0.932291	0.793737	0.783714	1.05559	0.939498	1.1078	1.01129	0.534446	1.17623	0.351616	0.305238	0.155536	0.195337	0.200767	0.521021	0.443728	0.326668	0.196509	0.378449	0.194966	0.278488	0.24688	0.390857	0.515425	0.185541	0.0903807	0.199172	0.115208	0.094933	0.221063	0.225563	0.480979	0.267525	0.163915	0.40934	0.422644	0.333605	0.355885	0.283963	0.354825	1.26943	0.712866	0.762108	0.961785	1.22391	0.549755	0.724955	1.32428
1405.92	1.34209	0.613315	0.573552	0.606818	0.816109	0.820667	1.00153	0.898614	0.51324	0.692688	0.239693	0.28589	0.119519	0.209031	0.23116	0.422903	0.470823	0.257673	0.227874	0.448283	0.187607	0.285953	0.258808	0.346625	0.625242	0.227113	0.0624722	0.198257	0.149959	0.078417	0.2767	0.267295	0.516701	0.299581	0.18727	0.429162	0.465375	0.33269	0.381516	0.303571	0.486232	1.00878	0.967832	0.753801	1.02718	1.03723	0.557514	0.553146	1.36463
1404.88	0.893108	0.204783	0.531146	0.455705	0.709766	0.655055	1.09156	0.778247	0.424462	0.573583	0.125858	0.21331	0.0583423	0.208241	0.193901	0.436521	0.44108	0.21653	0.237646	0.462802	0.232998	0.300581	0.226802	0.328586	0.658984	0.260703	0.0885113	0.114133	0.165916	0.0913883	0.268897	0.278722	0.537041	0.340598	0.249457	0.428309	0.463327	0.348486	0.407341	0.292695	0.589514	1.1184	1.00526	0.868854	1.10645	0.765955	0.912558	0.592326	1.19115
1403.83	0.335447	0.49281	0.600592	0.3878	0.673264	0.548568	0.958212	0.779724	0.3939	0.592085	0.0628847	0.158388	0.111554	0.191262	0.165949	0.426225	0.472312	0.186667	0.281696	0.429763	0.325687	0.285577	0.198068	0.373096	0.673732	0.296359	0.077161	0.0542571	0.17488	0.0943791	0.251137	0.295106	0.490156	0.4653	0.277532	0.449041	0.500109	0.389864	0.447234	0.333897	0.866584	0.814821	1.05923	0.73215	1.19239	0.271395	0.837793	0.805857	0.995932
1402.79	0.372191	0.717746	0.626311	0.451022	0.947823	0.643697	0.856796	0.842366	0.373644	0.789732	0.112694	0.138101	0.182705	0.19614	0.177816	0.501509	0.58886	0.20554	0.301211	0.467177	0.433309	0.412492	0.306081	0.404372	0.724745	0.313183	0.124453	0.105223	0.208915	0.13826	0.268419	0.386715	0.629413	0.577545	0.345738	0.493507	0.526795	0.432897	0.506215	0.359654	0.802079	0.791008	1.01402	0.593555	1.27494	0.197933	0.576967	0.908724	0.988319
1401.74	0.873225	0.96258	0.91568	0.567614	1.0254	0.84248	0.883756	1.08606	0.688223	0.887384	0.163028	0.180887	0.259449	0.20301	0.263353	0.607267	0.69176	0.265146	0.37339	0.574271	0.553376	0.469074	0.439604	0.499503	0.841784	0.343097	0.168018	0.125033	0.316514	0.199659	0.398583	0.471251	0.597379	0.639963	0.436589	0.552211	0.608336	0.543058	0.590618	0.438071	1.01515	0.910126	1.05086	0.666711	1.26532	0.510725	0.629095	0.948732	1.25413
1400.7	1.57623	0.980527	0.886033	0.535761	0.878172	0.926073	0.839851	1.04637	0.96359	0.812998	0.270097	0.215518	0.304965	0.197802	0.329398	0.660899	0.805625	0.37749	0.388165	0.622657	0.634762	0.451207	0.506832	0.545722	0.945783	0.401472	0.253073	0.234815	0.416675	0.211637	0.441687	0.522954	0.603902	0.601136	0.4976	0.603928	0.693707	0.612968	0.638749	0.509393	0.942471	1.0034	1.05242	0.485496	1.09718	0.813727	0.654484	1.12287	1.01912
1399.65	1.39541	1.21469	0.840068	0.536386	0.682343	1.03655	0.955736	1.06968	1.13078	0.860182	0.294974	0.239774	0.276005	0.23474	0.357718	0.693596	0.87846	0.440641	0.403134	0.634868	0.652486	0.48883	0.562638	0.610797	0.932893	0.459926	0.256655	0.321328	0.465133	0.195168	0.441486	0.510307	0.561228	0.538707	0.436925	0.675313	0.741097	0.679113	0.65182	0.526873	0.713619	1.0398	1.06083	0.184832	0.948055	1.19782	0.810732	0.727093	1.02284
1398.61	1.37364	1.01568	0.687308	0.501946	0.517212	0.927968	0.901378	1.05196	0.831833	0.75959	0.317476	0.211376	0.354191	0.331796	0.381855	0.759079	0.891416	0.514953	0.436864	0.638522	0.696641	0.538427	0.630262	0.65038	0.850943	0.458315	0.317015	0.338944	0.477138	0.249905	0.443996	0.47422	0.514458	0.463118	0.453733	0.742583	0.734403	0.744205	0.674427	0.544848	0.351348	0.861831	1.05913	0.269502	0.927177	1.1284	1.09612	0.46874	0.900853
1397.56	1.21206	0.958097	0.560645	0.501312	0.408689	0.739979	0.748609	0.905666	0.501046	0.565401	0.361429	0.207895	0.460112	0.415993	0.381561	0.714644	0.839076	0.530621	0.479046	0.655648	0.706228	0.611297	0.661942	0.579082	0.809141	0.498214	0.335184	0.387827	0.478674	0.301747	0.380135	0.414982	0.56081	0.424224	0.369983	0.784309	0.732127	0.78654	0.692784	0.549469	0.339009	0.749666	0.933458	0.402408	0.901052	0.879698	1.24184	0.381251	0.843698
1396.51	1.21937	0.73625	0.39442	0.66377	0.45212	0.707842	0.884272	0.949015	0.0526612	0.488645	0.407002	0.203504	0.564243	0.504456	0.410124	0.731487	0.86251	0.527604	0.497019	0.686147	0.70551	0.702178	0.639448	0.514229	0.792137	0.587053	0.40358	0.484739	0.494581	0.375335	0.337206	0.37056	0.555408	0.325636	0.3128	0.86061	0.729077	0.785495	0.72001	0.53915	0.460443	0.838611	0.752502	0.551471	1.24291	0.860789	0.845802	0.118214	0.737631
1395.47	1.10217	0.860485	0.640466	0.78694	0.678044	0.823338	0.982337	1.01103	0.2444	0.612845	0.498237	0.253921	0.695706	0.537082	0.466108	0.843371	0.885415	0.528058	0.515568	0.824854	0.741284	0.741654	0.642904	0.562743	0.849538	0.672804	0.492865	0.526012	0.551946	0.46364	0.368652	0.399366	0.491478	0.287677	0.352918	0.918483	0.817809	0.846756	0.769514	0.598744	0.462309	0.893584	0.917379	0.659865	1.24167	0.621683	0.771349	0.332948	0.906982
1394.42	0.975149	0.802645	0.882918	0.800799	0.872228	0.787395	1.09519	0.791772	0.680533	0.74541	0.593265	0.34447	0.72756	0.565032	0.539928	0.870845	1.01416	0.557338	0.487172	0.842235	0.73161	0.704194	0.678491	0.595317	0.920866	0.757873	0.638558	0.557383	0.655913	0.467875	0.382777	0.406524	0.429378	0.285305	0.354174	0.970256	0.854375	0.877112	0.826735	0.627814	0.301614	0.944848	1.06176	0.618652	1.11996	0.938762	0.765046	0.694341	0.68587
1393.38	0.880762	0.954896	1.0966	0.670925	0.990384	0.909845	1.02954	0.833562	1.0912	0.956003	0.660797	0.44761	0.767302	0.558321	0.606442	0.962563	1.09779	0.604013	0.510341	0.921431	0.838754	0.749279	0.703735	0.67389	0.896937	0.892521	0.732438	0.622447	0.73333	0.508851	0.421205	0.417685	0.417308	0.377307	0.36803	1.06003	0.877971	0.969983	0.859627	0.633143	0.130296	1.23291	1.30575	0.603126	0.937374	1.15983	1.02731	0.776564	0.700193
1392.33	0.71713	0.784509	1.07787	0.479373	0.856212	0.793597	0.71097	0.739711	1.17711	0.79931	0.805363	0.536892	0.831853	0.65572	0.692326	1.02614	1.18164	0.662902	0.556537	1.00802	0.985574	0.79937	0.813306	0.773362	0.951623	0.952046	0.816909	0.682807	0.792873	0.616165	0.456225	0.471118	0.401746	0.488525	0.426984	1.13709	0.896458	1.02524	0.917305	0.668887	0.10677	1.1424	1.51378	0.670574	1.21489	1.08383	0.888776	0.590336	0.650567
1391.28	0.693602	0.677484	0.906493	0.33329	0.653872	0.571379	0.439937	0.549638	1.0095	0.331936	0.786505	0.574684	0.830494	0.68197	0.787026	0.966163	1.21365	0.762634	0.611179	1.00581	1.0106	0.834031	0.901045	0.780759	0.994341	1.01249	0.830289	0.723384	0.789309	0.742674	0.430774	0.519018	0.535566	0.581851	0.39957	1.16197	0.921228	1.08412	0.943091	0.659848	0.373705	1.23868	1.59785	0.585888	1.1149	0.863162	0.830719	0.52717	0.375284
1390.23	0.73567	0.606603	0.741542	0.460898	0.388947	0.442834	0.612729	0.372818	0.649298	0.249865	0.86853	0.590586	0.818681	0.787295	0.851763	0.978834	1.20128	0.875413	0.65578	0.972758	1.06117	0.874399	0.921049	0.847738	1.09444	1.05533	0.874501	0.774817	0.722743	0.81569	0.393589	0.546143	0.566733	0.545801	0.46877	1.19829	0.941015	1.09663	0.938032	0.648754	0.877233	1.1881	1.58468	0.762354	1.37055	0.747828	0.676519	0.135083	0.20061
1389.19	0.729312	0.638216	0.464771	0.336615	0.310736	0.211509	0.322138	0.170826	0.412474	0.204889	0.91735	0.562443	0.803889	0.851859	0.848948	1.05012	1.2076	0.888141	0.679562	1.01819	1.03377	0.936274	0.903787	0.880332	1.12392	1.00726	0.873332	0.729631	0.636537	0.821871	0.32044	0.511599	0.587959	0.456751	0.502995	1.17656	0.966391	1.08864	0.892887	0.644231	0.731853	0.780329	1.40296	0.863599	1.42393	0.575084	0.647856	0.528387	0.247932
1388.14	1.09578	0.591761	0.59632	0.321246	0.347373	0.259465	0.453624	0.051346	0.364674	0.122641	0.879215	0.595745	0.808842	0.94213	0.884621	1.1994	1.23799	0.916206	0.683903	0.954446	0.96775	0.964717	0.949751	0.90733	1.16914	0.94894	0.856126	0.669184	0.61393	0.757666	0.283458	0.505625	0.527523	0.380036	0.472306	1.15502	0.964565	1.05686	0.900027	0.645089	0.614446	0.495893	1.34636	0.92362	1.35768	0.805842	0.794206	0.43535	0.321532
1387.09	1.17132	0.74722	0.646465	0.374398	0.549711	0.470122	0.618423	0.428587	0.471634	0.355342	0.849336	0.673563	0.883364	0.969808	0.898083	1.40777	1.26769	0.980612	0.76832	1.07813	1.08892	0.989532	0.989009	0.976008	1.16406	0.942853	0.820998	0.685258	0.627731	0.757339	0.39972	0.57461	0.705848	0.445721	0.48112	1.14965	0.988165	1.09538	0.920032	0.647247	0.624309	1.20612	1.40231	1.25824	1.27349	1.01696	1.07789	0.34056	0.477215
1386.04	0.943569	0.80477	0.706255	0.417924	0.602812	0.593745	0.631	0.680095	0.376867	0.562551	0.88387	0.70551	0.947056	1.08676	0.883633	1.49724	1.27121	1.07611	0.831088	1.19234	1.18772	1.05265	1.06508	0.98391	1.16691	0.899574	0.780529	0.669006	0.612872	0.747504	0.470875	0.648968	0.669339	0.492388	0.471711	1.16475	0.98824	1.06012	0.935952	0.671853	0.729393	1.79474	1.36291	1.25986	1.52972	1.14626	0.824556	0.260714	0.851873
1384.99	1.08437	0.797672	0.527291	0.369966	0.500859	0.513351	0.597245	0.823657	0.37739	0.506952	0.867579	0.754938	0.971038	1.10129	0.970352	1.55508	1.31459	1.23183	0.898671	1.19824	1.25581	1.11297	1.22757	1.03482	1.16633	0.867757	0.746166	0.699392	0.603965	0.798615	0.587518	0.703192	0.784981	0.518952	0.442783	1.17124	0.992211	1.07845	0.982941	0.688708	0.994386	2.07528	1.19445	0.874256	1.31502	1.44254	0.69805	0.333032	1.00872
1383.94	1.20558	0.898977	0.741964	0.632345	0.547018	0.674788	0.785713	0.932768	0.579556	0.738671	0.991365	0.804032	1.02562	1.16263	1.0546	1.6155	1.37936	1.40186	1.01814	1.28141	1.4289	1.24811	1.61605	1.25962	1.30978	0.880966	0.777953	0.756119	0.599931	0.85875	0.721774	0.77025	0.775324	0.548745	0.606228	1.1889	0.983433	1.10628	1.02609	0.741222	1.19825	1.84529	1.11504	1.19343	1.25058	1.53067	0.904536	0.50219	1.1921
1382.89	1.46816	0.823663	0.712319	0.662247	0.612407	0.49695	0.499939	0.820244	0.861036	0.741025	1.20076	0.834532	1.11185	1.23134	1.14688	1.64832	1.56547	1.56023	1.09469	1.41079	1.54256	1.45486	1.80079	1.4045	1.37287	0.825458	0.782388	0.776365	0.62651	0.846174	0.775265	0.747771	0.725107	0.552782	0.713007	1.21679	0.948421	1.14015	1.04566	0.768112	1.05727	1.34329	0.878024	1.44948	1.1675	1.33998	0.776448	1.05469	1.20558
1381.85	1.37804	0.810152	0.865982	0.698048	0.683083	0.592944	0.563185	0.653853	1.01254	0.739414	1.25787	0.92858	1.18098	1.25667	1.28434	1.84372	1.79406	1.6978	1.17464	1.52423	1.71805	1.6167	2.00187	1.5974	1.45081	0.807847	0.823077	0.83983	0.614749	0.848041	0.79852	0.796832	0.643474	0.58837	0.754619	1.2924	0.973494	1.2028	1.0986	0.783944	1.029	1.14421	0.924492	1.37817	1.25349	1.26142	0.926795	0.893842	0.978868
1380.8	1.29364	1.00251	0.650542	0.653764	0.848854	0.676317	0.688131	0.647395	0.980292	0.863622	1.37439	1.06887	1.21367	1.31186	1.39017	2.12109	2.01811	1.93139	1.37433	1.77724	1.94747	1.79801	2.13275	1.87866	1.59734	0.88533	0.865869	0.882937	0.686808	0.869293	0.946338	0.902872	0.857971	0.702175	0.851903	1.37863	1.05174	1.2975	1.12914	0.834677	0.975823	1.16043	1.03343	1.39786	1.2924	1.04104	1.05004	0.897542	0.935007
1379.75	1.23927	1.05879	0.672049	0.6221	0.983763	0.737911	1.04334	0.711042	1.01388	1.0389	1.47823	1.17973	1.28019	1.47691	1.49192	2.3892	2.17481	2.31635	1.56699	2.02199	2.16814	2.00768	2.37984	2.10028	1.85011	0.942984	0.883003	0.89878	0.773587	0.936563	1.08921	1.05096	0.884509	0.899183	0.95481	1.51738	1.13632	1.38269	1.18089	0.890093	1.01711	1.23254	1.14598	1.29323	1.42123	1.1448	1.14145	0.855371	0.816832
1378.7	1.13144	1.17575	0.622477	0.662266	1.03185	0.739214	1.27344	0.76119	1.13629	1.0313	1.58886	1.28087	1.28131	1.65395	1.58237	2.70912	2.37402	2.68696	1.72848	2.23624	2.41688	2.09112	2.72901	2.33098	2.12821	1.0205	0.922592	0.926495	0.894279	1.01955	1.2474	1.16094	0.985051	1.05818	1.07589	1.63776	1.24483	1.44459	1.28613	0.974967	0.983515	0.970217	1.28056	0.815991	1.5687	1.42034	1.24735	1.09633	0.761687
1377.65	1.20786	1.145	0.869335	0.908559	0.953827	1.0971	1.27936	0.951851	1.28488	1.03247	1.65868	1.36429	1.35341	1.75722	1.62255	2.97457	2.56397	2.93444	1.91202	2.49494	2.63817	2.23141	3.07091	2.521	2.40616	1.10413	0.944511	0.971476	1.0245	1.10812	1.38569	1.27387	1.09391	1.18276	1.27136	1.72838	1.34915	1.48214	1.38992	1.07194	1.05941	0.756911	1.55327	1.10396	1.50489	1.56964	1.31732	1.11257	0.681078
1376.6	1.39733	1.04203	1.0603	1.08467	1.0413	1.18666	1.12518	1.059	1.39544	1.04036	1.85516	1.48925	1.51294	1.83489	1.76335	3.2351	2.82075	3.10442	2.03365	2.6015	2.84669	2.38883	3.25967	2.6945	2.61884	1.21094	0.973332	1.11344	1.17308	1.19408	1.56503	1.42255	1.29737	1.34625	1.50704	1.76662	1.41254	1.52917	1.4957	1.13632	1.03825	0.99238	1.8305	1.31111	1.66651	1.497	1.21487	0.898741	1.10661
1375.54	1.00761	0.931093	0.999783	1.02649	0.980103	1.03121	0.778937	1.09023	1.21421	1.06017	1.90398	1.57333	1.58402	1.82521	1.80366	3.34009	2.88422	2.99449	2.09696	2.67512	2.97746	2.42703	3.2127	2.70572	2.62238	1.2403	1.03218	1.2297	1.19926	1.218	1.65503	1.51732	1.44086	1.40406	1.59458	1.77894	1.43213	1.55821	1.52394	1.13093	1.09876	1.29496	1.7439	1.31891	1.61576	1.39278	1.23342	0.683103	1.28997
1374.49	1.42684	1.07234	0.816582	0.817459	0.902592	0.879724	0.586135	0.953218	0.963949	1.09544	1.91914	1.56187	1.53297	1.80304	1.80701	3.3281	2.73519	2.76416	2.11068	2.58791	2.87013	2.39315	3.00932	2.65213	2.46897	1.2218	1.05812	1.28497	1.29808	1.17669	1.74148	1.54766	1.60917	1.43656	1.65105	1.71019	1.42407	1.56622	1.5099	1.14239	1.24199	1.42244	1.56057	1.33828	1.56889	1.2202	1.10184	0.838818	1.58432
1373.44	1.73819	1.06364	0.888543	0.696849	1.03107	0.66018	0.794246	1.0322	0.854317	1.15631	1.93065	1.50087	1.4995	1.75848	1.82965	3.1518	2.46933	2.57892	2.01599	2.48853	2.73694	2.26728	2.87463	2.45514	2.26196	1.18228	1.03302	1.26028	1.35802	1.14229	1.7782	1.58324	1.64599	1.47382	1.63027	1.61247	1.39946	1.57613	1.47142	1.0984	1.56464	1.67796	1.57943	1.38201	1.46725	1.64405	1.45751	0.99778	1.34752
1372.39	1.50695	1.22046	0.918845	0.610509	1.04424	0.582488	1.01362	1.1915	0.887989	1.19114	1.9445	1.41522	1.44884	1.74656	1.74812	2.93451	2.20328	2.37482	1.93111	2.34927	2.65152	2.06253	2.68359	2.25016	2.05649	1.15601	1.06559	1.22757	1.42906	1.12599	1.77936	1.554	1.57137	1.48025	1.60328	1.53394	1.40654	1.53693	1.45882	1.07109	1.51551	1.89844	1.53393	1.35899	1.71712	1.63371	1.48738	1.15672	1.36856
1371.34	1.0398	1.27552	0.794451	0.526775	0.800372	0.704096	1.12018	0.989117	0.929229	0.927636	1.7839	1.31516	1.32814	1.65821	1.60542	2.65547	1.98232	2.19808	1.77598	2.19975	2.43626	1.91683	2.35791	1.98015	1.8495	1.06072	0.975361	1.1347	1.46095	1.05651	1.70894	1.48059	1.52301	1.40028	1.53289	1.43723	1.36842	1.45474	1.39878	1.04388	1.408	1.97303	1.66083	1.56617	1.87531	1.66325	1.35338	1.1511	1.30489
1370.29	1.20799	1.15002	0.86296	0.59745	0.722629	0.716821	1.09727	0.8578	1.02546	0.973337	1.65923	1.27797	1.34301	1.57342	1.60078	2.64474	1.88429	2.13386	1.73792	2.07915	2.25371	1.84172	2.17423	1.86282	1.83973	1.06437	1.00592	1.15931	1.48441	1.09633	1.76922	1.488	1.59431	1.45269	1.52624	1.37531	1.35514	1.41258	1.36791	1.06284	1.12137	2.27522	1.60044	1.66865	2.23159	1.61141	1.58331	1.05628	1.62428
1369.24	1.0927	1.13702	0.744163	0.649981	0.616603	0.641891	1.02645	0.686809	0.97676	0.791869	1.51297	1.2218	1.28348	1.49076	1.53225	2.54226	1.82258	2.03571	1.71264	2.04475	2.05654	1.72712	1.99451	1.71971	1.87054	1.02223	0.994249	1.16203	1.43848	1.08905	1.7808	1.49195	1.75379	1.37525	1.47124	1.36575	1.30148	1.36689	1.33598	1.07567	0.947806	1.92927	1.62152	1.50061	1.94172	1.45116	1.82752	0.904638	1.52658
1368.18	1.75397	1.13193	0.939508	0.883744	0.716128	0.667593	0.978968	0.462219	1.05191	0.865684	1.30408	1.09169	1.24178	1.43401	1.47878	2.38637	1.7893	1.96536	1.67441	1.94174	1.75378	1.66354	1.76916	1.5641	1.8012	0.973544	0.986008	1.17453	1.32285	1.05479	1.71182	1.47346	1.83977	1.40028	1.49989	1.31049	1.26195	1.31204	1.30307	1.06924	0.803155	1.45174	1.35994	1.37334	1.79593	1.44727	1.88614	0.715449	1.25357
1367.13	2.53715	1.0721	1.02319	0.956859	0.831445	0.743731	1.06266	0.52696	0.987186	0.89415	1.16015	1.03362	1.21777	1.3414	1.40887	2.2013	1.73816	1.8907	1.57163	1.84701	1.57902	1.56232	1.65165	1.43426	1.76521	0.965764	0.963398	1.14829	1.2539	1.00021	1.70783	1.50318	1.85146	1.34458	1.54059	1.27285	1.24992	1.30033	1.29043	1.03947	0.882067	1.355	1.51553	1.26223	1.78202	1.81842	1.82594	0.64724	0.89129
1366.08	2.45966	0.916299	1.04481	0.85429	0.821473	0.684782	0.932741	0.848797	1.07784	1.01727	1.113	0.981416	1.235	1.27797	1.3178	2.03171	1.69003	1.76581	1.49085	1.75472	1.58702	1.42423	1.50685	1.30434	1.7256	0.964835	0.983326	1.18387	1.26239	0.990837	1.74789	1.47464	1.80948	1.3555	1.57039	1.21117	1.25104	1.27177	1.26339	1.00608	1.1092	1.49861	1.64178	1.43439	1.84585	1.77491	1.53708	0.474388	1.00617
1365.03	1.62671	0.754314	0.790098	0.580961	0.731815	0.666359	0.906977	0.877178	1.00005	0.992446	1.04779	0.905259	1.11947	1.21172	1.21879	1.86321	1.60011	1.60373	1.33358	1.63006	1.53696	1.2617	1.36778	1.22319	1.60742	0.919984	0.913322	1.13735	1.30966	0.968345	1.66251	1.42848	1.71634	1.30822	1.58629	1.11485	1.1769	1.26633	1.1898	0.958857	1.27954	1.50617	1.63811	1.55572	1.9872	1.67458	1.38598	0.68545	0.968536
1363.97	1.49114	0.420218	0.70288	0.638324	0.820363	0.639643	0.684816	0.973655	1.26022	1.10121	1.00662	0.877374	1.10666	1.12927	1.15192	1.89017	1.49097	1.50454	1.28586	1.53623	1.51896	1.21174	1.36307	1.2341	1.51999	0.916641	0.962923	1.12617	1.34009	0.994165	1.67131	1.43371	1.68261	1.40243	1.60781	1.06461	1.15438	1.27266	1.16297	0.931903	1.53379	2.17313	1.60269	1.69178	1.80697	1.95727	1.43622	1.11929	1.30552
1362.92	1.60475	0.410177	0.625299	0.636731	0.847276	0.649264	0.706036	1.07942	1.05939	1.06674	0.992436	0.806619	0.969613	1.07292	1.06851	1.85148	1.40298	1.33461	1.24704	1.44334	1.39797	1.06916	1.29228	1.19402	1.42729	0.909084	0.912505	1.08496	1.32135	0.942509	1.60811	1.41792	1.69634	1.32783	1.61631	1.03818	1.11225	1.22733	1.10275	0.873126	1.61814	1.97111	1.3172	1.56206	1.32705	2.04849	1.51547	1.33271	1.37912
1361.87	2.45164	0.46622	0.931663	0.722644	1.02243	0.719339	0.984641	1.08838	0.990371	1.24156	0.830335	0.714932	0.872886	1.03185	1.0448	1.80371	1.31955	1.30569	1.24943	1.42509	1.31606	1.13812	1.11628	1.16686	1.26726	0.906044	0.867339	1.0431	1.21228	0.88881	1.55161	1.40686	1.6779	1.37835	1.63404	0.995241	1.09825	1.20231	1.05739	0.864541	1.54807	1.7101	0.96143	1.61863	1.29462	2.02481	1.77688	1.29846	1.78469
1360.81	3.06109	0.711085	1.03858	0.627558	1.07256	0.80104	1.23386	0.971872	0.853588	1.23692	0.697841	0.650669	0.772624	0.947415	0.951263	1.72011	1.16269	1.21193	1.19574	1.36248	1.2131	1.06669	0.951911	1.12467	1.16799	0.893675	0.804306	1.03737	1.16344	0.819137	1.54409	1.34482	1.60537	1.30284	1.62478	0.99074	1.04708	1.14708	1.02647	0.861524	1.62391	1.54952	0.803052	1.59103	1.27921	2.07543	1.67455	1.22583	1.72344
1359.76	3.40103	0.817743	1.10815	0.582588	1.08069	0.672721	1.2079	0.898149	0.889247	1.00269	0.667615	0.61668	0.781756	0.927092	0.893459	1.61593	1.12671	1.17286	1.12456	1.29982	1.12599	0.995343	0.92152	0.965218	1.11941	0.790615	0.76748	1.00135	1.13803	0.803248	1.54249	1.25761	1.67718	1.29467	1.55728	0.968599	0.98161	1.05394	0.971517	0.874245	1.9485	1.37519	1.43207	1.70007	1.18175	1.78084	1.62385	1.14554	1.89998
1358.7	2.52836	0.800442	0.821281	0.441381	0.751951	0.505748	1.01944	0.723606	0.776304	0.806918	0.66525	0.58357	0.80718	0.88401	0.858587	1.49476	1.11847	1.10332	1.0534	1.24422	1.05724	0.871061	0.916605	0.844146	1.06474	0.732438	0.715208	0.989162	1.23511	0.80982	1.44418	1.14962	1.62281	1.22948	1.4038	0.900404	0.889175	0.99619	0.963207	0.859492	2.15376	1.38887	1.71144	1.62169	1.4581	1.61803	1.55761	1.12602	1.64169
1357.65	1.35226	0.776063	0.64633	0.557941	0.656393	0.408518	0.802277	0.693139	0.840066	0.56767	0.695447	0.628426	0.781051	0.877544	0.798828	1.4339	1.1771	1.10649	0.991255	1.14704	0.981507	0.853606	1.00043	0.765475	1.02426	0.645893	0.727472	0.968784	1.33689	0.808995	1.37356	1.06145	1.58923	1.19451	1.27991	0.843449	0.851422	0.93972	0.976197	0.818956	2.17133	1.96764	2.35832	1.76799	1.56687	1.82611	1.35973	1.4641	1.55021
1356.59	0.392067	0.722114	0.64198	0.563731	0.493451	0.295602	0.495561	0.69007	0.477321	0.571548	0.716353	0.588916	0.67129	0.856993	0.72478	1.31483	1.08193	0.992032	0.931121	0.996946	0.884665	0.702458	0.942018	0.618357	0.940006	0.576029	0.692596	0.930441	1.40686	0.756067	1.24017	1.03896	1.51682	1.0923	1.20639	0.786366	0.801661	0.880651	0.915189	0.70899	1.88514	2.39598	2.30548	1.64233	1.59925	1.87654	1.60169	1.58778	1.58227
1355.54	0.14004	0.771774	0.705762	0.567246	0.50643	0.311341	0.68549	0.633103	0.327207	0.788846	0.564017	0.544552	0.555123	0.817518	0.708826	1.26004	1.08515	0.962568	0.903045	0.935908	0.898095	0.747187	0.830885	0.604838	0.827342	0.582765	0.630746	0.911753	1.35685	0.725167	1.17929	1.03687	1.41427	1.02409	1.1926	0.736516	0.792142	0.883564	0.884903	0.666921	1.65383	2.89441	2.61587	1.99614	1.81011	1.96397	1.91095	1.69362	2.00658
1354.48	0.378397	0.901199	0.859242	0.501412	0.730874	0.498353	0.757744	0.487057	0.428742	1.07367	0.471023	0.521945	0.445637	0.744889	0.635266	1.20156	0.985353	0.873	0.8293	0.859882	0.863534	0.615369	0.72774	0.600021	0.716446	0.621492	0.599755	0.887039	1.24888	0.671299	1.14881	1.02254	1.26041	0.923776	1.15866	0.710076	0.736495	0.856091	0.815571	0.638541	1.78811	2.94879	2.37112	2.0394	1.88082	2.06785	2.1127	1.84973	2.00954
1353.43	1.28764	1.0404	0.988067	0.461948	0.842796	0.574707	0.762742	0.341296	0.577464	1.01343	0.480593	0.504419	0.452829	0.657168	0.560648	1.1123	0.907629	0.801983	0.762477	0.7784	0.76756	0.648699	0.713568	0.54893	0.650083	0.605633	0.546317	0.79714	1.14529	0.62629	1.13841	1.0247	1.199	0.872202	1.11446	0.72693	0.716083	0.812122	0.785988	0.62299	2.30635	2.6422	2.54595	1.93482	1.67227	2.18764	2.51914	2.06638	2.2189
1352.37	2.39878	1.20953	1.07567	0.387023	0.789876	0.712094	0.890921	0.391378	0.822508	1.10893	0.541485	0.468873	0.427818	0.559369	0.478373	1.03054	0.838348	0.729633	0.713298	0.790998	0.68082	0.630422	0.682226	0.450423	0.643775	0.643034	0.531686	0.777436	1.08623	0.578314	1.05521	0.935486	1.06184	0.819372	0.997675	0.660484	0.695967	0.767928	0.734298	0.632066	2.46799	2.43539	2.56817	1.94854	1.59415	2.29689	2.62223	2.14502	2.51104
1351.32	2.37051	1.26963	1.00435	0.600246	0.814667	0.728517	1.08014	0.537787	0.954317	0.963741	0.621379	0.45004	0.372708	0.537523	0.475505	1.01405	0.863973	0.658084	0.650751	0.770164	0.604403	0.621863	0.727004	0.432727	0.724892	0.629093	0.550773	0.738755	1.10593	0.548697	0.975561	0.859779	1.03684	0.882685	0.950824	0.687801	0.688785	0.727832	0.71802	0.640656	2.53998	2.3871	2.53923	2.32717	1.71864	2.3295	2.39548	2.12405	2.81154
1350.26	2.2546	1.13953	0.898714	0.615563	0.749928	0.612789	0.765969	0.590175	0.938055	0.930607	0.585928	0.398321	0.403091	0.491313	0.48287	0.953489	0.847633	0.610475	0.592269	0.758377	0.631063	0.535364	0.642681	0.418997	0.696941	0.630601	0.560482	0.67387	1.08275	0.561987	0.872544	0.814269	1.0658	0.923053	0.928748	0.66308	0.67995	0.694453	0.673723	0.554056	2.47601	2.89376	2.44829	2.31977	1.90208	2.56123	2.54757	2.0676	3.24972
1349.2	1.71417	0.682705	0.518523	0.594531	0.524029	0.373561	0.603237	0.452604	0.692058	0.56417	0.496781	0.329049	0.423377	0.439194	0.469613	0.848341	0.822865	0.522665	0.486935	0.735267	0.585615	0.494639	0.528555	0.38783	0.546138	0.611446	0.529619	0.629411	1.06908	0.544647	0.713231	0.705466	0.884461	0.838091	0.858473	0.604995	0.657607	0.654473	0.647322	0.498012	2.34454	3.02052	2.51664	2.5519	2.14585	2.45561	2.40613	1.99047	3.35899
1348.15	1.38427	0.401132	0.294959	0.533971	0.397982	0.29631	0.336069	0.293602	0.633986	0.382491	0.430676	0.331572	0.355343	0.353978	0.430927	0.786919	0.729005	0.449683	0.409437	0.642024	0.511083	0.414942	0.425545	0.389685	0.481498	0.561822	0.523494	0.586576	1.06663	0.494961	0.602368	0.663482	0.692406	0.724603	0.763618	0.557147	0.587053	0.621077	0.562982	0.423621	2.2634	3.08683	2.29997	2.69526	2.4452	2.32875	2.50739	2.19338	3.11616
1347.09	0.766865	0.193438	0.126625	0.318315	0.263785	0.141305	0.0541475	0.219555	0.462035	0.345619	0.303483	0.305519	0.394514	0.334402	0.346786	0.785826	0.679099	0.36533	0.359576	0.631875	0.501808	0.400983	0.408169	0.422062	0.432777	0.508069	0.534486	0.582044	1.08499	0.494579	0.553042	0.627684	0.628057	0.54672	0.689468	0.506177	0.552491	0.599583	0.507945	0.401785	2.25457	2.9483	2.28534	2.77898	2.4998	2.52245	2.69835	2.38811	2.68878
1346.03	1.23044	0.419508	0.190958	0.0837387	0.393149	0.110091	0.179635	0.268029	0.248953	0.498451	0.303091	0.269876	0.300573	0.314853	0.285222	0.724394	0.585761	0.323503	0.334494	0.57993	0.462002	0.390839	0.294122	0.341716	0.44172	0.456032	0.557229	0.630069	0.973193	0.48508	0.432887	0.609221	0.612316	0.385973	0.62466	0.441161	0.482346	0.580359	0.464485	0.417246	1.91074	2.92151	2.25001	2.85309	2.37611	2.71138	2.74013	2.46342	2.449
1344.98	1.06238	0.801868	0.115783	0.15274	0.526577	0.145289	0.439437	0.280963	0.263482	0.537362	0.230476	0.235841	0.249456	0.317534	0.241641	0.652621	0.496283	0.249381	0.293137	0.478857	0.445139	0.306912	0.25561	0.328067	0.566076	0.453641	0.541841	0.670115	0.952462	0.487854	0.363394	0.585076	0.688458	0.384585	0.634618	0.465469	0.442407	0.549237	0.475183	0.462678	1.80813	2.73027	2.14478	2.78851	2.40858	2.82477	2.53491	2.14655	2.38866
1343.92	1.31181	1.01874	0.303754	0.0877048	0.491765	0.164381	0.412421	0.206504	0.220593	0.572855	0.15084	0.196925	0.281457	0.319714	0.199653	0.578434	0.470367	0.211944	0.280651	0.417596	0.384125	0.196112	0.113041	0.243359	0.506446	0.478744	0.531043	0.661689	0.788695	0.542869	0.32685	0.511763	0.685601	0.36944	0.581098	0.433064	0.437947	0.493997	0.448211	0.387806	2.01015	2.92487	2.14583	2.4288	2.45631	2.98046	2.48728	2.14824	2.45349
1342.86	1.56433	0.879369	0.411573	0.131568	0.389705	0.120143	0.213654	0.0968221	0.107625	0.26452	0.141298	0.16047	0.240908	0.254129	0.20265	0.427057	0.386044	0.154886	0.219383	0.313966	0.228642	0.0905546	0.0473601	0.0844861	0.380389	0.493235	0.49775	0.64879	0.737766	0.506176	0.25112	0.399214	0.507625	0.318068	0.462567	0.383527	0.421602	0.404312	0.409811	0.357454	2.10332	2.69898	2.15449	2.37019	2.42166	2.53828	2.60182	2.32723	2.48477
1341.8	1.54056	0.950411	0.583822	0.277567	0.145249	0.222548	0.208916	0.114824	0.217986	0.0924418	0.117024	0.0946158	0.138121	0.113561	0.103074	0.318059	0.39441	0.151669	0.18464	0.163521	0.122946	0.0589088	0.0672128	0.0605613	0.324784	0.460701	0.471216	0.62181	0.759758	0.473682	0.218998	0.345749	0.326675	0.288094	0.333582	0.348709	0.348553	0.329077	0.326018	0.303646	2.11464	2.58304	2.15984	2.07489	2.31223	2.10218	2.54659	2.39307	2.6751
1340.75	1.47296	0.655459	0.712507	0.48258	0.036396	0.188915	0.216379	0.290682	0.17991	0.214024	0.0747084	0.0520461	0.161773	0.0611051	0.0300716	0.290944	0.424125	0.120267	0.156629	0.107912	0.0917686	0.0248511	0.231937	0.071257	0.288876	0.438505	0.425811	0.477474	0.768555	0.453167	0.250545	0.300593	0.287612	0.246864	0.279961	0.301793	0.297239	0.273039	0.248441	0.364196	2.07709	2.26048	2.20266	1.81654	2.2105	2.05355	2.83034	2.23076	2.64993
1339.69	1.31261	0.336748	0.616575	0.449444	0.287868	0.139311	0.148907	0.374811	0.125123	0.101989	0.176095	0.0141824	0.0776825	0.0270733	0.040982	0.237422	0.392005	0.132261	0.0675531	0.0552339	0.11227	0.10601	0.263497	0.100201	0.238047	0.40155	0.368287	0.337193	0.705736	0.405476	0.236502	0.274724	0.287411	0.171796	0.231061	0.280079	0.199088	0.267693	0.223964	0.300347	1.92082	2.0467	2.0536	1.58898	2.30595	2.16235	2.89253	2.14193	2.3201
1338.63	1.22078	0.32306	0.376704	0.438709	0.24021	0.154268	0.319851	0.492769	0.216349	0.20142	0.164977	0.0271962	0.0448114	0.0692281	0.0568755	0.190538	0.310101	0.0890335	0.0405727	0.0862001	0.125913	0.192119	0.2746	0.127598	0.228413	0.351958	0.315841	0.27904	0.76393	0.400968	0.238745	0.24761	0.406529	0.196692	0.267549	0.232582	0.133069	0.267494	0.248634	0.297123	1.74017	1.8893	2.36389	1.56245	2.27977	2.28734	2.97617	1.9031	2.09512
1337.57	1.59243	0.0974331	0.293847	0.383557	0.200765	0.260483	0.471923	0.629257	0.0855764	0.305047	0.157361	0.0727339	0.102083	0.110548	0.0907719	0.262167	0.209324	0.0759129	0.0545891	0.122163	0.149346	0.204675	0.26576	0.0801049	0.21518	0.307888	0.290472	0.248406	0.704874	0.385347	0.230683	0.219494	0.471077	0.159885	0.296927	0.186963	0.107874	0.240604	0.255922	0.202421	1.8321	1.85103	2.51119	1.67707	2.0105	2.5833	2.84807	1.89951	1.94598
1336.51	1.78163	0.365791	0.295878	0.295036	0.362832	0.372612	0.687191	0.990698	0.269227	0.525562	0.123557	0.124514	0.101996	0.147926	0.191684	0.349822	0.155561	0.10957	0.0540176	0.178208	0.171367	0.137609	0.188841	0.112601	0.2102	0.269247	0.305731	0.281532	0.665672	0.34594	0.150989	0.221813	0.470656	0.132776	0.296506	0.142775	0.106071	0.179288	0.21551	0.134391	1.64934	1.8599	2.70944	2.04989	1.62581	2.62378	2.83362	2.16589	1.65936
1335.45	1.69618	0.789087	0.405419	0.378946	0.470787	0.64564	0.921102	1.32291	0.624577	0.875921	0.0967674	0.115987	0.136723	0.142927	0.144811	0.280481	0.142829	0.153683	0.0761886	0.154437	0.161506	0.175696	0.160555	0.17211	0.180297	0.192833	0.300531	0.313748	0.62762	0.330364	0.113721	0.220075	0.438058	0.100355	0.259123	0.0728139	0.0613552	0.131941	0.15089	0.108181	1.47345	1.84609	2.82039	2.09517	1.30777	2.30527	2.28046	1.96777	1.56309
1334.39	1.80729	0.941176	0.736445	0.650096	0.531229	0.760816	1.09273	1.60474	0.731847	1.09181	0.163498	0.129145	0.174763	0.170803	0.107651	0.210201	0.0684385	0.142322	0.0710477	0.171413	0.126155	0.153671	0.255364	0.149863	0.176164	0.174234	0.277384	0.273272	0.56201	0.331929	0.119594	0.188605	0.377316	0.0893222	0.251297	0.0382243	0.0524147	0.0848123	0.077376	0.145812	1.67199	1.69542	2.52453	1.88753	1.25496	2.30129	2.15757	1.65713	1.84595
1333.33	1.54263	1.01527	0.759475	0.787457	0.727516	0.940377	1.0294	1.76548	0.911758	1.04249	0.248509	0.108136	0.159633	0.185917	0.0705481	0.132978	0.0115073	0.104493	0.0314527	0.144363	0.0893376	0.130349	0.240106	0.079112	0.0603957	0.140589	0.210211	0.230169	0.49022	0.277819	0.0502338	0.149039	0.3575	0.0755358	0.110697	0.0205571	0.0120032	0.0523686	0.0314213	0.0777762	1.58809	1.93224	2.34159	2.09193	1.73289	2.1216	1.94879	1.51062	1.7872
1332.27	1.5426	1.36045	0.825766	0.909	0.566451	0.82285	0.965935	1.87875	0.656021	0.870945	0.30589	0.115751	0.141708	0.198831	0.0398286	0	0.00730993	0.0198327	0.0615726	0.146445	0.11668	0.200536	0.196218	0.0235253	0.0455542	0.103949	0.149545	0.247788	0.479003	0.268518	0.0784934	0.162271	0.28539	0.139979	0.110294	0.00986585	0.0273146	0.0431463	0.0614228	0.0808412	1.38223	2.22864	2.48223	1.84937	2.04769	2.03675	2.18197	1.05416	2.07034
1331.21	1.9812	1.34603	0.80018	0.897888	0.628097	0.821625	0.808113	1.91428	0.554121	0.767365	0.298312	0.151755	0.225292	0.22349	0.0637743	0.103811	0.0664131	0.0580403	0.103885	0.181089	0.243019	0.293724	0.337971	0.000774664	0.0995134	0.152769	0.14192	0.281449	0.513341	0.214404	0.130278	0.168115	0.320734	0.159126	0.166733	0.0327504	0.0667904	0.0345705	0.120686	0.127193	1.41742	2.53365	2.71723	1.94546	2.42509	2.44746	2.17858	1.22659	2.53945
1330.15	1.82249	1.32473	0.774577	0.671422	0.589681	0.823521	0.945641	2.0604	0.590636	0.719455	0.25672	0.203558	0.199409	0.261181	0.0812203	0.166512	0.152383	0.0935022	0.137526	0.231524	0.316273	0.382009	0.350091	0.124345	0.123125	0.169882	0.154005	0.290965	0.518163	0.203926	0.134952	0.170066	0.269191	0.18681	0.164044	0.0598658	0.0639586	0.0368262	0.129183	0.146767	1.3346	2.72039	2.70199	1.78877	2.38568	2.74906	2.33066	1.48654	2.6367
1329.09	1.56724	1.09558	0.694279	0.513005	0.7071	0.97309	1.08846	2.11242	0.650288	0.818509	0.35176	0.298966	0.293988	0.330452	0.150993	0.225806	0.204804	0.188963	0.180158	0.30308	0.366301	0.505013	0.453075	0.252904	0.217681	0.213802	0.204868	0.382541	0.562108	0.18802	0.224925	0.179856	0.34841	0.212853	0.218388	0.0607782	0.0739211	0.086781	0.150583	0.218818	1.06308	2.53033	2.33874	1.9878	2.15592	2.73257	2.20817	1.82775	2.65293
1328.03	1.32409	0.956194	0.915631	0.866883	0.790939	1.19705	1.37377	2.53371	0.902786	1.07506	0.495785	0.39125	0.425647	0.427445	0.273278	0.393195	0.325376	0.273409	0.187735	0.471649	0.553164	0.633891	0.691112	0.465915	0.382704	0.247711	0.315659	0.501927	0.716556	0.23834	0.369939	0.229839	0.511894	0.169845	0.358286	0.09302	0.14873	0.162674	0.183848	0.283532	1.29322	2.50768	2.11986	1.94728	2.21903	2.70725	2.26277	2.07112	2.64293
1326.97	0.906553	0.760552	0.879002	1.05824	0.952098	1.44161	1.34152	2.80671	0.859975	1.19752	0.56693	0.446922	0.539623	0.500479	0.393591	0.517587	0.402553	0.406807	0.23158	0.567726	0.671029	0.597087	0.801841	0.611362	0.482769	0.272084	0.383351	0.596085	0.860378	0.301442	0.430031	0.367117	0.653553	0.19773	0.403599	0.12796	0.232675	0.224989	0.282791	0.346755	1.54932	2.4707	2.15007	2.39683	2.31211	2.52104	2.52492	2.25296	2.3116
1325.91	0.793959	1.10454	0.988706	1.30368	1.09949	1.51001	1.4525	3.24082	0.819823	1.377	0.686705	0.507837	0.680646	0.602269	0.509415	0.621109	0.462433	0.524085	0.344633	0.741968	0.865497	0.590061	0.851295	0.758589	0.675875	0.346181	0.427141	0.685806	1.01583	0.482689	0.604038	0.502524	0.705472	0.310321	0.528421	0.210358	0.353409	0.314226	0.397836	0.450763	1.82361	2.4459	2.5739	2.53337	2.38251	2.45365	2.97618	2.18655	2.28556
1324.84	1.3363	1.40259	1.11315	1.46226	1.2852	1.63276	1.55114	3.40595	0.969443	1.55979	0.76411	0.554437	0.87096	0.745501	0.657863	0.919433	0.585686	0.675516	0.50506	0.933872	1.05145	0.68566	0.92365	0.878743	0.831489	0.519836	0.524607	0.776243	1.1841	0.59429	0.791675	0.684968	0.873949	0.427398	0.706541	0.329334	0.479477	0.442273	0.53937	0.628702	2.11044	2.78705	3.13456	2.78811	2.85645	3.12356	3.09995	2.5085	2.41967
1323.78	1.63018	1.61772	1.31025	1.45009	1.36398	1.81455	1.83988	3.74388	0.906886	1.73146	0.84588	0.670368	0.941924	0.883919	0.747739	1.13415	0.696127	0.859097	0.655307	1.16136	1.16652	0.919161	1.01766	1.04917	0.913929	0.690976	0.622727	0.884494	1.34488	0.751107	0.943023	0.869399	1.002	0.60923	0.839761	0.504693	0.585366	0.607364	0.65982	0.802894	2.23618	2.96669	3.61337	3.03325	2.64126	3.76454	3.34572	2.57145	2.84925
1322.72	1.82144	1.73603	1.5135	1.40135	1.56515	1.9331	2.24613	4.1383	1.02342	1.99033	1.11651	0.831488	1.0525	1.0248	0.912418	1.31676	0.830455	1.00567	0.762152	1.32649	1.34705	1.10114	1.16932	1.18824	1.13984	0.931326	0.801536	1.10015	1.55839	0.846902	1.1197	1.06503	1.25665	0.834423	0.979278	0.659469	0.736705	0.77955	0.814883	1.00571	2.1552	3.27769	3.60881	3.20156	2.67789	4.0861	3.46787	2.66269	3.55962
1321.66	2.14143	1.98231	1.82405	1.83422	1.86777	2.11367	2.63556	4.60709	1.28835	2.40666	1.3598	0.978695	1.21233	1.17274	1.10066	1.51897	1.08916	1.12688	0.851093	1.47646	1.57194	1.35401	1.45462	1.45043	1.41335	1.08614	0.973116	1.32067	1.82889	0.969598	1.2778	1.24647	1.49247	0.972702	1.14225	0.790914	0.906196	0.947327	0.975173	1.17199	2.1881	3.83736	3.74254	3.31325	2.98119	4.41915	3.6629	2.66256	3.75012
1320.6	2.00028	1.85893	1.97387	1.96909	2.02274	2.29096	2.67114	4.62826	1.2245	2.31445	1.54133	1.10375	1.27964	1.34383	1.20102	1.69971	1.36507	1.31506	0.87997	1.59775	1.74435	1.47607	1.65671	1.67028	1.59705	1.23674	1.11206	1.51635	2.07128	1.17801	1.4253	1.43698	1.66818	1.10927	1.28638	0.892065	1.0687	1.04324	1.14734	1.30826	2.14787	3.93943	3.58571	3.29136	3.30859	4.38804	3.64048	2.45429	3.96733
1319.53	2.07527	2.10962	2.06758	2.09684	2.14649	2.58332	2.76886	4.59072	1.50048	2.35366	1.69107	1.2088	1.45733	1.53531	1.3057	1.91561	1.59939	1.46611	0.945378	1.85472	2.00325	1.57038	1.83671	1.84321	1.72154	1.38568	1.24716	1.69253	2.37212	1.36273	1.58744	1.53888	1.74712	1.29119	1.41085	1.02288	1.23578	1.1738	1.34367	1.47643	2.37317	4.15288	3.61706	3.30977	3.60139	4.08606	3.68761	2.57457	3.94431
1318.47	2.16555	2.32028	2.12905	2.11633	2.24656	2.76442	2.82839	4.38809	1.47378	2.42598	1.78897	1.33011	1.67455	1.67359	1.50653	2.20578	1.83919	1.65659	1.09067	2.14626	2.30645	1.71058	1.99784	2.08098	1.93218	1.58322	1.42318	1.94818	2.62863	1.57299	1.78208	1.77535	1.82368	1.48664	1.62625	1.21049	1.42484	1.37549	1.57703	1.66207	2.59295	4.43635	3.68444	3.16105	3.95617	4.002	3.56944	2.74614	3.99285
1317.41	2.34436	2.69507	2.46489	2.41517	2.45586	3.08623	2.98422	4.61647	1.47514	2.82489	1.94148	1.46767	1.84538	1.79676	1.7302	2.44145	1.93698	1.89164	1.30137	2.50712	2.55024	1.82153	2.11494	2.27424	2.06152	1.83103	1.62245	2.19019	2.89884	1.81024	1.92484	1.99324	1.96813	1.6252	1.83123	1.44085	1.60762	1.60693	1.76492	1.89147	2.88491	4.09938	4.21	3.25542	3.81147	3.86332	3.88119	3.07962	4.06067
1316.34	2.32193	2.78844	2.62086	2.43308	2.50613	3.1696	3.03673	4.77951	1.624	3.16352	2.13688	1.58631	2.02451	1.89511	1.95268	2.61591	2.07236	2.04378	1.44883	2.78731	2.8086	1.96115	2.22795	2.38204	2.32364	2.09004	1.82176	2.45887	3.13275	1.99991	2.12002	2.19104	2.09902	1.7479	1.97225	1.63851	1.76485	1.81151	1.9947	2.08391	3.09674	4.36458	4.39287	3.1085	3.59332	3.9084	3.99809	3.22234	4.33306
1315.28	2.31559	2.64401	2.74537	2.49108	2.39832	3.13766	2.99824	4.64227	1.61273	3.19056	2.29727	1.66612	2.20205	2.02198	2.08086	2.70596	2.27081	2.14133	1.56298	2.94666	2.91036	2.02344	2.39154	2.51841	2.50794	2.25547	2.0188	2.62994	3.35257	2.21255	2.22146	2.32139	2.17111	1.86487	2.05104	1.79265	1.88804	1.97312	2.13802	2.24041	3.27361	4.26068	4.42206	3.07047	3.37836	3.93115	4.39989	3.21587	4.05619
1314.22	2.03231	2.44012	2.65167	2.44065	2.29459	2.94174	3.04641	4.30399	1.45731	3.09157	2.32548	1.70586	2.19166	2.09465	2.04287	2.73631	2.34894	2.20646	1.53587	2.9781	2.91742	2.00714	2.30523	2.43509	2.5483	2.39332	2.16026	2.70941	3.40759	2.33278	2.22064	2.34426	2.19263	1.90527	2.01936	1.88575	1.94103	2.01276	2.17367	2.28996	2.62741	3.81741	4.16021	3.11426	3.3785	3.65144	4.20727	2.71705	3.71974
1313.15	2.21696	2.36918	2.57984	2.29832	2.27988	2.88082	2.9851	3.59732	1.49443	2.92313	2.34034	1.7297	2.2107	2.13143	1.95701	2.78266	2.41069	2.23282	1.45246	2.99274	2.89801	2.09767	2.29387	2.39841	2.53689	2.55423	2.316	2.77226	3.47393	2.33794	2.13583	2.33452	2.21964	1.99815	2.0143	1.978	2.00264	2.06591	2.23637	2.30715	2.1882	3.65321	3.90597	3.18427	3.25612	3.12187	4.22401	2.53199	3.38527
1312.09	2.0773	2.29873	2.24171	2.10606	2.36149	2.52057	2.92423	3.17068	1.40945	2.70583	2.2998	1.77449	2.21256	2.14206	1.96694	2.8554	2.46175	2.29924	1.46505	3.02393	2.87594	2.17182	2.27884	2.45752	2.5616	2.6618	2.44973	2.87046	3.46733	2.47471	2.14792	2.37628	2.30208	2.06592	2.02032	2.05388	2.06097	2.13156	2.26806	2.2976	1.97403	3.68404	3.80549	3.40924	3.52485	2.99794	4.04107	2.47821	3.18748
1311.02	2.27383	2.48109	2.2849	2.23981	2.51832	2.48495	2.97145	2.95511	1.51289	2.6023	2.36311	1.73909	2.13198	2.12219	1.97399	2.85261	2.42557	2.32602	1.48269	3.01232	2.75822	2.12759	2.27721	2.40543	2.53802	2.78812	2.57119	2.8927	3.40356	2.49	2.11942	2.3677	2.3137	2.04571	2.04975	2.09801	2.07817	2.19255	2.24947	2.30805	1.92642	3.53528	3.59307	3.21747	3.63811	2.91342	3.75849	2.72847	2.88052
1309.96	2.36204	2.55423	2.24431	2.21645	2.52499	2.41335	2.98614	2.85734	1.628	2.63832	2.36953	1.72809	2.09339	2.10877	2.00922	2.8338	2.37515	2.25139	1.44952	2.97969	2.63791	2.05984	2.31826	2.39362	2.50234	2.83145	2.61437	2.97135	3.3106	2.50107	2.16527	2.35203	2.29978	1.97185	2.06538	2.10943	2.06693	2.23074	2.32406	2.2707	1.82929	3.60856	3.05659	2.96638	3.25851	3.3576	3.25857	2.85792	2.64396
1308.89	2.21055	2.39331	2.1959	2.1837	2.33732	2.25627	2.76971	2.48341	1.42873	2.52142	2.35117	1.65667	2.07416	2.1638	1.99765	2.73975	2.41566	2.15714	1.41733	2.93606	2.56143	1.96805	2.35974	2.36447	2.47243	2.76458	2.65409	2.96334	3.27067	2.51299	2.15049	2.31939	2.2655	1.96985	2.07493	2.09206	2.04305	2.21501	2.30536	2.21855	2.22077	3.40467	2.90836	2.5465	3.24244	3.02155	3.11182	2.74102	2.45935
1307.83	2.0701	2.47062	2.04028	2.08483	2.20771	2.165	2.74444	2.258	1.04362	2.51965	2.21707	1.58644	2.02101	2.08644	1.9622	2.60541	2.30111	2.0366	1.32559	2.76266	2.48023	1.83495	2.28418	2.18199	2.39794	2.64002	2.61244	2.88447	3.10188	2.46011	2.06707	2.18105	2.12038	1.8911	1.99134	2.06498	1.98353	2.17012	2.25529	2.15139	2.01504	3.16887	2.81372	2.41397	2.9965	2.57415	2.79436	2.39881	2.52835
1306.76	2.7564	2.45094	2.01299	1.81484	2.16131	2.08432	2.57336	1.96991	1.03757	2.52386	2.13501	1.55349	1.94876	1.99965	1.87372	2.4434	2.20582	1.91843	1.26772	2.5546	2.38175	1.81394	2.23784	2.06913	2.31753	2.58751	2.51832	2.78629	2.93128	2.4046	1.92463	2.04681	2.04527	1.84385	1.95573	2.02217	1.92361	2.09898	2.17576	2.02917	1.81778	2.97068	2.48041	2.09224	2.62656	2.29897	2.98387	2.14418	2.45301
1305.7	2.66933	2.1917	1.81536	1.67032	1.98866	1.82232	2.3289	1.86008	1.15144	2.31147	1.94542	1.53723	1.89894	1.91304	1.79484	2.31743	2.02138	1.78939	1.26336	2.34781	2.24593	1.68962	2.08324	1.97598	2.13242	2.44577	2.36178	2.58861	2.72073	2.36927	1.79976	1.91087	2.05987	1.74736	1.84776	1.91543	1.80732	2.00796	2.06	1.88739	1.78626	3.03266	2.24981	2.08982	2.50232	2.5435	3.03739	1.72837	2.55468
1304.63	2.24119	2.14759	1.96808	1.64355	1.87502	1.62142	2.21922	1.63123	1.45662	2.10614	1.82585	1.45231	1.69498	1.76187	1.61707	2.13906	1.82811	1.66347	1.15809	2.1517	1.99474	1.4592	1.89966	1.8005	1.92059	2.31184	2.20344	2.34821	2.43889	2.15436	1.71747	1.75042	2.03405	1.67632	1.72372	1.74978	1.64012	1.87054	1.87631	1.73962	1.5473	3.1141	1.96867	1.64611	2.48714	2.6123	2.85125	1.37418	2.41147
1303.56	1.66169	1.81602	1.84012	1.51884	1.63775	1.3433	2.06626	1.43281	1.51166	2.05023	1.63477	1.36234	1.44275	1.57632	1.42511	1.8941	1.60931	1.46498	1.02745	1.85839	1.697	1.15114	1.50892	1.65403	1.70614	2.09315	2.006	2.09752	2.10133	1.92942	1.57553	1.5908	1.90316	1.54132	1.55338	1.53968	1.42923	1.67735	1.70521	1.54762	1.2415	2.71207	1.6167	1.27425	2.22317	2.37188	2.46834	1.16541	2.06641
1302.5	0.474072	1.2574	1.51702	1.39749	1.25417	0.972781	1.46346	0.780412	1.0639	1.78419	1.5506	1.25288	1.29123	1.47351	1.29396	1.74053	1.45954	1.30436	0.895919	1.70215	1.45552	0.958414	1.25622	1.53423	1.55694	1.87299	1.80008	1.89571	1.87086	1.71838	1.4502	1.47718	1.74704	1.46965	1.37177	1.37102	1.24951	1.47569	1.52274	1.41634	1.51033	2.46334	1.88864	1.32851	2.38883	1.8849	2.1467	1.18314	1.8755
1301.43	0.600874	1.16764	1.24344	1.20946	0.986106	0.857658	1.22581	0.544236	0.824485	1.39666	1.46372	1.08987	1.21686	1.35793	1.20725	1.52483	1.31964	1.12255	0.803409	1.54214	1.30469	0.837044	1.09234	1.41314	1.40939	1.66009	1.63757	1.70284	1.68617	1.55464	1.28453	1.33712	1.61341	1.35995	1.21194	1.23736	1.12475	1.29959	1.36748	1.31192	1.48288	2.1819	2.17512	1.41179	2.27415	1.34279	1.9232	1.01162	1.93714
1300.36	1.6389	1.21389	1.02776	1.09363	0.960761	0.730063	0.987114	0.619059	0.720816	1.14855	1.34722	0.936455	1.11819	1.22728	1.05935	1.24995	1.19656	0.981691	0.687711	1.35821	1.15263	0.751623	0.960556	1.22008	1.28396	1.47948	1.44221	1.53134	1.51049	1.41985	1.11319	1.169	1.41135	1.1858	1.10534	1.10882	1.01391	1.11419	1.20493	1.16204	1.59326	1.85215	2.09898	1.63092	1.98145	1.36599	1.7556	0.922479	1.56967
1299.3	2.49514	0.973169	0.886534	1.08264	1.01658	0.704178	0.767039	0.685906	0.564468	0.954403	1.11939	0.780906	1.01798	1.09196	0.934007	1.05717	1.01017	0.813823	0.620965	1.20134	0.99847	0.637034	0.901602	1.03789	1.13091	1.32125	1.21182	1.31257	1.37374	1.24857	0.924872	0.988874	1.29203	1.02798	1.01306	0.973028	0.860006	0.962644	1.06358	1.01598	1.47129	1.95961	1.72178	1.695	1.60047	1.30061	1.75561	0.822669	1.23071
1298.23	2.80735	1.28916	1.14529	1.24038	1.32346	0.750991	1.01942	0.839309	0.755331	1.09378	0.833335	0.683329	0.849666	0.933956	0.729825	0.865421	0.835	0.705629	0.544102	1.03041	0.815001	0.550716	0.807218	0.823654	0.927116	1.092	1.03262	1.14213	1.17966	1.05596	0.81712	0.793514	1.05046	0.911963	0.95191	0.795387	0.733254	0.813929	0.879009	0.824828	1.13626	1.7767	1.20812	1.17868	1.37471	1.39418	1.70072	0.81724	1.02521
1297.16	2.50499	1.11806	1.06616	1.20632	1.38577	0.654457	1.19723	0.860861	0.632692	1.21905	0.593027	0.557074	0.662872	0.73815	0.539487	0.638172	0.681152	0.558469	0.431626	0.72325	0.614871	0.447964	0.535608	0.613402	0.678536	0.880782	0.860244	0.909351	0.950926	0.843586	0.626809	0.598561	0.859626	0.817029	0.863417	0.612133	0.531791	0.646868	0.677466	0.658321	0.678426	1.33066	0.693817	0.700626	1.08225	0.984395	1.52261	0.791393	0.911843
1296.09	1.47977	0.915412	0.986361	1.0576	1.19971	0.500781	0.99374	0.663926	0.532903	1.07604	0.514685	0.56042	0.563619	0.560729	0.415927	0.518595	0.599292	0.459256	0.376373	0.527557	0.484719	0.439332	0.5118	0.551039	0.47837	0.752805	0.702406	0.778962	0.787345	0.725991	0.577532	0.512685	0.799589	0.701165	0.70662	0.484202	0.39382	0.522138	0.511689	0.564948	0.660423	1.22084	0.587395	0.74967	1.05419	0.983418	1.4009	0.834807	0.801879
1295.02	1.10126	0.848629	0.843019	0.703912	0.825893	0.392054	0.851483	0.459009	0.44804	0.844844	0.395066	0.474941	0.437059	0.40917	0.277191	0.40021	0.488009	0.332363	0.290295	0.376622	0.373738	0.403508	0.330145	0.464214	0.290578	0.628366	0.585608	0.606772	0.636253	0.629344	0.431669	0.427107	0.755717	0.565675	0.476948	0.327083	0.267019	0.398115	0.36364	0.445171	0.742723	0.797742	0.750123	0.594349	0.729936	0.686007	1.09942	0.506984	0.787909
1293.96	0.928024	0.651574	0.702077	0.694458	0.403184	0.300931	0.669737	0.411667	0.37218	0.610096	0.336278	0.36366	0.383315	0.268045	0.143081	0.259097	0.356209	0.215789	0.150174	0.170406	0.292719	0.295991	0.167985	0.310374	0.130631	0.505014	0.493325	0.440603	0.483287	0.509056	0.351827	0.303303	0.699218	0.397178	0.327407	0.199412	0.140317	0.240526	0.274604	0.345108	0.775761	0.838329	0.712477	0.893217	0.678611	0.659162	0.694806	0.134004	0.624026
1292.89	1.16491	0.425907	0.597614	0.587624	0.265976	0.34197	0.578587	0.389273	0.370737	0.572828	0.288033	0.218754	0.298002	0.204068	0.0706589	0.234659	0.231288	0.140877	0.0832775	0.121488	0.178309	0.149806	0.140863	0.218406	0.161156	0.416836	0.369495	0.332293	0.410331	0.373677	0.269507	0.232726	0.595758	0.273438	0.226555	0.134209	0.0594445	0.178389	0.224338	0.24321	0.734953	1.14584	0.457421	0.988122	0.904551	0.492657	0.886622	0.164377	0.343305
1291.82	0.984171	0.557698	0.595173	0.411011	0.272128	0.247817	0.540057	0.440428	0.53395	0.612204	0.255837	0.183111	0.324816	0.208135	0.0409057	0.23213	0.125091	0.112576	0.120933	0.0812347	0.0965907	0.178455	0.200331	0.144949	0.260631	0.275817	0.308069	0.301561	0.31865	0.286634	0.224208	0.179502	0.365374	0.208197	0.22965	0.103317	0.0600663	0.154418	0.223856	0.14601	0.594839	1.21238	0.308331	0.999486	1.15011	0.73529	0.76824	0.514819	0.250113
1290.75	0.747906	0.762934	0.483138	0.532487	0.42033	0.174925	0.631708	0.612182	0.500558	0.654152	0.232085	0.134734	0.31871	0.287881	0.0710745	0.248471	0.0696248	0.0473863	0.0891373	0.0504933	0.0894198	0.153967	0.195977	0.135169	0.32179	0.232014	0.268284	0.279956	0.308463	0.214419	0.120429	0.12947	0.296815	0.189205	0.183969	0.0876017	0.0582872	0.12714	0.178794	0.137561	0.423315	0.997012	0.201469	0.924727	1.07865	0.888041	1.08665	0.597133	0.147139
1289.68	0.852621	1.15912	0.494282	0.620941	0.719124	0.39339	0.878872	0.808316	0.769714	0.69316	0.160952	0.143137	0.368627	0.302584	0.100794	0.226798	0.141561	0.0521503	0.131304	0.100926	0.176098	0.188128	0.217667	0.140729	0.386653	0.156016	0.250451	0.278293	0.278292	0.209443	0.146783	0.137693	0.265855	0.0933205	0.159704	0.089761	0.0821258	0.116572	0.150158	0.155303	0.539907	0.935971	0.40834	1.02654	0.845252	0.970909	1.22202	0.535132	0.193597
1288.61	0.669316	1.06589	0.416063	0.617844	0.470361	0.340559	0.872711	0.568773	0.567005	0.33752	0.0625916	0.123923	0.239325	0.251559	0.0557762	0.160011	0.135033	0.0590545	0.106491	0.101337	0.24739	0.195861	0.0955248	0.0873859	0.331965	0.0668951	0.245354	0.223304	0.200032	0.193116	0.0558003	0.0842009	0.0939834	0.0118359	0.0989388	0.0613851	0.069249	0.0958241	0.109568	0.139077	0.739157	0.459367	0.538067	0.739396	0.377847	0.910792	0.806573	0.40392	0.20716
1287.54	0.787556	0.921516	0.386712	0.762822	0.474144	0.357347	0.865087	0.399912	0.658874	0.131378	0.0207191	0.0991344	0.196586	0.223491	0.0602885	0.117196	0.16241	0.0869371	0.16549	0.0651612	0.348698	0.172416	0.0800342	0.0759243	0.188703	0.0279749	0.238898	0.15691	0.120468	0.174587	0.00555843	0.00171096	0.0039321	0.00973531	0.0803866	0.039425	0.0398166	0.0295012	0.129025	0.146874	0.519227	0.494097	0.317044	0.413741	0.506842	0.582996	0.568633	0.116801	0.383865
1286.47	1.14254	0.851364	0.424917	0.850581	0.679224	0.586823	0.959042	0.609587	0.932382	0.423366	0.0821855	0.0825167	0.147675	0.169092	0.0760629	0.0952789	0.19626	0.222906	0.265407	0.179079	0.355489	0.20362	0.142798	0.136252	0.123294	0.0189904	0.240508	0.129841	0.0822992	0.142426	0.0276308	0.0372946	0.0550759	0.0741851	0.077186	0.0497569	0.0406822	0.047458	0.128902	0.138556	0.534533	0.429039	0.532576	0.0714871	0.55967	0.479604	0.393391	0.125585	0.523133
1285.4	1.18414	0.521775	0.335055	0.427083	0.594723	0.334043	0.505551	0.595228	0.65988	0.477862	0.180899	0.134375	0.157603	0.158203	0.107308	0.148443	0.187887	0.363067	0.385795	0.17606	0.353405	0.395023	0.228943	0.166486	0.153176	0.0474415	0.216576	0.106191	0.0656394	0.0761673	0.0443477	0.0309538	0.0765353	0.111619	0.076124	0.0894451	0.073136	0.0518776	0.124274	0.106761	0.450972	0.345996	0.562105	0.170503	0.522283	0.537319	0.303347	0.280572	0.242302
1284.33	1.0835	0.44349	0.337281	0.200422	0.661091	0.254313	0.361727	0.678017	0.398407	0.538738	0.232525	0.118911	0.115395	0.171023	0.0884899	0.209715	0.223577	0.412915	0.39936	0.105425	0.260616	0.513188	0.307446	0.246809	0.127004	0.0484562	0.162383	0.0830624	0.106061	0.0547	0.0757855	0.056297	0.142013	0.127605	0.0513441	0.0819465	0.0786962	0.06716	0.0843996	0.0866753	0.136386	0.148407	0.709759	0.167046	0.374844	0.380631	0.377564	0.437075	0.205082
1283.26	1.03079	0.550268	0.340786	0.203332	0.737329	0.426742	0.372432	0.687714	0.313219	0.806681	0.277137	0.102515	0.150515	0.206096	0.0848926	0.224779	0.298011	0.412574	0.421748	0.16874	0.225593	0.611782	0.404667	0.220441	0.16131	0.0463295	0.130305	0.0646471	0.106044	0.0420742	0.144144	0.0574018	0.200746	0.110895	0.106982	0.0752302	0.0631544	0.0918028	0.0550254	0.06817	0.0556688	0.15587	0.622623	0.262702	0.304541	0.473613	0.39653	0.505632	0.171971
1282.19	0.87589	0.458912	0.505043	0.377975	0.418693	0.414141	0.488569	0.509841	0.370343	0.680467	0.383963	0.101915	0.065614	0.199047	0.0748177	0.237099	0.293753	0.389504	0.418031	0.192371	0.285081	0.507594	0.383991	0.224368	0.209254	0.0204171	0.116419	0.0504479	0.079294	0.0785493	0.162247	0.0785113	0.171703	0.120734	0.205085	0.0745666	0.0454224	0.11382	0.0296675	0.0560629	0.254282	0.508761	0.182772	0.36628	0.569235	0.764231	0.0760512	0.57219	0.229636
1281.12	0.856403	0.774082	0.448966	0.493852	0.432945	0.575001	0.558048	0.335945	0.574159	0.693457	0.320518	0.0852031	0.0550891	0.217898	0.0904559	0.314925	0.355841	0.354547	0.421388	0.248064	0.366116	0.310739	0.334974	0.252314	0.296179	0.0258686	0.0763612	0.045182	0.0873076	0.111173	0.138115	0.11446	0.213167	0.135613	0.217951	0.0453327	0.0498385	0.117224	0.0594382	0.0623822	0.222324	0.817272	0.0850737	0.559569	0.698688	0.467595	0.315146	0.269442	0.319134
1280.05	0.82109	0.919953	0.338729	0.579218	0.278655	0.723565	0.555751	0.353634	0.574394	0.537462	0.22979	0.136622	0.124455	0.199793	0.0878104	0.353323	0.345536	0.445347	0.436701	0.314296	0.440502	0.324688	0.341914	0.271782	0.399481	0.0368477	0.0288761	0.0497675	0.0763146	0.12631	0.114746	0.219824	0.201396	0.261619	0.278838	0.0343368	0.0785095	0.110445	0.0897746	0.0986734	0.352839	1.13057	0.13598	0.282183	0.630627	0.300307	0.0873283	0.080898	0.426342
1278.97	1.13851	0.747693	0.187041	0.334506	0.229437	0.43145	0.393067	0.264073	0.396044	0.346395	0.0887432	0.17178	0.200612	0.187081	0.105133	0.390389	0.337628	0.545289	0.449905	0.229533	0.48766	0.359995	0.298131	0.235382	0.514214	0.0422285	0	0.0218719	0.0660418	0.0674112	0.123193	0.289376	0.239435	0.401152	0.324142	0.0727655	0.115554	0.0951391	0.128259	0.118465	0.541096	0.974898	0.414251	0.509356	0.295987	0.214189	0.195683	0.0713933	0.356252
1277.9	0.836252	0.555587	0.37393	0.0944619	0.190513	0.271981	0.419224	0.14012	0.238751	0.14465	0.0581675	0.158895	0.279194	0.0911846	0.122757	0.435727	0.402117	0.621628	0.518126	0.152376	0.444787	0.340226	0.326303	0.242445	0.443459	0.070541	0.027393	0.0213376	0.0716324	0.0817181	0.221813	0.405078	0.376366	0.545011	0.41824	0.0919665	0.168819	0.124897	0.206155	0.187336	0.628606	0.903716	0.983551	0.683048	0.157209	0.105635	0.503784	0.375796	0.571967
1276.83	0.607318	0.548371	0.505411	0.214764	0.238564	0.176078	0.394707	0.0508581	0.129227	0.27022	0.152397	0.171216	0.292717	0.139875	0.178022	0.484062	0.594869	0.638035	0.563346	0.26059	0.483503	0.456005	0.57878	0.284891	0.408242	0.181785	0.0963177	0.109763	0.142648	0.128249	0.392676	0.548347	0.522586	0.74581	0.564019	0.152672	0.229035	0.191565	0.25648	0.290363	0.520867	0.943499	0.798559	0.731656	0.465889	0.376742	1.11327	0.54774	0.566127
1275.76	0.873586	0.458334	0.762087	0.564047	0.406563	0.28484	0.571135	0.208336	0.294242	0.460636	0.353663	0.223387	0.402037	0.187448	0.318261	0.651835	0.737954	0.726928	0.616938	0.520294	0.65374	0.446406	0.702274	0.480094	0.424556	0.327097	0.229901	0.206149	0.333863	0.305325	0.688651	0.797776	0.888505	0.950774	0.858426	0.257603	0.36141	0.320864	0.3891	0.42958	0.791571	1.26794	0.620551	0.538136	1.11302	0.525869	1.51999	0.982822	0.691597
1274.68	1.04773	0.617211	0.756382	0.717955	0.681843	0.574668	0.703099	0.499436	0.383467	0.576494	0.464156	0.293748	0.461301	0.278133	0.392687	0.760601	0.842197	0.834186	0.624184	0.797679	0.849111	0.451155	0.856094	0.680774	0.573368	0.490575	0.393782	0.316243	0.529608	0.459216	0.94363	1.11228	1.29736	1.17072	1.07909	0.363252	0.543788	0.500678	0.533574	0.554316	0.801522	1.39577	0.672636	0.868246	1.44917	0.405698	1.90934	1.12727	0.743496
1273.61	0.875888	0.944512	0.817273	0.762207	0.791151	0.670903	0.815764	0.555803	0.455653	0.502552	0.570961	0.429244	0.58923	0.445606	0.533197	0.968211	0.918895	1.01051	0.713578	1.03813	1.07775	0.710478	1.11735	0.916823	0.854058	0.702116	0.527952	0.462102	0.771328	0.676874	1.28102	1.49343	1.66783	1.51194	1.48287	0.465809	0.7506	0.736704	0.751343	0.724968	0.762582	1.47518	0.49142	0.909625	1.63835	0.490351	1.48125	1.2452	0.982652
1272.54	1.33731	1.08622	0.824374	0.831969	1.0259	0.652957	0.944458	0.796574	0.624104	0.656031	0.689987	0.526939	0.684893	0.63415	0.652009	1.15724	1.01464	1.18363	0.798397	1.27571	1.28889	0.927538	1.35181	1.12814	1.11235	0.923876	0.719469	0.619894	1.02884	0.794336	1.70643	1.8605	2.06662	1.99417	1.94288	0.636235	0.973091	0.967457	1.03002	0.875801	0.60653	1.51402	0.734135	1.0674	1.44382	0.769638	1.06901	1.12492	1.12087
1271.47	1.4292	1.1706	1.32685	0.834982	1.14941	0.848097	1.20232	1.06379	0.702029	0.961479	0.812452	0.615914	0.759832	0.776735	0.82078	1.50197	1.29003	1.36802	0.915853	1.60659	1.57128	1.09169	1.60516	1.35278	1.3022	1.18118	0.919512	0.916931	1.24853	0.969266	2.16235	2.27328	2.47053	2.63682	2.39346	0.834041	1.22588	1.16382	1.29564	1.1207	0.711272	1.89629	0.859491	1.34929	1.20485	0.94077	0.839622	1.13802	1.44301
1270.39	1.54761	1.33355	1.68121	1.11057	1.1517	1.18188	1.39628	1.1632	0.83871	1.33025	0.940566	0.698697	0.892847	1.02925	1.02207	1.83656	1.63305	1.57794	1.00867	1.92394	1.85673	1.35331	1.9014	1.66597	1.47741	1.45587	1.1063	1.2595	1.56006	1.11493	2.53585	2.67714	2.85623	3.26063	2.82889	1.05341	1.45955	1.40813	1.5397	1.3633	0.5258	2.20713	1.01125	1.81202	1.39429	1.21232	1.12797	1.00703	1.50322
1269.32	1.62218	1.36601	1.64701	1.35822	1.15527	1.31439	1.48481	1.26243	0.733176	1.59015	1.12017	0.813935	1.1453	1.24772	1.31702	2.174	1.9582	1.78979	1.13494	2.30308	2.18702	1.52895	2.09672	1.9088	1.65831	1.72633	1.35806	1.56526	1.93236	1.36511	2.82766	2.96956	3.17476	3.72922	3.14823	1.28839	1.67795	1.60268	1.76601	1.57734	0.6137	2.37587	1.208	1.80614	1.7674	1.28406	1.47444	1.34437	1.60728
1268.24	1.61223	1.52723	1.63961	1.40763	1.23373	1.45678	1.63431	1.60652	0.954801	1.72826	1.26966	0.904094	1.35384	1.40858	1.50697	2.39368	2.08846	1.92878	1.23774	2.4944	2.37295	1.61785	2.20208	2.06876	1.80483	1.97269	1.59314	1.73563	2.18048	1.60487	2.88258	3.11524	3.46745	3.89485	3.14218	1.46467	1.84431	1.78726	1.89056	1.71444	0.736533	2.40583	1.27896	1.98953	1.92363	1.26299	1.68229	1.71562	1.23928
1267.17	1.33806	1.67907	1.50469	1.37582	1.39603	1.37049	1.64117	1.506	1.00331	1.76788	1.40061	0.995248	1.51457	1.5949	1.71317	2.51756	2.13664	1.95162	1.38367	2.54675	2.45458	1.7626	2.18982	2.19023	1.94538	2.1561	1.77236	1.87593	2.33805	1.85714	2.85792	3.13905	3.56338	3.75284	3.04742	1.56758	1.91652	1.92909	1.97869	1.76774	0.997859	2.24533	1.30348	1.82596	2.01595	1.23183	1.79207	1.95313	1.01769
1266.1	1.08486	1.52851	1.10348	1.11345	1.29801	1.10493	1.34775	1.32478	0.96012	1.55927	1.5726	1.00847	1.56676	1.68711	1.77372	2.36624	2.01557	1.90573	1.49129	2.40198	2.32636	1.75578	2.16429	2.07081	1.89998	2.25836	1.90146	1.95808	2.4148	1.96799	2.63444	2.91828	3.33689	3.42686	2.81298	1.61533	1.88355	1.95405	1.99928	1.69757	0.966612	2.07364	1.16997	1.55803	1.76216	1.11887	1.81998	1.91926	0.988248
1265.02	1.35999	1.11381	1.22446	0.800364	1.18261	0.941345	1.2486	1.38785	0.897623	1.49142	1.67856	1.01106	1.62977	1.75528	1.82535	2.23676	1.96533	1.84212	1.51711	2.30601	2.24506	1.75046	2.13001	1.98991	1.9021	2.28502	2.03777	2.06089	2.31764	2.07038	2.31685	2.65197	3.01897	3.05207	2.48954	1.63951	1.75667	1.9068	1.94808	1.64823	1.11432	1.98412	1.21953	1.44115	1.4683	1.0082	1.63125	1.93521	1.24929
1263.95	1.09768	0.959314	1.42665	0.687765	0.935809	0.855073	1.25665	1.14984	0.867182	1.2518	1.80957	1.02129	1.76076	1.82424	1.87442	2.05176	1.82329	1.93833	1.58089	2.1526	2.18342	1.7946	2.04767	1.95882	1.8479	2.28666	2.16413	2.16558	2.21989	2.10952	1.95161	2.35175	2.54459	2.62197	2.16551	1.64339	1.63476	1.89553	1.92957	1.56352	1.09382	2.02577	1.53654	1.44925	1.40922	1.05807	1.74347	1.66729	1.2765
1262.87	1.14171	0.891161	1.10502	0.487269	0.700084	0.647949	1.11295	0.909757	0.609579	1.09369	1.90068	1.02621	1.79989	1.88865	1.94747	1.82293	1.7935	1.99264	1.60535	2.06827	2.12954	1.82098	2.02842	1.80276	1.87564	2.2603	2.28827	2.21257	2.14622	2.14622	1.64584	2.04151	1.98976	2.26169	1.82834	1.61927	1.51812	1.81835	1.86047	1.51654	1.04841	1.76436	1.75209	1.36062	1.50239	1.25017	1.45895	1.26819	1.65946
1261.79	1.43463	0.940052	1.0218	0.328029	0.592458	0.563098	1.03253	0.839607	0.650818	1.21413	1.92422	1.00782	1.83239	1.89044	1.98116	1.71698	1.74713	1.96883	1.59978	1.98666	2.01924	1.82785	1.93823	1.65747	1.84733	2.24801	2.35753	2.16098	2.06705	2.17317	1.37465	1.71454	1.72546	1.8591	1.44779	1.55533	1.44198	1.76375	1.77161	1.48437	0.96058	1.71701	1.85683	1.21165	1.606	1.1825	1.46776	1.13878	1.47872
1260.72	1.46967	0.991158	0.768945	0.344998	0.847955	0.670817	1.10037	0.644329	0.405845	1.10537	1.91246	0.984915	1.80259	1.9679	2.05907	1.61869	1.71255	1.89361	1.59242	1.9339	1.98209	1.82083	1.79889	1.58261	1.79144	2.16827	2.33363	2.14701	1.96632	2.11743	1.18326	1.48748	1.33914	1.49762	1.15692	1.47358	1.34465	1.67552	1.6703	1.44217	1.0687	1.71815	1.71743	0.919269	1.97255	0.859479	1.43783	0.952128	1.34731
1259.64	0.77767	0.784728	0.501268	0.336307	0.922196	0.536286	0.913667	0.348788	0.24606	0.838588	1.85146	0.929664	1.74561	1.90158	2.07491	1.39975	1.68564	1.83847	1.57366	1.82573	1.84541	1.74925	1.74073	1.38063	1.61482	2.08052	2.25536	2.10098	1.88366	1.98176	0.979088	1.24365	1.09216	1.19465	0.947632	1.38916	1.23742	1.58322	1.5277	1.37951	1.08938	1.63577	1.1346	0.8522	2.05747	0.681135	1.53816	1.08981	1.11856
1258.57	0.91767	0.700607	0.442325	0.589338	0.803239	0.628722	0.857617	0.531179	0.160205	0.741148	1.85293	0.939375	1.72168	1.85993	2.09045	1.41002	1.5976	1.69513	1.51545	1.79791	1.74289	1.64952	1.70812	1.33213	1.53495	2.01673	2.17445	2.05075	1.7825	1.83705	0.78322	1.0487	0.95651	0.960053	0.797873	1.3522	1.12595	1.51224	1.39498	1.29593	1.29455	1.96714	0.885575	0.991285	1.87221	0.576304	1.77132	1.23283	1.07324
1257.49	1.20016	0.853039	0.667504	0.845606	0.734872	0.728402	0.895816	0.643338	0.155167	0.695631	1.78915	0.999612	1.7498	1.77269	2.05503	1.36821	1.46542	1.60496	1.48753	1.70481	1.70715	1.5498	1.60841	1.30171	1.38312	1.90705	2.03535	1.96426	1.7002	1.71613	0.612712	0.932377	0.817298	0.810403	0.667713	1.30472	1.04853	1.45348	1.27846	1.16769	1.2083	2.23575	0.642203	0.944943	1.6601	0.63976	1.93542	1.36787	0.814927
1256.41	2.03428	0.856805	0.547771	0.907126	0.51718	0.682024	0.73025	0.74279	0.102923	0.771889	1.69293	1.06167	1.68504	1.68744	1.97563	1.28845	1.30345	1.50363	1.40781	1.60508	1.53851	1.45882	1.43607	1.23631	1.30507	1.77354	1.90364	1.83865	1.61653	1.61773	0.510038	0.860075	0.738778	0.744007	0.695562	1.19728	0.980275	1.38721	1.18359	1.00939	1.18712	2.2748	0.577216	0.817277	1.39842	0.785968	1.65695	1.15045	1.13994
1255.34	1.9899	1.03144	0.60218	0.9556	0.344267	0.615384	0.601746	0.887562	0.346658	0.948658	1.62914	1.07901	1.66639	1.57442	1.83453	1.33353	1.26703	1.42541	1.32834	1.52607	1.40721	1.41512	1.28008	1.21278	1.31066	1.65296	1.78232	1.64091	1.55233	1.56166	0.515269	0.814453	0.835436	0.713267	0.688861	1.07173	0.921436	1.31368	1.12572	0.897861	1.21946	2.14146	0.68662	1.03731	1.2018	1.05357	1.59718	1.37839	1.47339
1254.26	1.3609	0.997622	0.599161	0.698653	0.488184	0.602306	0.601188	1.01448	0.495769	0.989343	1.50317	1.01382	1.59369	1.52605	1.80085	1.26821	1.18833	1.37151	1.26709	1.44796	1.28161	1.26084	1.05591	1.15444	1.18613	1.52205	1.65387	1.49615	1.45938	1.47018	0.448594	0.777884	0.796393	0.667919	0.671176	0.915531	0.808984	1.19184	1.09323	0.791396	1.25837	1.83878	0.792887	1.19421	1.35075	0.840836	1.25314	1.19015	1.40472
1253.18	0.490202	0.613069	0.585465	0.639117	0.632338	0.360123	0.577261	1.06979	0.625181	0.962447	1.33289	0.919664	1.4695	1.41536	1.68531	1.13762	1.10147	1.39722	1.12902	1.32644	1.11595	1.11513	1.02244	1.1049	1.042	1.38861	1.52458	1.35252	1.36472	1.35195	0.413699	0.735123	0.695797	0.597356	0.587273	0.810833	0.708057	1.05437	1.04892	0.73529	1.20954	1.21564	0.953852	1.06999	1.69383	0.704741	1.07769	1.0173	1.19555
1252.11	0.421694	0.580853	0.525219	0.73413	0.70794	0.431955	0.676294	0.990819	0.910138	0.979616	1.28243	0.864957	1.3035	1.36836	1.56491	1.08763	0.997337	1.32462	1.11998	1.22383	1.00703	0.977486	0.992788	1.06121	1.01002	1.27121	1.37702	1.32896	1.2933	1.23351	0.420045	0.665739	0.665176	0.598822	0.490729	0.759207	0.669349	0.957589	0.999789	0.663955	1.05208	1.04613	1.08305	1.05932	1.89462	0.475823	1.05629	0.825825	1.05708
1251.03	0.750319	0.659416	0.619764	0.74084	0.844607	0.44917	0.728716	0.863766	0.847428	0.944285	1.23118	0.83225	1.23589	1.32238	1.44595	0.919342	0.988982	1.2207	1.09529	1.12405	0.981473	0.887982	1.00235	0.989969	1.02338	1.17717	1.28772	1.3222	1.25849	1.1144	0.425026	0.635632	0.590502	0.56172	0.382386	0.730434	0.634678	0.866429	0.92053	0.60549	1.03088	0.758964	0.999904	0.909819	1.81742	0.439229	0.939072	0.875696	0.718811
1249.95	1.20844	0.809396	0.635825	0.74233	0.654458	0.338708	0.583833	0.572805	0.552875	0.838267	1.23277	0.858885	1.1959	1.31238	1.39522	0.832176	0.896226	1.1401	1.09787	1.05991	0.932698	0.908286	0.874914	0.978336	0.979626	1.11569	1.22004	1.35069	1.21028	1.02857	0.386785	0.608859	0.654731	0.534463	0.426807	0.704274	0.639815	0.847983	0.868339	0.563232	0.874499	1.18598	1.08752	0.524458	1.40353	0.361809	0.86396	0.699779	0.394062
1248.87	1.13564	1.00223	0.637121	0.851194	0.395436	0.299682	0.451786	0.538356	0.412882	0.57817	1.24313	0.883885	1.24389	1.28926	1.33416	0.847519	0.936104	1.0674	1.08455	1.07187	0.948797	0.958044	0.748177	0.947304	0.901155	1.11185	1.19852	1.31787	1.20086	1.03761	0.412845	0.612897	0.705465	0.520076	0.485572	0.716233	0.639151	0.823716	0.832411	0.577126	1.2097	1.18806	0.995869	0.689405	1.05877	0.705855	0.548863	0.885628	0.523328
1247.79	1.26762	0.976427	0.524974	0.661958	0.17524	0.259749	0.280683	0.487574	0.131697	0.4778	1.16249	0.882249	1.31329	1.25282	1.42792	0.862677	0.949671	1.09766	1.05893	1.14301	0.956894	0.894739	0.644649	0.878548	0.879573	1.14795	1.2349	1.27576	1.19756	1.11925	0.430575	0.63548	0.797374	0.557822	0.571598	0.741419	0.652848	0.872075	0.879566	0.647329	1.337	1.62416	1.01717	0.878371	1.05568	0.77192	0.477982	0.966695	0.550441
1246.71	1.5883	0.799987	0.364404	0.806054	0.112065	0.251024	0.256229	0.702741	0.186839	0.323195	1.24578	0.929004	1.42639	1.24272	1.52595	0.960493	0.896186	1.19395	1.01277	1.17482	0.957131	0.941929	0.655351	0.912001	0.960514	1.23227	1.30219	1.26376	1.31043	1.21534	0.478977	0.689397	0.755821	0.62393	0.653554	0.795898	0.673744	0.974703	0.95705	0.721014	1.42021	1.36656	1.22121	0.940234	1.27009	0.892381	0.900083	1.07153	0.680964
1245.64	2.07265	0.715118	0.136925	0.829933	0.204471	0.331516	0.399039	0.564862	0.530625	0.401729	1.32721	0.98769	1.41573	1.28406	1.58045	1.00681	0.807015	1.22769	1.01673	1.19236	0.948231	0.859678	0.575015	0.852963	1.0142	1.30837	1.3568	1.30953	1.35945	1.28759	0.550737	0.684399	0.74775	0.673319	0.679742	0.870899	0.765457	1.05683	1.01349	0.773314	1.31308	1.48901	0.889749	0.968341	1.65355	1.38614	1.00873	1.18879	0.666802
1244.56	2.22478	0.550158	0.234515	0.77358	0.388611	0.318263	0.389751	0.636807	0.685994	0.459847	1.49053	0.996958	1.44658	1.36366	1.51138	1.00816	0.828639	1.27845	1.02299	1.1684	0.91091	0.824691	0.527886	0.895759	1.02545	1.37948	1.45776	1.38007	1.40407	1.34458	0.618157	0.716113	0.709966	0.678766	0.73099	0.983245	0.818849	1.12914	1.0795	0.823741	1.46654	1.32652	0.531072	1.04229	1.54901	1.23585	1.17352	1.2374	1.02446
1243.48	1.85585	0.40498	0.299488	0.749793	0.459401	0.310497	0.427845	0.480982	0.639267	0.475099	1.62691	1.08927	1.53331	1.45076	1.48501	1.06277	0.912365	1.30657	1.07399	1.13669	0.926716	0.930816	0.532735	1.02151	1.00903	1.45965	1.55055	1.52963	1.41918	1.42636	0.69815	0.785735	0.821569	0.669783	0.794272	1.11484	0.913816	1.24389	1.18147	0.917528	1.27945	1.47149	0.736112	0.861512	1.47471	0.948948	1.12061	1.25943	0.778889
1242.4	1.75553	0.376682	0.283549	0.500648	0.440319	0.253547	0.261779	0.544086	0.572817	0.475596	1.73759	1.13194	1.62067	1.51459	1.52541	1.06852	1.12558	1.34757	1.12745	1.21056	1.00316	1.08767	0.574793	1.01996	0.974093	1.63297	1.68832	1.68231	1.49518	1.58703	0.837975	0.849693	0.864435	0.603722	0.86615	1.28709	1.06573	1.36013	1.27059	1.00349	1.34113	1.058	1.10146	1.26416	1.32348	0.616342	0.684992	1.05548	0.743255
1241.32	1.46911	0.49637	0.25124	0.451293	0.279293	0.238809	0.298567	0.529116	0.430357	0.611931	1.85284	1.14333	1.76411	1.6032	1.70488	1.11907	1.33836	1.50813	1.21184	1.33296	1.23185	1.24155	0.814715	1.06988	1.07629	1.8561	1.86472	1.89912	1.64433	1.79648	0.961664	0.984602	0.884604	0.691815	0.955539	1.49368	1.23523	1.57816	1.44349	1.17981	1.38298	1.51258	1.40923	1.4357	1.1691	0.304965	0.600526	0.769512	0.516714
1240.24	1.5924	0.549986	0.313658	0.536633	0.160794	0.192327	0.331275	0.701326	0.244765	0.43556	1.95622	1.17166	1.91285	1.68095	1.97941	1.28761	1.53384	1.62566	1.34437	1.54859	1.45454	1.39351	0.997289	1.12959	1.2953	2.13856	2.11108	2.14791	1.90595	1.9761	1.08035	1.19024	0.935471	0.83316	1.08034	1.68402	1.42061	1.80313	1.6645	1.35365	1.3301	1.3607	1.64042	1.72331	1.03624	0.180223	1.08634	0.611817	0.399001
1239.16	1.31383	0.743918	0.350996	0.644626	0.184212	0.244566	0.673859	0.9322	0.266993	0.432371	1.97215	1.15069	1.91955	1.76435	2.18043	1.39358	1.65532	1.6379	1.40442	1.67427	1.5221	1.38468	1.15171	1.14303	1.40681	2.41707	2.32159	2.37011	2.14427	2.10867	1.14988	1.27577	1.07593	0.922954	1.15075	1.8901	1.60167	1.95471	1.79119	1.46476	1.24746	1.48187	1.35863	1.40712	0.956705	0.673691	0.983076	0.597313	0.224554
1238.08	1.66066	0.730624	0.371051	0.758184	0.306691	0.308975	0.770909	1.03533	0.3008	0.299277	2.14281	1.17301	2.03313	1.92171	2.25093	1.56445	1.72799	1.70874	1.51528	1.79766	1.63861	1.43406	1.31155	1.33011	1.54568	2.64614	2.578	2.66004	2.40577	2.31282	1.2019	1.40839	1.29058	1.08696	1.31742	2.14473	1.73301	2.16559	2.03511	1.57624	1.14371	1.37139	0.983977	1.25775	0.956933	0.884547	1.12628	0.735395	0.540014
1237	1.27977	0.355322	0.434997	0.808234	0.465519	0.353019	0.816088	0.92549	0.245386	0.134837	2.26121	1.20803	2.20535	2.1108	2.29855	1.70877	1.89401	1.78648	1.57847	1.91781	1.70684	1.54519	1.5001	1.49555	1.73617	2.85577	2.85108	2.99517	2.64805	2.55559	1.33642	1.53617	1.41247	1.21659	1.47424	2.3942	1.90748	2.35629	2.26018	1.68895	1.05601	1.3753	0.969177	1.02162	1.32578	1.11917	1.26058	1.04403	0.4932
1235.91	1.20357	0.121912	0.383811	0.475637	0.46404	0.31229	0.459916	0.769399	0.150088	0.114116	2.47045	1.23556	2.36316	2.22862	2.41679	1.79685	1.99812	1.95315	1.5663	2.13	1.79094	1.64934	1.69717	1.56452	1.91971	3.15312	3.12396	3.2904	2.87118	2.77705	1.43625	1.64983	1.52124	1.2714	1.57746	2.60162	2.13447	2.56104	2.45131	1.84367	1.15244	1.40197	1.50538	1.14682	1.52677	1.22236	1.17517	1.04365	0.880018
1234.83	0.498272	0.136174	0.268112	0.300358	0.269869	0.321905	0.192205	0.586563	0.134129	0.267264	2.67549	1.27948	2.55022	2.36446	2.52222	1.87901	2.05116	2.10242	1.57728	2.23116	1.92368	1.74252	1.99445	1.62516	2.02209	3.44099	3.40026	3.51165	3.08103	3.07127	1.48466	1.80763	1.49499	1.37458	1.61693	2.82697	2.2991	2.8038	2.66816	2.05095	1.38061	1.72849	1.90249	1.34357	1.69958	0.963968	1.27253	1.1354	1.16346
1233.75	0.551857	0.200075	0.381005	0.135182	0.210957	0.15138	0.103027	0.432212	0.181996	0.364664	2.68444	1.31738	2.59074	2.31885	2.62258	1.97813	2.13281	2.20888	1.5789	2.33524	1.97213	1.6537	2.11318	1.60519	2.09868	3.68708	3.67455	3.68027	3.21779	3.19574	1.53038	1.96842	1.43286	1.34378	1.60388	2.98439	2.48015	2.94358	2.84849	2.22952	1.49517	1.75009	2.02574	1.79988	1.9907	0.806274	1.73526	1.20734	1.58637
1232.67	0.154735	0.382655	0.450157	0.114594	0.0663166	0.24195	0.255601	0.577368	0.389706	0.38815	2.75101	1.35468	2.61038	2.36781	2.65436	2.08846	2.31965	2.23556	1.55741	2.37229	2.00128	1.63949	2.13489	1.64075	2.1757	3.943	3.91267	3.85442	3.37452	3.32136	1.57904	2.04532	1.58077	1.41732	1.63908	3.18776	2.68319	3.14501	2.93777	2.34867	1.69365	1.74902	1.74999	1.72034	2.03911	0.950013	1.58704	1.3259	1.42168
1231.59	0.81962	0.625432	0.385682	0.330332	0.271511	0.320959	0.353457	0.686322	0.647629	0.419094	2.93241	1.44122	2.76902	2.47928	2.7554	2.26696	2.43622	2.25887	1.61086	2.58358	2.18009	1.76098	2.1879	1.82028	2.30278	4.24955	4.25407	4.15518	3.60515	3.55495	1.74523	2.19059	1.79689	1.67909	1.78434	3.39667	2.86795	3.41156	3.18904	2.50021	1.57402	1.7489	1.41736	1.89729	2.30431	1.23511	1.84335	1.25524	1.33073
1230.5	1.16538	0.675025	0.640926	0.546855	0.493117	0.444498	0.359928	0.836275	0.885795	0.377519	3.05743	1.48797	2.99172	2.62296	2.87667	2.4145	2.65614	2.41231	1.65434	2.75934	2.36506	1.9964	2.36271	2.02833	2.44496	4.56525	4.58732	4.50962	3.85464	3.80874	2.00095	2.41583	2.0343	1.91203	1.98292	3.60168	3.1215	3.62887	3.39365	2.61779	1.43553	1.88746	1.42439	1.53666	2.21912	1.65128	2.06438	1.0532	0.994535
1229.42	1.33388	0.538577	0.61305	0.544213	0.662856	0.429647	0.416413	0.858903	0.748088	0.367908	3.32596	1.56835	3.07543	2.68897	3.01011	2.62311	2.78749	2.52213	1.64221	3.00082	2.55198	2.20548	2.578	2.23156	2.51098	4.85944	4.88972	4.80526	4.08722	4.03829	2.17354	2.60895	2.23884	2.21033	2.21423	3.7642	3.28806	3.83358	3.60942	2.84834	1.38272	2.1436	1.77523	1.26586	2.04392	1.91262	2.02146	0.976165	1.06372
1228.34	0.922353	0.647326	0.542397	0.596318	0.666899	0.477796	0.482836	0.902894	0.446995	0.445706	3.41339	1.55697	3.17014	2.77596	3.13076	2.81606	2.92399	2.63566	1.63258	3.13598	2.6858	2.3416	2.79891	2.42291	2.53664	5.08271	5.14368	4.96951	4.33921	4.36823	2.42876	2.86864	2.3833	2.41163	2.4377	3.92143	3.43889	3.9596	3.80721	3.08789	1.24085	2.16283	2.36478	1.40196	1.87793	1.85142	2.4769	0.968794	1.14066
1227.26	1.2035	0.846042	0.655447	0.678796	0.924149	0.648546	0.836241	0.968933	0.496876	0.826921	3.42221	1.56816	3.10877	2.72817	3.19798	2.97456	3.03117	2.72015	1.62086	3.26762	2.81563	2.37503	2.98794	2.58853	2.57054	5.22178	5.35062	5.12745	4.45652	4.51737	2.69327	3.1422	2.56616	2.46824	2.69302	4.04742	3.54673	3.99937	3.92379	3.28565	1.28122	1.99511	2.43877	1.38286	2.17855	1.71931	2.8733	0.919349	1.22839
1226.17	1.09086	0.975581	0.811497	0.706758	0.883725	0.855659	1.02785	1.13154	0.435659	1.02556	3.41495	1.57904	2.97036	2.78796	3.18709	3.14964	3.10307	2.75714	1.5966	3.42136	2.96409	2.30879	2.96956	2.69187	2.63425	5.3157	5.41209	5.17573	4.53299	4.60524	2.92325	3.36304	2.91535	2.65607	2.94663	4.1537	3.63821	4.11766	4.0161	3.42594	1.3796	1.94963	1.98503	1.43104	2.54307	1.40814	2.43677	0.967092	1.37373
1225.09	1.22222	1.0324	0.934047	0.901024	0.900265	0.843403	0.953874	1.20816	0.325395	1.11079	3.23874	1.52134	2.85499	2.69228	3.19079	3.18283	3.02581	2.72267	1.5839	3.52585	2.99214	2.2695	2.79308	2.72885	2.66994	5.35216	5.40734	5.22787	4.53217	4.66401	3.08887	3.58026	3.08273	2.84484	3.13127	4.13206	3.65173	4.13175	4.01042	3.47294	1.40078	1.98084	1.69358	1.81053	2.79391	1.37923	2.46153	1.09397	1.4444
1224.01	1.29528	1.01629	1.11073	1.0223	0.841989	0.899065	0.92438	1.21006	0.500451	1.2493	3.04319	1.49283	2.80674	2.62567	3.07598	3.16106	2.90329	2.71077	1.55002	3.49145	2.97336	2.18107	2.67042	2.73187	2.70645	5.3055	5.28878	5.14146	4.42202	4.56954	3.15342	3.7357	3.28054	2.93279	3.16515	4.05131	3.64752	4.06294	3.93071	3.4455	1.41826	1.82699	1.49684	1.85165	2.52713	1.71713	1.93792	1.18816	1.5946
1222.92	1.13263	0.822032	0.95029	0.867899	0.749536	0.777654	0.840936	1.10068	0.555664	1.22263	2.9066	1.46391	2.66514	2.46531	2.84945	3.05337	2.75076	2.54819	1.50583	3.34619	2.91518	2.06936	2.57515	2.60461	2.56665	5.05586	5.06408	4.94897	4.34664	4.4181	3.04679	3.66636	3.34015	2.93699	3.12821	3.87608	3.53934	3.94131	3.8079	3.40304	1.37454	1.79044	1.65788	2.0672	2.2633	1.84385	1.81911	1.30184	1.71388
1221.84	1.07342	0.638522	0.653129	0.633701	0.694511	0.640027	0.899026	1.09909	0.51581	1.12542	2.70005	1.33984	2.47484	2.28998	2.63736	2.88138	2.57674	2.31126	1.35998	3.08636	2.70213	1.87821	2.37759	2.41276	2.35154	4.74024	4.76808	4.63853	4.20371	4.21684	2.9202	3.55128	3.19633	2.79802	2.98807	3.58802	3.33657	3.69125	3.61638	3.25963	1.59899	2.05483	2.21043	2.22801	1.98995	2.16315	2.50822	1.25277	1.64899
1220.75	0.926129	0.565839	0.500236	0.430502	0.631565	0.642705	0.978296	1.01025	0.51323	1.02177	2.48394	1.20546	2.2768	2.12549	2.40515	2.73268	2.37728	2.10235	1.26028	2.84757	2.51823	1.71722	2.3274	2.24703	2.26193	4.38704	4.43646	4.32494	3.97629	3.96685	2.89116	3.42017	3.08687	2.60736	2.8728	3.28765	3.07548	3.38163	3.38474	3.12352	1.57959	2.32168	2.42568	2.20373	1.93733	2.13696	2.62188	1.1703	1.45309
1219.67	0.756393	0.707289	0.560086	0.293589	0.671547	0.678407	1.05109	0.990919	0.617708	1.01888	2.22983	1.07046	1.97575	1.9283	2.1853	2.56189	2.15293	1.91291	1.19446	2.63611	2.22425	1.58928	2.27508	2.06748	2.07127	3.99805	4.01824	3.903	3.78436	3.69589	2.7926	3.22373	2.98696	2.45596	2.68982	2.96224	2.7954	3.07591	3.14305	2.94681	1.84221	2.36228	2.38227	2.12055	2.21892	1.7434	2.16397	0.944751	1.45686
1218.58	0.582651	0.748844	0.476095	0.37475	0.495896	0.634462	0.952886	0.711067	0.647053	0.66458	1.90262	0.858356	1.71195	1.64704	1.96439	2.32848	1.86986	1.73111	1.13503	2.40409	1.8602	1.52439	2.02176	1.88617	1.8469	3.63847	3.61165	3.53328	3.48083	3.43885	2.66233	3.06875	2.57191	2.27868	2.50199	2.58363	2.45955	2.72228	2.80124	2.65898	1.88977	2.49312	2.22555	1.81753	2.26539	1.47844	2.14518	1.02221	1.03691
1217.5	0.761448	0.690079	0.636551	0.691977	0.417628	0.615835	1.02882	0.514834	0.874551	0.621679	1.70948	0.757819	1.58742	1.4725	1.75372	2.22138	1.62482	1.5918	1.08838	2.28488	1.63475	1.46186	1.83761	1.7757	1.66914	3.31683	3.25815	3.17056	3.16234	3.18777	2.43419	2.9023	2.25072	2.0912	2.33035	2.28183	2.221	2.40964	2.55425	2.48839	1.73125	2.13574	1.76765	1.49153	2.06518	1.38749	1.46451	1.19149	1.09709
1216.41	1.20918	0.908633	0.539511	0.857824	0.483595	0.599866	0.783587	0.522213	1.20429	0.628073	1.57696	0.687979	1.48076	1.25591	1.54872	1.96234	1.44765	1.44718	1.04356	2.05711	1.49805	1.40342	1.74353	1.6386	1.4599	2.91816	2.95253	2.92072	2.96054	2.96097	2.15325	2.64377	1.98332	1.86044	2.14684	2.0194	2.00536	2.16785	2.3096	2.27601	1.44725	2.00522	1.65028	1.34543	1.95085	1.23657	1.24758	1.2084	1.09454
1215.33	1.82677	1.17303	0.349863	0.739964	0.635877	0.614807	0.631556	0.726652	1.14271	0.644207	1.48897	0.601128	1.35231	1.12441	1.38672	1.77563	1.30162	1.28653	0.970715	1.81746	1.41779	1.31264	1.58551	1.43172	1.2927	2.62319	2.72497	2.67704	2.67389	2.67989	1.88344	2.43046	1.7375	1.60448	2.04389	1.76799	1.77711	1.95929	2.09461	2.07645	1.19818	1.96044	1.48414	1.22915	1.66554	1.41824	1.29106	1.11444	1.15266
1214.24	1.57198	1.27876	0.311969	0.466135	0.560197	0.406341	0.399879	0.635552	0.654899	0.722916	1.45361	0.554507	1.27621	1.08269	1.28356	1.50376	1.15055	1.23349	0.921482	1.60698	1.37818	1.17741	1.42368	1.2887	1.22506	2.37674	2.47912	2.50787	2.45985	2.47995	1.75504	2.23685	1.70065	1.47585	1.96497	1.59493	1.59072	1.74393	1.92125	1.95545	0.826341	1.71553	1.48461	1.41472	1.37281	1.35787	0.974461	0.886656	1.19575
1213.16	0.81749	1.23629	0.368878	0.243431	0.583298	0.386832	0.335633	0.836103	0.437834	0.801524	1.39697	0.586603	1.23131	1.07667	1.28596	1.34804	1.09152	1.14198	0.973826	1.46891	1.29731	1.18719	1.48836	1.19632	1.12964	2.22699	2.28404	2.3372	2.39876	2.34581	1.72921	2.09356	1.90562	1.41541	1.89541	1.48174	1.46374	1.60562	1.77936	1.88838	1.03758	1.10299	1.29267	1.2543	1.30107	1.17024	0.576988	0.660863	1.17017
1212.07	0.193612	0.969271	0.261805	0.0809892	0.499109	0.337912	0.30577	0.78956	0.15386	0.505722	1.27804	0.605041	1.17126	1.05963	1.27946	1.20434	1.04274	1.00848	1.00564	1.51333	1.2611	1.25794	1.51056	1.12198	1.07074	2.15686	2.18212	2.16428	2.29614	2.25834	1.7696	2.02013	1.9448	1.41296	1.8042	1.35852	1.36928	1.50189	1.62036	1.75269	0.961767	0.940485	1.22281	0.983538	1.18223	0.82925	0.702668	0.453188	0.944002
1210.98	0.0208758	0.71626	0.400452	0.211313	0.389908	0.225364	0.481367	0.548387	0.060078	0.363551	1.27346	0.665346	1.11902	1.01827	1.23865	1.28183	0.978343	0.900247	1.00286	1.5579	1.21779	1.26911	1.60428	1.04864	1.06722	2.10867	2.08088	2.11515	2.2154	2.20683	1.80104	2.0028	2.01493	1.41327	1.74517	1.31153	1.35815	1.43249	1.55932	1.72271	0.828848	0.950887	1.23626	0.710236	1.11152	0.513725	0.57244	0.170445	0.892131
1209.9	0.438495	0.623731	0.352589	0.320575	0.328372	0.279047	0.373132	0.308036	0.202149	0.401711	1.30142	0.731597	1.08165	1.03245	1.24611	1.28232	0.983072	0.893648	1.00979	1.5249	1.11406	1.35019	1.6908	1.00105	1.07321	2.01309	2.02451	2.11082	2.14206	2.18884	1.77699	1.96591	1.95452	1.4572	1.6583	1.32634	1.351	1.4204	1.52256	1.67869	0.844777	0.972436	1.11951	0.772958	1.25394	0.611947	0.989129	0.155049	0.763168
1208.81	0.743179	0.641485	0.281502	0.521261	0.328881	0.3103	0.282	0.16845	0.385725	0.502175	1.30874	0.74443	1.10613	1.09954	1.2306	1.38204	1.08712	0.965491	1.02214	1.44534	1.16378	1.37173	1.73519	0.956455	1.03623	2.00038	2.02435	2.1319	2.01997	2.17583	1.7301	1.97648	1.96088	1.46327	1.7102	1.31873	1.36134	1.42052	1.53288	1.68171	0.799482	1.3442	0.852976	0.869683	1.34911	0.870393	1.16676	0.103356	0.691961
1207.72	1.31007	0.974697	0.369509	0.711035	0.443682	0.453622	0.389266	0.309619	0.687903	0.893165	1.40672	0.786365	1.21067	1.17252	1.2603	1.34149	1.19773	1.14494	1.05814	1.44629	1.23067	1.40937	1.71941	1.07065	1.09051	1.99681	2.02837	2.19544	1.96973	2.25074	1.72803	2.00829	2.05791	1.67911	1.74912	1.35009	1.37326	1.4903	1.58935	1.7172	0.917148	1.05059	0.743703	1.025	1.55057	1.04621	1.39552	0.176905	0.462165
1206.63	1.25264	1.06609	0.617998	0.926418	0.515233	0.709905	0.548228	0.696612	1.03793	1.02181	1.56432	0.898056	1.40286	1.36809	1.39457	1.43098	1.33611	1.33145	1.17992	1.52297	1.42565	1.4449	1.96109	1.21515	1.15068	2.06491	2.12931	2.33936	2.03818	2.33739	1.8389	2.10378	2.27827	1.85829	1.85438	1.45475	1.43568	1.64316	1.68742	1.78414	0.999144	0.626701	0.645099	1.23414	1.64401	0.750681	1.17065	0.458929	0.389631
1205.55	1.68456	1.21795	0.896268	0.880888	0.648807	0.849821	0.708705	0.972636	1.2195	1.29287	1.6798	1.03648	1.54612	1.52807	1.54863	1.51213	1.45948	1.44847	1.28171	1.61205	1.6366	1.66041	2.07829	1.37707	1.20659	2.17368	2.29307	2.41567	2.14423	2.40372	1.96768	2.19298	2.30294	2.06738	1.92941	1.56881	1.55161	1.75973	1.75232	1.80354	1.02493	0.656846	0.745072	1.40173	1.70673	0.56444	1.11634	0.577965	0.40872
1204.46	1.93964	1.56136	1.00062	0.738929	0.77419	0.837932	0.989548	0.858935	1.16815	1.3657	1.86178	1.18896	1.7198	1.74518	1.66131	1.76688	1.51934	1.56484	1.45487	1.72566	1.86173	1.78189	2.24163	1.5623	1.32759	2.29942	2.3946	2.57472	2.26135	2.45986	2.17242	2.30565	2.5004	2.33073	2.06827	1.72632	1.68603	1.86084	1.87244	1.83071	0.859758	0.961093	1.03154	1.35474	1.76405	0.687801	1.14691	0.556775	0.839786
1203.37	1.86461	1.49136	1.10435	0.572442	0.770851	0.82841	0.903618	0.594533	1.03477	1.38703	2.09394	1.35709	1.93312	2.02846	1.87746	1.93789	1.61516	1.69818	1.62181	1.94191	2.0085	2.06932	2.39259	1.7364	1.51435	2.41539	2.53038	2.71513	2.41833	2.55937	2.33495	2.47029	2.59424	2.55257	2.24333	1.87078	1.81615	1.96945	2.03385	1.89971	0.647755	1.35995	1.34264	1.43032	1.71012	0.981468	1.49835	0.785857	1.19835
1202.28	1.35358	1.19438	0.921189	0.571765	0.781193	0.553599	0.693867	0.348438	0.987329	1.15703	2.25186	1.46008	2.16428	2.22959	2.0419	2.05001	1.75012	1.75931	1.76427	2.13	2.14306	2.302	2.43548	1.88603	1.63629	2.54801	2.61732	2.75666	2.51968	2.70456	2.46746	2.61501	2.71462	2.74928	2.45277	1.95614	1.8714	2.03142	2.17661	1.95118	0.456823	2.1456	1.15887	1.42241	1.51293	1.13633	1.3541	0.717329	1.03046
1201.19	1.6132	1.22088	0.824417	0.629665	0.897838	0.608603	0.596546	0.57662	1.05601	1.05211	2.36824	1.47838	2.3046	2.35816	2.21084	2.14963	1.93986	1.86468	1.89884	2.3451	2.23109	2.44513	2.63294	2.08183	1.9022	2.66176	2.70961	2.81315	2.60052	2.81433	2.6387	2.77561	2.83586	3.01725	2.64076	2.00784	1.95029	2.15427	2.29469	2.03452	0.327959	2.14309	1.21018	1.37639	1.49955	1.14485	1.45413	0.82119	0.907625
1200.1	1.54744	1.03182	0.798759	0.634544	0.760963	0.690639	0.613306	0.747684	0.943933	0.734462	2.5143	1.47515	2.44264	2.45819	2.37939	2.24389	2.00067	1.94113	1.95496	2.48996	2.35107	2.45172	2.87553	2.17978	2.06547	2.72146	2.79702	2.86985	2.66326	2.94624	2.75962	2.92563	3.00857	3.16679	2.7933	2.06576	1.99845	2.27639	2.33585	2.11361	0.144284	2.09441	1.46187	1.2862	1.20089	0.917453	1.30585	0.661713	0.831835
1199.01	1.90139	1.14158	1.07709	0.600933	0.906799	0.972257	0.962715	1.05339	0.893807	0.966433	2.5474	1.43407	2.52007	2.44402	2.48007	2.34367	2.05194	1.95236	1.93712	2.48106	2.36085	2.47862	2.91299	2.17723	2.05099	2.74338	2.84328	2.8916	2.72761	2.93204	2.83873	3.02617	2.95771	3.28945	2.89797	2.06914	2.03901	2.33022	2.32198	2.1693	0.18231	2.0274	1.39705	1.33823	1.16946	0.927456	1.54868	0.694551	0.673819
1197.92	2.04176	1.25382	1.06504	0.462655	0.87515	0.866951	0.939277	1.00831	0.65839	0.940104	2.42111	1.41054	2.50422	2.45005	2.49552	2.48458	2.09267	1.98134	1.90981	2.53909	2.45835	2.28919	2.95003	2.21592	2.05454	2.74685	2.84836	2.86546	2.72098	2.89371	2.91687	3.07629	3.09784	3.42392	2.9752	2.05423	2.06898	2.34322	2.24595	2.15128	0.251907	1.79792	1.14495	1.46364	1.32188	1.22596	1.54843	0.618273	0.772754
1196.84	1.4382	1.17416	1.20616	0.66534	0.967897	0.863541	0.785291	0.868759	0.687736	1.31267	2.36352	1.38575	2.40808	2.44312	2.46993	2.46559	2.0843	2.00588	1.81298	2.53486	2.37567	2.26919	2.86091	2.26081	2.0557	2.69846	2.79365	2.77978	2.69262	2.78941	2.87706	3.05924	3.11815	3.44766	2.99921	1.97805	2.06427	2.28947	2.18304	2.04634	0.423757	1.72654	0.924964	1.37862	1.19113	1.16134	1.5811	0.825606	0.630993
1195.75	1.14135	1.01162	1.0732	0.838562	1.01668	0.771775	0.697733	0.802899	0.819645	1.36802	2.29106	1.33777	2.29581	2.33938	2.39692	2.34314	2.00645	1.93281	1.74315	2.45859	2.31987	2.25218	2.65225	2.18316	1.96789	2.59131	2.68142	2.60711	2.58935	2.67681	2.83304	3.02254	3.13392	3.3948	2.89786	1.88998	1.98896	2.17733	2.09401	1.93899	0.512796	1.58814	0.435859	0.992765	1.14978	1.07898	1.44403	0.975991	0.51155
1194.66	1.33581	1.12109	1.00549	0.971846	1.08578	0.900655	0.815126	0.756519	1.05687	1.42499	2.25202	1.27902	2.1279	2.27	2.30705	2.18616	1.98005	1.87181	1.66363	2.37482	2.26334	2.10095	2.58446	2.09566	1.93488	2.51169	2.60401	2.46891	2.48052	2.51505	2.8509	2.97706	3.03843	3.29419	2.79831	1.78195	1.9419	2.11049	2.01067	1.83689	0.490963	1.36415	0.412143	0.610625	1.40144	0.951226	1.24064	1.11741	0.649015
1193.56	1.0946	1.21035	0.871287	1.01904	0.992328	0.894016	1.00744	0.681601	1.08516	1.18311	2.27731	1.21742	2.04849	2.17796	2.22401	2.01589	1.81022	1.84803	1.59361	2.27983	2.22897	2.10708	2.43197	1.97745	1.90939	2.40569	2.49264	2.35613	2.41218	2.41026	2.75715	2.87733	2.97485	3.18031	2.70237	1.70231	1.89177	2.01567	1.95041	1.80614	0.701337	1.2699	0.618654	0.386312	1.07929	0.984101	0.880546	0.9353	0.598668
1192.47	1.51749	1.52386	0.958507	0.954476	1.17295	1.12832	1.46418	0.922965	1.32392	1.10461	2.15817	1.15315	1.98819	2.05302	2.13067	1.91539	1.74466	1.81491	1.55918	2.22353	2.11672	2.01893	2.2687	1.82162	1.87157	2.29341	2.33909	2.28106	2.36159	2.29883	2.69676	2.78923	2.82173	3.01534	2.6619	1.60756	1.8191	1.89843	1.88753	1.76306	0.692625	1.1814	0.706115	0.57468	0.949128	0.98501	0.601454	0.94176	0.451866
1191.38	1.63651	1.74738	1.0716	0.804788	1.07305	1.08114	1.33918	0.916162	1.4199	1.03587	1.97807	1.15338	1.90327	1.97365	2.05025	1.89098	1.61241	1.75483	1.5168	2.16859	2.04349	1.8092	2.1967	1.78167	1.79393	2.24573	2.20356	2.1314	2.2576	2.17634	2.59845	2.67063	2.72308	2.80158	2.57605	1.53902	1.69592	1.79331	1.80139	1.7063	0.798492	0.893537	0.540337	0.860116	1.14833	0.856786	0.258667	0.692192	0.432414
1190.29	1.70007	1.61113	1.17688	0.945714	1.07251	1.05249	1.24831	1.13045	1.41057	1.2544	1.88785	1.12504	1.78855	1.88318	1.96548	1.87675	1.54755	1.68108	1.50313	2.04976	1.89665	1.80079	2.23869	1.7736	1.70826	2.15835	2.02505	1.96382	2.18894	2.10095	2.45133	2.48762	2.64133	2.58476	2.47467	1.41991	1.56982	1.6776	1.72942	1.58824	1.16911	0.639832	0.531703	0.704819	1.03936	0.631921	0.148165	1.00532	0.356383
1189.2	2.08308	1.16107	1.0228	0.955984	0.830826	0.950862	0.895641	1.17335	1.19762	1.02123	1.71155	1.02577	1.66466	1.7344	1.87308	1.78493	1.42761	1.48382	1.45408	1.89574	1.74337	1.66136	2.21348	1.66586	1.53454	1.96992	1.88818	1.85883	2.04132	1.96373	2.22912	2.32709	2.49433	2.33795	2.26929	1.27282	1.4453	1.54855	1.58629	1.46493	1.07346	0.635848	0.597565	0.455979	1.24761	0.481093	0.283897	1.0798	0.738701
1188.11	2.01127	1.05486	0.843267	0.995705	0.716955	0.909191	0.643686	0.802118	0.856436	0.848685	1.58127	0.913744	1.54608	1.62106	1.75783	1.57073	1.37071	1.29109	1.35676	1.72302	1.52771	1.49748	1.99101	1.53691	1.32632	1.76631	1.75902	1.7007	1.8199	1.75884	2.01024	2.10781	2.18581	2.04023	2.0188	1.09919	1.33577	1.42758	1.42008	1.26349	0.868611	0.675646	0.750188	0.352152	1.6419	0.446068	0.266769	0.824083	1.12301
1187.02	1.49286	1.03718	0.815174	1.06393	0.611071	0.723017	0.617819	0.610107	0.568208	0.729901	1.55901	0.810427	1.45333	1.55299	1.67345	1.4284	1.31072	1.21996	1.29054	1.5786	1.37155	1.45882	1.83816	1.42489	1.24607	1.59815	1.6912	1.60307	1.65759	1.60754	1.80383	1.92062	1.95856	1.91913	1.84851	1.00365	1.27668	1.2976	1.35029	1.21277	0.870939	0.779321	1.00116	0.412237	1.70482	0.555285	0.522775	0.656778	1.09459
1185.92	1.15896	1.03421	0.625404	0.785436	0.649624	0.710079	0.632333	0.497429	0.330433	0.486312	1.44287	0.756498	1.35956	1.44445	1.58729	1.21086	1.28526	1.20853	1.1837	1.48443	1.16853	1.37937	1.68647	1.31251	1.265	1.44248	1.56452	1.48967	1.48658	1.5428	1.69092	1.78277	1.7507	1.77854	1.72352	0.933262	1.16588	1.18351	1.19896	1.10926	0.715787	1.05504	0.947295	0.358292	1.54173	0.698955	0.782631	0.710309	1.01178
1184.83	0.776384	1.31183	0.454082	0.526145	0.626182	0.662176	0.666963	0.457414	0.375714	0.512037	1.35818	0.768003	1.37146	1.34116	1.55395	1.12727	1.18588	1.26116	1.13303	1.38442	1.00543	1.39247	1.6534	1.25855	1.23663	1.36373	1.47071	1.30178	1.31966	1.42457	1.59913	1.659	1.55834	1.63492	1.62434	0.891364	1.07238	1.06871	1.11664	1.07171	0.831956	1.20877	0.781366	0.393953	1.3095	0.798012	1.17402	0.549433	0.731115
1183.74	0.84653	1.28603	0.494506	0.407666	0.58264	0.628992	0.576988	0.690527	0.415212	0.526151	1.35595	0.786264	1.38316	1.27122	1.56395	1.15933	1.17536	1.31298	1.16135	1.35874	1.06661	1.4912	1.6647	1.21517	1.306	1.33831	1.35183	1.18808	1.29196	1.40497	1.59035	1.56728	1.56203	1.55521	1.58212	0.840866	1.00808	1.03472	1.09025	1.07042	1.36544	1.30286	0.529956	0.458742	1.05391	0.985065	1.2303	0.564923	0.396223
1182.65	1.60686	1.18752	0.493454	0.398003	0.578366	0.641102	0.439629	0.873149	0.544565	0.556642	1.33222	0.822469	1.4525	1.31855	1.55827	1.12563	1.04273	1.35639	1.25327	1.35524	1.08441	1.49584	1.62878	1.22999	1.31605	1.27752	1.3063	1.18571	1.2433	1.37873	1.57414	1.53009	1.55787	1.53597	1.53949	0.803653	0.979884	0.996143	1.10021	1.05389	1.37832	1.65348	0.543555	0.769563	1.02381	0.728006	1.05489	0.162849	0.362402
1181.55	1.79645	1.42221	0.53583	0.605173	0.731586	0.728626	0.372238	0.880189	0.841115	0.746756	1.21191	0.866189	1.40591	1.33494	1.62146	1.11971	1.02397	1.38684	1.31644	1.29311	1.10155	1.45452	1.40612	1.24716	1.29679	1.25534	1.23975	1.16849	1.13812	1.31228	1.55258	1.45004	1.54773	1.45347	1.49203	0.780645	0.955422	1.00371	1.12917	1.00557	1.55187	1.61382	0.650038	1.18421	1.17228	0.528782	0.852769	0.113504	0.359658
1180.46	1.97539	1.38069	0.722333	0.663888	0.794653	0.678722	0.556339	1.06055	1.09299	0.869396	1.3767	0.944348	1.43292	1.48813	1.69348	1.28636	1.02864	1.41124	1.42456	1.35766	1.21877	1.46267	1.48885	1.31198	1.31773	1.28927	1.28973	1.2083	1.09868	1.32736	1.63316	1.41836	1.67704	1.50607	1.52398	0.800274	0.942832	1.06187	1.20062	1.0674	1.49718	1.80063	0.819246	1.28559	1.60375	0.591703	1.08482	0.15273	0.590443
1179.37	1.69535	0.97024	0.730443	0.616055	0.845703	0.765725	0.580634	0.97908	0.929976	0.835273	1.45635	1.02459	1.47799	1.56459	1.75317	1.34096	1.04443	1.40429	1.39233	1.4482	1.30522	1.41598	1.60818	1.44057	1.41095	1.29191	1.30466	1.2213	1.07305	1.34595	1.67637	1.38053	1.73792	1.49483	1.51045	0.841389	0.914416	1.11145	1.12745	1.10461	1.53262	1.79652	1.19148	1.33734	1.82826	0.946679	1.17534	0.753095	0.938657
1178.27	1.47093	0.574974	0.369185	0.483455	0.420343	0.547284	0.632899	0.736477	0.743682	0.597704	1.46958	1.11397	1.55169	1.62209	1.80946	1.36456	1.07767	1.40145	1.4028	1.47342	1.23877	1.5257	1.66649	1.48637	1.46907	1.29352	1.32797	1.11595	1.05292	1.3142	1.65334	1.33703	1.63258	1.37626	1.45359	0.832785	0.899051	1.07662	1.08039	1.09534	1.38152	2.05585	1.42157	1.41912	1.74453	1.21474	1.15103	0.838776	0.928016
1177.18	1.4075	0.349161	0.322475	0.558764	0.267897	0.462623	0.468891	0.749171	0.458573	0.352049	1.53296	1.17823	1.61642	1.69011	1.89313	1.43115	1.27085	1.38164	1.39089	1.56986	1.32524	1.62068	1.70634	1.5697	1.53828	1.3285	1.31858	1.12308	1.06564	1.33462	1.53421	1.32995	1.61886	1.2929	1.40572	0.838856	0.885933	1.07543	1.04267	1.12355	1.52472	2.17738	1.15127	1.37503	1.82412	1.33296	1.31087	1.04148	0.914307
1176.09	1.4208	0.38189	0.276408	0.557427	0.286148	0.470116	0.453333	1.03639	0.313661	0.32258	1.60794	1.28591	1.71209	1.77645	1.87761	1.34058	1.29181	1.39423	1.41904	1.61476	1.3297	1.65231	1.65872	1.57304	1.51944	1.31367	1.3116	1.14627	1.04181	1.3967	1.40754	1.35083	1.48043	1.25144	1.28492	0.811617	0.865912	0.984869	1.0332	1.12092	1.34862	2.03095	1.13673	1.64485	1.8377	1.05167	1.27689	1.07217	1.17845
1174.99	1.60046	0.755936	0.522221	0.761416	0.494425	0.614423	0.495378	1.25972	0.604627	0.20959	1.51588	1.32348	1.67221	1.67168	1.86672	1.30545	1.36	1.3936	1.44832	1.5879	1.30787	1.5712	1.56486	1.46911	1.52239	1.26254	1.24717	1.14347	0.990157	1.40048	1.28609	1.28109	1.35897	1.18836	1.20424	0.742006	0.811231	0.928413	1.06575	1.09795	1.56008	1.62498	1.16523	1.74082	1.6949	0.946019	1.35465	1.05361	1.19513
1173.9	1.67082	0.817536	0.617402	0.55775	0.628177	0.560832	0.462825	1.20108	0.712074	0.113685	1.63333	1.35812	1.66189	1.73924	1.87986	1.33696	1.29529	1.43602	1.52507	1.58163	1.31594	1.5485	1.67557	1.38948	1.50627	1.22834	1.21261	1.21886	1.01108	1.39823	1.28142	1.23308	1.34394	1.1858	1.16666	0.685646	0.77243	0.876516	1.05309	1.09409	1.61122	1.5977	1.13204	1.56267	2.1134	1.17333	1.78461	0.871575	1.49297
1172.8	1.69174	0.828771	0.880922	0.521599	0.879732	0.795782	0.670999	1.18546	0.887884	0.434402	1.63468	1.3108	1.63924	1.76629	1.91269	1.28521	1.21758	1.43516	1.57097	1.55865	1.33655	1.43008	1.76837	1.44247	1.53893	1.17876	1.17475	1.22949	0.966399	1.36387	1.26219	1.15673	1.37079	1.13119	1.13112	0.66367	0.7266	0.816382	1.01357	1.07118	1.69274	1.45038	1.29584	1.56404	2.34497	1.69847	1.82393	0.969317	1.75662
1171.71	1.23595	0.804423	0.8285	0.442686	0.712972	0.678647	0.686496	0.892257	0.711506	0.483373	1.56051	1.30546	1.61288	1.82355	1.97331	1.3167	1.14099	1.46964	1.6103	1.50118	1.30915	1.51585	1.7848	1.47159	1.59542	1.15483	1.12717	1.14944	1.00181	1.32192	1.23843	1.07087	1.39964	0.98756	1.12519	0.604737	0.671306	0.784291	0.980201	0.984674	1.79858	1.9166	1.70542	1.46595	2.1235	1.99581	1.65932	0.706676	1.71971
1170.61	0.862236	0.865878	0.618404	0.793915	0.799386	0.657667	0.674265	0.839099	0.718026	0.663993	1.46921	1.26959	1.56281	1.82589	1.9404	1.32581	1.14028	1.44951	1.54245	1.40748	1.20445	1.54748	1.72689	1.48041	1.47638	1.09706	1.05505	1.1171	0.979866	1.22171	1.10433	0.977983	1.29602	0.845163	1.10594	0.560273	0.622489	0.773592	0.89269	0.937237	1.99676	2.63764	1.84493	1.27897	1.72756	1.80324	1.53089	0.906358	1.60687
1169.51	0.827005	0.93738	0.450665	0.820311	0.774757	0.698964	0.607947	0.876173	0.627906	0.919672	1.35636	1.21077	1.4972	1.68602	1.79244	1.15876	1.06456	1.33194	1.45188	1.27482	1.0903	1.48646	1.41324	1.3579	1.30001	0.992758	0.935626	0.994254	0.848002	1.06903	0.947488	0.83308	1.18214	0.743719	0.999171	0.492704	0.551993	0.663167	0.782954	0.85025	1.94986	2.80813	1.88889	1.45903	1.34446	1.41836	1.38964	1.1814	1.74243
1168.42	1.27608	0.914741	0.489199	1.09048	0.661989	0.626345	0.559231	0.943342	0.749155	0.980355	1.24713	1.15692	1.41602	1.51384	1.55343	1.06188	1.02686	1.2032	1.37179	1.21302	1.00018	1.40126	1.20342	1.1782	1.16773	0.835783	0.814996	0.866024	0.722706	0.952126	0.862363	0.736552	1.17026	0.721556	0.927261	0.421989	0.494597	0.590968	0.746906	0.78399	2.10399	2.77435	1.89208	1.66723	1.01635	1.23401	1.16814	1.2741	1.6692
1167.32	0.894778	0.521311	0.145352	0.693678	0.311387	0.336915	0.273244	0.721145	0.494888	0.679286	1.15461	1.12499	1.2689	1.43057	1.38637	0.84849	0.868372	1.0728	1.24121	1.11899	0.870953	1.32412	1.10412	0.967744	1.04987	0.72659	0.70851	0.796895	0.625458	0.865402	0.799491	0.668893	1.09017	0.735184	0.809714	0.354916	0.465891	0.532718	0.672285	0.774217	1.81059	2.56198	1.54843	1.62099	1.3685	1.03309	1.06778	1.42879	1.59653
1166.22	1.35007	0.416178	0.17171	0.495969	0.250404	0.25806	0.479914	0.917654	0.481856	0.711524	1.16123	1.05859	1.13594	1.36608	1.23928	0.692268	0.811062	0.941953	1.19462	1.0258	0.865385	1.10953	0.995416	0.864978	0.976419	0.629231	0.634188	0.676822	0.513375	0.804392	0.719669	0.647815	1.08676	0.69999	0.721632	0.300402	0.419519	0.470155	0.633339	0.713025	1.44193	2.13807	1.02068	1.59189	1.6303	1.09273	1.04673	1.22799	1.60114
1165.13	1.35677	0.483523	0.420412	0.374197	0.213575	0.260577	0.47846	0.988539	0.389687	0.610464	1.13482	1.13135	1.11071	1.34589	1.21393	0.749371	0.798414	0.940503	1.14467	1.0461	0.862728	1.14287	0.958847	0.825786	1.0041	0.6375	0.572199	0.585372	0.57067	0.810283	0.684695	0.668647	1.23175	0.743234	0.717883	0.295948	0.446077	0.441411	0.638602	0.68941	1.57382	1.89436	0.984587	1.524	1.57374	1.32356	1.1909	1.14604	1.37237
1164.03	1.30976	0.714951	0.590936	0.597961	0.295382	0.345461	0.616677	1.10518	0.597618	0.506195	1.14533	1.21505	1.09362	1.29971	1.13874	0.775018	0.766791	0.891388	1.09924	0.976044	0.808415	1.15711	0.991637	0.749663	0.989431	0.642244	0.561695	0.570529	0.632232	0.866633	0.660209	0.707826	1.2343	0.74827	0.73912	0.294636	0.451139	0.411899	0.610787	0.666401	1.60648	1.85023	0.831511	1.61018	1.40652	1.20938	0.932047	0.982386	1.26637
1162.93	1.70143	0.875549	0.846122	0.661763	0.591426	0.754565	0.677906	1.03692	0.699739	0.585711	1.03783	1.2453	1.12732	1.2631	1.12232	0.773968	0.779698	0.832978	1.0718	0.938837	0.802695	1.13812	0.914549	0.812311	0.930696	0.614385	0.538231	0.500334	0.62246	0.837116	0.625704	0.699728	1.25885	0.778807	0.784513	0.360808	0.447875	0.356397	0.596521	0.668278	1.61631	1.87736	0.873951	1.59765	1.31043	1.2228	0.949994	0.774977	1.19781
1161.84	1.68371	0.932838	0.85205	0.864123	0.728398	0.86074	0.71842	1.02739	0.937023	0.718396	0.975038	1.30175	1.16536	1.29547	1.06012	0.80117	0.809931	0.837926	1.06093	0.948782	0.837943	1.10512	0.936301	0.926154	0.891705	0.617151	0.542325	0.52882	0.625931	0.836426	0.704298	0.76175	1.2151	0.784315	0.879904	0.402143	0.483624	0.386412	0.591603	0.691896	1.90718	1.91328	1.01874	1.59312	1.26234	1.02608	0.896742	0.829463	0.883394
1160.74	1.24776	0.716548	0.571088	0.676162	0.644579	0.672337	0.63492	0.79004	0.740442	0.526233	0.853331	1.30871	1.11355	1.30951	0.991861	0.725048	0.791957	0.794826	1.03413	0.883271	0.850088	1.11169	0.967503	0.956014	0.767957	0.638608	0.522604	0.562682	0.574487	0.746005	0.759808	0.727264	1.15116	0.799143	0.873017	0.404883	0.532462	0.43236	0.597936	0.75853	2.14696	1.9917	1.20951	1.11886	1.10468	0.838266	0.763137	0.846531	1.04821
1159.64	1.59811	0.516785	0.396324	0.611237	0.631514	0.536264	0.655324	0.727009	0.785238	0.646409	0.885458	1.28485	0.970233	1.30984	0.961096	0.806864	0.823706	0.83632	1.05085	0.831726	0.937108	0.993696	0.948856	0.974701	0.796442	0.61012	0.501104	0.561664	0.589184	0.689481	0.820056	0.731074	1.18312	0.834835	0.892511	0.405792	0.584308	0.481141	0.627346	0.764301	2.09601	1.97932	1.18866	0.837006	1.28748	0.882381	0.962148	0.732375	0.997187
1158.54	1.89936	0.404745	0.364422	0.42074	0.482941	0.547127	0.581645	0.752353	0.703363	0.626146	0.842021	1.24065	0.950541	1.24267	0.963793	0.869737	0.840447	0.854342	1.0266	0.883886	0.977406	0.95502	0.926714	0.991605	0.852162	0.635741	0.457395	0.64794	0.668335	0.66625	0.88312	0.781841	1.36851	0.938421	0.939655	0.462436	0.664236	0.493977	0.699036	0.81065	2.22449	1.98767	1.20551	0.865314	1.31774	1.09481	1.13778	0.998342	1.18244
1157.44	2.05664	0.552541	0.469461	0.437585	0.349031	0.578091	0.615888	0.953942	0.790033	0.620871	0.817766	1.15953	0.907551	1.12028	0.906058	0.922858	0.856076	0.821541	0.949351	0.903476	1.00714	0.98698	1.0667	0.899127	0.961072	0.606144	0.479185	0.729474	0.799509	0.729969	0.920893	0.834636	1.50873	1.04561	1.02525	0.463587	0.661812	0.51978	0.754344	0.878336	2.16007	1.89228	0.92687	1.28712	1.34585	1.03039	1.15106	0.986664	1.45591
1156.35	1.90096	0.504256	0.599399	0.481514	0.452838	0.675076	0.492347	0.651887	0.8211	0.503305	0.742453	1.03432	0.891486	0.996784	0.886234	0.999118	0.867401	0.764121	0.843785	0.903444	0.98231	0.97395	1.00459	0.904479	1.03841	0.562788	0.480235	0.740268	0.807201	0.735274	0.939927	0.862596	1.48168	1.1359	1.10623	0.511667	0.634835	0.509794	0.746265	0.914014	2.07774	2.14023	0.837369	1.31182	1.43343	1.34589	1.23665	1.00711	1.43041
1155.25	1.75994	0.598823	0.517972	0.570579	0.455252	0.460632	0.36629	0.39893	0.873627	0.416912	0.679106	0.879787	0.827014	0.824985	0.770077	0.970869	0.842098	0.711067	0.746354	0.843929	0.921782	0.925779	0.82577	0.851617	0.930004	0.533227	0.476711	0.73044	0.817754	0.718246	0.964401	0.90568	1.36151	1.08878	1.10888	0.458959	0.578963	0.490061	0.671641	0.913712	2.03783	2.20675	0.749406	1.32536	1.55329	1.05945	1.2926	1.13092	0.785098
1154.15	1.82368	0.68812	0.426802	0.60875	0.624041	0.294219	0.299596	0.23936	0.783753	0.288117	0.52417	0.7634	0.70939	0.718182	0.672664	0.814506	0.766	0.582604	0.6954	0.700707	0.758141	0.866293	0.740954	0.744574	0.784466	0.547186	0.481659	0.696574	0.746545	0.687514	0.981701	0.846496	1.33991	1.07344	1.0334	0.384849	0.574285	0.437498	0.621954	0.890828	2.14161	2.39974	1.1585	1.20163	1.39994	1.10955	1.28999	1.1587	0.910973
1153.05	1.78507	0.684099	0.36943	0.654031	0.742321	0.145802	0.21504	0.0694906	0.787576	0.329968	0.42453	0.690824	0.565933	0.692102	0.628911	0.68508	0.677557	0.493192	0.68954	0.645043	0.695666	0.749558	0.704876	0.637709	0.697275	0.533898	0.49277	0.671811	0.717763	0.68636	1.00815	0.85038	1.37485	1.11741	1.05158	0.354655	0.579635	0.42802	0.598504	0.849248	1.90735	2.42809	1.1265	1.09074	1.53235	0.7241	1.13337	1.06818	0.825498
1151.95	1.50899	0.719835	0.410302	0.371691	0.73137	0.207446	0.275672	0.21032	0.744092	0.363027	0.353838	0.596362	0.507205	0.593694	0.606701	0.546536	0.598694	0.438119	0.622408	0.58511	0.622684	0.58275	0.637736	0.609041	0.535782	0.537433	0.499167	0.704471	0.67919	0.712788	1.01373	0.848729	1.47869	1.06255	1.045	0.35617	0.591267	0.419806	0.600322	0.863845	1.84447	2.20466	1.0982	1.00041	1.43166	0.866394	0.894098	1.02324	1.22084
1150.85	1.17464	0.800515	0.572092	0.436483	0.738386	0.443897	0.407748	0.57	0.928304	0.636178	0.337263	0.562604	0.47567	0.551726	0.586244	0.506033	0.573322	0.429946	0.573291	0.606936	0.560885	0.52461	0.721053	0.6212	0.479174	0.560344	0.535006	0.703614	0.750008	0.73563	0.97636	0.885791	1.53514	1.0944	1.10607	0.388445	0.63086	0.428801	0.689894	0.906183	1.58865	2.21173	0.924576	1.21958	1.15975	0.795284	0.920659	0.77493	1.5351
1149.75	1.2002	0.828009	0.689344	0.656852	0.87565	0.614667	0.543461	0.586288	0.8557	0.792541	0.38884	0.505736	0.406661	0.518344	0.60173	0.557527	0.600316	0.386452	0.51976	0.630731	0.544582	0.447141	0.764447	0.622242	0.538144	0.608169	0.585167	0.730505	0.760749	0.784585	0.998427	0.971221	1.52075	1.15674	1.12514	0.479574	0.700859	0.463142	0.730505	0.940152	1.52295	2.05377	0.841445	1.00603	1.19791	0.95494	0.801066	0.559558	1.61194
1148.65	1.54389	0.93372	0.711725	0.82018	0.918124	0.714349	0.65985	0.672133	0.96011	0.81311	0.413363	0.47719	0.36323	0.492817	0.559946	0.578397	0.559392	0.421963	0.462346	0.622675	0.600982	0.425851	0.607179	0.630244	0.501611	0.622291	0.629755	0.746533	0.806748	0.837517	0.991251	1.12255	1.49707	1.09619	1.10445	0.554126	0.751789	0.488486	0.757806	1.05083	1.25376	1.8506	0.656869	0.797609	1.10351	0.802165	0.67901	0.301891	1.0142
1147.55	2.1799	0.894953	0.500455	0.878951	1.01847	0.908257	0.649673	0.912393	1.06443	0.83485	0.466166	0.500821	0.435404	0.534828	0.558177	0.555829	0.584343	0.462495	0.454858	0.665893	0.620061	0.384932	0.615303	0.566666	0.569295	0.66032	0.677475	0.829629	0.825144	0.936185	1.07173	1.15588	1.56707	1.15624	1.06259	0.601448	0.838445	0.545675	0.796014	1.14562	1.28182	1.68274	0.841594	0.825156	1.0603	0.889017	0.737851	0.496307	0.849171
1146.45	2.44345	0.786919	0.29873	0.799633	0.930015	0.782092	0.601318	0.684345	1.04517	0.618801	0.496202	0.538826	0.508315	0.610656	0.539791	0.590417	0.597188	0.479628	0.525204	0.725887	0.749684	0.422761	0.727769	0.491885	0.544119	0.699852	0.703408	0.909779	0.841522	0.988956	1.09955	1.14454	1.54373	1.21445	1.09184	0.690795	0.841553	0.61339	0.831147	1.24459	1.25705	1.62107	0.729702	0.801011	0.847934	0.915266	0.920556	0.366902	0.762827
1145.34	2.20801	0.968077	0.341328	0.645428	0.698139	0.867518	0.766043	0.829516	1.0977	0.770982	0.53969	0.566159	0.564073	0.576802	0.531273	0.704934	0.631119	0.57297	0.502262	0.665759	0.828258	0.457349	0.777393	0.44803	0.489112	0.704786	0.711754	0.909866	0.8491	0.988628	1.0908	1.08413	1.53155	1.17336	1.06529	0.69483	0.843216	0.64011	0.841407	1.28993	1.60265	1.52299	0.811029	0.765909	0.668442	1.07746	0.98366	0.343296	0.884679
1144.24	1.7391	0.947523	0.559785	0.647176	0.497687	0.92264	0.624923	0.903229	1.21772	0.775581	0.552173	0.612649	0.623695	0.545842	0.535472	0.794067	0.666038	0.639231	0.519433	0.64582	0.798219	0.476769	0.793995	0.475154	0.505655	0.680281	0.683729	0.878578	0.866538	0.93812	1.02937	0.996457	1.44977	1.15359	1.06123	0.654046	0.83915	0.59651	0.846232	1.23352	1.62695	1.3995	0.785585	0.847373	0.344832	0.90598	1.02104	0.411974	1.05395
1143.14	2.03833	1.0899	0.639403	0.684925	0.47879	0.987852	0.665074	0.815934	0.910287	0.905101	0.567152	0.62847	0.555797	0.472735	0.531707	0.79285	0.727246	0.595035	0.460763	0.625208	0.711208	0.479225	0.776444	0.452248	0.537331	0.65294	0.630779	0.848444	0.820713	0.847323	0.925713	0.945049	1.35373	1.16006	0.987235	0.625457	0.839635	0.57191	0.831749	1.12462	1.73447	1.19545	0.740084	0.693847	0.730843	0.812279	0.613384	0.422838	0.952776
1142.04	1.58642	1.28934	0.784091	0.545865	0.606403	0.991625	0.757897	0.86025	0.825288	0.892442	0.437473	0.615587	0.481357	0.45847	0.555311	0.726965	0.746263	0.562012	0.384692	0.673965	0.705527	0.440294	0.616115	0.522975	0.593016	0.632496	0.558918	0.804562	0.763825	0.708773	0.86415	0.952131	1.326	1.07078	0.94133	0.571932	0.799558	0.554451	0.800877	1.0688	1.53573	1.2856	0.362507	0.29101	0.844325	0.534738	0.587206	0.357681	0.581621
1140.94	1.512	1.04245	0.670361	0.363308	0.575998	0.934038	0.72819	0.841031	0.52576	0.833954	0.429996	0.578693	0.460135	0.420011	0.477192	0.650714	0.756825	0.542561	0.310412	0.745778	0.658009	0.393694	0.591177	0.542684	0.644706	0.582632	0.449248	0.748261	0.677209	0.623013	0.836663	0.910317	1.35078	1.02312	0.854091	0.487854	0.76468	0.524958	0.766734	1.00348	1.74258	1.22896	0.193203	0.134685	0.95014	0.451547	0.804508	0.83876	0.321364
1139.84	1.22859	0.902996	0.454059	0.269939	0.619605	0.700992	0.733013	0.668996	0.40918	0.732029	0.43543	0.527297	0.388296	0.365951	0.448128	0.606193	0.760792	0.467499	0.30409	0.765961	0.643447	0.436019	0.668476	0.548253	0.725454	0.555234	0.369194	0.65561	0.700928	0.560858	0.813048	0.819645	1.26891	0.965569	0.785034	0.474861	0.717856	0.472642	0.717639	0.989064	1.59237	1.16187	0.25126	0.267938	0.61161	0.895873	1.2351	0.704246	0.412948
1138.73	1.1939	1.1074	0.487424	0.425643	0.688066	0.635791	0.906638	1.09921	0.616549	0.827553	0.509283	0.493	0.381867	0.335138	0.493961	0.647864	0.805654	0.500224	0.297638	0.743255	0.698747	0.529945	0.855472	0.553901	0.773387	0.486776	0.326435	0.566567	0.757178	0.476323	0.800005	0.844316	1.23091	0.943859	0.819964	0.430029	0.708623	0.425145	0.713621	0.962363	1.74174	1.0641	0.239621	0.598248	0.435292	0.75758	1.53255	0.488962	0.771811
1137.63	1.07313	0.89424	0.767366	0.515169	0.649141	0.774632	0.797503	1.15229	1.06362	0.720725	0.501564	0.506185	0.403427	0.303091	0.461022	0.662588	0.809274	0.526133	0.325266	0.712049	0.624679	0.561817	0.877049	0.595305	0.740403	0.373306	0.269604	0.480173	0.775179	0.393647	0.733132	0.779832	1.24637	0.945655	0.819341	0.386018	0.694191	0.330069	0.646744	0.9181	1.81409	0.595691	0.328786	0.674649	0.272732	0.828142	1.31966	0.203455	0.984209
1136.53	1.50094	0.808723	0.723775	0.666071	0.553851	0.770578	0.65495	1.07203	1.14929	0.689589	0.473263	0.528122	0.368224	0.304718	0.423163	0.638934	0.783828	0.491499	0.291445	0.689289	0.619926	0.480388	0.868883	0.565354	0.673481	0.295269	0.184136	0.414779	0.716838	0.328653	0.638258	0.757762	1.30444	0.90993	0.819554	0.373781	0.652121	0.275773	0.568377	0.841543	1.67612	0.507497	0.46359	0.595804	0.541764	1.00077	1.12167	0.153653	0.699548
1135.42	1.32184	0.761363	0.633104	0.672978	0.677893	0.730358	0.565572	1.20654	1.18272	0.698696	0.392411	0.479174	0.369698	0.352081	0.417885	0.598577	0.780348	0.471371	0.244277	0.707387	0.631454	0.440411	0.856069	0.576875	0.735132	0.262277	0.156184	0.393944	0.66182	0.232746	0.596581	0.696493	1.30351	0.898252	0.788946	0.344801	0.563884	0.264187	0.486	0.73591	1.65533	0.776102	0.361415	0.569737	0.906649	1.10154	0.947873	0.165924	0.374976
1134.32	1.58129	0.52052	0.586306	0.574645	0.579337	0.750333	0.376016	1.21247	0.764129	0.598767	0.337651	0.390183	0.377119	0.280208	0.319389	0.493953	0.707314	0.443929	0.199779	0.659915	0.609158	0.34213	0.79804	0.523988	0.726741	0.226839	0.105254	0.336159	0.534031	0.156765	0.559061	0.606325	1.1842	0.783364	0.724223	0.278618	0.503367	0.227646	0.410452	0.61759	1.84843	0.844731	0.327344	0.348156	0.980678	1.10173	0.765314	0.410091	0.282354
1133.22	1.46941	0.60487	0.664187	0.636918	0.715002	0.801842	0.505667	1.33078	0.743174	0.641717	0.357812	0.324869	0.344836	0.234349	0.26576	0.382899	0.654865	0.320492	0.188187	0.587365	0.55908	0.26228	0.800096	0.466427	0.724211	0.161406	0.0780313	0.296938	0.486084	0.139447	0.559874	0.523156	0.910706	0.687871	0.612407	0.241534	0.472553	0.180777	0.342285	0.565443	1.74177	1.03964	0.729052	0.527087	0.747433	0.942538	0.524471	0.524826	0.212593
1132.11	1.83324	0.789265	0.714991	0.612046	0.891045	0.778233	0.613168	1.45917	0.727031	0.66527	0.450071	0.29688	0.354819	0.20494	0.312374	0.310637	0.658984	0.32795	0.202071	0.491922	0.552594	0.31598	0.895093	0.389629	0.65075	0.140158	0.0649537	0.30746	0.412416	0.0777693	0.600567	0.551939	0.756149	0.660062	0.58372	0.190465	0.456226	0.157722	0.3192	0.490417	1.72135	1.0984	0.679703	0.508644	0.791501	0.466884	0.373412	0.558588	0.286343
1131.01	1.93677	0.872743	0.982842	0.634846	1.00407	1.02055	0.880591	1.39289	1.02351	0.826651	0.453825	0.315997	0.362387	0.203953	0.318642	0.303291	0.67535	0.325115	0.27211	0.464702	0.511009	0.39178	1.0187	0.427673	0.584327	0.123951	0.06633	0.342967	0.374239	0.0929424	0.644671	0.566679	0.769397	0.701144	0.56746	0.190811	0.433655	0.134482	0.320463	0.479937	1.83747	1.09912	0.710496	0.597311	0.61633	0.628797	0.1661	0.391025	0.335576
1129.9	1.23694	0.865392	0.831563	0.774371	0.895247	0.966055	0.698219	1.33935	1.13488	0.86838	0.45728	0.425582	0.349909	0.297714	0.343344	0.37873	0.678419	0.30765	0.340694	0.496629	0.566523	0.423884	1.15199	0.39803	0.531181	0.151687	0.105991	0.380048	0.358923	0.149672	0.706434	0.608201	1.00024	0.644831	0.65362	0.192429	0.431917	0.14165	0.369973	0.539996	1.65348	1.09787	0.760858	0.747951	0.7451	0.602253	0.595886	0.524285	0.323872
1128.8	1.06457	0.774802	0.567429	0.737357	0.729858	0.802476	0.554601	1.33417	0.973806	0.935312	0.474688	0.463205	0.383803	0.337534	0.417263	0.511502	0.691074	0.33929	0.401229	0.513622	0.524785	0.498582	1.28613	0.386991	0.546253	0.205991	0.153044	0.427306	0.358174	0.182934	0.692247	0.6093	1.08104	0.727624	0.724392	0.221912	0.401837	0.159991	0.395314	0.529078	1.59229	1.30035	0.675509	0.777084	0.846087	0.712391	0.721788	0.701833	0.435988
1127.69	0.960498	0.845356	0.539444	0.566019	0.415373	0.779965	0.451138	1.2898	0.861296	0.902189	0.40038	0.420528	0.413137	0.318351	0.435665	0.551589	0.660639	0.36483	0.421304	0.570053	0.522474	0.484771	1.11553	0.32953	0.552689	0.22787	0.18991	0.400336	0.345044	0.167217	0.756963	0.575572	1.09322	0.711723	0.798734	0.227625	0.392086	0.221897	0.400268	0.521167	1.51852	1.0818	0.449921	0.636261	0.948349	0.711085	0.79331	0.73269	0.735252
1126.59	0.730032	0.861771	0.703545	0.432528	0.396494	0.751926	0.451635	1.18432	0.797923	0.756826	0.380875	0.384995	0.429207	0.381371	0.440829	0.61893	0.558596	0.348706	0.448465	0.587087	0.558015	0.460779	0.96987	0.363628	0.570255	0.212124	0.222212	0.387137	0.343703	0.160125	0.800572	0.583866	0.999781	0.76457	0.821601	0.22041	0.39825	0.297385	0.389459	0.512824	1.34865	1.28956	0.655302	0.772231	0.935889	0.565979	0.733673	0.630444	0.739162
1125.48	1.12519	0.901522	0.642818	0.361563	0.283284	0.661684	0.42323	0.931361	0.566026	0.685052	0.458197	0.378109	0.461832	0.452192	0.474281	0.715592	0.477627	0.421051	0.514192	0.559882	0.635853	0.54488	0.895231	0.397149	0.661689	0.253733	0.29215	0.465344	0.421472	0.157364	0.910943	0.679253	1.11901	0.867199	0.906641	0.230151	0.408332	0.359246	0.380365	0.499039	1.19562	1.07821	0.679804	0.609908	0.993703	0.398262	0.701398	0.510332	0.74981
1124.38	1.68242	0.98918	0.727228	0.496633	0.458268	0.800356	0.523112	0.789302	0.710202	0.698172	0.554586	0.383367	0.491242	0.543626	0.498057	0.727713	0.485964	0.501874	0.623505	0.576112	0.658548	0.682721	0.909264	0.453915	0.788427	0.273797	0.37538	0.561479	0.501113	0.244377	1.04513	0.735678	1.19497	0.942679	0.968073	0.276241	0.414494	0.410937	0.381943	0.475088	1.21102	1.42888	0.647511	0.698941	0.609011	0.536919	0.777935	0.27724	0.620255
1123.27	0.960769	0.793026	0.609958	0.53517	0.521909	0.837511	0.315774	0.763873	0.823681	0.574636	0.593809	0.453325	0.44447	0.590755	0.50184	0.71444	0.517086	0.525086	0.643959	0.646046	0.656391	0.720106	0.904653	0.37643	0.774323	0.313812	0.41347	0.583459	0.516699	0.317277	1.12484	0.775011	1.37198	0.876372	1.0082	0.27702	0.422621	0.374343	0.399229	0.51784	1.211	1.58051	0.627885	0.880939	0.525431	0.573204	1.05289	0.106084	0.519119
1122.16	1.4426	0.524293	0.373531	0.496834	0.431259	0.631342	0.247331	0.644739	0.531541	0.317092	0.548495	0.46929	0.380192	0.536053	0.495476	0.671951	0.503399	0.496062	0.607515	0.634624	0.535397	0.62304	0.954266	0.288302	0.664604	0.323637	0.358832	0.529606	0.47469	0.33589	1.03242	0.748096	1.32719	0.793955	0.960679	0.279081	0.386046	0.299178	0.374802	0.51998	1.28959	1.67193	0.512466	0.959634	0.475464	0.620731	0.999747	0.397131	0.459066
1121.06	1.42126	0.424291	0.470909	0.375649	0.298851	0.699057	0.343996	0.669376	0.555903	0.344651	0.448673	0.44713	0.383208	0.400046	0.462232	0.579986	0.473262	0.454184	0.520597	0.610635	0.441403	0.526152	0.830624	0.244094	0.591797	0.265517	0.33287	0.439619	0.408218	0.317813	0.900903	0.681654	1.19635	0.69151	0.85699	0.255821	0.327477	0.236053	0.342037	0.493661	1.20699	1.37707	0.614857	1.04992	0.717759	0.757273	0.89128	0.401484	0.486079
1119.95	1.00645	0.143741	0.533953	0.200963	0.318004	0.598581	0.268199	0.504184	0.620233	0.350822	0.397554	0.393746	0.3609	0.377267	0.484583	0.499067	0.439346	0.420089	0.480988	0.532378	0.408622	0.481836	0.773698	0.226837	0.535839	0.228857	0.302192	0.395578	0.37892	0.277219	0.692045	0.588707	1.0169	0.650551	0.728793	0.197308	0.288022	0.201154	0.348184	0.438556	1.18902	1.01091	0.739109	1.13696	0.642978	0.957124	0.914513	0.567898	0.380319
1118.84	1.1051	0.271558	0.373082	0.318016	0.275607	0.499695	0.374474	0.552443	0.695312	0.392238	0.383901	0.403516	0.430973	0.364772	0.479507	0.446642	0.406199	0.405266	0.51008	0.47813	0.422642	0.531167	0.749921	0.24461	0.524835	0.216829	0.296478	0.411329	0.375574	0.270561	0.60318	0.541106	0.866157	0.655546	0.690068	0.138445	0.246717	0.205993	0.376718	0.420923	1.09321	0.705108	0.823343	1.18811	0.657805	0.607488	0.977683	0.574788	0.681001
1117.74	1.34335	0.385955	0.396091	0.485079	0.478231	0.59681	0.381706	0.430584	0.826728	0.46111	0.393316	0.418962	0.486257	0.435797	0.483763	0.397796	0.409888	0.400884	0.526648	0.389172	0.434775	0.576971	0.763129	0.259786	0.55096	0.212606	0.347815	0.410166	0.402948	0.265149	0.565986	0.497706	0.666956	0.624037	0.629139	0.12075	0.255832	0.238146	0.379126	0.334854	0.922969	1.02889	1.1106	1.09791	0.639639	0.49721	0.950904	0.689303	0.738778
1116.63	0.665103	0.615075	0.256857	0.33867	0.399261	0.580323	0.417308	0.419313	0.829207	0.339596	0.387007	0.419661	0.44567	0.47887	0.448511	0.395413	0.369473	0.359673	0.468328	0.39916	0.386933	0.567843	0.728501	0.203539	0.542533	0.210333	0.353982	0.377984	0.406789	0.292279	0.586316	0.499133	0.676072	0.547978	0.618768	0.0869818	0.233379	0.230698	0.351531	0.314312	0.810819	1.35499	1.19991	0.96564	0.652684	0.780861	0.865939	0.523572	0.812298
1115.52	0.788572	0.597007	0.201325	0.42395	0.336015	0.47608	0.328022	0.530935	0.415339	0.304834	0.399086	0.406558	0.413533	0.538024	0.437563	0.440348	0.363938	0.386268	0.419941	0.447186	0.417103	0.527297	0.722004	0.27927	0.537406	0.230777	0.359144	0.349238	0.40028	0.31955	0.577944	0.481058	0.741843	0.50537	0.610847	0.12652	0.266019	0.24251	0.358799	0.30031	1.01009	1.65007	1.13927	0.718487	0.971516	0.984834	0.70245	0.720393	1.02977
1114.41	1.17766	0.695285	0.397696	0.452358	0.258663	0.659451	0.290558	0.690752	0.330178	0.469437	0.404089	0.436085	0.386406	0.501237	0.421524	0.499908	0.36491	0.383298	0.40188	0.578954	0.393392	0.377623	0.721599	0.396674	0.537539	0.249141	0.369298	0.367281	0.36543	0.318697	0.526051	0.485256	0.766717	0.497163	0.55001	0.180365	0.302568	0.267976	0.332965	0.342264	0.787554	1.66988	1.26203	0.728055	0.998474	1.40162	0.626708	0.652013	1.03587
1113.3	1.1128	0.631352	0.628243	0.567581	0.256667	0.709128	0.270101	0.726705	0.576368	0.644599	0.464369	0.464073	0.346859	0.510642	0.410606	0.501517	0.41689	0.384369	0.375218	0.627936	0.397901	0.315743	0.678164	0.425822	0.535734	0.271154	0.387269	0.38288	0.371115	0.339576	0.403984	0.448581	0.831791	0.470275	0.499735	0.217681	0.32828	0.299415	0.346017	0.341999	0.899052	1.65212	1.02682	0.634739	0.998473	1.76997	1.1137	0.672858	0.811118
1112.19	1.13296	0.944026	0.702438	0.778344	0.427013	0.787538	0.502653	0.965497	0.839131	0.854323	0.417902	0.508992	0.412344	0.468828	0.389392	0.488794	0.411523	0.366334	0.408357	0.622616	0.388643	0.249303	0.598828	0.475164	0.50228	0.293974	0.378641	0.391328	0.377829	0.394381	0.386217	0.428038	0.767114	0.455299	0.44383	0.227714	0.314078	0.332093	0.34391	0.391207	0.815704	1.54245	0.922122	0.428089	1.17308	1.32552	1.36114	0.701332	0.919632
1111.09	1.29883	0.94185	0.894727	0.75989	0.815181	0.884474	0.625125	0.854395	1.16319	0.951743	0.405888	0.554269	0.432902	0.488088	0.406646	0.498027	0.386888	0.378651	0.409984	0.457546	0.398374	0.174527	0.636808	0.418395	0.45294	0.300193	0.442995	0.370379	0.392909	0.417367	0.381343	0.414749	0.642208	0.393331	0.413798	0.218982	0.294942	0.377107	0.357006	0.368756	0.716739	1.07433	1.14706	0.639003	1.29629	1.27228	1.63267	0.895447	0.864175
1109.98	1.2173	0.847201	0.786438	0.498022	0.74897	0.790749	0.710926	0.771468	1.14263	0.817759	0.413138	0.563481	0.456853	0.492085	0.387869	0.450238	0.353335	0.349329	0.44302	0.329863	0.317534	0.218536	0.592041	0.303021	0.461226	0.284889	0.473893	0.306587	0.427892	0.448669	0.386032	0.376392	0.626887	0.319046	0.389896	0.223804	0.227554	0.372647	0.355164	0.353697	0.76113	1.00916	1.18174	0.76247	1.15999	1.2931	1.53437	0.791933	0.736118
1108.87	0.717196	0.489301	0.740459	0.431069	0.732134	0.805474	0.685941	0.771151	0.915242	0.817936	0.448824	0.53606	0.487579	0.486495	0.322255	0.416855	0.325076	0.393849	0.465498	0.304561	0.317989	0.315367	0.571436	0.306795	0.426676	0.276362	0.491926	0.265081	0.405276	0.459209	0.33891	0.336389	0.622143	0.326376	0.338858	0.229604	0.194654	0.369138	0.370287	0.330163	0.858056	0.837666	1.19309	0.727916	1.1057	1.16473	1.03961	0.837979	0.712783
1107.76	0.898095	0.255413	0.61219	0.207354	0.575438	0.84706	0.56016	0.707707	0.764963	0.62036	0.475301	0.551242	0.459185	0.487014	0.297629	0.393808	0.260856	0.346481	0.438672	0.351155	0.304962	0.265435	0.550601	0.306756	0.418728	0.24529	0.454816	0.212913	0.346304	0.403757	0.30864	0.273206	0.523715	0.302823	0.249184	0.221332	0.195678	0.358522	0.322146	0.351937	0.627148	0.707511	1.04415	0.770075	0.957406	1.30344	0.691423	1.0402	0.239547
1106.65	1.09041	0.211905	0.406966	0.243725	0.204245	0.758095	0.390419	0.500282	0.580015	0.217095	0.48455	0.593042	0.483679	0.453359	0.281729	0.305923	0.222812	0.2818	0.372063	0.348692	0.237911	0.33178	0.57987	0.323191	0.417891	0.219061	0.45777	0.168356	0.293695	0.397397	0.188516	0.222772	0.424512	0.282225	0.205828	0.252802	0.200631	0.34145	0.326559	0.341627	0.634382	0.963523	0.565118	0.836794	0.794826	1.37651	0.516643	0.874701	0.212279
1105.54	0.547966	0.464652	0.276586	0.365151	0.133488	0.711039	0.234327	0.428014	0.469281	0.193923	0.452627	0.623761	0.471373	0.426811	0.300594	0.282237	0.207718	0.230436	0.380755	0.329698	0.208967	0.288562	0.557885	0.348268	0.441712	0.182086	0.474939	0.152528	0.27397	0.473789	0.190298	0.237513	0.297448	0.300627	0.201143	0.27189	0.197981	0.326957	0.324818	0.373966	0.424815	0.92865	0.625901	0.677052	0.821433	0.865836	0.586125	0.731287	0.39923
1104.43	0.621728	0.506654	0.298078	0.265876	0.214022	0.577759	0.17738	0.306266	0.420011	0.110434	0.414237	0.620857	0.460953	0.488118	0.302426	0.308654	0.202773	0.203966	0.372714	0.214926	0.229382	0.192437	0.496362	0.287961	0.373602	0.18634	0.50344	0.161293	0.195885	0.503137	0.174524	0.20755	0.207864	0.296167	0.220806	0.233214	0.184207	0.363615	0.349246	0.3582	0.34141	0.703902	0.620836	0.807049	0.935709	0.671579	1.00728	0.541384	0.546886
1103.32	0.714917	0.464249	0.266765	0.329682	0.123318	0.414817	0.0867871	0.345044	0.390754	0.153623	0.344331	0.599902	0.430169	0.4892	0.3407	0.233182	0.229196	0.150475	0.376432	0.179052	0.229232	0.102478	0.437513	0.244602	0.280965	0.214591	0.509669	0.176911	0.173772	0.525779	0.174119	0.179833	0.195758	0.223852	0.194944	0.257759	0.143413	0.369687	0.373257	0.393966	0.341105	1.16972	0.745288	0.851046	0.813655	0.202323	1.13527	0.432384	0.452417
1102.21	0.552689	0.324524	0.185866	0.343065	0.138495	0.356876	0.292313	0.453259	0.393326	0.357724	0.312159	0.540161	0.359553	0.46766	0.226234	0.173572	0.2103	0.123672	0.353226	0.186807	0.193388	0.07696	0.300403	0.215653	0.174842	0.208421	0.471856	0.189358	0.137913	0.503594	0.126752	0.145769	0.126583	0.12128	0.169381	0.220042	0.119227	0.351253	0.36694	0.386509	0.397153	1.22259	0.653375	0.60893	0.847092	0.211556	0.665351	0.374437	0.396242
1101.09	0.728608	0.270644	0.139679	0.203752	0.117379	0.332811	0.345409	0.503676	0.352838	0.451713	0.238991	0.526864	0.281581	0.468507	0.217169	0.160306	0.199789	0.109336	0.265768	0.151381	0.241123	0.0705036	0.115864	0.21293	0.0706742	0.198786	0.394628	0.165201	0.114087	0.412505	0.106433	0.0396293	0.0681594	0.015602	0.147329	0.181093	0.121997	0.305273	0.325108	0.346944	0.370458	1.21979	0.580483	0.165329	0.900147	0.293906	0.712957	0.463743	0.120724
1099.98	1.17641	0.475635	0.249485	0.365001	0.0571552	0.298515	0.491902	0.491272	0.358118	0.309878	0.20347	0.528423	0.225987	0.443889	0.189567	0.0994732	0.0785574	0.0979816	0.177964	0.11782	0.140439	0.183895	0.0777369	0.248218	0.0443395	0.194405	0.313282	0.199302	0.0919412	0.36706	0.0525901	0.00659618	0.0324017	0.0304288	0.117859	0.202235	0.13711	0.228592	0.307142	0.320556	0.307882	0.916393	0.642128	0.337286	0.74883	0.421071	0.419006	0.441814	0.541638
1098.87	1.20642	0.62433	0.297383	0.578989	0.210941	0.380906	0.409305	0.46119	0.372198	0.335986	0.22944	0.536578	0.167496	0.383965	0.168298	0.148436	0.0442457	0.109382	0.175454	0.0619171	0.128571	0.169908	0.117422	0.250898	0.148023	0.152529	0.281921	0.178811	0.0727557	0.346462	0.0827619	0.0398885	0.079588	0.0839197	0.103743	0.18747	0.141969	0.177132	0.237491	0.27901	0.158029	0.359822	0.938308	0.319183	0.770993	0.326716	0.53641	0.463022	0.899464
1097.76	1.12881	0.477173	0.279115	0.50743	0.387156	0.412776	0.420155	0.411901	0.361079	0.168601	0.258946	0.522766	0.198	0.393406	0.105743	0.234633	0.0332489	0.0999442	0.143618	0.0275973	0.117756	0.162521	0.220879	0.251348	0.274217	0.135154	0.264481	0.184142	0.0634793	0.307173	0.037455	0.067456	0.100711	0.197244	0.0382845	0.134728	0.143332	0.170186	0.179947	0.237697	0.224069	0.0765369	1.13108	0.47941	0.924473	0.521845	0.276702	0.617913	0.728434
1096.65	0.692448	0.546514	0.436969	0.574542	0.360061	0.44926	0.441286	0.455927	0.681734	0.253244	0.252499	0.527182	0.240211	0.395114	0.119875	0.280363	0.0634297	0.099151	0.164741	0.10756	0.147155	0.114276	0.38098	0.263416	0.378587	0.127925	0.263081	0.198323	0.130088	0.308526	0.024575	0.123707	0.168789	0.212492	0.0637518	0.14441	0.118927	0.17889	0.163651	0.269914	0.342079	0.422754	1.18205	0.741181	0.598959	0.481566	0.329893	0.836976	0.382563
1095.54	0.85238	0.697886	0.313188	0.49256	0.218293	0.410791	0.559198	0.700602	0.788912	0.346805	0.226289	0.50086	0.181404	0.35015	0.0631705	0.216873	0.116009	0.0866062	0.178338	0.146618	0.122405	0.0800017	0.335046	0.186138	0.337398	0.0442622	0.220079	0.130498	0.126587	0.289135	0.0105886	0.115625	0.100477	0.172741	0.0852237	0.0937797	0.0806897	0.174853	0.163967	0.271345	0.602917	0.519911	0.888111	0.771219	0.512956	0.914302	0.273943	1.00466	0.206727
1094.42	1.2715	0.90742	0.363987	0.349036	0.0752497	0.408725	0.565249	0.743184	0.806917	0.47508	0.114759	0.45281	0.0908781	0.328852	0.0559693	0.177793	0.0958445	0.0655037	0.146548	0.175037	0.131626	0.0757139	0.186269	0.18151	0.259997	0.0324705	0.201608	0.0778407	0.15207	0.223702	0.00113201	0.118203	0.0616608	0.144659	0.13085	0.0701367	0.0720139	0.156859	0.166903	0.282084	0.818671	0.639916	0.69851	0.894833	0.339327	0.878802	0.403874	0.875699	0.304898
1093.31	1.37242	1.0465	0.57812	0.301329	0.108815	0.436769	0.497478	0.818787	0.786939	0.501079	0.0619931	0.350047	0.0570292	0.313293	0.0503845	0.142193	0.072813	0.0842816	0.102736	0.243955	0.121172	0.130037	0.0491131	0.134394	0.20299	0.0120907	0.149172	0.06114	0.164628	0.229837	0.0451532	0.17648	0.160654	0.202483	0.173843	0.0626248	0.061222	0.144149	0.146873	0.305802	0.80911	0.664304	0.929556	0.926668	0.233383	0.938121	0.622932	0.88431	0.721763
1092.2	1.52027	0.843279	0.572263	0.392682	0.249799	0.455145	0.318012	0.761269	0.672187	0.452877	0.0337043	0.223348	0.0550769	0.26577	0.0580338	0.160793	0.0241557	0.058654	0.0954239	0.275354	0.190705	0.0782567	0.034123	0.150326	0.224451	0.0209651	0.164325	0.033068	0.182553	0.205862	0.126698	0.25065	0.346288	0.204441	0.238728	0.0690105	0.0846192	0.139883	0.151322	0.29425	0.649147	0.525362	0.975494	0.645227	0.307304	0.781341	0.508916	0.905657	1.35326
1091.08	1.44936	0.47233	0.564077	0.35182	0.563349	0.549245	0.324714	0.766997	0.606819	0.461908	0.0888992	0.14986	0.112982	0.208357	0.0496614	0.236373	0.0230498	0.0495432	0.0583626	0.265544	0.234958	0.0892525	0.134816	0.143447	0.309476	0.0367911	0.134568	0.0349617	0.221678	0.188561	0.151614	0.293096	0.352812	0.263054	0.225844	0.0610455	0.108244	0.141498	0.132651	0.260374	0.650441	0.931013	1.20895	0.620743	0.450022	0.699743	0.244831	0.757792	1.36014
1089.97	1.16487	0.204464	0.727205	0.430775	0.68716	0.594846	0.423335	0.71143	0.531074	0.585252	0.0936972	0.0970232	0.162298	0.156448	0.0338245	0.24643	0.0911503	0.0633118	0.0778201	0.20466	0.240667	0.142227	0.199363	0.138498	0.340872	0.0397572	0.105065	0.0194625	0.189686	0.174141	0.129402	0.264839	0.289692	0.235773	0.243714	0.0661474	0.0976891	0.138596	0.108475	0.210367	0.574377	1.22255	1.02675	0.523281	0.444207	0.560805	0.438999	0.632237	1.20672
1088.86	0.850885	0.132474	0.548329	0.393675	0.544821	0.502584	0.444754	0.676283	0.187536	0.413211	0.130169	0.0517869	0.137689	0.0237265	0.0210985	0.161474	0.141666	0.0591189	0.0695974	0.110201	0.204549	0.103496	0.130934	0.0551954	0.285167	0.0251393	0.0471283	0	0.149114	0.105277	0.0549519	0.182073	0.120215	0.199465	0.201184	0.0487013	0.0480004	0.0905606	0.114324	0.146465	0.34802	1.15912	0.863528	0.626269	0.644241	0.649176	0.473675	0.603291	0.774892
1087.74	1.0599	0.171886	0.502297	0.312451	0.348506	0.492187	0.360404	0.526109	0.0506443	0.44006	0.209542	0.0877254	0.0828221	0.0470877	0.0600707	0.163144	0.145835	0.105237	0.052428	0.113891	0.205481	0.175161	0.176293	0.162118	0.331982	0.0461169	0.0646508	0.0270341	0.170249	0.0707082	0.0328031	0.164214	0.0296174	0.203889	0.187125	0.046897	0.0681355	0.0649832	0.109231	0.144961	0.364022	1.05984	0.598752	0.754189	0.558474	0.408096	0.659396	0.738037	0.809417
1086.63	0.875388	0.317151	0.365974	0.0937011	0.103414	0.372262	0.169493	0.495399	0	0.323186	0.195903	0.0808407	0.106255	0.0605959	0.124423	0.0555791	0.181007	0.140651	0.043409	0.112285	0.182803	0.271643	0.157381	0.149471	0.368795	0.0290462	0.0365046	0.0478954	0.179471	0.0651744	0.0804807	0.111353	0.0148146	0.131879	0.14911	0.0203581	0.0512138	0.0640552	0.0630525	0.138889	0.337822	1.11233	0.536673	0.571959	0.3318	0.488707	0.746537	1.01948	0.651972
1085.51	0.463036	0.46579	0.315647	0.212079	0.103737	0.392937	0.119192	0.591939	0.0516291	0.307068	0.171461	0.0781346	0.112961	0.109389	0.166799	0.0678344	0.119516	0.145736	0.0384321	0.141979	0.215631	0.246058	0.148383	0.145577	0.332016	0.0554128	0.0905164	0.0848109	0.213058	0.0441813	0.113965	0.0814047	0.0821261	0.097196	0.133668	0.0181362	0.0807937	0.0413985	0.0759442	0.14311	0.312218	0.762895	0.280625	0.459424	0.458114	0.367347	0.63168	1.12542	0.707253
1084.4	0.139534	0.621175	0.399471	0.285263	0.0916208	0.584303	0.142225	0.629116	0.356468	0.561757	0.142544	0.103203	0.0844488	0.167191	0.172694	0.192711	0.0597107	0.165753	0.0273312	0.162199	0.246635	0.254704	0.230978	0.0810216	0.35891	0.0913783	0.0503351	0.131542	0.234946	0.110799	0.139782	0.0671515	0.105325	0.141953	0.142833	0.0220434	0.0628096	0.0507556	0.067922	0.183298	0.422824	1.02861	0.657199	0.361883	0.511123	0.285731	0.853869	0.95807	0.906697
1083.28	0.359493	0.504759	0.317902	0.41101	0.135623	0.666834	0.168885	0.52109	0.39513	0.529903	0.155681	0.103234	0.104014	0.200011	0.167212	0.196117	0.0520796	0.206791	0.058781	0.137881	0.231129	0.313766	0.286912	0.0532283	0.327357	0.125139	0.0707783	0.126329	0.154911	0.142124	0.153341	0.0302294	0.198251	0.185333	0.186075	0.031782	0.0436017	0.0495738	0.0436606	0.176397	0.544926	1.09004	0.763215	0.288184	0.706924	0.314376	0.994736	0.867023	0.847883
1082.17	0.422394	0.415174	0.322082	0.457449	0.191918	0.729701	0.425296	0.551461	0.418807	0.563663	0.143945	0.0544693	0.129549	0.178668	0.138857	0.213708	0.0855805	0.14306	0.0753286	0.127165	0.166763	0.221428	0.15769	0	0.280532	0.111797	0.0578641	0.132724	0.0936537	0.0983544	0.0851627	0.0248234	0.171789	0.161688	0.165418	0.0410504	0.00639353	0.0243301	0.0393356	0.128504	0.485929	1.11337	0.957936	0.466805	1.02603	0.704386	0.871891	0.615354	0.668645
1081.05	1.32235	0.348612	0.395679	0.414668	0.315893	0.673577	0.562604	0.640335	0.487411	0.552379	0.183422	0.0794588	0.0993039	0.175276	0.0956029	0.193158	0.191262	0.128954	0.0893142	0.183752	0.108105	0.210023	0.161229	0.107893	0.180971	0.099467	0.0721484	0.153276	0.0628585	0.10288	0.0876468	0.0476813	0.19098	0.147893	0.156893	0.0315882	0.00120585	0.0437372	0.0433216	0.112481	0.466502	1.21165	0.977646	0.350523	0.792885	0.637356	0.958615	0.714515	0.614237
1079.94	1.57632	0.411056	0.351702	0.306341	0.339365	0.295113	0.565219	0.726088	0.513279	0.43416	0.162663	0.0293172	0.0911594	0.0800421	0.0779495	0.0546216	0.142655	0.0229966	0.0790146	0.135603	0.0437902	0.101685	0.0700576	0.0888458	0.100889	0.0509546	0.0412449	0.133057	0	0.0386278	0.0720213	0.0424633	0.175422	0.0312802	0.0687376	0.0105384	0	0.0126299	0.0154935	0.0575804	0.126953	1.20316	0.965353	0.152991	0.501082	0.861869	0.503449	0.814999	0.382596
1078.82	1.40478	0.476177	0.249002	0.31498	0.522178	0.112052	0.509932	0.64855	0.476568	0.267762	0.143631	0.0288228	0.0564936	0.0234922	0.0299379	0.0489189	0.1061	0	0.068233	0.085419	0	0.0466165	0.0670407	0.0423526	0	0.0351018	0.0477277	0.0967315	0.0508344	0	0.0317268	0.0439255	0.174205	0	0	0	0.0107503	0	0	0	0	0.811288	0.912715	0.236149	0.578741	0.788615	0.339619	1.1412	0.072755
1077.7	0.517223	0.365536	0.317671	0.280298	0.542658	0.0211706	0.286683	0.294011	0.248057	0.31566	0.10388	0.0679446	0	0.0352013	0.0112276	0.105268	0.0811987	0.000922772	0.0797963	0.1433	0.0704386	0.0659818	0.163785	0.00567079	0.13911	0.0497051	0.034123	0.125653	0.134628	0.070986	0.0507054	0.0715898	0.286816	0.101817	0.0831883	0.0307372	0.0338822	0.00748752	0.0382225	0.00678853	0.119037	1.02273	1.32414	0.301718	0.644861	0.595736	0.125482	1.26108	0.440629
1076.59	0.458691	0.356551	0.158288	0.277601	0.502721	0.085212	0.247561	0.0367029	0.129152	0.105968	0.11856	0.123008	0.0845967	0.0956976	0.0904363	0.228799	0.0355221	0.0929411	0.0939788	0.163558	0.136185	0.148932	0.275339	0.0874438	0.204141	0.0750518	0.0763538	0.120981	0.191608	0.0964245	0.0998513	0.0817502	0.490334	0.213897	0.189297	0.0714549	0.0936738	0.0498525	0.0694537	0.0280002	0.323002	1.1692	1.38805	0.501425	0.888985	0.753978	0.227691	1.46054	0.517398
1075.47	0.863382	0.662053	0.415751	0.369421	0.615807	0.43734	0.516387	0.187692	0.399239	0.372286	0.0848812	0.102557	0.165118	0.128781	0.0839931	0.321423	0.0574741	0.129805	0.105307	0.146949	0.156816	0.117865	0.130963	0.118162	0.235556	0.0254184	0.0873175	0.153096	0.205184	0.0761218	0.155219	0.128134	0.505644	0.287429	0.242046	0.103827	0.128813	0.0837447	0.083157	0.0425491	0.364839	1.10963	1.29151	0.614269	1.16785	0.913499	0.525834	1.05491	0.491102
1074.35	1.52846	0.835182	0.771185	0.204573	0.514274	0.611946	0.846568	0.425364	0.703581	0.658922	0	0.104014	0.126104	0.131374	0.054486	0.369349	0.145134	0.202224	0.121151	0.136353	0.202974	0.108979	0.130219	0.131155	0.234937	0.0773421	0.0872052	0.191985	0.202734	0.100711	0.233214	0.144288	0.490436	0.287585	0.28494	0.127948	0.144489	0.1375	0.104571	0.0989362	0.427893	1.13198	1.21433	0.657496	1.166	0.968646	0.98392	0.585802	0.620442
1073.24	1.64943	1.1606	0.778707	0.265375	0.435881	0.598422	0.816886	0.568483	0.7182	0.833026	0.0050632	0.0515388	0.0785369	0.105045	0.0300395	0.32926	0.116003	0.208794	0.0906123	0.0708757	0.193013	0.0434331	0.125571	0.0426492	0.139852	0.0863082	0.0951465	0.206259	0.105728	0.0809414	0.204544	0.118155	0.368637	0.203011	0.262772	0.129678	0.147101	0.155527	0.126688	0.127454	0.255238	1.1477	0.81977	0.450468	0.875303	1.15117	0.825981	0.302132	0.738688
1072.12	1.42579	0.988763	0.734331	0.364677	0.258014	0.608406	0.8335	0.586118	0.629307	0.662265	0.057189	0.056809	0.0684708	0.144587	0.0182625	0.280634	0.1052	0.278821	0.0745418	0	0.148423	0.0483663	0.193342	0.0347672	0.0749416	0.116631	0.107479	0.267022	0.0978921	0.117268	0.192156	0.105728	0.344659	0.141003	0.284012	0.118498	0.0953489	0.177472	0.147939	0.140341	0.336132	0.7903	0.416181	0.44833	0.648606	0.96744	0.7882	0.418447	0.738328
1071	0.902827	0.573889	0.714998	0.429313	0.224559	0.514583	0.614083	0.524157	0.269765	0.429669	0.150797	0.086009	0.0634943	0.158762	0.0880591	0.25634	0.173625	0.291752	0.0764407	0.0552647	0.272034	0.16807	0.301275	0.0588342	0.162837	0.15342	0.144497	0.346442	0.128262	0.187413	0.170043	0.117014	0.385063	0.102293	0.34519	0.142537	0.075112	0.189646	0.222758	0.182703	0.306085	1.00539	0.52696	0.456743	0.746672	0.748602	0.517671	0.308646	1.04411
1069.88	0.432484	0.308055	0.545412	0.565943	0.289768	0.531344	0.404736	0.54951	0.14682	0.180278	0.184764	0.0530806	0.174037	0.218444	0.171928	0.337641	0.200392	0.259463	0.0860711	0.122398	0.339359	0.28355	0.230686	0.11494	0.121446	0.140772	0.197849	0.33121	0.184438	0.188669	0.159341	0.0901205	0.370568	0.10297	0.327316	0.151847	0.0533413	0.207197	0.237713	0.201725	0.371637	0.804217	0.485027	0.723547	0.740376	0.712758	0.485142	0.580586	0.839235
1068.76	0.409593	0.268038	0.376685	0.485753	0.525162	0.520036	0.279376	0.482492	0.397964	0.0629096	0.0922228	0.0276214	0.230229	0.207153	0.135841	0.332284	0.229864	0.222375	0.0921576	0.210644	0.371518	0.252269	0.0744505	0.130123	0.0688688	0.116068	0.222078	0.34601	0.215931	0.197618	0.177582	0.112378	0.346046	0.0750955	0.293444	0.161393	0.0347826	0.186191	0.224222	0.196604	0.212277	0.617706	0.691404	0.827872	0.65099	0.562142	0.5186	0.852093	0.277721
1067.64	1.05567	0.323005	0.350964	0.260877	0.377544	0.489303	0.444129	0.220503	0.555255	0.143572	0.0426076	0.0877089	0.210853	0.18135	0.128781	0.388393	0.267693	0.231941	0.122112	0.292423	0.414513	0.252131	0.086036	0.137483	0.184677	0.175689	0.252203	0.336166	0.229714	0.191926	0.205979	0.116721	0.34893	0.0554593	0.282042	0.205922	0.0895643	0.200183	0.20003	0.194874	0.20887	0.844814	1.18159	1.13043	0.62292	0.567519	0.756954	0.9293	0.2237
1066.53	1.44311	0.595285	0.24063	0.279216	0.303136	0.330414	0.341998	0.208075	0.59657	0.32901	0.101222	0.107378	0.160016	0.117249	0.065826	0.313128	0.220654	0.193519	0.103927	0.303365	0.256159	0.266718	0.120247	0.0563614	0.144948	0.188269	0.258166	0.29844	0.186703	0.116756	0.203187	0.0654915	0.352919	0.0690631	0.236209	0.221588	0.123275	0.210319	0.212586	0.126223	0.273274	0.955385	1.1631	1.12345	0.538755	0.479663	0.677045	0.796596	0.155685
1065.41	1.43129	0.661314	0.378414	0.447226	0.237366	0.315013	0.433747	0.384039	0.776998	0.454514	0.16789	0.104512	0.123318	0.124842	0.0634066	0.263071	0.118392	0.189985	0.0537276	0.312503	0.225151	0.220149	0.228262	0.123795	0.135764	0.217738	0.258851	0.306243	0.141291	0.135109	0.21589	0.0955851	0.497184	0.125839	0.220628	0.200232	0.141206	0.206822	0.233898	0.162796	0.492354	0.829322	1.07487	0.790429	0.637461	0.393434	0.795147	0.637575	0.292727
1064.29	1.56483	0.728878	0.457487	0.46543	0.177608	0.313908	0.564833	0.477437	0.818963	0.678499	0.319987	0.0672646	0.0865238	0.121899	0.0842157	0.242743	0.0565141	0.222282	0.0493907	0.320272	0.228597	0.195693	0.226456	0.126712	0.176311	0.239043	0.267985	0.276532	0.156176	0.185457	0.259266	0.151782	0.478556	0.178419	0.225915	0.221641	0.169781	0.207835	0.232354	0.209904	0.308573	1.05299	1.12702	0.45254	0.945697	0.39405	0.753637	0.533346	0.543066
1063.17	1.11306	0.551778	0.436509	0.434795	0.23297	0.444602	0.477619	0.571058	0.627135	0.753064	0.352976	0.0104263	0.167973	0.118185	0.0495817	0.283135	0.0737162	0.163594	0.0250998	0.293665	0.250801	0.245229	0.159741	0.0631335	0.13724	0.23779	0.295419	0.295985	0.225241	0.207462	0.296386	0.152467	0.306589	0.212894	0.164119	0.216396	0.170462	0.190253	0.218604	0.234246	0.181294	0.74871	0.914599	0.436679	0.986011	0.183845	0.619756	0.430691	0.539924
1062.05	0.753009	0.358968	0.132335	0.166049	0.209665	0.524825	0.214867	0.474114	0.460578	0.585015	0.225641	0.0273049	0.168307	0.0958961	0.0330569	0.359222	0.110775	0.187412	0.0376536	0.323568	0.302735	0.275971	0.0872713	0.0637932	0.103394	0.269019	0.284013	0.353807	0.317268	0.300045	0.318816	0.182016	0.341346	0.160552	0.19651	0.223889	0.170668	0.176645	0.187055	0.273493	0.0435243	0.716876	0.859678	0.249532	0.652381	0.264042	0.203324	0.392431	0.188037
1060.93	1.15213	0.314859	0.133812	0.12512	0.122802	0.490071	0.284925	0.227194	0.165762	0.355924	0.245816	0.0872665	0.203426	0.0852862	0.101276	0.458214	0.148578	0.253788	0.0372212	0.375549	0.310286	0.318394	0.0949111	0.0786281	0.158363	0.333178	0.343917	0.406891	0.376244	0.348468	0.339501	0.227466	0.40967	0.17068	0.29532	0.246488	0.211763	0.206626	0.180451	0.288164	0.0647534	0.814184	0.760844	0.47856	0.308116	0.244439	0	0.033849	0.328877
1059.81	1.29973	0.387405	0.204492	0.263837	0.0380372	0.395118	0.3136	0.336217	0.205427	0.382898	0.272641	0.160533	0.237985	0.0597585	0.18735	0.494093	0.2104	0.263724	0.0398199	0.414163	0.261207	0.350381	0.125156	0.0917009	0.241505	0.385919	0.376396	0.421519	0.429977	0.280375	0.355404	0.235306	0.511226	0.154087	0.383936	0.271302	0.21724	0.24348	0.2213	0.334458	0.283144	0.834765	0.593058	0.599244	0.337763	0.228193	0.174406	0.0169992	0.450734
1058.69	1.28026	0.409928	0.22847	0.384087	0.158685	0.349929	0.339537	0.460862	0.125033	0.387937	0.2632	0.163568	0.236486	0.0980331	0.196562	0.506914	0.186473	0.298032	0.033044	0.492342	0.289068	0.272424	0.221572	0.184544	0.311997	0.433946	0.415101	0.405012	0.397536	0.261731	0.397703	0.264186	0.589582	0.241725	0.405728	0.279129	0.218401	0.263509	0.252326	0.392539	0.496295	0.794006	0.138061	0.596077	0.471074	0.324052	0.326093	0.0292109	0.737162
1057.57	1.31353	0.356557	0.280874	0.365373	0.0969139	0.324165	0.589736	0.482837	0.199586	0.441388	0.357948	0.143444	0.240925	0.125342	0.173983	0.49026	0.14613	0.294852	0.0902759	0.511405	0.235058	0.134512	0.178519	0.259824	0.343272	0.433951	0.440028	0.362648	0.447314	0.283997	0.438477	0.247419	0.532673	0.28675	0.450438	0.292683	0.218832	0.285075	0.295811	0.421208	0.503027	0.791767	0.0751553	0.621665	0.452563	0.56283	0.540191	0.594633	0.805865
1056.44	0.745258	0.249737	0.221545	0.213224	0.131204	0.274043	0.505758	0.59074	0.203299	0.399571	0.276614	0.13958	0.239469	0.123757	0.112504	0.409163	0.160345	0.273995	0.0628362	0.436775	0.275831	0.0906588	0.135057	0.242045	0.263959	0.409822	0.432618	0.414657	0.397132	0.281908	0.38186	0.222032	0.33642	0.292582	0.368787	0.282461	0.233245	0.283426	0.306338	0.413094	0.347262	0.791602	0.0023323	0.639607	0.505636	0.415988	0.571262	0.697833	0.6422
1055.32	0.802969	0.253117	0.23527	0.0074328	0.135967	0.352279	0.196673	0.55467	0.457512	0.287272	0.239939	0.141383	0.243686	0.143888	0.123742	0.426939	0.180987	0.277409	0.126954	0.433251	0.376224	0.094491	0.10941	0.251717	0.283182	0.391515	0.403616	0.481431	0.429929	0.347449	0.307956	0.210727	0.329439	0.286972	0.379361	0.302973	0.257825	0.304515	0.296691	0.430992	0.31391	0.455141	0.210162	0.253166	0.374759	0.500389	0.520595	0.633927	0.394974
1054.2	0.891623	0.238041	0.375346	0	0.177859	0.112569	0.0799148	0.222433	0.422446	0.116863	0.266707	0.130276	0.226689	0.200825	0.132815	0.360283	0.165341	0.229527	0.0681742	0.351447	0.366316	0.0588192	0.144914	0.221695	0.219946	0.359489	0.435386	0.488864	0.407911	0.427188	0.226842	0.233168	0.330163	0.256367	0.318856	0.291499	0.249021	0.306243	0.26459	0.395595	0.441088	0.265446	0.593763	0.150437	0.218856	0.196329	0.303192	0.320332	0.484062
1053.08	0.874096	0.322406	0.448367	0.226838	0.223356	0.198714	0.199224	0.119362	0.509304	0.248525	0.242845	0.143683	0.200467	0.217528	0.168525	0.310494	0.166965	0.137307	0.0639253	0.298799	0.341982	0.0913519	0.222741	0.161865	0.224595	0.319016	0.411017	0.472985	0.349731	0.41777	0.176247	0.241936	0.291986	0.175081	0.279605	0.309039	0.219853	0.289974	0.248357	0.403378	0.525536	0.0681112	0.822004	0.143257	0.227612	0	0.284198	0.289743	0.465682
1051.96	0.810713	0.224135	0.371065	0.324314	0.269805	0.284359	0.267709	0.0157568	0.35921	0.364999	0.257287	0.10216	0.190767	0.227969	0.160236	0.25645	0.139236	0.159776	0.059287	0.294298	0.291572	0.180584	0.391978	0.150115	0.200484	0.325749	0.470774	0.463594	0.292541	0.414533	0.20902	0.258735	0.298772	0.216649	0.265592	0.332858	0.205644	0.281313	0.236111	0.345412	0.348532	0.212934	0.710174	0.0700159	0.299947	0.223859	0.137889	0.20175	0.66892
1050.83	0.961028	0.0308346	0.145805	0.224849	0.204067	0.334286	0.283574	0.0383656	0.238585	0.434901	0.340385	0.079559	0.125847	0.230897	0.165091	0.238724	0.0996126	0.180832	0.0838233	0.310034	0.262099	0.257956	0.428805	0.207282	0.202621	0.311453	0.509849	0.435962	0.331248	0.383494	0.255359	0.225172	0.261926	0.129327	0.285397	0.336275	0.179666	0.303472	0.274585	0.334034	0.374534	0.492819	1.02432	0.164974	0.28865	0.506731	0.142002	0.31035	0.654072
1049.71	0.465142	0.145953	0	0.19382	0.251774	0.458995	0.264971	0.116113	0.20622	0.370122	0.291495	0.0242789	0.0248106	0.193584	0.14621	0.191319	0.0793052	0.22322	0.0656746	0.242024	0.267573	0.319695	0.307613	0.167696	0.150419	0.317004	0.53926	0.454904	0.343184	0.345867	0.256856	0.19448	0.272555	0.186592	0.234995	0.300968	0.178513	0.305056	0.293048	0.335696	0.195464	0.783814	1.02423	0.405051	0.401519	0.579974	0.434694	0.437369	0.643889
1048.59	0.66311	0.420243	0.13136	0.363045	0.434564	0.749046	0.460506	0.39409	0.442782	0.361913	0.287551	0.0398367	0.0831494	0.207693	0.171133	0.287203	0.0979286	0.242502	0.0889146	0.315257	0.304426	0.216063	0.249417	0.143915	0.210527	0.347496	0.600122	0.508468	0.357137	0.360419	0.302986	0.118172	0.306385	0.171824	0.291739	0.302756	0.211279	0.345444	0.280882	0.35479	0.23308	0.773754	1.19856	0.212007	0.3867	0.725967	0.707925	0.724313	0.649576
1047.47	0.146488	0.570897	0.238515	0.446841	0.377509	0.581281	0.503569	0.292937	0.321758	0.441736	0.290449	0.0912194	0.161688	0.266899	0.183339	0.356453	0.110131	0.229951	0.0844086	0.313761	0.284746	0.180221	0.201194	0.162468	0.185322	0.405958	0.61472	0.591158	0.453348	0.421968	0.328094	0.121546	0.407993	0.16079	0.269311	0.296196	0.200655	0.365269	0.291149	0.360716	0.414968	0.742728	1.33452	0.367779	0.341398	0.711051	0.856992	0.837918	0.396585
1046.34	0.103874	0.648146	0.429905	0.604414	0.3952	0.496771	0.619758	0.617629	0.220695	0.52469	0.301854	0.182077	0.277682	0.282417	0.235251	0.399542	0.126313	0.211833	0.137797	0.381038	0.302362	0.26377	0.198349	0.229923	0.138214	0.491858	0.599484	0.631981	0.478606	0.488522	0.360015	0.151145	0.427274	0.224843	0.314495	0.322309	0.202122	0.393115	0.370008	0.387042	0.537224	0.708223	1.3183	0.872194	0.478272	1.05744	0.790983	0.782929	0.236877
1045.22	0.0224441	0.553158	0.621373	0.578331	0.296413	0.280001	0.599828	0.648974	0.144294	0.617577	0.359552	0.236535	0.330693	0.305107	0.301303	0.389707	0.236743	0.206075	0.153246	0.462394	0.34128	0.294678	0.319535	0.309321	0.132445	0.594602	0.601682	0.665789	0.531259	0.533038	0.400538	0.282817	0.450636	0.362274	0.415215	0.364038	0.235099	0.411624	0.447173	0.39254	0.549887	0.899305	1.24044	0.945859	1.01842	1.44586	0.73581	0.815578	0.272442
1044.09	0.160936	0.494042	0.557998	0.34098	0.122453	0.172786	0.173242	0.640555	0.186423	0.523803	0.460225	0.285921	0.285667	0.342359	0.356292	0.454948	0.282415	0.262971	0.16442	0.596463	0.410965	0.313015	0.428311	0.377853	0.179861	0.674851	0.583629	0.680739	0.562973	0.518968	0.462506	0.418659	0.477415	0.472221	0.469261	0.410934	0.266819	0.462322	0.501532	0.456826	0.57085	0.745475	1.25807	1.05397	1.25378	1.60036	0.977356	0.797445	0.370609
1042.97	0.673013	0.462723	0.386923	0.180505	0.079242	0.199831	0	0.366492	0.0793821	0.0386641	0.458451	0.289699	0.251471	0.299249	0.371371	0.501478	0.352259	0.266813	0.144014	0.544802	0.435569	0.300665	0.564126	0.335206	0.336575	0.722666	0.601508	0.705623	0.599714	0.561219	0.532971	0.55945	0.575625	0.672257	0.53518	0.451561	0.318093	0.512516	0.567979	0.487356	0.604029	0.698247	1.36957	1.17757	1.30661	1.46747	1.36095	0.985301	0.742888
1041.85	1.39649	0.628671	0.555843	0.386665	0.133577	0.342524	0.137402	0.48717	0.298651	0.119375	0.499703	0.349354	0.262457	0.348716	0.375066	0.643171	0.362751	0.369183	0.169052	0.618766	0.45227	0.269468	0.699901	0.345088	0.542858	0.733194	0.680485	0.760657	0.611847	0.637211	0.634584	0.650993	0.656657	0.762697	0.712467	0.488854	0.406397	0.564305	0.578474	0.504862	0.879318	0.889529	1.75448	0.929222	1.3402	1.25911	1.29157	1.22424	0.951802
1040.72	1.30516	0.466751	0.55523	0.246415	0	0.328289	0.136233	0.239645	0.277175	0.251689	0.513386	0.346087	0.354196	0.377077	0.412238	0.749708	0.342002	0.44295	0.25719	0.60488	0.468162	0.317249	0.762862	0.392516	0.607732	0.747864	0.724147	0.865408	0.669335	0.732245	0.738931	0.727893	0.708279	0.749625	0.864372	0.51241	0.447642	0.649234	0.625871	0.547261	1.05075	1.07617	1.74067	0.950151	1.26108	1.18316	1.46807	1.54369	0.894934
1039.6	1.52384	0.347028	0.518761	0.331424	0.159497	0.228584	0.37694	0.478283	0.292058	0.272583	0.545158	0.406262	0.453695	0.384711	0.508222	0.789688	0.359887	0.551558	0.329267	0.60568	0.530373	0.437816	0.678033	0.5197	0.624922	0.747103	0.808078	0.864992	0.704975	0.806839	0.80955	0.763785	0.689664	0.758487	0.972094	0.535321	0.481703	0.706679	0.701528	0.60647	1.32497	1.51797	1.61293	0.939656	1.41841	1.46576	1.4311	1.66216	1.08135
1038.47	0.978469	0.249962	0.783775	0.344036	0.380352	0.20408	0.517103	0.564959	0.38224	0.443566	0.54458	0.455579	0.520531	0.470919	0.573657	0.827189	0.426498	0.6256	0.430725	0.616078	0.59227	0.510688	0.597633	0.566485	0.708776	0.746826	0.817521	0.872101	0.749733	0.867256	0.879794	0.82042	0.686798	0.802013	0.988181	0.535903	0.539468	0.72945	0.750588	0.669784	1.57138	1.78899	1.27586	1.01552	1.80696	1.62079	1.62862	1.67103	1.16452
1037.34	0.43826	0.202253	1.03239	0.326051	0.378444	0.324046	0.35851	0.717147	0.526763	0.459425	0.583836	0.576641	0.604961	0.621768	0.689951	0.879697	0.50693	0.75422	0.53065	0.673493	0.670909	0.589746	0.550585	0.653464	0.772653	0.837917	0.859514	0.940672	0.890225	0.920487	0.99142	0.924755	0.863472	0.884666	1.00389	0.596843	0.603532	0.813007	0.794384	0.77339	1.72471	1.79059	1.20761	1.27058	1.93704	1.70968	2.21955	1.78389	1.54774
1036.22	0.850444	0.297484	0.973891	0.291819	0.466177	0.316137	0.401297	0.728724	0.368959	0.504118	0.602115	0.71933	0.686598	0.772382	0.827713	0.888802	0.632849	0.779734	0.621662	0.746738	0.724611	0.661958	0.527835	0.715841	0.912011	0.938695	0.932381	1.01151	1.02475	0.969419	1.17824	1.04361	1.00212	0.997808	1.04549	0.680613	0.704991	0.912737	0.89855	0.872921	1.73658	2.00561	1.52305	1.53379	1.89452	1.98258	2.5304	1.81681	1.99441
1035.09	1.01871	0.574455	1.11524	0.582789	0.487731	0.355883	0.408003	0.740351	0.311569	0.764614	0.845186	0.891504	0.845303	0.95264	0.949546	1.05124	0.773586	1.03872	0.842397	0.961335	0.8844	0.908089	0.764321	0.919958	1.13077	1.10273	1.07655	1.18673	1.25009	1.13862	1.39905	1.23363	1.27921	1.20985	1.21798	0.822117	0.873709	1.09592	1.0628	1.02359	1.82845	2.34461	2.39611	2.13868	2.33929	2.06728	2.63263	2.0218	2.13342
1033.97	1.18362	0.588602	1.00363	0.728937	0.372322	0.383794	0.279761	0.46661	0.23881	0.913824	1.06198	1.0356	1.11822	1.15451	1.17209	1.30456	1.03467	1.26458	1.08757	1.26172	1.12748	1.12574	1.10923	1.16436	1.36246	1.30741	1.24888	1.3866	1.45853	1.33924	1.68037	1.47777	1.51788	1.40708	1.52534	1.01247	1.07278	1.31403	1.30232	1.19073	2.03268	2.59475	2.88592	2.77032	2.73931	2.13123	3.03525	2.6617	2.21165
1032.84	1.9489	0.749369	0.878268	0.788056	0.451783	0.371411	0.383714	0.468957	0.258937	0.805022	1.26485	1.21563	1.33262	1.37918	1.48804	1.5888	1.40242	1.5209	1.323	1.5853	1.41879	1.46156	1.41695	1.45067	1.68401	1.45013	1.45724	1.5602	1.73534	1.54292	1.96265	1.73778	1.81079	1.64847	1.89273	1.26111	1.28421	1.5324	1.58728	1.3955	2.5314	2.95384	3.40643	3.1948	3.12399	2.63546	3.30165	3.09523	2.52917
1031.71	2.329	0.771965	1.0283	0.706433	0.596213	0.431386	0.489941	0.505551	0.363233	0.867502	1.44588	1.42328	1.56716	1.62022	1.71226	1.9933	1.70505	1.8035	1.57106	1.84161	1.70428	1.74887	1.73538	1.67918	2.07672	1.57318	1.60339	1.72561	1.99172	1.7159	2.22055	1.93022	2.04827	1.90083	2.14144	1.46061	1.54022	1.72155	1.86272	1.60531	2.91316	3.53148	3.49154	3.60732	3.73402	3.32199	3.59739	3.40361	2.75895
1030.59	2.33156	0.58707	1.01104	0.46266	0.394533	0.431213	0.48332	0.472038	0.246489	0.426131	1.64366	1.65696	1.72685	1.83989	1.92971	2.17233	2.05499	2.02061	1.79214	1.96518	1.81388	1.96288	1.96125	1.86766	2.3789	1.70558	1.70073	1.84126	2.25679	1.83627	2.39099	2.04934	2.25009	2.0436	2.3663	1.65232	1.72518	1.91574	2.06109	1.71857	3.4302	4.01325	3.78819	3.63248	3.95118	3.67408	3.72752	3.71109	3.09252
1029.46	2.0596	0.39592	1.01657	0.461541	0.348923	0.42835	0.625394	0.546153	0.186511	0.321065	1.81555	1.87711	1.83186	2.02816	2.06115	2.21209	2.23961	2.04665	1.94028	2.01836	1.826	2.0352	1.99771	2.00435	2.47048	1.79696	1.7764	1.90352	2.37523	1.86222	2.42523	2.03727	2.19152	2.04536	2.42166	1.77644	1.79798	2.03666	2.14704	1.80956	3.26298	4.54768	3.76907	3.46961	3.65323	3.80441	3.61544	3.60749	3.39017
1028.33	1.3859	0.41947	0.981881	0.48232	0.395315	0.629259	0.695812	0.559645	0.048803	0.372208	2.06994	2.05298	1.92768	2.08825	2.08863	2.22503	2.27777	2.13475	2.02764	1.95629	1.8243	2.07411	1.99309	2.06929	2.41266	1.85841	1.8577	2.00074	2.35095	1.98077	2.32626	1.95387	2.0918	1.97936	2.3271	1.89882	1.80379	2.16783	2.15571	1.88771	3.15573	4.35574	3.85305	3.56385	3.61796	3.37713	3.51237	3.57915	3.30413
1027.2	0.635664	0.453979	0.917507	0.516511	0.419971	0.608497	0.675571	0.474693	0.18321	0.432055	2.19688	2.22277	2.06003	2.1714	2.18727	2.21187	2.14714	2.1277	2.12685	2.00462	1.84372	2.04554	2.09048	2.05323	2.28042	1.90322	1.92263	2.10344	2.25186	2.1338	2.20891	1.86221	1.94393	1.86812	2.19499	2.00732	1.81792	2.18611	2.187	1.95645	3.10921	3.99452	3.70364	3.60031	3.57934	3.06247	3.78525	3.46736	3.14602
1026.08	0.660787	0.484588	0.77188	0.455179	0.513732	0.60795	0.661851	0.599497	0.212494	0.406919	2.22455	2.35061	2.11656	2.19847	2.2636	2.06667	2.00897	2.10716	2.17159	2.02922	1.88856	2.07857	2.13071	1.97365	2.19326	1.83871	1.94635	2.11424	2.16892	2.25956	2.09701	1.76041	1.78592	1.75777	2.06835	2.09538	1.81452	2.20255	2.15399	2.03339	3.0459	3.93165	3.8768	3.68547	3.41871	3.10748	3.74283	3.17195	3.1886
1024.95	0.705877	0.328607	0.505614	0.292106	0.644526	0.449614	0.547045	0.746981	0.258835	0.465914	2.13911	2.40498	2.16967	2.23598	2.20232	2.00257	1.88095	2.12282	2.18385	2.05265	1.98995	2.14845	2.15382	1.94416	2.23398	1.86201	1.96605	2.13913	2.08925	2.32834	2.05834	1.69636	1.74899	1.73341	1.94993	2.13118	1.8703	2.18938	2.17294	2.12168	2.91996	3.62918	4.01358	3.57342	3.61641	3.30201	3.91859	3.10051	3.18101
1023.82	0.363353	0.297847	0.171827	0.281611	0.73116	0.255231	0.483781	0.746019	0.356297	0.171127	2.158	2.4102	2.23599	2.30705	2.22831	1.9954	1.90384	2.12798	2.30499	2.16197	1.98646	2.291	2.30536	1.91223	2.28936	1.88578	1.95559	2.10773	2.0866	2.34193	2.10029	1.72612	1.82568	1.80282	2.00334	2.16204	1.94205	2.22041	2.22127	2.16627	2.71788	3.82246	4.14447	3.3308	3.63984	3.29849	3.8973	3.05597	3.05557
1022.69	0.184264	0.121454	0.398609	0.402752	0.87138	0.166927	0.630841	0.936077	0.555613	0.118425	2.16673	2.44463	2.3042	2.40293	2.23153	2.06427	1.98482	2.17908	2.43778	2.21429	2.00886	2.34905	2.42618	2.04961	2.33165	1.92286	2.00561	2.11145	2.1386	2.29318	2.19792	1.87151	1.93495	1.91354	2.15082	2.20362	2.04889	2.27319	2.19706	2.23019	2.38607	4.08462	3.88587	3.29096	3.72587	3.16162	3.78277	3.11275	3.05504
1021.56	0.918409	0.31358	0.4559	0.264506	0.870836	0.288628	0.741529	1.07851	0.632936	0.270784	2.28406	2.41356	2.26945	2.43972	2.25318	2.20274	2.145	2.31845	2.47893	2.17746	2.08085	2.33445	2.3935	2.10901	2.30247	1.95786	2.0161	2.12448	2.14937	2.30518	2.37731	2.06922	2.10128	2.00815	2.37211	2.22669	2.07379	2.34468	2.23182	2.26751	2.25497	3.83261	3.77148	3.26858	3.57175	2.92499	3.34667	3.29851	3.00361
1020.43	1.17348	0.609732	0.727754	0.236012	0.786057	0.298267	0.840004	1.01634	0.868695	0.242521	2.31873	2.3472	2.24536	2.43005	2.33608	2.34621	2.16712	2.39434	2.54985	2.15168	2.18435	2.29145	2.44328	2.15789	2.3134	1.97777	2.00871	2.1606	2.15301	2.3254	2.57964	2.23376	2.22539	2.09388	2.54916	2.22016	2.0739	2.36151	2.26082	2.2767	2.30691	3.77831	3.22336	3.19712	3.47566	3.01367	3.38088	3.1016	2.97573
1019.3	1.35302	0.655451	0.737892	0.299953	0.616633	0.271449	0.719342	0.916372	0.892655	0.314723	2.26128	2.23368	2.09665	2.30723	2.34732	2.31221	2.20417	2.40738	2.50775	2.01282	2.19216	2.29115	2.39255	2.11394	2.27699	1.92233	1.97394	2.08474	2.10292	2.27692	2.7039	2.31346	2.36203	2.1398	2.63205	2.12923	2.01023	2.32975	2.21666	2.21733	2.15539	3.60716	2.79358	3.22275	3.22228	3.07251	2.91329	2.85341	3.02608
1018.17	1.81269	0.769983	0.62409	0.427561	0.536485	0.331103	0.565728	1.01808	0.702375	0.510791	2.11998	2.04299	1.92431	2.14401	2.22753	2.27121	2.15425	2.3843	2.39102	1.88157	2.15492	2.26276	2.3153	2.02621	2.2127	1.91983	1.96629	2.07497	2.04808	2.26994	2.79033	2.37237	2.40357	2.13787	2.66196	2.03164	1.91669	2.24871	2.16432	2.15367	2.20278	2.94196	2.8781	3.01774	2.93823	3.04535	2.90917	2.66722	2.94208
1017.04	1.44296	1.20363	0.683555	0.67826	0.75716	0.38154	0.511515	1.03048	0.858826	0.737035	2.02262	1.86325	1.78705	1.9856	2.15247	2.27431	2.01815	2.29051	2.33416	1.94809	2.08971	2.21244	2.36327	1.99086	2.11915	1.9136	1.96004	2.04385	2.08365	2.27038	2.88776	2.40252	2.50314	2.23758	2.73496	1.97015	1.8747	2.16978	2.17042	2.09844	2.05246	2.73288	2.86908	2.87808	2.89542	2.77193	2.791	2.54128	2.63355
1015.91	1.59294	1.12085	1.05896	0.672784	0.793338	0.508928	0.518661	0.983912	0.924846	0.861438	1.88264	1.76191	1.79411	1.81129	2.02947	2.25692	1.92839	2.18303	2.22622	1.93042	1.98698	2.1314	2.36017	1.99978	2.08227	1.87516	1.91823	2.01717	2.15532	2.20895	2.95909	2.40537	2.56412	2.2795	2.79833	1.90722	1.9044	2.13357	2.09823	2.08429	2.01711	2.60096	2.96926	2.87653	2.94049	2.49074	2.65725	2.67897	2.26358
1014.78	1.67421	1.0158	1.0437	0.655046	0.912763	0.507141	0.613597	0.774405	0.784419	0.867005	1.8582	1.63961	1.77989	1.6909	1.89183	2.10347	1.82375	2.15302	2.09582	1.87897	1.89492	1.89362	2.28173	1.90333	1.96534	1.7891	1.80481	2.00702	2.23534	2.19029	3.04079	2.38952	2.65128	2.28872	2.94164	1.76777	1.82833	2.05599	2.04686	1.98716	1.9327	2.89486	3.11373	2.80108	2.62772	2.48168	2.50828	2.72319	1.8469
1013.65	1.54997	1.01865	1.35582	0.688994	0.933692	0.570576	0.766447	0.556727	1.04741	0.80322	1.7608	1.54617	1.73038	1.59458	1.75086	1.96006	1.66355	2.02285	1.90777	1.71883	1.77616	1.69424	2.07423	1.77154	1.87982	1.67259	1.65901	1.91977	2.24811	2.06466	2.97169	2.25762	2.60364	2.27305	2.90103	1.61695	1.72097	1.94567	1.93167	1.87707	1.92167	2.97553	2.86128	3.06018	2.52592	2.51102	2.55726	2.47239	1.78035
1012.52	1.3875	0.996379	1.53759	0.861133	0.980631	0.563073	0.879684	0.39162	1.2616	0.997603	1.67352	1.47939	1.55495	1.57389	1.69012	1.84735	1.57365	1.85922	1.7289	1.59996	1.59744	1.59164	1.84411	1.66436	1.7438	1.51658	1.52028	1.80124	2.17372	1.92543	2.9018	2.12181	2.70971	2.27079	2.78876	1.47442	1.58805	1.80022	1.80773	1.72786	1.78408	3.26332	2.76714	3.20825	2.52495	2.71766	2.61516	2.62359	1.81828
1011.39	1.63072	1.02307	1.74868	1.08877	1.13702	0.746557	0.950679	0.464036	1.39147	1.29065	1.59524	1.5065	1.44723	1.58298	1.62743	1.78804	1.52625	1.80628	1.60624	1.52117	1.52211	1.46257	1.76484	1.58049	1.69737	1.43241	1.42939	1.7705	2.15366	1.85458	2.79837	2.05549	2.64396	2.26903	2.64552	1.37206	1.47186	1.6569	1.66865	1.62774	2.00032	2.97801	2.93167	3.08711	2.76546	2.92377	2.87906	2.53452	2.08184
1010.25	1.7225	1.33226	1.8582	1.18184	1.49392	0.876539	0.855714	0.683363	1.79747	1.52325	1.58329	1.55554	1.36413	1.64611	1.63503	1.74216	1.57532	1.72901	1.55809	1.62617	1.5269	1.38003	1.6858	1.60202	1.66796	1.38153	1.3677	1.70622	2.1417	1.82001	2.74801	2.0215	2.68152	2.29585	2.57095	1.35795	1.41824	1.55936	1.64674	1.59202	2.19794	2.65857	3.10665	2.98494	3.04518	2.85809	2.83483	2.76889	2.33993
1009.12	2.35817	1.58917	2.121	1.08027	1.65691	1.0341	0.999133	0.800955	2.05159	1.66534	1.63638	1.73244	1.5106	1.69615	1.69415	1.89739	1.72941	1.78558	1.53283	1.72272	1.58869	1.43901	1.72712	1.74851	1.80191	1.41117	1.36418	1.736	2.16752	1.7798	2.73924	2.01132	2.76778	2.40948	2.65621	1.39952	1.47022	1.59403	1.68622	1.64516	2.40605	2.71163	3.40477	2.86648	3.3021	2.80056	2.62767	3.00907	2.78565
1007.99	2.32295	1.70718	2.21991	1.24784	2.11404	1.11992	1.35467	0.579674	2.26806	1.70674	1.76644	1.95397	1.65899	1.78044	1.72811	1.96159	1.87258	1.95776	1.5881	1.85045	1.73606	1.37623	1.83811	1.84024	1.84928	1.44724	1.38819	1.78728	2.28268	1.80902	2.83807	2.03559	2.89349	2.50057	2.82711	1.46573	1.59094	1.64597	1.79241	1.78022	2.73688	2.95665	3.47462	2.67225	3.42579	3.08716	2.81126	3.31009	2.75237
1006.86	3.02062	2.19353	2.28851	1.34121	2.15541	1.29714	1.71473	0.501229	2.41555	1.75181	2.01416	2.32299	1.85269	1.90633	1.8565	2.11995	2.06881	2.15047	1.71482	1.9758	2.02488	1.45702	2.01855	2.05577	2.02888	1.61455	1.4662	1.785	2.42714	1.87388	2.88859	2.05599	3.03378	2.54138	2.99987	1.74454	1.90372	1.84813	2.03345	2.10611	3.03324	3.30275	3.64673	3.10655	3.64821	3.25495	2.79569	3.2584	3.04485
1005.72	3.45348	2.60732	2.39899	1.50839	2.20827	1.43041	1.90267	0.515502	2.42211	1.95697	2.29986	2.85039	2.13022	2.24355	2.14617	2.42198	2.46228	2.46357	1.98436	2.29986	2.43152	1.7955	2.37059	2.55213	2.41231	1.93112	1.70154	1.97951	2.62796	2.12475	3.07067	2.16389	3.2189	2.61128	3.12289	2.36416	2.5376	2.31367	2.57698	2.70069	3.42867	4.18398	3.86234	3.51594	4.06401	4.02524	3.33687	3.78722	3.50437
1004.59	3.43116	2.53285	2.39049	1.5691	2.17723	1.52714	1.94564	0.60079	2.3999	2.01572	2.82924	3.73164	2.80059	2.84303	2.66359	2.8761	3.19631	2.96024	2.48529	2.8048	3.08685	2.3852	2.96504	3.30544	3.28673	2.47945	2.1347	2.41407	3.01759	2.64995	3.25347	2.36016	3.43072	2.7638	3.27141	3.34237	3.56708	3.10023	3.4286	3.66439	4.07921	4.83136	4.24557	4.20206	4.7467	4.6056	4.15503	4.01389	4.11672
1003.46	3.28727	2.66748	2.40518	1.71129	2.38213	1.68388	2.22573	1.28749	2.6174	2.20129	3.68579	4.86203	3.74697	3.75586	3.33932	3.40678	4.12515	3.60877	3.21848	3.53139	3.89675	3.26552	3.78058	4.16296	4.28338	3.13223	2.82546	2.93373	3.51884	3.35252	3.51312	2.67077	3.58518	3.06368	3.49574	4.53844	4.76762	4.11695	4.4825	4.71971	4.51492	5.5559	4.58054	4.93812	5.36047	4.88142	4.78234	4.64532	4.65095
1002.32	3.51337	2.84317	2.76808	1.9043	2.76743	1.92595	2.63829	2.31452	3.02402	2.42957	4.77138	6.15672	4.90065	4.83212	4.11083	4.08925	5.01398	4.47253	4.14513	4.29552	4.71331	4.32401	4.67915	5.03554	5.29543	3.76252	3.65084	3.59657	4.01497	4.12609	3.84413	3.06232	3.8558	3.4966	3.88577	5.7267	5.78685	5.13914	5.46756	5.60187	5.02893	6.05201	4.97605	5.59197	5.79203	5.09606	5.20832	5.14866	5.02466
1001.19	3.52392	2.85182	3.16912	2.12746	3.39195	2.25634	2.94485	3.32412	3.59187	3.02711	5.89379	7.39769	5.93359	5.8516	4.78694	4.71684	5.67052	5.28463	5.13863	4.93385	5.58825	5.25424	5.54215	5.52536	5.80404	4.19358	4.39691	4.08343	4.36562	4.74258	4.20533	3.44673	4.0703	3.8762	4.21794	6.58605	6.26774	5.86151	6.01573	6.14234	5.10748	5.91067	5.16965	5.78032	5.94495	5.29383	5.44232	5.4438	4.77031
1000.06	3.80142	3.34268	3.56102	2.47946	3.72839	2.5378	3.29191	4.41075	4.08517	3.616	6.83181	8.42226	6.70385	6.70116	5.34253	5.34187	6.06373	6.05361	6.07085	5.4381	6.25648	6.03951	6.21727	5.89611	6.03404	4.37757	4.98541	4.39329	4.48931	5.16918	4.33354	3.79005	4.36381	4.17551	4.52554	7.06776	6.33058	6.28239	6.16616	6.30451	4.6821	5.53662	5.33816	5.54856	5.58084	5.1124	5.30537	5.59644	4.49342
998.922	3.67889	3.41964	3.8692	2.69952	3.90009	2.7057	3.15305	4.97081	4.18762	3.89909	7.53264	9.12901	7.22477	7.43381	5.91327	5.95287	6.37143	6.71531	6.96821	5.87138	6.89806	6.72603	6.74249	6.30205	6.21144	4.49051	5.37779	4.64426	4.59385	5.4569	4.54218	4.13068	4.58771	4.43049	4.71862	7.37901	6.31476	6.58177	6.23555	6.42018	4.53578	5.02853	5.28489	5.13975	5.2132	5.17539	4.96925	5.69242	4.6405
997.787	3.75402	3.48251	4.11111	2.94813	3.84066	2.87621	3.20133	5.2564	4.20098	3.90835	8.02079	9.55723	7.56107	7.88848	6.45013	6.53042	6.80111	7.24754	7.64541	6.3753	7.48403	7.36264	7.10378	6.75943	6.56786	4.58595	5.50525	4.84171	4.69828	5.69402	4.71519	4.52759	4.94183	4.79239	4.96079	7.5825	6.44007	6.89216	6.39317	6.64427	4.39875	4.77212	5.28056	4.85853	4.89866	5.11195	4.91402	5.37445	4.81715
996.652	4.34966	3.6482	4.33714	3.26067	3.96394	3.14925	3.6276	5.00686	4.12238	3.90548	8.20787	9.61333	7.57029	8.01984	6.8372	6.96081	7.26031	7.63769	8.03577	6.81451	7.87265	7.78339	7.43325	7.24216	7.00428	4.7091	5.47793	5.03345	4.81624	5.75637	4.91129	4.96244	5.10382	5.23911	5.18967	7.59642	6.70802	7.11006	6.65048	6.8978	4.5555	5.00244	5.20343	5.04911	4.96824	5.00771	4.76054	5.35895	5.12697
995.518	5.03173	3.79061	4.55762	3.48269	4.18889	3.48629	3.92576	4.63675	4.36001	3.93971	8.03552	9.12707	7.25609	7.74522	6.92467	7.04422	7.43814	7.6955	7.99906	6.97919	7.84624	7.80085	7.46129	7.43129	7.30933	4.6745	5.20116	5.03892	4.92657	5.59172	5.10197	5.32818	5.15855	5.58434	5.40695	7.32753	6.79805	7.05628	6.76405	6.97037	5.00511	5.20376	5.06424	5.3005	5.05482	5.03948	4.70177	5.23294	5.18875
994.382	5.25715	4.11266	4.57852	3.44151	4.40112	3.72755	3.94976	4.14808	4.72678	4.13775	7.40595	8.28612	6.78121	7.17345	6.59932	6.84934	7.19361	7.32036	7.59966	6.76258	7.48874	7.47922	7.25936	7.18884	7.13874	4.45196	4.6885	4.79622	4.6825	5.18699	5.24627	5.43291	5.22135	5.7382	5.51575	6.68779	6.48702	6.60136	6.50497	6.65799	4.99639	5.05933	4.73215	5.28061	5.26184	5.16944	4.66002	5.11544	4.80069
993.246	5.11735	4.61439	4.88012	3.62817	4.66671	3.98505	4.17862	3.87018	5.29625	4.46704	6.51218	7.21442	6.0108	6.35394	5.9425	6.30389	6.54768	6.68634	6.93861	6.21197	6.68779	6.74621	6.69151	6.57552	6.58298	3.98725	4.05772	4.34998	4.13648	4.61966	5.06274	5.22344	5.24173	5.65774	5.42462	5.7337	5.89153	5.81918	5.866	5.9347	4.99328	4.83536	4.3991	5.23537	4.93012	4.74343	4.7453	4.99617	4.43124
992.11	4.51388	4.63851	4.96933	3.75445	4.73725	3.9715	4.19962	3.46654	5.38804	4.57344	5.72631	6.20034	5.44369	5.77445	5.40206	5.6925	5.7681	5.96633	6.40355	5.61827	5.95988	6.08668	6.10335	5.91406	5.9014	3.51618	3.49744	3.84709	3.62342	4.21044	4.92785	4.89341	5.27264	5.49168	5.34834	4.87119	5.22466	5.06129	5.19524	5.23749	5.01701	4.52812	4.18992	5.14375	4.79291	4.43003	4.55767	4.78613	4.2205
990.974	4.06146	4.51894	4.99378	3.74256	4.63753	3.88882	4.14984	3.14116	5.27497	4.38944	4.99261	5.39334	4.97085	5.21335	4.84102	5.12048	5.03453	5.29704	5.89908	5.11239	5.25458	5.53008	5.40012	5.19794	5.16431	3.04096	3.03539	3.36557	3.13094	3.82489	4.73016	4.5165	5.20274	5.21822	5.22631	4.17717	4.61142	4.43021	4.56083	4.5763	4.92419	4.33234	4.15436	4.85015	4.53709	4.30246	4.18348	4.49021	3.97861
989.837	4.30309	4.40149	4.94328	3.93079	4.68961	3.80173	4.23954	2.66947	4.96675	4.3521	4.49105	4.81069	4.48702	4.70131	4.36275	4.6003	4.47499	4.69186	5.48554	4.61868	4.64959	5.01512	4.79377	4.6215	4.58212	2.65599	2.68584	2.98793	2.62376	3.45467	4.54798	4.11876	4.94644	4.86416	4.99025	3.67192	4.16626	3.92099	4.08516	4.11718	4.62877	4.067	4.0705	4.72905	4.28993	3.97745	3.87138	4.2216	3.83529
988.7	4.83559	4.60261	5.16765	3.9986	5.01004	4.04585	4.51265	2.711	5.20416	4.44285	4.10073	4.32918	4.02507	4.28591	3.95741	4.15225	3.91369	4.1948	5.0831	4.16098	4.1718	4.57175	4.28518	4.18996	4.19089	2.32315	2.44783	2.6328	2.32159	3.12942	4.38207	3.82669	4.62211	4.51591	4.75411	3.31632	3.87289	3.55286	3.71695	3.77925	4.3549	3.63863	3.73008	4.14813	3.60835	3.91974	3.59527	4.01889	3.71289
987.563	5.39049	4.87202	5.1407	4.09474	5.21987	4.11181	4.62576	2.66774	5.3501	4.54311	3.73682	3.97814	3.74931	4.00378	3.47945	3.83121	3.55	3.79365	4.68947	3.78319	3.79987	4.29546	3.92798	3.80756	3.79168	2.06588	2.18669	2.32785	2.026	2.88698	4.25644	3.61477	4.48187	4.23589	4.59706	3.09131	3.64883	3.20517	3.42029	3.49974	3.98008	3.08987	3.43526	3.42937	3.16573	3.97772	3.34924	3.95298	3.34443
986.427	6.13142	5.25863	5.51439	4.40432	5.4712	4.51295	4.81834	2.91988	5.79668	4.86029	3.49986	3.62469	3.42751	3.7096	3.14572	3.46041	3.35309	3.54534	4.36795	3.39716	3.59194	3.99694	3.68766	3.48097	3.51462	1.89325	1.98999	2.08767	1.76015	2.6426	4.08409	3.52605	4.4039	4.07108	4.36853	2.85262	3.48772	2.92343	3.23052	3.24382	4.24942	2.92633	3.05047	3.11594	2.7381	3.57959	3.46924	3.62921	3.39406
985.289	6.18237	5.22704	5.54387	4.64499	5.44629	4.53239	4.68674	2.75124	5.73597	5.02163	3.30687	3.31743	3.16838	3.55383	2.9966	3.24989	3.23843	3.37791	4.15841	3.23214	3.42005	3.85345	3.56993	3.33197	3.3174	1.79923	1.84316	1.93396	1.62416	2.52757	4.0565	3.60749	4.5404	4.12256	4.35979	2.6908	3.40358	2.78365	3.16355	3.14777	4.34769	2.72026	2.73182	3.02358	2.87574	3.68687	3.69193	3.44761	3.31719
984.151	5.97975	5.20909	5.50036	4.69582	5.39035	4.64047	4.79682	2.51576	5.89327	5.17503	2.95602	3.02358	2.95686	3.29998	2.79038	3.13047	3.21678	3.23271	3.9943	3.04083	3.21179	3.5723	3.27106	3.1523	3.1359	1.68062	1.70453	1.79012	1.61168	2.3603	4.00375	3.63965	4.55331	4.13924	4.28498	2.54625	3.34426	2.63371	3.03983	3.04046	4.52107	3.23611	2.98466	2.9105	3.32853	4.00645	3.53248	3.29387	3.33998
983.013	5.59949	5.00618	5.68862	4.89599	5.46641	4.76694	4.87852	2.25823	5.93004	5.48968	2.76501	2.76584	2.79472	3.02688	2.60377	2.9496	3.04786	3.04675	3.79308	2.83173	3.0021	3.31162	2.94962	2.9558	3.11612	1.6305	1.54714	1.64515	1.52712	2.22541	3.98358	3.62409	4.4426	4.20411	4.27607	2.38029	3.32084	2.51042	2.92603	2.97094	4.34866	3.45562	3.04115	2.86972	3.53289	3.60387	3.26495	3.40621	3.22834
981.875	5.71082	5.05086	5.90864	4.88636	5.57061	4.96136	5.04646	2.38196	5.95612	5.44229	2.55965	2.59267	2.6109	2.80813	2.4541	2.8808	2.80362	2.87439	3.56936	2.65204	2.8629	3.07242	2.63655	2.8825	3.13531	1.54354	1.44452	1.56072	1.54664	2.10301	3.97982	3.53364	4.32997	4.14092	4.25311	2.21662	3.29464	2.42909	2.8108	2.9243	4.3108	3.24535	2.86146	2.82671	3.36045	3.51409	2.96257	3.49963	3.31168
980.736	5.76778	5.09529	5.7271	4.78041	5.40659	4.83414	4.98651	2.32157	5.61589	5.14367	2.3402	2.36168	2.47032	2.6138	2.21159	2.77206	2.66029	2.66442	3.28273	2.47854	2.62661	2.86045	2.40636	2.67286	2.94169	1.49498	1.28564	1.44253	1.48967	1.98596	3.92193	3.45953	4.30116	4.09492	4.26247	2.09194	3.24859	2.34461	2.65618	2.86401	4.18427	3.36609	2.98885	2.72381	3.14169	3.23922	2.5053	3.58205	3.34722
979.598	5.66897	5.33701	5.84411	4.88229	5.44024	4.98012	4.88669	2.62087	5.75566	5.06694	2.13008	2.13962	2.28599	2.39934	2.06636	2.52254	2.49783	2.44415	3.04902	2.25906	2.40099	2.58468	2.24227	2.44945	2.82123	1.4411	1.19682	1.33948	1.38834	1.8776	3.79737	3.3982	4.18766	4.04023	4.13525	1.95929	3.18026	2.24008	2.60523	2.782	4.0433	3.41402	2.80436	2.52672	2.84519	2.83691	2.52486	3.63039	3.23279
978.458	5.88598	5.443	5.68079	5.06475	5.31725	4.88394	4.76569	2.63169	5.54967	4.82942	1.93665	1.91521	1.97378	2.18736	1.9354	2.30011	2.34899	2.18244	2.79388	2.17871	2.07632	2.33896	2.09574	2.28088	2.58155	1.33201	1.08009	1.25501	1.32847	1.755	3.71042	3.3544	4.16675	3.9803	4.07896	1.83482	3.1161	2.13349	2.54767	2.74421	3.82352	3.46919	2.30751	2.74409	2.72652	2.97017	2.80108	3.52118	3.08563
977.318	5.84974	5.68	5.65573	5.211	5.41002	4.95723	5.15985	2.79532	5.56646	4.88352	1.67416	1.67849	1.7806	2.03795	1.77712	2.05307	2.21343	1.97091	2.61114	1.94475	1.80519	2.08766	1.83666	2.12529	2.35624	1.28248	1.00393	1.12195	1.3145	1.63751	3.60186	3.2792	4.06887	3.87233	3.88304	1.76114	3.06678	1.992	2.4773	2.66747	3.48093	3.84344	2.34677	2.6645	3.00486	3.33224	2.97198	3.56107	2.78708
976.18	5.49913	5.50345	5.85954	5.32023	5.67666	5.16549	5.42662	2.92408	5.70308	5.23309	1.49171	1.4902	1.61389	1.7722	1.61438	1.77203	2.00617	1.80606	2.45195	1.70912	1.54258	1.96118	1.59347	1.92363	2.21743	1.2203	0.898276	0.982382	1.30241	1.53954	3.43403	3.25922	3.8169	3.74941	3.73636	1.66477	3.00066	1.8604	2.38501	2.55895	3.11401	3.91882	2.53693	2.68995	2.99261	3.26394	2.98567	3.62018	2.33701
975.039	5.5797	5.41634	5.75769	5.35507	5.53175	5.2314	5.52655	3.08161	5.69177	5.48266	1.36236	1.36477	1.45453	1.60873	1.51501	1.57914	1.91697	1.73836	2.30455	1.60695	1.4354	1.77936	1.52091	1.88408	2.13385	1.17133	0.853239	0.935926	1.36217	1.49194	3.35132	3.23009	3.69967	3.56809	3.61881	1.60819	2.95214	1.81789	2.32389	2.52194	3.04482	3.63489	2.57422	2.59386	2.9074	3.17244	3.14325	3.50338	2.46637
973.899	5.60857	5.15866	5.40377	5.06023	5.2199	5.09217	4.97551	3.04635	5.38206	5.17465	1.31207	1.22561	1.41717	1.482	1.45125	1.45549	1.91409	1.70737	2.18111	1.53899	1.33961	1.74674	1.39687	1.79246	2.03053	1.21827	0.796121	0.888664	1.38606	1.41069	3.23647	3.25399	3.67365	3.38855	3.53055	1.56419	2.92042	1.79867	2.23648	2.48373	3.31127	3.71224	2.68932	2.52163	2.88211	2.62359	3.09802	3.41981	2.91013
972.759	5.46644	5.3807	5.29363	5.07721	5.34732	5.18766	4.67112	3.44663	5.60294	5.37975	1.26665	1.09455	1.40236	1.30467	1.41094	1.25992	1.88909	1.61299	2.09816	1.41791	1.20236	1.6037	1.25141	1.66605	1.95797	1.19353	0.744634	0.843597	1.42709	1.36053	3.0725	3.15001	3.53802	3.16792	3.37492	1.50803	2.86488	1.71712	2.18464	2.4666	3.47525	3.40526	2.81292	2.52754	2.78962	2.40461	3.20418	3.04898	2.87577
971.618	5.74378	5.59329	5.27028	5.33339	5.36945	5.27401	4.65801	3.80902	5.48381	5.1917	1.22746	1.02254	1.42489	1.24525	1.38563	1.2517	1.94121	1.51928	1.97252	1.39074	1.12359	1.46947	1.2137	1.59278	1.84886	1.20419	0.7029	0.867684	1.53635	1.3269	2.98084	3.02983	3.35104	3.00189	3.24596	1.48224	2.85377	1.6689	2.16317	2.485	3.94458	3.4786	2.57118	2.608	2.7676	2.47139	3.30487	3.07576	3.37269
970.478	5.28723	5.74506	5.19461	5.48516	5.45601	5.35362	4.57524	3.87644	5.29892	5.03157	1.18001	1.01664	1.48399	1.29659	1.40653	1.28707	2.00291	1.48471	1.92514	1.34931	1.0395	1.42662	1.12935	1.58968	1.89535	1.26642	0.756118	0.880528	1.68349	1.35191	2.95618	2.9866	3.2076	2.90515	3.06694	1.48202	2.87529	1.66912	2.13739	2.49087	4.21995	3.17561	2.7706	2.82456	3.08284	3.01723	3.41275	3.52815	3.51824
969.336	5.0342	5.54544	5.2414	5.64003	5.5243	5.4116	4.58701	4.08645	5.14153	4.99721	1.07662	1.02197	1.39731	1.23892	1.36682	1.26601	2.04177	1.41998	1.90561	1.2999	0.988796	1.39362	1.1235	1.57138	1.88329	1.22464	0.780246	0.846686	1.72275	1.33547	2.85746	2.9393	3.09303	2.82027	2.91587	1.43107	2.8619	1.66762	2.09573	2.45965	4.37522	2.95444	2.9182	3.01586	3.08507	3.40311	3.60361	3.80554	3.32362
968.194	4.90819	5.25807	5.19623	5.65944	5.24087	5.47534	4.78181	4.06785	5.15274	5.08512	1.04088	1.05177	1.25558	1.21606	1.35198	1.25827	2.07216	1.43297	1.8516	1.31313	0.919708	1.33485	1.20482	1.64058	1.86233	1.16789	0.771672	0.852635	1.76672	1.34276	2.83774	2.92448	3.06492	2.82853	2.83292	1.41815	2.87326	1.70405	2.10998	2.45298	4.38491	3.14792	3.06025	3.01817	3.18619	3.42923	3.80852	4.03283	3.64485
967.053	4.70836	4.85233	4.91354	5.24191	4.90234	5.12879	4.51605	3.71031	4.9592	4.75312	1.0514	1.0822	1.18197	1.12913	1.2701	1.20323	2.0394	1.33879	1.80157	1.24872	0.8752	1.3842	1.05427	1.60156	1.77166	1.12029	0.737525	0.804401	1.73679	1.23208	2.72995	2.83754	2.9584	2.72428	2.71573	1.38045	2.78052	1.64906	2.05582	2.42653	4.4323	3.17089	2.87376	2.93695	3.33828	3.5342	3.76755	4.14479	3.85591
965.91	5.06058	4.84277	4.75714	4.99853	4.80115	4.95386	4.6089	3.6071	4.89426	4.82487	1.06287	1.03587	1.16128	1.04642	1.23656	1.10653	1.98195	1.25165	1.77097	1.19742	0.857142	1.34409	0.935229	1.53335	1.74904	1.08585	0.684658	0.755226	1.65476	1.17465	2.62034	2.68716	2.99436	2.61557	2.66457	1.34345	2.67761	1.60041	2.06498	2.43072	4.44506	3.2947	3.14714	2.97364	3.67906	3.7762	3.77502	3.84613	3.7123
964.769	4.89182	4.89394	4.66336	4.9254	4.82126	4.95371	4.81805	3.61598	4.65855	4.73445	1.01699	0.986454	1.1865	1.00014	1.20387	1.09028	1.89203	1.19707	1.73047	1.20595	0.854724	1.22495	0.822764	1.50266	1.68587	1.18775	0.674834	0.745785	1.61993	1.10352	2.54372	2.59779	2.89026	2.49494	2.61828	1.35686	2.62337	1.55823	2.0581	2.40976	4.41646	3.56517	3.1496	3.13535	3.99505	3.98345	3.74562	3.93148	4.03686
963.626	4.61822	4.94307	4.45159	4.95065	4.91809	4.9666	4.68192	3.65133	4.46685	4.72819	0.99411	1.00343	1.23525	1.08189	1.24993	1.23574	1.90545	1.21717	1.73486	1.31219	0.838522	1.07264	0.849582	1.56842	1.74157	1.24474	0.735915	0.767486	1.67186	1.14157	2.51062	2.61703	2.84745	2.43937	2.58306	1.36963	2.59882	1.59407	2.02428	2.48952	4.25734	3.42103	3.51951	3.63195	4.0832	4.10088	4.00785	3.99518	4.02229
962.483	4.35507	4.84849	4.22618	5.06679	4.77494	4.73536	4.58054	4.02395	4.06727	4.68463	0.962997	0.979947	1.20458	1.10835	1.2606	1.28502	1.83146	1.21155	1.6725	1.33048	0.832472	0.948181	0.87959	1.53934	1.6864	1.27166	0.763919	0.740157	1.69039	1.11591	2.42866	2.59673	2.72855	2.36811	2.54106	1.33706	2.56947	1.61904	2.00083	2.5121	4.26076	3.34402	3.52843	3.79586	3.94522	3.77647	4.13754	4.102	3.80171
961.34	4.20825	4.59098	4.02566	4.97434	4.51885	4.6835	4.52457	3.91425	3.87441	4.35853	0.871032	0.99022	1.20608	1.07587	1.21206	1.34858	1.82834	1.2032	1.55027	1.29837	0.711908	0.904432	0.900482	1.54168	1.60299	1.23299	0.746478	0.711298	1.77128	1.04204	2.34817	2.57746	2.5096	2.27586	2.46646	1.31912	2.5109	1.59668	1.99397	2.49089	4.20821	3.04674	3.34013	3.82337	3.50882	3.4605	4.00602	3.91662	3.58726
960.196	3.69525	4.53846	3.82473	4.81715	4.18297	4.55402	4.34795	3.76896	3.90193	4.12312	0.738663	0.999963	1.25969	1.03193	1.18219	1.31413	1.79404	1.12878	1.47801	1.22245	0.570881	0.904033	0.894903	1.45435	1.4616	1.18458	0.73257	0.685692	1.79267	0.982971	2.20021	2.50587	2.32532	2.22682	2.27403	1.29662	2.37827	1.55588	1.92667	2.46421	4.40793	2.59958	3.22811	3.56628	3.3045	3.0768	3.60801	3.83334	3.2259
959.053	3.71194	4.40033	3.78374	4.50981	3.8783	4.29606	4.09044	3.49738	3.82267	3.9334	0.685309	1.00734	1.22819	1.00406	1.2095	1.24637	1.77601	1.12787	1.39724	1.21124	0.578131	1.01838	0.90836	1.40481	1.46838	1.16491	0.682693	0.713834	1.77165	0.989433	2.1229	2.46864	2.31718	2.21412	2.23587	1.24746	2.28959	1.54084	1.87827	2.46565	4.40526	2.8925	3.30769	3.47905	3.28273	3.08681	3.43565	3.8466	2.9136
957.909	3.72995	4.20393	3.62248	4.37091	3.76995	4.21265	3.97722	3.46722	3.91946	3.76869	0.678032	1.0149	1.25551	0.977063	1.25738	1.15472	1.76079	1.10171	1.36186	1.20551	0.594833	1.11798	0.919463	1.41751	1.51396	1.23215	0.698733	0.72967	1.84269	0.988328	2.07283	2.48109	2.3315	2.26816	2.14506	1.24468	2.24922	1.53979	1.82621	2.43218	3.91297	2.99595	2.92935	3.64336	3.07965	3.20327	2.95537	3.72816	2.72955
956.765	4.05588	4.18043	3.55694	4.43792	3.74287	4.13971	3.81689	3.69742	4.12809	3.7915	0.69532	1.08231	1.2596	1.04723	1.36869	1.17632	1.80322	1.14682	1.41736	1.23374	0.684438	1.1257	1.13883	1.51529	1.53306	1.30277	0.756931	0.816279	1.90638	1.06584	2.09247	2.53342	2.37137	2.26729	2.08511	1.23868	2.2895	1.54306	1.81602	2.49843	3.6236	3.14166	2.61984	3.41879	2.96881	3.12265	2.93331	3.62787	2.92835
955.62	3.61099	4.23131	3.43155	4.40573	3.49469	3.91496	3.79789	3.8388	3.88785	3.69057	0.813008	1.09666	1.24358	1.00991	1.4043	1.19171	1.80711	1.16748	1.41013	1.2074	0.737989	1.10232	1.23125	1.54642	1.60259	1.33516	0.794224	0.859603	1.9607	1.1107	2.08405	2.6011	2.30973	2.19779	2.0464	1.22975	2.32344	1.5147	1.84309	2.53548	3.40518	2.76994	2.3802	3.0026	2.65546	3.04178	2.80418	3.59655	3.17109
954.476	3.31722	3.99028	3.15403	4.11475	3.3411	3.85012	3.55195	3.69804	3.41753	3.19287	0.865905	1.07904	1.29228	0.991621	1.41639	1.18556	1.8185	1.16177	1.39369	1.25828	0.748649	1.05857	1.2148	1.6114	1.61016	1.32499	0.83487	0.841095	2.02099	1.09276	2.03331	2.61319	2.20541	2.08674	2.00759	1.24911	2.34484	1.45548	1.86222	2.55045	3.29776	2.15757	1.74876	2.52827	2.1424	3.06494	2.55314	3.15449	2.91879
953.331	3.12762	3.98863	3.13928	4.13302	3.22672	3.97566	3.55766	3.71687	3.28498	3.09621	0.925339	1.07159	1.45038	0.98254	1.45888	1.15702	1.78808	1.23792	1.46744	1.32299	0.719011	0.994373	1.1802	1.69798	1.5657	1.30425	0.83267	0.819754	2.029	1.08259	1.97268	2.59993	2.16118	2.13904	1.93849	1.2932	2.35302	1.44358	1.88766	2.5896	3.41901	1.74485	1.92849	2.26748	2.27368	2.64052	2.35205	3.12496	2.89487
952.186	3.1716	3.91724	3.11087	3.94597	3.02829	3.78319	3.41832	3.40832	2.89698	2.87247	0.939753	1.01317	1.5049	0.961146	1.45415	1.14242	1.77051	1.29163	1.4945	1.36264	0.733956	1.03941	1.14374	1.74294	1.5062	1.26749	0.804686	0.822974	2.00208	1.0441	1.9051	2.5528	2.05498	2.11803	1.95054	1.29296	2.35186	1.48584	1.87008	2.6551	3.3294	1.77746	2.06232	2.25245	2.12498	2.51623	2.40261	2.99229	3.02217
951.04	3.556	3.72817	2.9834	3.8929	2.89779	3.60829	3.36566	3.25193	2.89922	2.94123	0.979242	1.04319	1.58239	0.970423	1.41715	1.03772	1.75459	1.23793	1.52616	1.33055	0.708761	1.10505	1.19442	1.74253	1.44485	1.25305	0.788138	0.78539	1.97223	0.994581	1.77496	2.47914	1.95823	2.09706	1.89435	1.33786	2.29974	1.51787	1.85758	2.63072	3.02467	1.6714	1.95553	2.448	1.99314	2.39329	2.22725	2.52145	2.8149
949.895	3.80277	3.66974	2.85072	3.90753	2.68811	3.5462	3.4194	3.27599	2.95438	3.14013	0.932895	1.10207	1.59275	1.05874	1.45249	0.912393	1.82936	1.25215	1.56598	1.23777	0.69788	1.1409	1.28167	1.6643	1.30362	1.29957	0.811686	0.833637	1.96537	0.993913	1.58432	2.37154	1.83465	1.9731	1.81971	1.32834	2.26861	1.50616	1.86112	2.65532	3.04772	1.73559	1.80302	2.19644	1.92524	2.06642	1.99761	2.33811	2.87786
948.748	3.79311	3.72813	2.85565	3.948	2.70677	3.66853	3.58147	3.35758	2.95095	3.21721	1.05527	1.20962	1.62938	1.14723	1.52678	0.924756	1.91052	1.22743	1.58496	1.19941	0.689963	1.22465	1.39552	1.6299	1.37806	1.36189	0.880242	0.882058	2.00762	1.03873	1.4727	2.31902	1.65076	1.82052	1.74609	1.33281	2.23996	1.52274	1.9058	2.69639	2.90826	1.53552	1.57554	2.17775	1.82258	2.03354	2.02057	2.37118	2.67365
947.603	3.698	3.49442	2.58778	3.73452	2.70196	3.69207	3.44661	3.52703	2.74068	3.02527	1.09016	1.27065	1.67149	1.17959	1.65138	0.929696	1.90197	1.2424	1.64317	1.21171	0.643421	1.26375	1.33837	1.62549	1.39635	1.39934	0.938391	0.862304	2.04785	1.09275	1.39701	2.19046	1.44846	1.6614	1.62112	1.33519	2.19542	1.52573	1.90428	2.69674	2.97183	1.46416	1.0095	1.88857	1.6955	1.82244	1.91056	2.26722	2.05026
946.456	3.41554	3.29116	2.6026	3.66045	2.7716	3.72823	3.29799	3.62118	2.75963	2.93914	1.1558	1.30746	1.74795	1.15823	1.71567	0.972906	1.89013	1.22041	1.69053	1.16256	0.540113	1.23978	1.09167	1.64762	1.34066	1.37536	0.918372	0.744037	2.02103	1.08672	1.2727	2.05769	1.29861	1.50232	1.44893	1.33419	2.15388	1.49868	1.86565	2.67186	3.02605	1.08997	1.03307	1.72375	2.04079	1.74052	1.7281	2.73045	1.69037
945.309	3.04238	3.33667	2.6369	3.67745	2.85105	3.61279	3.266	3.44478	2.69349	2.72135	1.18915	1.30515	1.77166	1.14011	1.74822	0.956864	1.93572	1.1794	1.73145	1.19841	0.56613	1.32276	1.05239	1.68226	1.34821	1.37249	0.96811	0.737207	2.02269	1.10198	1.18596	1.96949	1.25063	1.32876	1.31513	1.34841	2.13609	1.57453	1.86576	2.67307	3.33904	0.976271	1.15604	1.59784	1.85476	1.63289	1.74526	2.865	1.80034
944.162	2.76981	3.33204	2.72677	3.7206	2.68343	3.37319	3.22744	3.33309	2.58553	2.88712	1.11133	1.31264	1.79307	1.10449	1.7132	0.844211	1.90084	1.10913	1.77914	1.13819	0.56781	1.37725	1.03142	1.67808	1.19901	1.3031	0.975338	0.672366	1.85941	1.10655	1.05585	1.83571	1.09784	1.17472	1.18777	1.36342	2.13603	1.55143	1.79535	2.6173	3.41445	0.93866	1.48656	1.64681	1.99876	1.73031	1.82485	2.84685	1.76956
943.015	2.21875	3.11787	2.71122	3.84141	2.3165	3.19585	3.12692	3.40454	2.37007	2.95969	1.03522	1.37269	1.83558	1.15959	1.75941	0.727929	1.91055	1.0837	1.85125	1.02923	0.558174	1.40803	0.976842	1.58882	1.07121	1.25722	1.01038	0.667129	1.81094	1.12462	0.92821	1.71931	0.994733	1.12226	1.14203	1.37985	2.14278	1.54134	1.7853	2.6601	3.38135	0.882665	1.63446	1.42315	1.79383	1.80344	1.56641	2.64748	1.73808
941.867	2.60444	3.12653	2.58142	3.97211	2.22614	3.30762	3.11467	3.61962	2.3146	2.97566	1.08982	1.49398	1.92674	1.27974	1.84054	0.693874	1.92889	1.0648	1.95376	0.9386	0.551199	1.54466	1.11083	1.54764	1.15172	1.31072	1.12001	0.715381	1.84763	1.18966	0.916685	1.71867	0.865412	1.1956	1.13264	1.44843	2.17796	1.58184	1.80186	2.73099	3.02099	1.10864	1.73778	1.6788	1.91055	1.94194	1.59567	2.18747	1.66139
940.719	2.92376	2.92804	2.43053	3.855	2.08676	3.38939	2.98479	3.92485	2.20354	2.7012	1.12958	1.57103	2.01861	1.3838	1.90518	0.705811	1.8524	1.11399	2.0676	0.892417	0.601757	1.50456	1.19334	1.57011	1.18261	1.35828	1.18587	0.772637	1.83041	1.24436	0.906086	1.69797	0.753294	1.28503	1.12957	1.5104	2.18019	1.59743	1.79881	2.76363	2.69247	1.29676	1.7975	1.65434	1.8566	1.87497	1.44803	1.89075	1.50713
939.57	2.50668	2.77178	2.2838	3.6854	1.96457	3.38046	2.87974	4.12255	2.14405	2.49715	1.28299	1.56411	2.04919	1.4297	1.96083	0.705257	1.7962	1.09681	2.06092	0.862717	0.543441	1.48147	1.11899	1.52069	1.03213	1.38762	1.23487	0.75154	1.79163	1.25994	0.789618	1.64039	0.691571	1.23612	1.0169	1.53572	2.1635	1.57303	1.77049	2.7501	2.37113	0.99337	1.60654	1.70219	1.98434	2.03592	1.52116	1.74637	1.47807
938.422	2.52556	2.88723	2.27608	3.67686	2.16904	3.29867	3.01726	4.24006	2.1378	2.43444	1.44978	1.55869	2.12693	1.49055	2.01024	0.628575	1.85947	1.07838	2.07609	0.919457	0.575768	1.47525	1.18775	1.57075	1.0476	1.40875	1.31177	0.844696	1.8367	1.30695	0.788624	1.65092	0.742426	1.25076	0.983662	1.5562	2.17388	1.62891	1.81473	2.72947	2.43228	0.969547	1.53889	1.5754	1.87972	2.04024	1.84056	1.6611	1.80623
937.273	3.0676	2.95812	2.36765	3.7451	2.3118	3.26764	3.01054	4.30535	1.93958	2.71596	1.52895	1.52293	2.11737	1.565	2.02963	0.541455	1.83541	1.10531	2.08144	0.973525	0.662944	1.49004	1.12794	1.57594	1.0117	1.38715	1.39097	0.883835	1.75247	1.36048	0.711943	1.5803	0.742691	1.24847	0.977554	1.57393	2.23279	1.60089	1.80055	2.6335	2.46683	0.965552	1.44337	1.85058	1.98713	1.81492	2.051	1.93111	1.89016
936.125	3.22758	3.01676	2.46519	3.75734	2.51191	3.30396	3.07302	4.38603	2.12325	2.91988	1.61852	1.56465	2.07714	1.6509	2.08349	0.550909	1.78771	1.11102	2.13661	0.941632	0.664082	1.51031	1.04566	1.4778	0.985637	1.31185	1.45968	0.930731	1.72114	1.39575	0.745915	1.56022	0.757863	1.24713	1.06203	1.63139	2.27404	1.63705	1.84919	2.58046	2.56763	0.894717	1.22706	1.60019	1.73563	1.89133	1.89491	2.00091	1.78637
934.976	3.4213	3.17727	2.38818	3.7832	2.81956	3.41844	3.26426	4.55713	2.3832	3.1981	1.63718	1.65389	2.14151	1.77713	2.09927	0.579394	1.74681	1.12901	2.19407	0.831069	0.666269	1.54562	1.08825	1.40605	1.03857	1.28056	1.55787	0.936678	1.71497	1.47645	0.781305	1.59472	0.714246	1.28682	1.18933	1.69303	2.32549	1.70418	1.87041	2.52185	2.62015	1.13073	1.31817	1.63735	1.86087	1.98568	1.49598	1.76497	1.87181
933.826	3.25475	3.40982	2.52856	3.76023	2.95429	3.73164	3.52092	4.77072	2.73502	3.31182	1.55419	1.70046	2.19871	1.87317	2.05546	0.589946	1.60738	1.13131	2.24503	0.773361	0.740869	1.5969	1.1952	1.41152	1.01063	1.2656	1.62792	0.954002	1.69631	1.51141	0.837452	1.66091	0.776171	1.31433	1.23471	1.73712	2.34896	1.74351	1.91137	2.485	2.76106	1.47866	1.5245	1.62187	1.93682	1.88234	1.06697	1.92382	1.62096
932.676	2.60873	3.37992	2.50493	3.66829	2.78492	3.8895	3.70891	5.07954	3.02559	3.45722	1.49864	1.67181	2.23377	1.90643	2.01622	0.563531	1.46697	1.04367	2.15641	0.696418	0.750123	1.57383	1.1573	1.37819	0.827293	1.34986	1.66011	0.941587	1.63604	1.52631	0.854562	1.65513	0.785635	1.35192	1.20109	1.72406	2.31237	1.75727	1.93989	2.41597	2.79092	1.74183	1.26845	1.59738	1.84446	1.85376	1.26773	1.95106	1.44658
931.526	2.35806	3.24624	2.59693	3.60192	2.62694	3.84856	3.78123	5.20844	2.98178	3.33666	1.49425	1.65071	2.26117	1.92584	2.01464	0.532314	1.49986	0.939615	2.09322	0.695517	0.736879	1.6282	1.12251	1.39866	0.743728	1.44301	1.70716	1.0115	1.67193	1.57773	0.968496	1.69931	0.864802	1.46429	1.23989	1.71486	2.28626	1.77705	1.9809	2.40779	2.72997	1.98807	1.13605	1.60737	1.92676	1.78816	1.68235	1.72478	1.526
930.376	2.506	2.95889	2.64342	3.52893	2.45577	3.78642	3.49914	5.20439	2.7579	3.27765	1.53072	1.62446	2.23458	1.91838	2.04674	0.567926	1.53616	0.931231	2.02137	0.794483	0.806241	1.76379	1.09284	1.43255	0.781201	1.54563	1.82381	1.11281	1.64315	1.62013	1.03388	1.74199	1.07396	1.53239	1.33095	1.74876	2.30618	1.76557	2.0198	2.43346	2.90949	1.87334	1.13549	2.04583	1.73151	1.46258	2.0007	1.82021	1.60849
929.226	2.57425	3.01052	2.5601	3.28506	2.4839	3.70557	3.19985	5.09594	2.38682	2.97294	1.54706	1.61076	2.10565	1.89392	1.99401	0.652849	1.5261	0.929771	1.98791	0.855185	0.863214	1.74693	1.21147	1.3653	0.829287	1.57373	1.9296	1.26717	1.63018	1.67071	1.15806	1.83621	1.25899	1.67336	1.43323	1.80879	2.33787	1.77388	2.04362	2.41866	3.19054	1.58454	1.24572	1.78459	1.87339	1.60422	1.94626	2.06771	1.50651
928.074	2.56352	3.05313	2.52957	3.40168	2.56975	3.49966	3.1197	5.06096	2.27928	3.00805	1.54287	1.62852	2.07182	1.86597	1.96267	0.779762	1.52347	0.970867	1.92284	0.89755	0.906258	1.66765	1.22631	1.35274	0.894228	1.54152	1.96944	1.313	1.62839	1.70283	1.25673	1.93108	1.41659	1.79149	1.59696	1.81949	2.4158	1.81672	2.01607	2.3546	3.18415	1.43819	1.37501	1.72486	2.05165	1.78385	1.85334	2.17109	1.89894
926.923	2.98669	3.26429	2.58985	3.51786	2.76291	3.5452	3.29828	5.00756	2.16735	3.07019	1.40905	1.53268	1.97513	1.73549	1.82499	0.762222	1.39305	0.948548	1.84443	0.878191	0.875898	1.65173	1.31147	1.27334	0.939745	1.45738	1.92435	1.29164	1.55259	1.70517	1.32008	1.99347	1.5596	1.85064	1.59075	1.7793	2.45354	1.78817	1.95445	2.27834	3.26664	1.42043	1.62018	1.6805	1.99322	1.92707	1.80457	2.24076	1.88573
925.771	3.38997	3.23178	2.54829	3.45443	2.74035	3.41671	3.21188	4.95653	2.53703	3.10418	1.3369	1.43186	1.84693	1.68579	1.71185	0.761761	1.24446	0.917146	1.74563	0.800785	0.847843	1.52137	1.20498	1.17371	0.834057	1.37658	1.79871	1.22307	1.41047	1.63206	1.27788	1.99558	1.62593	1.94199	1.55702	1.70228	2.38497	1.73137	1.86891	2.18892	2.71541	1.67841	1.72339	1.61763	1.79567	1.86167	1.83816	2.41206	1.76734
924.62	3.74576	3.16189	2.63567	3.42936	2.78725	3.37408	3.21007	4.72499	2.71772	3.09102	1.31993	1.35058	1.72657	1.63367	1.65612	0.721844	1.23484	0.851722	1.60384	0.814239	0.783125	1.40483	1.1908	1.10633	0.721112	1.31509	1.7105	1.19278	1.32498	1.63719	1.36106	1.95971	1.61059	1.97717	1.56953	1.62033	2.3024	1.65218	1.75858	2.11657	2.20406	2.04872	1.88271	1.82463	1.52055	1.81109	1.81941	2.46312	1.93281
923.468	4.57248	2.72638	2.46036	3.23075	2.58973	3.12054	3.01166	4.45836	2.75257	2.9459	1.27644	1.29232	1.71387	1.58422	1.6294	0.734863	1.26069	0.876017	1.47984	0.820801	0.75298	1.41304	1.178	1.08178	0.666146	1.24358	1.68691	1.16435	1.23028	1.52031	1.39428	1.91791	1.64884	1.92295	1.59919	1.5562	2.21019	1.58593	1.67402	2.01276	2.24528	2.24341	2.00917	1.94786	1.25098	1.82443	1.99901	2.48858	2.13312
922.316	4.00187	2.53595	2.15599	2.87956	2.33525	3.03253	2.80075	4.13199	2.34424	2.58402	1.20953	1.2186	1.59471	1.53049	1.47605	0.710006	1.14146	0.826784	1.3107	0.81886	0.751898	1.32795	1.25592	0.998155	0.633167	1.13012	1.6393	1.20772	1.14075	1.40887	1.42871	1.8231	1.58374	1.87624	1.57226	1.47871	2.04865	1.46273	1.59309	1.85682	2.37176	2.15422	1.70595	1.96458	1.506	1.7573	2.10085	2.33676	2.10873
921.163	3.21538	2.18623	1.82216	2.65466	1.87628	2.81613	2.73832	3.81872	1.91929	2.31373	1.17582	1.11182	1.44091	1.41506	1.34894	0.65545	1.00033	0.73182	1.10618	0.778858	0.73082	1.23104	1.14747	0.891327	0.562699	1.03076	1.51181	1.12941	1.04137	1.31622	1.43195	1.68141	1.41109	1.82268	1.56899	1.35015	1.8681	1.31494	1.46685	1.65468	2.48704	1.97317	1.45741	1.91592	1.6515	1.48326	2.14613	2.16962	2.04939
920.011	2.85258	2.36485	1.73066	2.50192	1.73643	2.71277	2.79062	3.59837	1.61282	2.29397	1.07536	0.960454	1.23963	1.23215	1.15669	0.640357	0.74818	0.606672	1.02036	0.696299	0.651771	1.05486	1.11152	0.770287	0.514187	0.911099	1.35764	1.0451	0.869682	1.2467	1.32949	1.54295	1.24909	1.71312	1.4946	1.18846	1.66642	1.14961	1.31888	1.4515	2.66405	1.75761	0.970071	1.91258	1.39426	1.50534	2.16352	1.73985	1.96601
918.857	2.61067	2.35039	1.59491	2.14989	1.53133	2.42857	2.50822	3.20424	1.66386	2.22098	1.00168	0.824603	1.05602	1.11295	1.04268	0.609034	0.592901	0.502807	0.990367	0.632611	0.647661	0.938163	1.04143	0.648418	0.437844	0.826562	1.19945	0.977512	0.66176	1.14769	1.18278	1.45729	1.18434	1.63266	1.36079	1.03317	1.4212	0.979449	1.19293	1.32432	2.73492	1.38762	1.02843	1.80843	1.50124	1.54429	1.89181	1.64445	1.71682
917.704	2.64361	2.3294	1.49337	1.94145	1.48174	2.17523	2.18837	2.98527	1.53469	2.04958	0.884547	0.667085	0.96168	0.975184	0.951655	0.501945	0.506926	0.378368	0.89864	0.545425	0.549414	0.728099	0.968687	0.583926	0.341335	0.729424	1.06769	0.892121	0.550476	1.09827	1.11241	1.35006	1.16678	1.54105	1.25786	0.881862	1.22498	0.832182	1.00592	1.17527	2.60876	1.26077	1.31109	1.89496	1.41381	1.71077	1.52996	1.57312	1.80692
916.551	2.90361	1.99274	1.32144	1.86186	1.33331	1.89983	1.84506	2.78001	1.37919	1.81162	0.682564	0.597039	0.825026	0.863295	0.842698	0.438552	0.506639	0.315798	0.814769	0.440264	0.513888	0.705499	0.821957	0.539019	0.217261	0.624843	0.937039	0.79541	0.469409	0.901216	1.02039	1.23501	1.14748	1.46681	1.17235	0.709525	1.11361	0.739489	0.838807	0.986819	2.46162	1.34942	1.73609	1.789	1.15037	1.7771	1.41929	1.33776	1.62296
915.397	1.82203	1.64162	1.145	1.65936	1.21522	1.73472	1.59483	2.52397	1.35223	1.40472	0.602924	0.514318	0.749344	0.784708	0.731643	0.405848	0.431661	0.293796	0.730281	0.401511	0.476441	0.764959	0.894348	0.441344	0.196636	0.517572	0.817413	0.798207	0.398182	0.766744	1.05047	1.14526	1.2055	1.37089	1.11818	0.545336	0.991539	0.677806	0.726662	0.877083	2.16683	1.20566	1.77131	1.83493	0.808822	1.89273	1.43639	1.15275	1.50574
914.243	1.11	1.31123	1.03353	1.5222	1.03309	1.64837	1.49793	2.24819	1.23502	1.20179	0.572537	0.464992	0.611899	0.720029	0.573292	0.341692	0.344067	0.296734	0.610092	0.372465	0.479603	0.766228	0.877544	0.291939	0.112201	0.426634	0.67277	0.710386	0.343794	0.687402	1.09104	1.07479	1.18903	1.30135	1.1657	0.40479	0.884918	0.574826	0.621106	0.744731	1.83081	1.31537	1.75681	1.62608	0.673386	1.87288	1.28402	1.2107	1.21917
913.089	0.648667	1.57773	0.882206	1.44148	0.979703	1.45961	1.57223	1.94174	1.1962	1.23469	0.482787	0.397086	0.4563	0.608701	0.432736	0.42981	0.174165	0.303244	0.524539	0.30651	0.49431	0.625596	0.907529	0.237087	0.109418	0.344814	0.559179	0.640746	0.319279	0.653892	1.13192	1.04371	1.13633	1.21212	1.19518	0.295408	0.79153	0.501539	0.53975	0.649716	1.21253	1.51962	1.18652	1.24137	0.351945	1.77029	1.43489	1.12549	1.2259
911.934	0.518245	1.55225	0.885201	1.30661	1.0556	1.52929	1.78931	1.6865	1.18301	1.32728	0.39393	0.326131	0.342286	0.577641	0.406334	0.48801	0.131355	0.190598	0.446605	0.339383	0.547249	0.580885	1.06278	0.168988	0.168599	0.295812	0.437085	0.553884	0.268789	0.531589	1.21446	1.08437	1.14036	1.20632	1.21094	0.219805	0.656331	0.400942	0.505967	0.601735	1.14506	1.25423	0.860762	1.03542	0.749091	1.7356	1.65332	1.23075	1.13397
910.779	1.15905	1.31783	0.762775	1.19194	0.973964	1.34419	1.73811	1.67153	0.905062	1.14433	0.275495	0.213378	0.247061	0.461727	0.379469	0.493244	0.0648466	0.115455	0.349578	0.307637	0.457661	0.360584	1.01303	0.154034	0.212228	0.214283	0.312349	0.430179	0.183045	0.440775	1.20464	1.06142	1.2062	1.23434	1.21385	0.189208	0.547797	0.271066	0.437788	0.525834	0.878174	1.07655	0.24238	0.876849	1.19733	1.55854	1.64026	1.03745	1.32723
909.624	1.87884	0.922504	0.818835	1.17747	1.06211	1.24655	1.56258	1.65527	0.845425	0.996908	0.13735	0.11877	0.150438	0.281694	0.288629	0.44378	0.0481724	0.0446117	0.253213	0.311697	0.357844	0.243146	0.876707	0.153394	0.207403	0.116356	0.16454	0.290786	0.1495	0.26892	1.13523	1.00732	1.05239	1.31016	1.15024	0.100062	0.401794	0.152849	0.336945	0.448995	0.535698	0.831676	0.369976	0.827136	1.12743	0.892672	1.50521	0.856391	0.938485
908.469	1.92124	0.378856	0.816005	0.965045	0.902649	1.01477	1.17113	1.42211	0.883888	0.625355	0.095537	0.0625038	0.152994	0.164001	0.259627	0.39405	0.0423166	0.0537782	0.196453	0.342057	0.252404	0.176176	0.795076	0.15052	0.183563	0.0936515	0.0785294	0.24919	0.0995965	0.143967	1.07506	0.930857	1.08562	1.29824	1.15887	0.0570649	0.282971	0.102286	0.262231	0.366901	0.722732	0.634619	0.718031	0.680455	1.01978	0.839268	1.34372	0.679719	0.532373
907.312	1.49316	0.0940777	1.05683	0.892164	0.7445	0.921785	0.998427	1.12806	0.796623	0.506698	0.110169	0.0953003	0.113638	0.0953127	0.253123	0.386974	0.0731629	0.174774	0.145139	0.367787	0.244165	0.188136	0.651698	0.121351	0.19971	0.0781692	0.0545414	0.258561	0.131563	0.110006	1.03463	0.900729	1.16691	1.29072	1.26107	0.0349107	0.240294	0.0592267	0.238196	0.308074	0.921244	0.814442	0.881103	0.822578	0.881686	0.915422	0.910907	0.713118	0.753889
906.156	0.822677	0.131119	0.706767	0.711017	0.556466	0.524595	0.691853	0.719535	0.634559	0.294985	0.0643188	0.0909983	0.08709	0.0882423	0.260048	0.443434	0.152575	0.301052	0.111386	0.336706	0.303117	0.212644	0.638211	0.138507	0.264518	0.103937	0.0819289	0.286876	0.192525	0.181431	1.01284	0.796756	1.13677	1.19375	1.27059	0.0427928	0.246772	0.101697	0.201145	0.253296	0.877042	1.16495	1.15047	0.894453	0.763813	0.943535	0.639802	0.808067	1.06045
905	0.312678	0.544683	0.683202	0.6179	0.422346	0.466016	0.59762	0.515528	0.54053	0.368564	0.0730799	0.105182	0.135878	0.151964	0.30636	0.431614	0.253308	0.301822	0.117425	0.288744	0.325923	0.291193	0.720481	0.122476	0.278958	0.0973126	0.111885	0.238277	0.244897	0.137346	0.966217	0.750015	1.12858	1.12977	1.15667	0.0435084	0.206853	0.104871	0.188909	0.214617	0.968323	1.46382	0.893036	1.03597	0.792531	0.790002	0.542738	0.651281	1.10271
903.844	0.232289	0.431734	0.563428	0.536664	0.24269	0.266243	0.516091	0.380973	0.216215	0.350615	0.0917849	0.0730368	0.11569	0.118201	0.345551	0.366909	0.290037	0.311648	0.121624	0.200437	0.29186	0.214086	0.632867	0.143876	0.318571	0.0518083	0.113266	0.173636	0.260752	0.119115	0.84734	0.6292	1.02234	1.03237	0.988038	0.0646829	0.178625	0.0717225	0.149524	0.184807	0.937158	1.47533	0.398532	0.96637	0.882767	0.682601	0.532933	0.443046	1.01813
902.687	0.501776	0.32302	0.410776	0.52291	0.289937	0.106836	0.386288	0.167286	0.140446	0.371152	0.168589	0.0379166	0.13142	0.0893506	0.248903	0.256949	0.320651	0.286708	0.115506	0.144971	0.178573	0.167967	0.468626	0.149864	0.27817	0.0324786	0.081303	0.0703124	0.383972	0.0820043	0.669911	0.479236	0.710661	0.919632	0.728085	0.0321761	0.0636191	0.0629006	0.0717672	0.126748	0.510159	1.1566	0.439286	0.675786	0.522399	0.344959	0.365322	0.275645	0.495412
901.53	0.52728	0.300472	0.375507	0.439965	0.0884245	0.249219	0.396984	0.0946766	0.0862344	0.35739	0.161453	0.0540757	0.137229	0.104421	0.268814	0.183469	0.28946	0.264937	0.079525	0.130643	0.12131	0.109407	0.276596	0.264364	0.273772	0.0747637	0.0548031	0.0291048	0.395453	0.069398	0.49908	0.293954	0.561865	0.749374	0.537097	0.0340646	0.0126609	0.050549	0.0361379	0.0641247	0.220769	0.909341	0.463288	0.281639	0.45949	0.386219	0.139602	0	0.10158
900.372	0.18049	0.361325	0.439915	0.425632	0.06694	0.230516	0.414892	0.292637	0.0712331	0.380308	0.208461	0.123693	0.139601	0.150507	0.318169	0.118085	0.298837	0.305529	0.163126	0.202398	0.1692	0.0951503	0.170536	0.299227	0.367475	0.125575	0.0957236	0.0983673	0.43693	0.0939354	0.366724	0.211146	0.536812	0.625488	0.461727	0.052239	0.0238891	0.0377187	0.0871064	0.06049	0.11614	0.679471	0.661961	0.290875	0.247173	0.598596	0.0748544	0.0893781	0.350114
899.215	0.698207	0.357003	0.349498	0.449288	0.251234	0.190085	0.280019	0.458148	0.0695979	0.358797	0.282707	0.202771	0.229536	0.250811	0.416414	0.175184	0.421708	0.329405	0.282085	0.317071	0.233984	0.246824	0.262623	0.38326	0.428788	0.164922	0.217796	0.152955	0.444584	0.154549	0.254563	0.100535	0.465995	0.457954	0.382467	0.136823	0.0990235	0.119163	0.109863	0.130631	0.0885236	0.642169	0.964313	0.328131	0.550509	0.581109	0.324769	0.568032	0.528406
898.057	1.42867	0.746084	0.286984	0.332059	0.233498	0.198741	0.281487	0.655809	0.129636	0.321459	0.334833	0.331113	0.467554	0.283735	0.546226	0.11609	0.555117	0.346559	0.386265	0.354071	0.247402	0.431867	0.38574	0.402744	0.457266	0.210381	0.288288	0.163367	0.455529	0.158661	0.127396	0.0770875	0.360767	0.284479	0.205928	0.213433	0.136352	0.161552	0.139763	0.219796	0.244564	0.832538	0.706563	0.341937	0.755223	0.231558	0.773463	0.686566	0.576065
896.898	1.56885	0.532845	0.228826	0.15948	0.30579	0.171608	0.219475	0.596165	0.0300504	0.220958	0.415368	0.44323	0.618009	0.321843	0.686748	0.110938	0.660079	0.38609	0.465865	0.345436	0.24292	0.509148	0.418268	0.433439	0.47642	0.217263	0.367201	0.197114	0.50917	0.172822	0.07168	0.0553358	0.190241	0.160057	0.133555	0.325913	0.178014	0.231771	0.155147	0.318345	0.388276	0.730964	0.719203	0.416136	0.910737	0.123533	0.941178	0.79516	0.556297
895.74	1.40748	0.335395	0.123306	0.0835367	0.314445	0.0897318	0.0701995	0.205792	0.165517	0.0946629	0.607682	0.573326	0.775214	0.451681	0.757235	0.161284	0.742162	0.503939	0.519914	0.367725	0.193522	0.699807	0.425276	0.37638	0.386369	0.292256	0.447559	0.237854	0.616295	0.253283	0.0318215	0.027469	0.0876448	0.0824703	0.0505213	0.427062	0.244893	0.351799	0.185136	0.354291	0.334624	0.425347	0.819234	0.134207	0.85119	0.265381	0.892249	0.79094	0.661662
894.581	1.07545	0.257662	0.201642	0.0691319	0.350202	0.402793	0.193903	0.0528171	0.273678	0.194356	0.804304	0.741167	0.901004	0.628746	0.924577	0.26196	0.790056	0.710498	0.537508	0.447199	0.302516	0.80936	0.499494	0.464672	0.505369	0.425357	0.521667	0.368381	0.700841	0.407184	0.019486	0.0138297	0.0397463	0.0201604	0.0461203	0.55039	0.320537	0.46535	0.309662	0.406764	0.141313	0.556856	0.56535	0.163565	0.927439	0.493687	0.412441	0.466475	0.666514
893.423	0.183985	0.280361	0.405297	0.150021	0.505548	0.421761	0.233528	0.346979	0.479784	0.34442	0.964756	0.864019	0.968919	0.768568	1.03447	0.337797	0.848415	0.864516	0.65149	0.566298	0.452465	0.834346	0.503878	0.511635	0.659528	0.548611	0.662845	0.476307	0.833924	0.527706	0.0240935	0.0833628	0.107729	0.0964525	0.143945	0.681492	0.385538	0.552599	0.458702	0.455138	0.280857	0.421306	0.838342	0.284947	0.724628	0.933209	0.378472	0.302113	0.720429
892.264	0.38682	0.223523	0.608142	0.309324	0.776999	0.390473	0.338556	0.605263	0.509011	0.481495	1.14153	0.953559	1.06755	0.914914	1.23254	0.576189	1.00974	0.949807	0.80832	0.731738	0.5651	0.922359	0.655249	0.64364	0.843784	0.678258	0.835992	0.561889	0.878212	0.591248	0.120664	0.153282	0.174256	0.158259	0.225886	0.8313	0.496148	0.677438	0.603666	0.606713	0.32674	0.319851	0.693509	0.663142	1.10301	1.00062	0.481333	0.626067	0.793593
891.104	0.824259	0.299995	0.537353	0.423778	0.638961	0.355537	0.578801	0.842661	0.376199	0.559519	1.18864	1.15867	1.29296	1.01237	1.38129	0.751711	1.22558	1.04131	0.983739	0.906814	0.718487	1.01838	0.840866	0.874189	1.06452	0.829438	0.945509	0.626663	0.998	0.691874	0.185997	0.280437	0.266166	0.281196	0.260745	0.981116	0.602194	0.83153	0.732453	0.753885	0.714703	0.269073	0.750048	0.741074	0.927322	1.01197	0.788542	0.723345	1.00796
889.943	0.726425	0.318601	0.488641	0.602126	0.554996	0.229127	0.594487	0.848936	0.197118	0.520821	1.32672	1.32187	1.46547	1.19781	1.53339	1.001	1.42783	1.19744	1.16465	1.08729	0.901406	1.04441	0.988081	1.15676	1.34659	0.930572	1.0905	0.751454	1.14861	0.822958	0.347345	0.371479	0.380791	0.48931	0.375599	1.13485	0.734442	0.973168	0.863453	0.908873	0.897148	0.365393	1.28484	1.02504	0.958334	0.981717	1.24576	0.789344	1.13112
888.783	1.0089	0.48718	0.437951	0.728514	0.253763	0.127263	0.535734	0.632497	0.210392	0.517535	1.55547	1.4848	1.73646	1.42295	1.71808	1.17749	1.5653	1.36171	1.29993	1.33566	1.06241	1.27298	1.20216	1.31897	1.53866	1.07579	1.2121	0.889974	1.38863	1.06323	0.490387	0.467143	0.60048	0.63118	0.46832	1.28983	0.901225	1.14089	0.994506	1.06983	1.05968	0.359553	1.57534	1.13468	0.982575	0.973156	1.79244	0.74274	1.50239
887.623	1.59945	0.503048	0.571068	0.88532	0.376092	0.374902	0.60477	0.432497	0.301072	0.68651	1.75249	1.67682	1.91196	1.65332	1.93209	1.26141	1.69986	1.53743	1.38115	1.55904	1.33463	1.47155	1.38594	1.52484	1.70268	1.30811	1.36155	1.09077	1.68892	1.2733	0.59177	0.573365	0.716066	0.707715	0.609237	1.43119	1.04353	1.34476	1.19102	1.20259	1.06156	0.779922	1.50656	1.37678	1.21346	0.822672	1.63234	0.715892	1.55971
886.463	1.51869	0.572706	0.644102	0.939349	0.48343	0.628626	0.83574	0.412808	0.33776	0.533265	1.95174	1.81412	2.23073	1.80203	2.11209	1.36847	1.84882	1.71729	1.47409	1.7987	1.56034	1.54792	1.53632	1.61244	1.86769	1.52571	1.54046	1.34937	1.99696	1.50259	0.732793	0.746626	0.911704	0.762368	0.757041	1.56043	1.16867	1.52558	1.40792	1.36526	1.27455	0.997547	1.49291	1.47401	1.32019	0.894131	1.70517	0.592798	1.68235
885.302	1.54376	0.685884	0.75083	0.863597	0.586096	0.620804	0.973765	0.58217	0.565386	0.466159	2.0484	1.87594	2.48323	1.94075	2.35951	1.56804	2.03891	1.87483	1.55282	2.0035	1.7414	1.64851	1.67423	1.72396	2.03767	1.79634	1.69273	1.6228	2.22515	1.62972	0.910172	0.931795	0.987937	0.742055	0.835154	1.70792	1.33648	1.72867	1.66488	1.5716	1.51491	1.06678	1.01377	1.21276	1.772	0.850615	1.42286	0.952538	1.78242
884.141	1.6179	0.47663	0.7483	0.722062	0.525566	0.632501	0.954053	0.7281	0.456574	0.368106	2.14046	1.91266	2.69928	2.03724	2.57679	1.78956	2.23378	2.04119	1.66666	2.24732	1.87848	1.8251	1.80059	1.97305	2.19854	2.09742	1.92135	1.93025	2.51345	1.82642	0.969793	1.10193	1.02839	0.8561	0.908856	1.87229	1.53271	1.97058	1.87981	1.82562	1.79416	1.06736	1.00155	0.65726	1.56639	1.0929	1.24906	0.821642	1.7836
882.979	0.992926	0.292198	0.808493	0.792673	0.488523	0.561643	0.988445	0.755797	0.514445	0.356225	2.34299	1.87015	2.85076	2.18798	2.84889	2.01217	2.49525	2.23556	1.765	2.51343	1.94692	1.97578	1.97076	2.24128	2.46129	2.44275	2.2465	2.30346	2.79432	2.12864	1.10059	1.2367	1.00771	1.00311	0.995593	2.0807	1.76187	2.18944	2.09118	2.08291	1.7627	0.873499	1.21689	0.622081	1.34594	1.57012	1.385	0.969556	1.67499
881.817	1.04022	0.380878	0.668802	0.747845	0.230799	0.464897	0.930684	0.792769	0.439769	0.591599	2.59652	1.8606	3.0537	2.35735	3.19643	2.24676	2.78353	2.46475	1.87815	2.82192	2.05739	2.22143	2.22994	2.54932	2.77182	2.92981	2.62343	2.69724	3.22084	2.6119	1.23058	1.42451	1.06062	1.15989	1.1554	2.36906	2.03811	2.49778	2.35448	2.38447	1.87408	0.494176	1.40123	0.862276	1.07698	1.63135	1.54955	1.11748	2.00621
880.655	1.22762	0.356557	0.654469	0.720133	0.441458	0.441531	0.598316	0.655273	0.452459	0.731595	2.81875	1.93	3.15531	2.59186	3.56104	2.46784	3.10117	2.72037	2.02865	3.17715	2.33318	2.58726	2.51813	2.91047	3.11918	3.48979	3.15072	3.15025	3.7086	3.06528	1.36079	1.5732	1.17148	1.28464	1.34911	2.7309	2.29961	2.88477	2.6737	2.6273	1.57824	0.631055	1.55387	1.58322	1.23212	1.914	1.19762	1.59014	2.13433
879.493	0.742347	0.465208	0.341091	0.574861	0.468517	0.483048	0.630324	0.567858	0.263602	0.542413	3.17549	2.0478	3.51705	2.87692	3.82498	2.73288	3.47543	2.97097	2.18617	3.51167	2.61433	2.80835	2.7734	3.11778	3.44654	4.0677	3.69387	3.67604	4.22139	3.57329	1.51397	1.75146	1.2983	1.31773	1.48051	3.10499	2.61123	3.23482	3.01505	2.88971	1.70997	1.04379	1.70469	1.99694	1.47833	1.93855	1.4933	1.49931	2.13185
878.33	0.391365	0.697027	0.281991	0.744852	0.437778	0.629379	0.832694	0.690263	0.399185	0.510106	3.44077	2.23249	3.87923	3.24249	4.17248	3.04544	3.87779	3.22938	2.34443	3.81912	2.97115	3.09929	3.02467	3.37082	3.82499	4.65462	4.25448	4.13793	4.70829	4.01929	1.65697	1.88699	1.44662	1.35146	1.54746	3.52628	2.93497	3.59465	3.41692	3.15045	1.7874	1.44476	1.51075	1.86068	1.99813	2.05908	1.83311	1.55043	2.11246
877.167	0.487393	0.830015	0.394005	0.781844	0.438704	0.676918	0.998111	0.588785	0.395165	0.491963	3.66083	2.28134	4.18402	3.51257	4.44521	3.30245	4.12226	3.43438	2.51348	4.09582	3.19629	3.2458	3.12565	3.50508	3.94122	5.15518	4.74061	4.51756	4.98708	4.33769	1.69273	1.93895	1.47695	1.39873	1.54877	3.86169	3.17993	3.84353	3.70488	3.33716	1.7765	2.0347	1.70071	1.73135	2.2415	2.12872	2.02673	1.22427	1.87387
876.004	0.520526	0.68291	0.608486	0.929331	0.482735	0.668058	1.28861	0.622296	0.633756	0.565552	3.82161	2.30831	4.37904	3.68621	4.64008	3.35429	4.25464	3.49987	2.56707	4.23575	3.21233	3.24994	3.12413	3.61386	4.02197	5.44501	5.14388	4.80265	5.07344	4.57506	1.7014	1.9689	1.38117	1.4159	1.49451	4.13779	3.28402	4.02463	3.85471	3.41227	1.61806	2.13363	1.59327	1.82775	2.17404	2.15866	2.00943	1.20155	1.67518
874.841	1.19744	0.600837	0.570063	0.916459	0.370134	0.616958	1.3236	0.709726	0.717239	0.737468	3.90635	2.31537	4.46526	3.78722	4.80382	3.36245	4.22811	3.58932	2.64663	4.23249	3.21233	3.18688	3.09229	3.6738	4.03065	5.56524	5.31411	4.96253	5.0231	4.70322	1.64088	1.95046	1.32746	1.38546	1.43087	4.25322	3.25981	4.12108	3.90802	3.44292	1.63191	1.92217	1.45728	2.01913	1.79613	2.10887	1.7815	1.076	1.90791
873.677	1.51706	0.368979	0.505057	0.807297	0.454282	0.416892	0.865102	0.570508	0.867201	0.559217	3.9179	2.33339	4.44492	3.84303	4.82219	3.30905	4.11335	3.63124	2.72174	4.14056	3.22846	3.30014	3.19853	3.75978	4.02348	5.50296	5.39052	4.98074	4.90412	4.76407	1.51348	1.86214	1.3	1.30911	1.39678	4.27965	3.12356	4.15076	3.84294	3.45221	1.50112	1.86362	1.68377	2.14232	1.71259	2.37671	1.51949	1.324	2.04535
872.513	1.53931	0.380047	0.237627	0.663914	0.416112	0.347142	0.724895	0.465164	0.78178	0.291014	3.89793	2.29708	4.43783	3.89263	4.75666	3.17684	3.93896	3.53735	2.80428	3.96336	3.11652	3.4389	3.17299	3.72798	4.00244	5.30809	5.28339	4.89738	4.70397	4.75292	1.37514	1.78878	1.23215	1.187	1.27712	4.16958	2.94081	4.03885	3.68617	3.38935	1.64843	1.65314	1.90479	1.68084	1.76855	2.44458	1.66212	1.39651	2.09306
871.349	1.53101	0.516172	0.237031	0.717451	0.440639	0.475159	0.602508	0.394445	0.65944	0.185339	3.78138	2.31697	4.37762	3.95172	4.73507	3.04768	3.85267	3.43045	2.85155	3.785	3.02903	3.59469	3.21987	3.6621	3.96965	5.01825	5.10559	4.67628	4.4509	4.69902	1.29253	1.60505	1.10954	1.00449	1.1699	3.97902	2.76825	3.8787	3.49867	3.28752	1.79088	1.577	2.00116	1.40707	2.01135	2.8063	2.1155	1.56602	2.24547
870.185	1.70005	0.768105	0.47389	0.582186	0.427513	0.435244	0.748438	0.227019	0.573807	0.158454	3.67167	2.28193	4.26507	3.87243	4.58355	2.80619	3.68488	3.28341	2.89815	3.55535	2.85762	3.56956	3.11666	3.48577	3.75441	4.66546	4.76907	4.3349	4.0536	4.45224	1.18219	1.38435	0.999324	0.884798	1.02751	3.73453	2.57541	3.59856	3.27954	3.07583	1.88479	1.53035	2.26926	1.10333	2.24987	2.76619	2.46095	1.74029	2.1388
869.02	1.64873	0.75561	0.628517	0.649277	0.494609	0.362048	0.921196	0.249736	0.500293	0.365348	3.48204	2.25567	3.98256	3.65399	4.38782	2.49024	3.47549	3.03428	2.78992	3.24511	2.54356	3.48785	2.81062	3.29404	3.50605	4.21042	4.45758	3.96764	3.58421	4.10316	1.03115	1.19588	0.772693	0.77877	0.883719	3.47063	2.32922	3.28406	2.95788	2.81302	1.68626	1.434	2.0052	1.23972	2.25735	2.3818	2.44977	1.69962	1.84163
867.854	1.72344	0.671809	0.734444	0.709544	0.543839	0.342086	0.815388	0.267506	0.635632	0.564589	3.21079	2.15084	3.67586	3.47073	4.15914	2.19143	3.19782	2.8121	2.66323	2.89207	2.28046	3.2702	2.50733	3.02624	3.24339	3.78292	4.08905	3.63867	3.14511	3.73458	0.862141	1.01173	0.727409	0.64132	0.776638	3.15099	2.07939	2.97183	2.67775	2.52552	1.60814	1.23969	1.79061	1.63048	1.84851	2.11027	2.30042	1.59245	1.68876
866.688	1.58203	0.267036	0.618583	0.529087	0.430785	0.277712	0.568822	0.195089	0.742339	0.415777	2.9461	2.04019	3.39048	3.31072	3.88381	1.90507	2.94589	2.64996	2.52472	2.60053	2.04977	2.98095	2.34533	2.88838	2.97058	3.44538	3.73049	3.3354	2.81182	3.34823	0.756027	0.873546	0.650992	0.550608	0.727676	2.87357	1.84043	2.70078	2.43156	2.33706	1.52556	1.2121	1.90852	1.5669	1.59898	1.73136	2.18821	1.4219	1.42875
865.523	1.24547	0.168213	0.420289	0.533877	0.330464	0.265159	0.392351	0.145782	0.790336	0.447255	2.60643	1.83581	3.16364	3.13927	3.5853	1.67068	2.54674	2.41386	2.38989	2.34198	1.79083	2.75581	2.06057	2.68459	2.64722	3.08916	3.32959	2.98983	2.48891	2.99695	0.677137	0.783109	0.586499	0.436996	0.665495	2.58344	1.55603	2.41911	2.21043	2.1145	1.44568	1.09269	1.64349	1.36141	1.4021	1.6317	1.92788	1.05656	1.40528
864.357	0.692992	0.197841	0.376917	0.296159	0.201269	0.247026	0.13394	0.178759	0.41778	0.222809	2.23374	1.61793	2.88316	2.91137	3.27633	1.41858	2.29241	2.18135	2.178	2.10107	1.58361	2.49937	1.86004	2.39056	2.31954	2.68828	2.91784	2.6012	2.17205	2.74423	0.64841	0.630563	0.43779	0.3164	0.621225	2.24964	1.34596	2.11718	1.96548	1.9026	1.58184	1.22095	1.65768	1.38407	1.48557	1.81739	1.86453	0.7936	1.54706
863.191	0.552477	0.275259	0.436916	0.00863798	0.0488141	0.327149	0.190253	0.257343	0.279462	0.086972	1.98994	1.43188	2.64734	2.62239	2.91554	1.249	2.10685	1.96916	2.03894	1.90323	1.41291	2.33616	1.66977	2.18202	2.11921	2.33136	2.46089	2.21719	1.94507	2.45039	0.683362	0.557007	0.363546	0.402484	0.58623	1.96358	1.1855	1.86396	1.74128	1.69913	1.71166	0.895932	1.70975	1.17502	1.60117	1.82897	1.87312	0.758102	1.63315
862.024	0.640149	0.50166	0.566246	0.22236	0.201893	0.340134	0.453433	0.321097	0.225089	0.351619	1.78615	1.25866	2.3384	2.276	2.56648	1.10231	1.87308	1.70203	1.85336	1.63912	1.22405	2.14706	1.48219	1.82302	1.80516	1.91047	2.10492	1.90528	1.67593	2.13669	0.655857	0.546057	0.306244	0.43521	0.497784	1.63823	1.0374	1.60577	1.45662	1.48485	1.68946	0.780629	1.248	1.31669	1.77357	1.52606	1.35272	0.676362	1.50578
860.857	0.657548	0.678674	0.752818	0.548431	0.41167	0.411712	0.427432	0.393607	0.236132	0.351219	1.5665	1.13353	2.0182	1.99913	2.27039	0.991353	1.69561	1.41272	1.72928	1.43919	0.99886	1.94294	1.29278	1.53488	1.55928	1.59286	1.77091	1.65554	1.48687	1.83264	0.644145	0.523527	0.456024	0.464901	0.445982	1.34698	0.924813	1.41626	1.257	1.27485	1.69161	0.62634	1.15956	1.21295	1.94279	1.4116	1.19109	1.02953	1.39045
859.69	0.917329	0.587511	0.797953	0.596244	0.505844	0.462001	0.476965	0.524053	0.222623	0.401847	1.36669	1.09154	1.7387	1.78181	2.06409	0.929181	1.53679	1.28939	1.65407	1.32777	0.899616	1.63526	1.28653	1.38336	1.35878	1.40693	1.50327	1.45106	1.34012	1.54058	0.738116	0.49324	0.493667	0.498011	0.411072	1.14355	0.824766	1.24037	1.07964	1.18494	1.38459	1.18382	1.14381	1.21438	1.84389	1.25016	1.03761	1.10714	1.06037
858.523	1.22351	0.594261	0.680469	0.775941	0.576319	0.40008	0.58482	0.40344	0.40479	0.55247	1.13898	0.982239	1.55855	1.55867	1.85119	0.84035	1.26889	1.16845	1.5212	1.1574	0.790389	1.45363	1.14488	1.21524	1.13777	1.2576	1.27338	1.22804	1.19723	1.30887	0.712797	0.507935	0.589609	0.499944	0.443499	0.989819	0.677187	1.0507	0.98496	1.1061	0.946849	1.49455	0.96884	1.09476	1.70296	0.910402	1.36842	1.02842	1.32698
857.355	1.08963	0.486254	0.411724	0.617325	0.419984	0.320956	0.486603	0.384974	0.353779	0.30437	0.976095	0.941729	1.3913	1.42064	1.72527	0.77528	1.15168	1.11925	1.36529	1.01745	0.722168	1.25034	0.999751	1.07596	1.07384	1.14753	1.08557	1.0497	0.997334	1.19342	0.700332	0.522454	0.673105	0.524029	0.5364	0.863611	0.585531	0.883615	0.955017	1.05851	0.85284	2.10515	1.05055	1.16563	1.89407	0.974062	1.72727	1.2317	1.42617
856.188	0.932018	0.54785	0.227143	0.454565	0.280519	0.317139	0.517688	0.342628	0.403248	0.212332	0.906082	0.840103	1.27623	1.28138	1.54668	0.751129	1.1067	1.11191	1.24647	0.882556	0.672825	1.2142	0.860506	1.03239	1.0019	1.07416	0.908042	0.955979	0.8798	1.08999	0.689749	0.524386	0.615692	0.579312	0.627166	0.763004	0.503875	0.782902	0.896884	0.957944	1.01945	2.03641	1.09276	1.44168	1.83049	0.699178	1.70798	1.27573	1.4037
855.02	0.770226	0.656507	0.422802	0.545113	0.463891	0.395478	0.661193	0.497835	0.697999	0.583983	0.865112	0.761553	1.17819	1.16409	1.3997	0.624832	1.01837	1.00365	1.16357	0.768261	0.629117	1.11752	0.776027	0.939685	0.896976	0.947504	0.813032	0.928734	0.751604	1.01109	0.635414	0.509701	0.588329	0.515182	0.607313	0.640891	0.438054	0.696157	0.861141	0.847881	1.23015	1.83283	0.891868	1.91229	1.79584	0.672678	1.5126	1.13448	1.46197
853.852	0.921315	0.678575	0.607858	0.56579	0.668564	0.474274	0.811926	0.736821	0.880935	0.631823	0.884385	0.684883	1.04907	1.10138	1.30271	0.517532	0.948254	0.819439	1.12682	0.732287	0.44399	1.00294	0.63968	0.884455	0.799575	0.803466	0.711525	0.824329	0.665073	0.884412	0.591323	0.462336	0.542789	0.432169	0.571377	0.551021	0.372614	0.632385	0.790982	0.740054	1.37812	1.47621	0.952325	1.59587	1.79762	0.939061	1.19024	1.28514	1.41127
852.683	1.00745	0.431967	0.702699	0.31606	0.694582	0.439684	0.908836	0.765329	0.930796	0.530934	0.839513	0.644619	0.99714	1.0679	1.20662	0.483392	0.844662	0.702075	1.11271	0.650545	0.457082	0.840012	0.657652	0.841865	0.677747	0.702589	0.625045	0.762723	0.589339	0.836714	0.592226	0.397066	0.378658	0.393528	0.434188	0.51488	0.369641	0.540986	0.688315	0.651116	1.18733	1.69257	1.0339	1.39171	1.7387	1.25882	1.05021	0.961552	1.02915
851.514	1.71961	0.312407	0.827298	0.287846	0.760605	0.437551	1.03898	0.777103	0.834135	0.409782	0.762475	0.61387	1.06851	0.999006	1.19421	0.4612	0.70943	0.647426	1.04678	0.611668	0.457487	0.819597	0.693842	0.778267	0.723235	0.621123	0.580503	0.716553	0.571275	0.827426	0.534179	0.390336	0.293909	0.407318	0.363672	0.508645	0.350562	0.46964	0.65944	0.634379	0.808621	2.00455	1.23562	0.938647	1.83591	1.48661	1.23841	0.673903	1.13573
850.345	1.79218	0.511477	0.863896	0.257772	0.513671	0.357976	0.95437	0.67588	0.864446	0.277683	0.740339	0.697664	1.09025	1.01198	1.24931	0.556879	0.679741	0.66622	0.996806	0.582027	0.527872	0.807388	0.801815	0.754247	0.78988	0.612091	0.541658	0.710319	0.564158	0.811357	0.597952	0.446138	0.306655	0.398391	0.418354	0.536302	0.380995	0.472346	0.643781	0.669041	0.618698	2.16034	1.45536	0.870416	2.21457	1.61529	1.50114	0.885754	1.16038
849.175	1.40667	0.971786	0.902844	0.336971	0.388055	0.388463	0.742272	0.685855	0.470659	0.212755	0.660751	0.745912	1.04309	1.01092	1.24478	0.552406	0.677941	0.713298	0.960517	0.561234	0.609897	0.924439	0.945386	0.755308	0.749792	0.590006	0.538594	0.694396	0.532619	0.822858	0.602721	0.430966	0.444973	0.370087	0.430239	0.542466	0.434981	0.506233	0.610997	0.682317	0.763464	2.15307	1.57615	1.30598	2.27819	1.27558	1.39888	1.06895	1.19206
848.005	1.21304	1.09606	1.06789	0.519865	0.421825	0.558864	0.488212	0.840909	0.466889	0.44584	0.582011	0.813939	0.994942	0.976021	1.20272	0.485433	0.649134	0.70595	0.954102	0.48003	0.678534	0.972022	1.00145	0.761463	0.731722	0.590422	0.555684	0.633769	0.480632	0.806261	0.612101	0.380256	0.482127	0.328823	0.434749	0.557785	0.487835	0.51704	0.612551	0.759527	0.899474	1.60886	1.40839	1.41576	2.16438	1.0718	1.36517	1.24111	1.44828
846.835	1.30748	1.0096	0.902176	0.627912	0.589355	0.467859	0.544115	0.86596	0.576209	0.407768	0.704109	0.828497	0.910614	1.01763	1.1622	0.430795	0.666926	0.69939	1.00911	0.471769	0.647814	0.980889	1.055	0.715719	0.774581	0.591127	0.573514	0.577594	0.471167	0.758197	0.600115	0.359949	0.564453	0.29751	0.50994	0.572736	0.523771	0.559566	0.622436	0.852103	1.07208	1.24632	1.31647	1.30085	2.22023	0.705999	1.41229	1.64532	1.53005
845.664	0.881099	0.671845	0.455762	0.441125	0.478321	0.386191	0.595	0.708776	0.546258	0.249203	0.744832	0.828263	0.825269	1.0622	1.06696	0.388124	0.68289	0.700052	1.0478	0.478395	0.747853	0.917409	1.01013	0.718627	0.70333	0.608824	0.548343	0.578529	0.420541	0.765821	0.509651	0.336483	0.467356	0.318785	0.458097	0.623102	0.595381	0.562149	0.683581	0.879477	1.3809	1.33223	1.45183	1.14986	2.1867	0.680757	1.42393	1.46018	1.58695
844.494	0.486913	0.385186	0.0853536	0.383368	0.461704	0.316405	0.516504	0.616853	0.16205	0.206461	0.79168	0.804618	0.878119	1.0697	1.12212	0.410048	0.636901	0.771659	1.05852	0.524398	0.725554	0.987074	0.964998	0.725193	0.790255	0.614362	0.576866	0.586673	0.43934	0.755407	0.441064	0.356732	0.433426	0.336748	0.420275	0.682675	0.653846	0.59248	0.751779	0.897151	1.51461	1.95001	1.55414	1.11876	2.04453	0.959429	1.45457	1.5549	1.61577
843.323	0.219235	0.554967	0.0995536	0.300308	0.357422	0.321165	0.671834	0.631312	0.280345	0.237731	0.931011	0.798841	0.885457	1.07333	1.17743	0.445423	0.715464	0.811468	1.04277	0.552894	0.675549	0.988807	0.914221	0.743916	0.854447	0.638657	0.571457	0.645702	0.446836	0.695391	0.427776	0.382416	0.330279	0.366031	0.386946	0.744543	0.707498	0.672852	0.798188	0.89808	1.36816	2.20769	1.66601	1.45552	2.19268	1.15197	1.62785	1.36477	1.44399
842.151	0.101898	0.766089	0.218912	0.251578	0.464377	0.376967	0.66516	0.714493	0.199042	0.26406	0.896219	0.81039	0.921199	1.04953	1.24707	0.426296	0.738344	0.804064	1.02522	0.610781	0.730353	1.03317	0.913923	0.743759	0.823903	0.562463	0.591971	0.63891	0.410944	0.717816	0.410342	0.395183	0.371188	0.350175	0.357726	0.783088	0.7799	0.713475	0.817761	0.884686	1.30498	2.61692	1.45563	1.95354	2.36927	1.17339	1.48438	1.19928	1.30862
840.98	0.62441	0.94651	0.519045	0.318483	0.605975	0.473955	0.682079	0.89659	0.533691	0.372681	0.93326	0.803184	0.937719	1.09116	1.28473	0.445155	0.753137	0.766896	1.02047	0.568612	0.771582	1.04957	0.937432	0.731104	0.815763	0.526597	0.610884	0.656471	0.358968	0.689966	0.395825	0.37259	0.244026	0.381021	0.370623	0.818082	0.841728	0.737161	0.824945	0.869693	1.13864	2.40715	0.858617	2.0205	2.53819	1.10483	1.18898	1.0707	1.48185
839.809	0.788052	0.742158	0.54074	0.347332	0.587967	0.276943	0.625379	1.10558	0.789235	0.24201	1.021	0.800928	0.93419	1.09598	1.25592	0.393972	0.760161	0.763767	1.06843	0.509581	0.828719	1.11605	0.999583	0.684831	0.782619	0.542362	0.646233	0.675893	0.378167	0.6686	0.319356	0.351962	0.314273	0.375646	0.358176	0.820665	0.841639	0.751913	0.822377	0.890019	0.6259	1.97433	0.61863	1.98812	2.51819	0.862946	1.24212	0.970752	1.4587
838.636	1.27872	0.561583	0.430409	0.371407	0.375137	0.301613	0.572952	1.06466	0.753809	0.215911	0.961905	0.823195	0.994219	1.12739	1.25492	0.320723	0.759514	0.786741	1.07022	0.524905	0.905856	1.065	1.02969	0.650743	0.664664	0.582532	0.682422	0.701942	0.34854	0.724657	0.267076	0.340996	0.318208	0.379921	0.28731	0.827388	0.823235	0.745851	0.810664	0.856778	0.693638	1.72585	0.858141	2.04561	2.30932	0.874379	1.08511	0.784388	1.81305
837.464	1.3338	0.317211	0.13216	0.587197	0.143539	0.218513	0.188028	0.90344	0.38542	0.291011	0.939645	0.812523	1.04645	1.12792	1.24709	0.321817	0.731997	0.825137	1.03763	0.44042	0.825055	1.0805	0.975103	0.644336	0.600946	0.592842	0.705672	0.672855	0.359027	0.756289	0.236779	0.292676	0.350394	0.296846	0.209976	0.802791	0.76295	0.737353	0.748454	0.763615	0.649666	1.8076	1.03211	1.77377	1.96461	0.671164	1.09907	1.09373	1.97922
836.291	1.43548	0.256035	0.339478	0.650161	0.0721124	0.253199	0.0256932	0.812233	0.34842	0.312321	0.94232	0.783457	0.998555	1.10053	1.15446	0.355424	0.713539	0.795571	0.985051	0.386835	0.645204	1.02511	0.883045	0.551022	0.54528	0.564132	0.66342	0.654075	0.308418	0.68145	0.196157	0.213424	0.273258	0.222022	0.102015	0.767307	0.64562	0.709041	0.670641	0.696682	0.706312	1.79622	1.20246	1.79128	1.79778	0.858451	1.21226	1.11001	1.46494
835.118	1.72154	0.143541	0.299194	0.736618	0.0144448	0.234341	0.088563	0.596533	0.280561	0.304841	0.853956	0.785535	1.03007	1.10444	1.06713	0.383688	0.643644	0.715996	0.925707	0.427813	0.60391	0.943802	0.856485	0.488227	0.530245	0.487522	0.601773	0.586465	0.269606	0.711085	0.190036	0.169983	0.245907	0.0947161	0.0949664	0.735513	0.599506	0.639083	0.598901	0.662221	0.878657	1.96224	1.31485	1.70525	2.02792	0.949696	1.37342	1.10009	1.22059
833.945	1.94731	0.436142	0.549548	0.817455	0.363954	0.441476	0.508593	0.629792	0.592377	0.502121	0.774774	0.765421	0.927908	1.13415	0.98952	0.405467	0.581539	0.608006	0.864633	0.399552	0.545915	1.00447	0.834934	0.487552	0.565988	0.475549	0.529068	0.58945	0.261086	0.655915	0.157364	0.168664	0.133411	0.0182906	0.137696	0.688808	0.591791	0.607102	0.540432	0.622522	1.34811	2.00354	1.1263	1.71529	2.08692	1.0068	1.45537	1.16285	1.29045
832.771	2.14946	0.414329	0.683528	0.902897	0.484043	0.428783	0.708127	0.782208	0.708229	0.572915	0.751683	0.707596	0.752909	1.05607	0.904321	0.317009	0.46133	0.548368	0.803738	0.349709	0.556859	1.0044	0.859657	0.503981	0.561385	0.462671	0.460104	0.533758	0.261416	0.554287	0.159646	0.16818	0.0947296	0.0275822	0.152752	0.613891	0.5573	0.554739	0.507457	0.609068	1.34006	1.52561	1.41627	1.52759	2.07638	1.02706	1.4645	1.21624	1.13856
831.598	2.11175	0.639707	0.854677	0.839077	0.652503	0.533972	0.698892	0.699833	0.709418	0.545165	0.670498	0.684568	0.670482	0.994172	0.882654	0.240957	0.412947	0.521709	0.725533	0.409797	0.577795	0.907996	0.73473	0.462562	0.481325	0.495151	0.457174	0.489637	0.26024	0.500701	0.201812	0.174557	0.0755038	0.0632959	0.151431	0.535337	0.498584	0.5319	0.472216	0.570922	1.58335	1.28067	1.28687	1.61708	1.92915	1.13636	1.33228	1.0755	1.17678
830.424	1.6604	0.774531	0.752154	0.917895	0.643202	0.459763	0.493584	0.768033	0.528385	0.568259	0.63299	0.674916	0.605815	0.831868	0.817587	0.181453	0.414639	0.462925	0.650217	0.365005	0.509907	0.788003	0.642811	0.44216	0.409097	0.468861	0.45208	0.400409	0.244671	0.459155	0.20984	0.184104	0.0493383	0.0999247	0.14207	0.455975	0.413679	0.473486	0.420384	0.542769	1.4126	1.52364	1.27295	1.49204	1.75	0.898437	0.924924	1.07114	1.15669
829.249	1.24012	0.556317	0.753713	0.656681	0.493438	0.473264	0.202904	0.49756	0.500704	0.319893	0.674987	0.640851	0.503506	0.702391	0.723661	0.13916	0.345363	0.395673	0.574489	0.30765	0.40092	0.689332	0.624564	0.332519	0.358323	0.424348	0.465696	0.327807	0.214249	0.419034	0.18417	0.182882	0.109922	0.127483	0.111603	0.404672	0.317896	0.404383	0.353562	0.487621	1.31823	1.32005	1.26901	1.3418	1.74545	0.907253	0.784905	1.08204	0.98565
828.074	0.576578	0.320334	0.625678	0.394541	0.268629	0.401885	0.205828	0.359983	0.507062	0.127977	0.7429	0.64524	0.523123	0.715807	0.64234	0.121729	0.281122	0.323077	0.505787	0.309448	0.332881	0.595383	0.569916	0.287075	0.366134	0.37636	0.464275	0.247775	0.180831	0.443166	0.176819	0.210914	0.251812	0.192001	0.122114	0.410303	0.282065	0.371272	0.332937	0.47719	0.947863	1.24565	1.10916	1.04678	1.71959	0.645561	0.703484	0.961974	0.926106
826.899	0.402056	0.307568	0.613732	0.339484	0.40867	0.40296	0.338551	0.278284	0.5698	0.256111	0.705856	0.650228	0.502099	0.670945	0.55206	0.155571	0.225328	0.296347	0.455938	0.194056	0.27006	0.585049	0.548663	0.283903	0.308548	0.34022	0.395146	0.251042	0.131065	0.409846	0.149245	0.237048	0.276051	0.238671	0.151649	0.40291	0.280422	0.348446	0.311025	0.454581	1.01062	1.0293	0.912264	1.23492	1.39709	0.556756	0.675826	0.803208	0.983279
825.725	0.319043	0.290706	0.651438	0.397612	0.385159	0.347882	0.343979	0.356553	0.506694	0.335844	0.713113	0.649708	0.451505	0.668415	0.471215	0.229001	0.218186	0.292975	0.410848	0.12066	0.229222	0.466544	0.633558	0.28181	0.304748	0.315992	0.327244	0.24636	0.074378	0.368688	0.176727	0.197931	0.198107	0.324361	0.151192	0.368669	0.298242	0.318443	0.329327	0.43425	0.922805	0.898089	1.09007	1.40025	1.24941	0.684758	0.852739	0.693369	1.14661
824.549	0	0.175964	0.657397	0.463165	0.253685	0.277624	0.292335	0.223252	0.548236	0.196156	0.675307	0.655587	0.343676	0.615592	0.377443	0.280065	0.204185	0.271859	0.371823	0.127413	0.286898	0.459287	0.505531	0.261905	0.235755	0.317676	0.293438	0.219149	0.0514161	0.32807	0.183737	0.141038	0.148116	0.283492	0.154013	0.338069	0.317858	0.333421	0.355577	0.364759	1.05079	0.590121	0.486336	1.46486	0.667258	0.614255	1.08567	0.563649	1.30121
823.373	0.124779	0.28309	0.430899	0.351668	0.168421	0.113602	0.292559	0.167595	0.240206	0.182236	0.524404	0.693521	0.307084	0.557878	0.335519	0.372667	0.256398	0.224713	0.364108	0.106025	0.217527	0.416621	0.504723	0.289064	0.185803	0.297393	0.263374	0.189986	0.0267745	0.297852	0.211754	0.136081	0.066874	0.275377	0.101125	0.284054	0.308316	0.259787	0.360712	0.306784	1.10879	0.729172	0.356276	1.31493	0.346522	0.57011	0.954876	0.416504	1.13755
822.197	1.02938	0.132481	0.307373	0.174745	0.102939	0.115777	0.317785	0.0150982	0.208868	0.113952	0.440636	0.706293	0.283577	0.539453	0.316513	0.303562	0.235758	0.171003	0.320872	0.0806543	0.228708	0.412805	0.553159	0.32296	0.200868	0.261293	0.279377	0.179446	0.0679805	0.272578	0.236375	0.122258	0.0773441	0.241862	0.0809522	0.238948	0.247814	0.180026	0.322856	0.257437	1.20833	0.419515	0.22463	0.565435	0.580514	0.549292	0.716051	0.207034	0.949291
821.021	1.25767	0.332505	0.431503	0.0795391	0.231145	0.114823	0.599236	0.0726709	0.212921	0.104302	0.384257	0.668807	0.275019	0.513214	0.313784	0.235482	0.185383	0.146274	0.283239	0.0732696	0.198408	0.39334	0.454173	0.324961	0.245509	0.168316	0.237249	0.203423	0.108771	0.237545	0.184077	0.154456	0.123112	0.272172	0.11276	0.185832	0.173906	0.121172	0.274382	0.223773	0.912155	0.234197	0.126353	0.0594152	0.466394	0.219376	0.460983	0.201308	0.525161
819.844	1.85587	0.490838	0.391169	0.0984586	0.432677	0.12924	0.610235	0.113543	0.0447614	0.21841	0.306646	0.617855	0.277673	0.504855	0.279605	0.188122	0.17563	0.161475	0.271432	0.101725	0.247076	0.324031	0.43496	0.313892	0.215267	0.0987725	0.187634	0.23576	0.149053	0.207808	0.13321	0.178313	0.202113	0.287088	0.177917	0.157134	0.114602	0.0944012	0.211799	0.222178	0.795947	0.188806	0.61668	0.193322	0.360994	0.436752	0.319537	0.313859	0.536956
818.667	1.89187	0.482487	0.383891	0.0984817	0.527843	0.274498	0.278356	0.39664	0.0383902	0.272719	0.323166	0.565887	0.250406	0.458214	0.212731	0.175833	0.192963	0.158736	0.230028	0.0709496	0.197506	0.246466	0.425852	0.202826	0.16528	0.0548225	0.125732	0.22949	0.204109	0.126519	0.0608468	0.143415	0.150567	0.235782	0.184377	0.104353	0.0809336	0.0431278	0.109807	0.221745	0.46992	0.325533	0.88291	0.466861	0.275611	0.552951	0.475302	0.383766	0.376266
817.49	1.689	0.222549	0.30575	0.338677	0.411572	0.332802	0.292502	0.511957	0.172941	0.236965	0.356386	0.512939	0.204516	0.344219	0.164952	0.181103	0.136756	0.112801	0.195033	0.0833497	0.244421	0.227788	0.313843	0.145205	0.138865	0.0236388	0.0948557	0.100139	0.235776	0.0791078	0.0326755	0.0775127	0.165361	0.108683	0.15993	0.0632824	0.0542426	0.0601067	0.0511214	0.169458	0.555342	0.196635	0.633442	0.705015	0.179047	0.605034	0.435181	0.658689	0.196732
816.312	1.17325	0.105041	0.137837	0.252532	0.341313	0.330804	0.275911	0.380771	0.253575	0.0789323	0.382002	0.522335	0.157361	0.338705	0.171446	0.29593	0.19549	0.0844049	0.21652	0.109422	0.261206	0.21884	0.303462	0.141183	0.175983	0.0440795	0.0951839	0.0578268	0.239614	0.0718431	0.066357	0.0525392	0.144837	0.112353	0.117126	0.0401553	0.0379728	0.067779	0.0235573	0.0693516	0.606787	0.261569	0.50931	0.712013	0.352005	0.571754	0.350602	0.644522	0.0753221
815.135	1.61678	0.16479	0.433336	0.479153	0.367669	0.457614	0.403854	0.345821	0.611419	0.308888	0.421163	0.541073	0.219867	0.333008	0.196373	0.22509	0.167284	0.0957152	0.232216	0.132022	0.272177	0.244289	0.326067	0.146958	0.209021	0.0715971	0.117097	0.0657044	0.254524	0.057173	0.15885	0.0361931	0.19327	0.168616	0.0729247	0.0541977	0.00928347	0.0506244	0.0220295	0.0393647	0.608624	0.332127	0.391249	0.308258	0.814791	0.661921	0.10909	0.619738	0.345315
813.957	1.78455	0.374539	0.57339	0.48382	0.309998	0.403324	0.597909	0.335606	0.552347	0.37637	0.424776	0.528759	0.18544	0.290842	0.176933	0.252434	0.147181	0.149674	0.243926	0.116201	0.253826	0.148451	0.249265	0.12259	0.284663	0.0751209	0.109209	0.150447	0.204643	0.107391	0.158128	0.0335091	0.240687	0.259946	0.110818	0.0412116	0.0127581	0.0373358	0.0652678	0.0287843	0.39521	0.321749	0.483153	0.191187	1.07929	0.380358	0.318454	0.567577	0.445546
812.778	1.80359	0.797116	0.637072	0.383395	0.285229	0.356897	0.625669	0.271554	0.395232	0.424347	0.401566	0.487738	0.176812	0.314809	0.141721	0.240874	0.191413	0.194784	0.251028	0.206855	0.252307	0.085233	0.261968	0.20393	0.29864	0.0739361	0.171079	0.248042	0.19639	0.126844	0.148831	0.0918273	0.283837	0.351765	0.168582	0.0639046	0.0442893	0.0649113	0.0999412	0.0744684	0.139956	0.244686	0.7177	0.277427	0.822765	0.591593	0.374666	0.276754	0.988165
811.6	1.78208	0.764566	0.542046	0.289602	0.224376	0.318316	0.206555	0.169997	0.494173	0.475637	0.331182	0.433665	0.0998527	0.27475	0.0780439	0.209893	0.262334	0.261295	0.19717	0.200412	0.206536	0.0544901	0.281992	0.201708	0.3279	0.0671655	0.145578	0.249181	0.187762	0.11085	0.107851	0.129185	0.251262	0.359365	0.18941	0.066031	0.0818419	0.0456803	0.120525	0.181335	0.034345	0.369835	0.57263	0.382812	0.635272	0.821182	0.365822	0.0711261	1.05074
810.421	1.64369	0.784223	0.381207	0.399312	0.245676	0.165659	0.216708	0.222471	0.410106	0.492928	0.246084	0.347285	0.108846	0.193108	0.0396822	0.223854	0.308499	0.275635	0.127752	0.168474	0.260314	0.123927	0.261836	0.264375	0.304212	0.0258026	0.108622	0.151253	0.263018	0.139861	0.0453559	0.101706	0.161588	0.247691	0.159203	0.0670219	0.0868582	0.0596702	0.122088	0.223115	0.3157	0.592729	0.291068	0.450143	0.743428	0.986377	0.249239	0.124601	0.822071
809.242	0.883484	0.679075	0.329485	0.383611	0.266617	0.309658	0.293213	0.179397	0.576925	0.303356	0.227331	0.289178	0.0784741	0.174345	0.0405573	0.192912	0.370429	0.22569	0.0593956	0.161686	0.203215	0.202649	0.261228	0.25586	0.327315	0.0171879	0.0776843	0.118887	0.318662	0.120355	0.0396365	0.108615	0.188529	0.239652	0.184303	0.0503599	0.11317	0.0704011	0.113536	0.184627	0.400092	0.606974	0.26931	0.612903	0.840155	0.748223	0.30388	0.330816	0.73986
808.062	0.932411	0.525302	0.714078	0.59117	0.478368	0.533086	0.436659	0.289169	0.864372	0.48667	0.228677	0.247665	0.128679	0.143493	0.106249	0.182697	0.371415	0.199661	0.0657907	0.101195	0.118302	0.248332	0.303567	0.24714	0.246644	0.0588927	0.0608106	0.0706369	0.413758	0.0824182	0.0713759	0.0968175	0.270002	0.19093	0.207801	0.0371283	0.130761	0.0507972	0.133262	0.174277	0.506913	0.848146	0.0899682	0.70569	0.925376	0.538095	0.210673	0.750791	0.902944
806.883	0.924311	0.48582	0.628377	0.670619	0.460976	0.534271	0.552767	0.339861	0.572888	0.570603	0.188219	0.212322	0.115397	0.167234	0.1294	0.214493	0.300496	0.150373	0.0553097	0.0480341	0.0922024	0.159557	0.303143	0.154296	0.150228	0.0666011	0.0738402	0.0534955	0.350827	0.111492	0.13055	0.0785017	0.338917	0.188555	0.229374	0.0467881	0.135859	0.0394412	0.135782	0.154346	0.357633	0.580237	0.364169	0.660974	1.27322	0.126639	0.256159	0.71726	0.7185
805.702	0.896519	0.592645	0.752628	0.770718	0.443813	0.435231	0.736734	0.306887	0.405471	0.507287	0.174998	0.165944	0.139546	0.16497	0.154205	0.267182	0.198156	0.0792013	0.0730527	0.101494	0.0808712	0.155654	0.272474	0.138967	0.118384	0.0857775	0.0891083	0.0941	0.329596	0.107031	0.209642	0.120045	0.258846	0.218084	0.28034	0.0437959	0.167786	0.060727	0.0943013	0.166741	0.204398	0.428509	0.694484	0.552483	1.16464	0.353158	0.541871	0.444371	0.831613
804.522	1.17655	0.410987	0.582925	0.711816	0.363843	0.189223	0.542368	0.114648	0.336787	0.523545	0.15378	0.142908	0.176981	0.171932	0.128852	0.242378	0.0943281	0.044259	0.0911581	0.136615	0.174829	0.0797541	0.265199	0.0767076	0.155792	0.098769	0.109643	0.122321	0.273288	0.0794458	0.258654	0.151211	0.30336	0.239843	0.270809	0.0602409	0.148	0.0752907	0.121523	0.204797	0.111654	0.730173	0.649565	0.470994	1.13176	0.688309	0.513793	0.364808	0.918719
803.342	1.92405	0.637402	0.458166	0.851394	0.472996	0.262591	0.713998	0.253785	0.352283	0.534364	0.109903	0.127242	0.186942	0.152977	0.0776238	0.196869	0.0396039	0.0349623	0.118994	0.136882	0.251215	0.132951	0.199422	0.0426218	0.141842	0.0735674	0.0550151	0.128876	0.252736	0.12933	0.223592	0.170134	0.251981	0.278293	0.232597	0.0881176	0.135018	0.0935464	0.101446	0.206196	0.169971	1.01369	0.965454	0.520048	1.41755	0.750227	0.525107	0.423494	0.949844
802.16	2.1459	0.640671	0.517813	0.853056	0.59864	0.489373	0.924243	0.353178	0.444633	0.51477	0.124268	0.119333	0.0933301	0.0931949	0.0172006	0.122222	0	0.0267875	0.0793595	0.177482	0.187413	0.134254	0.146754	0.0195004	0.0742251	0.0296336	0.0410576	0.116392	0.295083	0.140691	0.211662	0.177347	0.316071	0.37026	0.2449	0.0499912	0.126135	0.0962623	0.138689	0.203372	0.186394	1.16165	1.1109	0.747507	1.45909	0.753742	0.529143	0.833054	1.04618
800.979	2.10469	0.533467	0.688825	0.774642	0.749735	0.660956	0.965524	0.489189	0.738528	0.622245	0.0806962	0.110511	0.0389361	0	0.013464	0.0663774	0.045141	0.0774635	0.0988689	0.135979	0.118817	0.15635	0.0825298	0.015635	0.0205309	0.0409442	0.0430315	0.0494466	0.367487	0.0781927	0.170475	0.153904	0.302461	0.364891	0.265094	0.0226161	0.132616	0.103851	0.197009	0.187181	0.433032	0.953103	0.636552	0.731615	1.30519	0.715942	0.373012	1.06078	0.833493
799.798	1.76797	0.724331	0.793471	0.776371	0.863322	0.773635	1.05274	0.677214	0.732408	0.914047	0.0244982	0.0781206	0.0310299	0.052443	0.0229798	0.0514604	0.0836422	0.13723	0.0868921	0.118425	0.0951241	0.113697	0.0662659	0.0453723	0.0586444	0.0583367	0.0888865	0.0310533	0.35173	0.141391	0.199449	0.14155	0.360168	0.40493	0.283529	0.0380373	0.188214	0.146475	0.238279	0.15959	0.611444	0.476923	0.706275	0.787631	1.28861	0.873244	0.277641	0.97022	0.600319
798.616	1.49679	0.789585	0.960841	0.868318	1.00422	0.700334	1.01089	0.660874	0.918381	1.05342	0.0365983	0.0784914	0.0427095	0.163869	0.0904883	0.188376	0.130729	0.179896	0.0898971	0.138782	0.145039	0.131668	0.0605158	0.0905116	0.13182	0.170165	0.0955477	0.0885201	0.372534	0.148456	0.321101	0.153657	0.408718	0.427975	0.342738	0.0702117	0.283297	0.198809	0.261323	0.189354	0.676226	0.388699	0.560676	0.531432	1.21319	1.06176	0.316659	0.886906	0.625928
797.435	1.58699	1.12721	1.07302	0.924068	0.972673	0.654037	0.857095	0.747712	1.12365	1.22157	0.112453	0.0819116	0.134767	0.245095	0.145542	0.227327	0.165429	0.217725	0.0658368	0.17399	0.252167	0.123284	0.0724151	0.160079	0.273063	0.285224	0.155357	0.148227	0.437967	0.135617	0.416644	0.241754	0.556711	0.46479	0.358264	0.147599	0.296086	0.21273	0.31619	0.219946	0.817599	0.620294	0.338109	0.41969	1.17019	1.09661	0.286041	0.936972	0.763403
796.252	1.58871	1.44484	1.08391	1.02286	0.861202	0.761831	0.891288	0.794461	1.1249	1.01646	0.131811	0.0591491	0.191217	0.341334	0.153088	0.250994	0.271526	0.308712	0.0621088	0.19868	0.326777	0.0610285	0.103741	0.179187	0.314557	0.330764	0.170664	0.207794	0.478816	0.109218	0.478474	0.329302	0.648057	0.527146	0.378743	0.23784	0.333707	0.203281	0.285701	0.253904	0.804032	0.769124	0.535888	0.562975	1.15755	0.919011	0.694821	0.726983	1.02878
795.069	1.62856	1.31069	0.979373	0.994321	0.752387	0.708861	0.95802	0.634419	0.945108	0.829479	0.193007	0.0417383	0.165021	0.30139	0.152053	0.270289	0.332121	0.309078	0.0140856	0.277502	0.359904	0.0666056	0.229238	0.172163	0.318136	0.306169	0.165576	0.250945	0.530483	0.114339	0.513318	0.374171	0.657682	0.573068	0.404616	0.265439	0.348137	0.204596	0.312805	0.319897	0.782434	0.904532	0.612492	0.855154	1.17994	0.801764	0.925891	0.730991	1.53593
793.886	1.75555	1.27548	0.927456	0.952349	0.726541	0.838124	0.942418	0.641653	1.00665	0.691079	0.148122	0.0416951	0.123605	0.176795	0.10092	0.225695	0.35724	0.268299	0	0.292413	0.276864	0.112743	0.317041	0.130444	0.313695	0.291341	0.141282	0.215895	0.590703	0.0804344	0.510643	0.379569	0.613957	0.545136	0.451261	0.255915	0.352281	0.188126	0.285695	0.330066	0.947764	0.646626	0.657973	0.885548	1.1128	0.567717	1.08903	0.534201	1.34747
792.703	2.47364	1.09451	0.858706	0.759333	0.617359	0.756593	0.850428	0.652212	0.807413	0.755925	0.14372	0.0192527	0.154393	0.153056	0.0981282	0.354975	0.42859	0.216087	0.0572245	0.397856	0.366644	0.113512	0.399049	0.212666	0.445847	0.34842	0.176712	0.266446	0.618796	0.171593	0.567306	0.447405	0.647007	0.630347	0.611554	0.294489	0.422688	0.26319	0.375101	0.363562	0.840389	0.839371	0.933329	1.29263	1.40496	0.699056	1.23619	0.444699	0.959661
791.52	2.57459	0.891259	0.938975	0.754884	0.750657	0.841957	0.729627	0.702778	0.959537	0.800223	0.0845648	0.0715424	0.184502	0.152588	0.110732	0.489576	0.437915	0.190452	0.138338	0.476349	0.41342	0.115217	0.442254	0.251854	0.499286	0.393803	0.189601	0.289401	0.615289	0.243634	0.611495	0.516522	0.745324	0.669058	0.6781	0.29865	0.505481	0.314455	0.401271	0.421408	0.609179	1.10358	1.06611	1.00393	1.33139	0.910493	0.641898	0.576702	0.903122
790.336	2.69054	1.17475	1.14614	0.962817	1.0397	1.01335	0.838003	0.867432	1.24702	0.888691	0.102612	0.131111	0.319447	0.169705	0.172656	0.506872	0.484718	0.242502	0.180551	0.520526	0.490238	0.227622	0.454526	0.367809	0.614471	0.486673	0.230447	0.30383	0.660462	0.336901	0.650385	0.647566	0.879001	0.774369	0.722196	0.331574	0.551908	0.368619	0.445921	0.47609	0.665246	1.37596	1.26156	0.938097	1.4368	1.06476	0.310659	0.675683	0.895847
789.151	2.41009	1.29565	1.145	1.15043	1.2247	0.989772	0.970873	0.94256	1.12631	0.776165	0.18671	0.147086	0.433418	0.213873	0.24092	0.558024	0.545516	0.388803	0.194534	0.560979	0.530625	0.273172	0.492624	0.410975	0.592675	0.555671	0.349351	0.360182	0.73712	0.347091	0.795753	0.719813	0.976837	0.882733	0.788468	0.380256	0.604919	0.421827	0.486518	0.530223	0.651681	1.14781	1.1578	0.904718	1.29305	1.32324	0.385812	0.66928	1.17532
787.967	1.60483	1.28871	0.985484	1.16477	1.15844	0.86807	1.06179	0.833873	1.03561	0.847345	0.276171	0.169571	0.514079	0.273917	0.360914	0.618376	0.622503	0.485083	0.189152	0.574124	0.522994	0.418537	0.625772	0.400938	0.650087	0.580882	0.391178	0.402735	0.77127	0.372535	0.891541	0.749848	1.11024	0.959722	0.808204	0.421289	0.648979	0.491795	0.586849	0.595862	0.6912	0.874744	1.19928	1.07697	1.23904	1.36981	0.396447	0.835263	1.75061
786.782	1.83015	1.45974	1.07618	1.21623	1.31046	1.01493	1.29134	1.01865	1.1408	1.02949	0.364459	0.195141	0.509806	0.337317	0.410287	0.647104	0.59845	0.56383	0.167886	0.562601	0.445163	0.413662	0.739635	0.45688	0.656449	0.642769	0.452349	0.445523	0.858169	0.393077	0.930591	0.767191	1.1987	1.0448	0.854587	0.453354	0.679617	0.544594	0.620865	0.65118	0.968653	0.718482	1.49429	1.26957	1.15423	1.1262	0.422463	1.09581	1.77231
785.598	2.43424	1.46585	1.1106	1.24704	1.25732	1.12498	1.41835	1.09824	1.31612	1.18995	0.457923	0.199099	0.542031	0.362132	0.496252	0.722265	0.624427	0.599065	0.255038	0.625986	0.532752	0.408027	0.747581	0.492949	0.777561	0.750104	0.503974	0.53079	0.970297	0.452466	1.00709	0.790126	1.21436	1.09015	0.955875	0.534329	0.71588	0.641209	0.743942	0.726478	1.05309	0.912776	1.30594	1.43854	1.59376	1.16159	0.73287	1.25137	1.50709
784.412	2.67198	1.39206	1.20803	1.18421	1.22817	1.4109	1.57866	1.19042	1.34127	1.3405	0.434662	0.233492	0.575287	0.343299	0.549367	0.734718	0.646939	0.585728	0.268113	0.716007	0.539672	0.366384	0.759837	0.558134	0.845046	0.784177	0.526253	0.560212	0.994218	0.545885	0.986174	0.86441	1.24419	1.06321	0.994314	0.555057	0.780591	0.678319	0.779429	0.756138	1.35706	1.11957	1.38038	1.40213	1.67551	1.20023	1.04428	1.26422	1.42452
783.227	2.77686	1.69642	1.27671	1.21201	1.44325	1.46575	1.47066	1.03267	1.23642	1.26792	0.377521	0.239423	0.588359	0.310887	0.588893	0.740986	0.657738	0.55705	0.262875	0.803651	0.573426	0.400732	0.626348	0.626981	0.860091	0.814257	0.499427	0.573421	0.966316	0.612008	0.973315	0.92236	1.29581	1.07641	1.02268	0.549977	0.844311	0.663118	0.82775	0.757133	1.75624	1.31429	1.25515	1.39107	1.73107	0.885757	1.43305	1.22131	1.35842
782.041	2.86283	1.5114	1.13152	1.13157	1.42688	1.43502	1.37883	0.825069	0.970241	1.07638	0.367989	0.201617	0.526075	0.231613	0.623016	0.777646	0.66548	0.57578	0.260116	0.844954	0.621001	0.404211	0.562765	0.642647	0.858809	0.8462	0.518977	0.593922	1.04866	0.630402	1.06844	1.00875	1.30755	1.08764	1.11194	0.581316	0.892335	0.676142	0.852423	0.780894	2.02514	1.24707	1.38162	1.24777	1.7494	0.897279	1.55198	1.18579	1.59129
780.855	2.09648	1.28737	1.00274	1.0359	1.21539	1.18849	1.19124	0.699158	0.876234	1.01775	0.356532	0.199977	0.513599	0.21945	0.641552	0.840125	0.763977	0.640067	0.272591	0.875165	0.716877	0.434672	0.683863	0.685961	0.970191	0.900483	0.542363	0.641045	1.12257	0.64822	1.19735	1.12707	1.43335	1.1904	1.21545	0.650198	0.957702	0.737655	0.924935	0.845823	2.13427	1.15541	1.70539	1.31653	1.70865	0.914769	1.33298	1.19862	2.00712
779.669	2.82365	1.2786	1.26779	1.10433	1.21385	1.03547	1.26302	0.846481	0.905371	1.08131	0.345304	0.219859	0.489794	0.253537	0.634247	0.895833	0.787361	0.721159	0.262259	0.893331	0.783417	0.391363	0.807716	0.750897	0.961244	1.01583	0.601276	0.72321	1.19231	0.72281	1.31222	1.29186	1.49333	1.39821	1.36423	0.731255	1.03529	0.860763	0.995728	1.00719	2.1493	1.15648	2.1224	1.63802	1.58057	1.16844	1.13529	1.44415	2.13434
778.481	2.72113	1.18676	1.38667	1.32392	1.18776	0.990434	1.35581	0.987044	1.19215	1.06875	0.402856	0.284845	0.574974	0.243603	0.655754	1.04544	0.896997	0.866571	0.362439	1.00226	0.928577	0.358567	0.894311	0.883777	1.14519	1.182	0.714866	0.839898	1.35459	0.827059	1.55892	1.48648	1.64596	1.56837	1.57897	0.849526	1.16862	1.01944	1.13663	1.19562	1.95274	1.11449	2.14292	1.94211	1.80672	1.62208	1.09489	1.54172	2.08067
777.295	2.62788	1.22885	1.56586	1.40236	1.24054	1.15137	1.49568	1.21065	1.34825	1.21051	0.575262	0.376888	0.708002	0.316953	0.699218	1.24592	1.07867	0.956933	0.403708	1.23015	1.07851	0.364445	1.06565	1.07231	1.39365	1.37705	0.829359	0.972442	1.48978	0.943242	1.83972	1.81288	1.92535	1.8683	1.84441	0.984974	1.4005	1.23813	1.33411	1.39601	1.90153	1.48001	2.34701	2.21869	1.95891	2.15938	1.35018	1.48163	1.98459
776.107	2.71175	1.47808	1.76305	1.44897	1.29317	1.30599	1.47063	1.26718	1.55895	1.17814	0.681708	0.48715	0.779755	0.393818	0.770987	1.53526	1.25284	1.06665	0.435163	1.58952	1.27169	0.430222	1.27609	1.31926	1.60372	1.57213	0.902187	1.09851	1.68002	1.11944	2.196	2.19518	2.36745	2.29818	2.25936	1.13835	1.69901	1.43425	1.6197	1.63832	2.00827	2.13564	2.33934	2.26139	2.08943	2.18431	2.05887	1.78635	1.88921
774.92	2.44397	1.46987	1.89287	1.49586	1.31788	1.53077	1.55973	1.27716	1.75179	1.2751	0.811396	0.520168	0.8936	0.462388	0.842578	1.84238	1.44772	1.22183	0.524696	1.84095	1.4421	0.56088	1.42697	1.59231	1.78684	1.75755	0.973778	1.23158	1.95023	1.21557	2.62907	2.65715	2.88159	2.7237	2.71099	1.31153	2.00355	1.63676	1.90092	1.92985	1.92428	2.41706	2.18332	2.26899	2.2187	2.32715	2.30896	1.98803	1.92474
773.732	2.44129	1.40268	2.02568	1.59827	1.49592	1.67956	1.84585	1.27804	1.83722	1.40949	0.844006	0.602371	1.03071	0.531942	0.951228	2.20883	1.64378	1.41025	0.566106	2.1204	1.6572	0.709767	1.78225	1.85425	1.98505	1.97527	1.06259	1.34446	2.22077	1.30979	3.09818	3.15575	3.46075	3.31605	3.19549	1.4926	2.31775	1.83538	2.19205	2.23807	1.98026	2.57866	2.1293	2.31215	2.14118	2.39353	2.18299	2.0908	1.89744
772.544	3.27595	1.675	2.19525	1.67383	1.60724	1.83543	2.02381	1.21146	1.83321	1.6711	0.806664	0.646083	1.06706	0.598588	1.06265	2.46407	1.785	1.60353	0.586122	2.38776	1.91983	0.858955	2.04028	2.13061	2.06393	2.12422	1.12089	1.44022	2.45788	1.46775	3.5266	3.65482	3.99608	3.96891	3.7057	1.66173	2.58771	2.03099	2.43645	2.56211	2.04483	2.53835	2.00829	2.45235	2.29325	2.24491	2.32921	2.26784	2.07689
771.355	3.36595	1.80487	2.2091	1.9693	1.99386	1.84403	2.13979	1.2307	1.96834	1.93686	0.818202	0.718013	1.0922	0.628029	1.12173	2.77299	1.99631	1.80298	0.65813	2.67331	2.16056	0.921267	2.1819	2.36657	2.32524	2.22408	1.21775	1.54241	2.65065	1.52069	3.89527	4.12316	4.36642	4.62219	4.17028	1.77639	2.78546	2.18909	2.60518	2.75933	2.10347	2.03357	1.92711	2.55498	2.46477	2.18324	2.19254	2.37577	2.22579
770.167	3.44473	1.94235	2.46457	2.04241	2.18578	1.9339	2.20532	1.28034	2.07085	2.11946	0.916638	0.778922	1.01177	0.691214	1.2046	3.04788	2.14257	1.91392	0.748683	2.91223	2.384	0.943521	2.4676	2.55113	2.67886	2.29955	1.23003	1.6467	2.77613	1.52869	4.28019	4.53394	4.76912	5.19902	4.52256	1.85796	2.93931	2.33765	2.75545	2.93006	2.10285	1.95395	1.89426	2.32604	2.62535	2.43145	1.90421	2.14428	2.66656
768.978	3.59184	2.16066	2.50282	2.08823	2.14555	1.99918	2.34048	1.34575	2.15683	2.10966	0.943404	0.8343	0.927616	0.717017	1.25835	3.22487	2.25178	1.98436	0.776847	3.21071	2.56881	0.97009	2.94041	2.70979	2.87891	2.3098	1.21963	1.69237	2.91486	1.57686	4.5599	4.88198	5.04273	5.65246	4.79921	1.89342	3.03306	2.40536	2.84162	3.01205	2.48999	2.311	1.85852	2.43696	2.84983	2.37979	2.13414	2.08004	2.8818
767.789	3.13396	2.28804	2.45035	2.10903	2.10188	2.0036	2.35582	1.44505	2.35155	2.11276	0.975134	0.834582	0.908837	0.683499	1.26174	3.34576	2.2491	2.00743	0.79345	3.29343	2.65753	1.04867	3.09055	2.73444	2.92976	2.22403	1.15806	1.65465	2.95997	1.57381	4.70451	4.97148	5.24852	5.74148	4.86621	1.82531	3.05633	2.3534	2.8299	3.01701	2.58053	2.80248	1.63054	2.54139	2.98147	2.69855	2.19895	1.93467	3.02158
766.599	2.96297	2.14148	2.29792	2.00376	1.86249	1.9705	2.20158	1.38935	2.0491	1.99124	0.946014	0.77871	0.934671	0.620975	1.2311	3.33853	2.17779	1.94341	0.766314	3.27792	2.64462	1.08714	3.10347	2.65228	2.85473	2.13235	1.08659	1.57466	2.89004	1.47114	4.63769	4.84468	5.13538	5.56895	4.71048	1.70271	2.97554	2.18519	2.71145	2.86453	2.80923	3.01639	1.67908	2.80247	2.87903	2.95332	2.31354	1.84712	2.86037
765.409	2.56182	2.26589	2.04843	1.80585	1.68483	2.09282	1.92759	1.24764	1.88909	1.94884	0.837268	0.67177	0.818826	0.578777	1.1284	3.11203	1.92996	1.79521	0.717848	3.13129	2.52117	1.02242	2.88825	2.45473	2.57254	1.92491	0.978463	1.42113	2.71561	1.35522	4.33476	4.50409	4.87346	5.13682	4.36908	1.55308	2.76133	1.92269	2.46315	2.62273	2.8028	3.0211	1.91622	2.92528	2.96488	2.82846	2.59711	1.77018	2.72704
764.219	2.40193	2.46318	2.05441	2.02349	1.91757	2.31808	2.04377	1.44777	2.03707	2.18478	0.738098	0.575386	0.730614	0.50516	1.00429	2.85542	1.73953	1.6284	0.683559	2.81365	2.19688	0.996613	2.52559	2.15372	2.25601	1.68704	0.84364	1.27335	2.46348	1.16442	3.83761	4.03902	4.33829	4.54863	3.91525	1.34128	2.39272	1.64898	2.14086	2.30535	2.74582	2.6004	2.34396	2.95187	2.77868	2.77601	2.60614	1.84277	2.71245
763.028	2.28094	2.27763	2.17955	2.07296	1.92362	2.1624	1.92905	1.475	1.98716	2.23487	0.628052	0.438825	0.590157	0.452677	0.860792	2.45652	1.43894	1.40437	0.611274	2.29929	1.82316	0.887824	2.15436	1.87469	1.99214	1.44923	0.679998	1.11017	2.15888	1.01089	3.33275	3.52375	3.78203	3.84238	3.38943	1.11984	2.01181	1.36043	1.8292	1.97792	2.28326	2.09766	2.56009	2.78951	2.52768	2.58433	2.21146	1.60621	2.82516
761.838	2.23127	2.10334	2.09441	1.98148	1.8826	1.87853	1.85208	1.42882	1.87418	2.1633	0.481902	0.343799	0.482083	0.336395	0.711658	1.95586	1.18154	1.14904	0.48923	1.84012	1.45456	0.765481	1.86394	1.56825	1.6743	1.21864	0.524687	0.920434	1.81198	0.839202	2.79882	2.99866	3.12179	3.22142	2.87567	0.902106	1.62564	1.11954	1.50094	1.64236	1.93859	1.96674	2.57951	2.55844	2.45394	2.3887	1.76455	1.60612	2.56905
760.646	2.66097	1.69489	1.98355	1.85189	1.95718	1.48907	1.81986	1.44436	2.08328	2.04912	0.390348	0.310076	0.406308	0.221592	0.621742	1.55913	0.993263	1.00831	0.444948	1.40932	1.17231	0.735396	1.6545	1.269	1.46919	1.028	0.440996	0.723848	1.57557	0.807886	2.35695	2.4684	2.61999	2.63837	2.44372	0.695158	1.32123	0.957352	1.2224	1.36541	1.86736	2.14178	2.65263	2.41527	2.62693	2.27103	1.45939	1.63193	2.43659
759.455	3.06943	1.45509	1.88238	1.67126	1.97923	1.36532	1.61609	1.43995	2.04436	1.92962	0.297611	0.245593	0.456265	0.161394	0.544299	1.26836	0.915889	0.840251	0.414242	1.14711	1.02828	0.625278	1.43404	1.10775	1.32438	0.895541	0.393537	0.608594	1.3292	0.706784	2.00318	2.02533	2.1236	2.15484	2.08816	0.548757	1.07687	0.815808	1.00659	1.12023	1.69012	1.80748	2.26541	2.20206	2.58327	2.27321	1.38892	1.66379	2.13445
758.264	2.80945	1.50272	1.74642	1.51958	2.06329	1.4265	1.58151	1.29073	2.04633	1.93423	0.154252	0.204607	0.447842	0.174218	0.509406	1.07783	0.783933	0.670148	0.431108	0.992983	0.983874	0.492696	1.23411	0.919558	1.20797	0.716877	0.37272	0.500616	1.13721	0.598103	1.71731	1.66857	1.82165	1.75832	1.81818	0.459892	0.910184	0.700826	0.85486	0.958957	1.59589	1.70787	2.11497	2.0631	2.54655	2.15164	1.57268	1.70465	1.64678
757.071	3.07544	1.84291	1.71257	1.42385	2.09492	1.71242	1.96932	1.31661	2.12204	1.82283	0.0886527	0.14784	0.448425	0.137445	0.499971	0.971867	0.705079	0.604468	0.474823	0.863079	0.924611	0.461327	1.17978	0.791417	1.10991	0.602862	0.299428	0.436232	1.00414	0.520676	1.51162	1.40078	1.58109	1.45601	1.53693	0.409594	0.756922	0.592483	0.734082	0.847703	1.43507	1.6873	2.10494	2.22385	2.43287	2.07394	1.60948	1.64056	1.62989
755.88	2.42054	1.78276	1.50326	1.53575	1.87352	1.64008	1.78047	1.10241	1.84196	1.54266	0.12368	0.0882583	0.463902	0.148188	0.400122	0.821436	0.567441	0.492876	0.486101	0.740513	0.78299	0.375233	1.05403	0.719943	1.04729	0.503141	0.284404	0.398266	0.882559	0.487178	1.36167	1.21631	1.34621	1.20285	1.2848	0.376163	0.706755	0.47239	0.648093	0.797742	1.37545	1.49151	1.82413	2.44959	2.29526	2.01384	1.60314	1.40323	1.75439
754.687	1.91335	1.79948	1.31015	1.391	1.55325	1.5716	1.58276	0.782442	1.49129	1.4416	0.13381	0.0529941	0.387732	0.109882	0.325082	0.652	0.424055	0.444406	0.457931	0.637	0.654686	0.327566	0.880396	0.706969	0.957675	0.432167	0.249341	0.394749	0.746599	0.423219	1.2184	0.988908	1.0982	1.07115	1.07583	0.350078	0.635524	0.372022	0.574132	0.724832	1.25374	1.45633	1.62969	2.18069	2.17673	2.0099	1.64045	1.1383	1.71133
753.494	1.87944	1.55437	1.14786	1.47161	1.37806	1.35612	1.33523	0.712666	1.3879	1.18437	0.181143	0.0728396	0.339664	0.114581	0.292821	0.594482	0.365833	0.443423	0.496197	0.533941	0.44685	0.352046	0.84541	0.637744	0.840728	0.429584	0.259996	0.351495	0.753105	0.421841	1.03978	0.822315	1.0216	0.965121	0.905326	0.323025	0.584114	0.354479	0.506924	0.692614	1.57944	1.7557	1.58476	1.93245	2.24343	1.88913	1.55161	1.01799	1.85322
752.301	1.94784	1.53138	1.1912	1.51241	1.40834	1.31997	1.17426	0.798647	1.43297	1.09816	0.163752	0.119866	0.357025	0.157787	0.305837	0.586168	0.391855	0.396211	0.465251	0.52849	0.395535	0.276019	0.779101	0.647776	0.777771	0.424396	0.241019	0.281163	0.777981	0.416012	0.924283	0.727446	0.973189	0.846907	0.837596	0.298019	0.545042	0.370859	0.474561	0.679848	1.33716	1.69593	1.44186	1.40368	2.24187	1.96264	1.57765	0.887296	1.97485
751.107	2.23346	1.70758	1.28926	1.62141	1.51607	1.3269	1.29216	1.16883	1.69948	1.4552	0.165006	0.197384	0.39383	0.194036	0.364267	0.620427	0.475043	0.375139	0.494201	0.580405	0.440038	0.363986	0.805115	0.662637	0.81114	0.420195	0.268254	0.311728	0.828505	0.398174	0.897903	0.732351	0.992587	0.759184	0.865497	0.264304	0.529631	0.408703	0.49053	0.693174	1.13187	2.11463	1.5581	1.2006	2.16302	1.95623	1.73973	0.863097	1.75124
749.914	3.04467	1.96631	1.47185	1.5892	1.59186	1.42754	1.59864	1.48231	1.99378	1.49127	0.183572	0.267103	0.374801	0.234907	0.432475	0.660367	0.555817	0.391811	0.501456	0.574743	0.481028	0.360283	0.833529	0.662245	0.829197	0.452693	0.2759	0.291227	0.875304	0.392894	0.819733	0.696282	1.02612	0.683004	0.790139	0.27523	0.487572	0.387443	0.471448	0.674076	0.905764	2.09854	1.69824	1.47668	2.08114	1.85009	1.70538	0.874453	1.6787
748.72	3.2445	2.06215	1.6508	1.7552	1.53685	1.53545	1.75491	1.70609	2.07855	1.63446	0.283337	0.310067	0.501608	0.271996	0.51908	0.667534	0.635494	0.385375	0.528129	0.614311	0.481955	0.363639	0.815655	0.698644	0.939552	0.480979	0.333435	0.328646	0.878755	0.450017	0.775986	0.694132	1.05927	0.594753	0.756204	0.303726	0.522491	0.376555	0.486903	0.727105	1.05439	1.82379	1.59696	1.90763	2.00309	1.71717	1.77494	1.03345	1.6427
747.525	3.58541	2.17749	1.95124	1.61122	1.50945	1.68519	1.97202	1.71046	2.01355	1.90946	0.366818	0.333565	0.567069	0.27319	0.587741	0.611943	0.620717	0.439455	0.550284	0.617668	0.520859	0.424179	0.734686	0.751894	0.997208	0.527572	0.362931	0.395685	0.89389	0.479072	0.643588	0.600344	1.07797	0.530415	0.694594	0.331354	0.548331	0.363354	0.498885	0.733347	1.27548	1.65227	1.56353	2.02026	2.03112	1.83479	1.81166	1.07906	1.43934
746.331	3.2839	1.9541	2.00985	1.52537	1.39215	1.71227	1.91856	1.52625	1.95067	1.87776	0.459714	0.355003	0.687036	0.314691	0.665811	0.580028	0.633036	0.503308	0.606579	0.57943	0.469778	0.510778	0.679549	0.76539	1.00091	0.544235	0.377452	0.365678	0.947625	0.452272	0.52895	0.515989	1.04903	0.504938	0.624587	0.359404	0.536791	0.416987	0.49075	0.765678	1.7285	1.87645	1.69247	2.03501	2.10728	1.87272	1.71941	1.49994	1.52721
745.136	2.86445	1.87553	1.96174	1.58573	1.42548	1.60839	1.89479	1.30519	1.6979	1.79241	0.540176	0.45301	0.753108	0.374186	0.759913	0.556329	0.681982	0.568637	0.679264	0.642009	0.497612	0.589421	0.693568	0.802446	1.04261	0.529363	0.394387	0.352844	1.05226	0.465207	0.520144	0.460893	1.05535	0.437864	0.595629	0.406831	0.525007	0.480888	0.552904	0.789185	1.85398	1.90931	1.89483	2.33789	2.54508	2.27455	1.65072	1.96984	2.13814
743.941	2.2187	1.89244	1.84635	1.73254	1.82116	1.52695	1.96055	1.33752	1.72182	1.65905	0.624879	0.575143	0.874959	0.412752	0.837332	0.564512	0.769969	0.63192	0.776483	0.670747	0.501718	0.762964	0.815976	0.84198	1.07938	0.529274	0.411694	0.407663	1.09895	0.486345	0.562366	0.437257	1.00874	0.396508	0.574609	0.435337	0.511425	0.539534	0.593286	0.834327	1.91572	2.63788	2.2709	2.44556	2.84323	2.71528	1.96914	1.93773	2.47293
742.745	2.22324	1.81614	1.65451	1.69119	1.96921	1.53986	1.88237	1.34367	1.63824	1.5015	0.61342	0.706738	0.966757	0.505155	0.925554	0.578101	0.87523	0.717105	0.863573	0.727854	0.485776	0.818652	0.843747	0.86424	1.0842	0.556476	0.438755	0.396866	1.18088	0.517298	0.573668	0.412313	0.98968	0.436839	0.538474	0.50871	0.525285	0.580471	0.617421	0.81598	1.90066	2.64184	3.09451	2.69537	3.04466	2.9382	2.58771	2.1518	2.77603
741.55	1.81346	1.64715	1.49302	1.67769	1.9055	1.49071	1.81044	1.42798	1.49322	1.37956	0.623953	0.756071	1.05831	0.568296	1.02851	0.605389	0.982479	0.751221	0.935222	0.749888	0.54177	0.877866	0.854374	0.867447	1.14912	0.57786	0.450844	0.348487	1.23901	0.54483	0.541518	0.435133	0.929563	0.455096	0.528431	0.553968	0.550982	0.606469	0.584147	0.813675	2.00862	2.72093	3.65138	2.96786	3.45968	3.09036	3.30051	2.46783	3.22804
740.354	2.18695	1.72356	1.43681	1.58689	1.7407	1.53371	1.79036	1.46346	1.52939	1.42658	0.701008	0.779671	1.11833	0.634907	1.11764	0.60239	1.0612	0.793418	0.955975	0.817462	0.607014	0.885764	0.920867	0.925855	1.25011	0.702914	0.457812	0.367035	1.31372	0.564228	0.506137	0.458567	0.920205	0.553737	0.548974	0.598339	0.590665	0.623593	0.575396	0.83883	2.21111	3.57638	4.41255	3.49983	4.00911	3.31453	3.86709	2.86761	3.46183
739.157	2.2957	1.41356	1.34237	1.55234	1.34755	1.54016	1.54882	1.34075	1.57508	1.46402	0.745483	0.743828	1.14057	0.689839	1.14622	0.623918	1.09091	0.805428	0.982746	0.832788	0.575597	0.844079	0.944884	0.962415	1.26866	0.736772	0.475507	0.298817	1.36943	0.559283	0.537256	0.495837	0.850775	0.598984	0.560095	0.591507	0.587275	0.63735	0.565078	0.850509	2.71814	4.14587	5.0936	3.82098	4.4566	3.53743	4.21751	3.49556	4.02746
737.961	2.33855	1.51683	1.35695	1.52829	1.10863	1.33071	1.42061	1.10285	1.51549	1.53057	0.815764	0.753244	1.06395	0.727521	1.19177	0.682192	1.08759	0.802498	1.03306	0.898848	0.58761	0.84951	0.964929	0.92977	1.26146	0.72818	0.495117	0.369301	1.42182	0.524437	0.584462	0.53484	0.939481	0.594725	0.610899	0.61362	0.594831	0.626477	0.598657	0.842282	3.4067	4.9498	5.62009	4.7474	5.21906	4.40299	4.59893	4.2549	4.83833
736.764	2.12371	1.53617	1.38944	1.43029	1.3182	1.13828	1.58787	1.15024	1.77347	1.43023	0.819812	0.713833	1.11058	0.74645	1.21641	0.673653	1.04189	0.760296	1.08965	0.873478	0.610233	0.872664	0.948176	0.881449	1.19316	0.692908	0.486483	0.378434	1.3945	0.492904	0.621657	0.506631	1.0534	0.587137	0.607281	0.611489	0.595239	0.615347	0.620445	0.856675	4.11232	5.80725	5.71369	5.42045	5.72493	5.25516	4.99513	4.53759	5.53321
735.566	2.73207	1.5482	1.54406	1.57366	1.60496	1.34425	1.69234	1.30356	1.82795	1.55251	0.762626	0.70729	1.09148	0.752203	1.24841	0.630614	0.964907	0.774861	1.11964	0.8952	0.702388	0.960044	0.894501	0.884079	1.12046	0.664023	0.476012	0.365829	1.36373	0.443309	0.695202	0.523091	1.15331	0.61085	0.648136	0.631272	0.616873	0.63957	0.644163	0.833461	4.42912	5.74304	5.99695	5.88253	5.9813	5.87584	5.52258	4.88806	6.20841
734.369	2.55765	1.47685	1.50434	1.61941	1.63028	1.31318	1.68827	1.45631	1.67512	1.33408	0.67998	0.695232	1.07013	0.756878	1.26444	0.619547	0.93735	0.794405	1.11846	0.819304	0.802947	1.06062	0.916336	0.912685	1.19674	0.625054	0.511044	0.307944	1.32887	0.423861	0.66905	0.519536	1.16255	0.620397	0.667079	0.613656	0.605744	0.627128	0.619154	0.80615	4.67818	5.64535	6.31755	6.06634	6.32448	5.9388	5.91473	5.17621	6.58411
733.171	2.83639	1.35514	1.35069	1.64041	1.74866	1.34006	1.68558	1.38292	1.83355	1.1535	0.684225	0.672715	1.09838	0.724837	1.24804	0.554142	0.952302	0.812779	1.06703	0.703915	0.812847	1.09392	0.982093	0.987424	1.23416	0.631615	0.493533	0.290788	1.31122	0.430452	0.643057	0.483241	1.12668	0.672437	0.66633	0.600491	0.551976	0.604877	0.601995	0.777954	4.38094	5.71872	6.50774	5.81607	6.32617	5.57997	6.00396	5.1712	6.24416
731.973	3.02225	1.21572	1.28304	1.53463	1.63325	1.28658	1.42629	1.17966	1.69866	1.03669	0.684857	0.661462	1.10084	0.626224	1.11019	0.517597	0.902428	0.731622	0.963055	0.621845	0.703719	1.06157	0.885317	0.937405	1.09978	0.581341	0.4563	0.212554	1.18609	0.436519	0.547783	0.41504	0.939875	0.575355	0.585717	0.549136	0.488864	0.52903	0.548301	0.695434	3.96013	5.17428	5.97171	4.90309	6.11984	4.70388	5.62695	4.63509	5.81498
730.774	2.56349	1.15034	1.20867	1.17095	1.31795	1.0792	1.27234	0.953116	1.50415	1.00971	0.696848	0.63675	1.02097	0.574379	1.03079	0.415464	0.881131	0.640091	0.886407	0.5229	0.569574	0.976735	0.782321	0.858525	0.996455	0.513959	0.393004	0.250712	1.03842	0.401442	0.451263	0.367675	0.750858	0.509008	0.552605	0.509377	0.42452	0.441565	0.473324	0.602817	3.61798	4.61055	5.4617	4.13307	5.7348	3.99999	5.12448	4.06044	4.91249
729.576	2.22564	1.02221	1.10136	0.937772	1.09258	0.798824	1.33391	0.868042	1.38608	1.00892	0.686885	0.582022	1.01491	0.559024	0.931293	0.411095	0.820353	0.567301	0.813721	0.502964	0.447978	0.805148	0.670814	0.813769	0.82633	0.458632	0.348541	0.231416	0.866899	0.372541	0.404429	0.291548	0.630642	0.404625	0.455501	0.453394	0.396996	0.408118	0.417225	0.504884	3.09014	4.11959	4.64271	3.93349	5.21623	3.54438	4.48717	3.35039	4.22293
728.377	1.78538	1.29485	1.19551	1.12438	1.09384	0.939032	1.41513	0.926855	1.12428	1.31303	0.76186	0.550882	0.970549	0.590001	0.890606	0.4357	0.763029	0.467888	0.764299	0.52184	0.467755	0.753479	0.515984	0.751863	0.813748	0.407662	0.359785	0.245678	0.779636	0.345503	0.433834	0.276338	0.467607	0.308096	0.428563	0.432468	0.374172	0.421181	0.400503	0.459225	2.54243	3.28892	3.90434	3.45985	4.36517	2.93638	3.60773	2.61608	3.59496
727.178	1.33257	1.40446	1.24081	1.25828	0.980602	1.04457	1.46833	1.08185	0.967819	1.18309	0.731265	0.523298	0.895072	0.621414	0.887714	0.443685	0.71137	0.441287	0.758113	0.491875	0.378174	0.741218	0.490417	0.667804	0.892644	0.404667	0.408647	0.281455	0.692129	0.388963	0.399221	0.261862	0.371531	0.250707	0.380904	0.411207	0.381379	0.440903	0.437434	0.459699	2.23974	2.85045	3.57709	3.06083	3.66508	2.33905	2.91677	2.03884	3.20354
725.978	1.48774	1.21954	1.25987	1.31437	1.03597	1.18526	1.47922	0.933284	1.09164	1.10859	0.739545	0.534521	0.877898	0.60733	0.862154	0.494918	0.710814	0.436367	0.784593	0.417609	0.336401	0.733967	0.456899	0.624866	0.889658	0.42036	0.423161	0.262295	0.677862	0.416496	0.372947	0.273163	0.363959	0.235467	0.384922	0.423939	0.362291	0.486621	0.46004	0.479848	2.08829	2.37386	2.90687	2.63217	2.95474	2.0054	2.66629	1.83916	2.89172
724.778	2.1792	1.50455	1.36998	1.21605	1.11292	1.30212	1.40492	0.989194	1.1814	1.19329	0.707784	0.604793	0.891421	0.541226	0.809046	0.513067	0.653104	0.408652	0.804738	0.403752	0.413966	0.767431	0.385634	0.558199	0.768744	0.427774	0.437255	0.249509	0.654047	0.397466	0.397879	0.287726	0.401473	0.279696	0.365274	0.452266	0.375176	0.503062	0.463098	0.467671	1.75551	2.0502	2.02453	2.26035	2.39754	1.95202	2.27131	1.33485	2.66728
723.577	2.57658	1.57352	1.13956	1.16082	1.18112	1.23459	1.36204	0.983647	1.31512	1.1604	0.695792	0.676935	0.895693	0.607511	0.841954	0.49822	0.7327	0.46188	0.815865	0.44468	0.526103	0.760518	0.520605	0.607864	0.807138	0.469775	0.488596	0.364098	0.668219	0.439453	0.452968	0.331087	0.571188	0.389233	0.42593	0.516272	0.424937	0.52561	0.504395	0.491883	1.80742	1.94652	1.59709	1.89043	2.0009	1.91484	2.16484	1.20669	2.4549
722.377	2.47525	1.45425	1.0235	1.19855	1.15288	0.88125	1.15356	0.907044	1.27973	1.0278	0.671501	0.749217	0.899913	0.682964	0.875414	0.569736	0.755852	0.540026	0.781765	0.527603	0.648512	0.74999	0.522816	0.697315	0.800038	0.503662	0.543877	0.440067	0.657787	0.492914	0.483411	0.384341	0.729411	0.41495	0.471389	0.585996	0.487869	0.585585	0.527689	0.507386	1.92265	1.9033	1.5517	1.90059	1.81013	2.13624	2.11889	1.15773	2.24475
721.177	1.75589	1.33853	0.808223	1.15847	1.18877	0.675145	0.986627	0.942721	1.18485	1.05892	0.757521	0.788099	0.965507	0.793668	0.895705	0.650596	0.802175	0.553968	0.822242	0.636905	0.741354	0.79943	0.570688	0.707356	0.882387	0.529921	0.626132	0.508282	0.673857	0.530579	0.483415	0.430066	0.771961	0.48325	0.518951	0.619714	0.540259	0.650906	0.58538	0.561736	1.70009	1.75192	1.60672	1.81549	1.44265	1.6152	1.69875	1.24043	1.8337
719.976	1.04647	1.12987	0.70107	0.994045	1.13309	0.720951	1.02699	1.01316	1.07431	0.799596	0.750702	0.73833	0.883099	0.829838	0.886506	0.669485	0.828509	0.579673	0.847814	0.651282	0.643651	0.880227	0.618669	0.699428	0.875258	0.546065	0.673813	0.548104	0.66384	0.645251	0.468533	0.425583	0.727059	0.511323	0.528087	0.640174	0.56195	0.673862	0.638356	0.622216	1.5853	1.54248	1.83518	1.66578	1.34385	1.22963	1.56537	1.02628	1.49758
718.773	0.618799	1.02793	0.837289	0.99684	1.08764	0.875942	1.14804	0.996107	1.05524	0.848387	0.837778	0.739497	0.896342	0.828194	0.908124	0.751796	0.838317	0.578974	0.864901	0.596371	0.592593	0.928479	0.664416	0.685567	0.826582	0.582396	0.695685	0.551039	0.666723	0.66591	0.469297	0.433394	0.644982	0.530502	0.595025	0.633437	0.555382	0.656164	0.638461	0.685832	1.38241	1.21023	1.77	1.7324	1.14379	0.745538	1.75938	1.1879	1.37482
717.572	0.904706	1.244	1.0347	0.933141	1.07563	1.0708	1.29361	1.19956	1.15375	1.0076	0.900418	0.708822	0.843492	0.714664	0.873087	0.633315	0.722041	0.513149	0.887947	0.523988	0.558373	0.87726	0.645362	0.630655	0.745421	0.557125	0.680236	0.569293	0.648416	0.608804	0.511581	0.428138	0.442657	0.561417	0.565856	0.599399	0.519369	0.617474	0.592079	0.680893	0.845631	0.989345	1.67778	1.44035	1.1337	0.751724	1.33331	0.751414	1.09796
716.37	1.72154	1.34079	0.924532	1.00358	1.10423	0.988379	1.26388	1.01982	1.23631	0.99904	0.917331	0.706478	0.809619	0.672104	0.866216	0.560627	0.64569	0.477868	0.841521	0.491133	0.542015	0.904145	0.709058	0.619399	0.764239	0.527341	0.649142	0.616323	0.622127	0.574654	0.529109	0.414071	0.476667	0.564751	0.531912	0.544217	0.475304	0.553793	0.55247	0.659893	0.858599	1.16236	1.34574	1.05096	1.16051	0.525927	1.38722	0.548416	1.20907
715.168	2.05587	1.21669	1.02686	1.16068	1.0797	0.984488	1.18147	0.864294	1.35911	0.936735	0.829984	0.707412	0.740637	0.651139	0.830656	0.489583	0.495303	0.446284	0.753798	0.432378	0.554186	0.884691	0.617166	0.578773	0.692588	0.456025	0.552131	0.595675	0.526844	0.500688	0.466663	0.392771	0.546076	0.530799	0.476962	0.487624	0.419289	0.479058	0.469696	0.597556	1.11467	1.18167	0.947456	0.679544	1.21417	0.89772	1.19835	0.258408	1.27746
713.965	2.62297	1.30201	1.17357	1.40297	1.26172	0.940694	1.37759	1.07327	1.63719	0.998885	0.727938	0.688701	0.685318	0.625795	0.72533	0.416906	0.384741	0.432543	0.712263	0.452584	0.513649	0.829364	0.518998	0.522086	0.660054	0.391771	0.462215	0.496182	0.392816	0.392619	0.407447	0.344725	0.570806	0.489161	0.442983	0.409408	0.39051	0.437235	0.439835	0.547913	0.922177	1.30556	0.37343	0.747751	1.22343	0.902682	0.922407	0.273687	1.25682
712.762	2.82649	1.61721	1.15856	1.41719	1.28429	0.969956	1.49472	1.19377	1.53293	1.05111	0.572111	0.653291	0.571605	0.619752	0.608236	0.430453	0.433485	0.455464	0.663503	0.484634	0.469322	0.790955	0.50435	0.504503	0.623793	0.280502	0.422506	0.401264	0.338186	0.338065	0.401746	0.275737	0.674149	0.472142	0.414818	0.392685	0.345458	0.374283	0.415086	0.474007	0.81866	1.14632	0.332833	0.911879	1.15899	0.781327	0.900165	0.222325	0.919357
[truncated: 85 more rows]
[truncated: 136 more columns]

## Sheet: L. iners
Wavenumber	LI e2 batch 1'	LI e2 batch 1'	LI e2 batch 1'	LI e2 batch 1'	LI e2 batch 1'	LI e2 batch 1'	LI e2 batch 1'	LI e2 batch 1'	LI e2 batch 1'	LI e2 batch 1'	LI e2 batch 1'	LI e2 batch 1'	LI e2 batch 1'	LI e2 batch 1'	LI e2 batch 1'	LI e3 batch 1'	LI e3 batch 1'	LI e3 batch 1'	LI e3 batch 1'	LI e3 batch 1'	LI e3 batch 1'	LI e3 batch 1'	LI e3 batch 1'	LI e3 batch 1'	LI e3 batch 1'	LI e3 batch 1'	LI e3 batch 1'	LI e3 batch 1'	LI e3 batch 1'	LI e3 batch 1'	LI e4 batch 1'	LI e4 batch 1'	LI e4 batch 1'	LI e4 batch 1'	LI e4 batch 1'	LI e4 batch 1'	LI e4 batch 1'	LI e4 batch 1'	LI e4 batch 1'	LI e4 batch 1'	LI e4 batch 1'	LI e4 batch 1'	LI e4 batch 1'	LI e4 batch 1'	LI e4 batch 1'	LI e5 batch 1'	LI e5 batch 1'	LI e5 batch 1'	LI e5 batch 1'
[truncated: 1,023 more rows]
[truncated: 129 more columns]

[truncated: 1 more sheets: Abbreviation Key]
