# Supplementary material for: Characterization of vaginal Lactobacillus in biologically relevant fluid using surface-enhanced Raman spectroscopy
Source: Royal Society of Chemistry journal article supplement (doi:10.1039/d4an00854e), 2024-01-01
Supplement: d4an00854e2.pdf [file d4an00854e2.pdf]

## Characterization of Vaginal Lactobacillus in Biologically Relevant Fluid using Surface-Enhanced Raman Spectroscopy

Anna S. Rourke-Funderburg<sup>a,b</sup>, Anita Mahadevan-Jansen<sup>a,b</sup>, Andrea K. Locke<sup>a,b,c\*</sup>

<sup>a</sup>Department of Biomedical Engineering, Vanderbilt University

<sup>b</sup>Vanderbilt Biophotonics Center, Vanderbilt University

<sup>c</sup>Department of Chemistry, Vanderbilt University

\*corresponding author: [andrea.locke@vanderbilt.edu](mailto:andrea.locke@vanderbilt.edu)

### Transmission Electron Microscopy

*L. crispatus* cultures were grown following procedures outlined previously. Liquid cultures were washed via centrifugation at 3,300g for 8 minutes and resuspended with sterile DI water. Washed cultures and AuNPs were mixed at a 1:4 volumetric ratio (bacteria:AuNPs) by pipetting and were vortexed for 2-3 seconds to ensure homogenous mixing. The solution was allowed to sit for 15 minutes to allow for AuNPs and bacteria interaction. Following the 15-minute interaction period, the solution was centrifuged at 725 RCF for 15 minutes and the supernatant was replaced with 2.5% glutaraldehyde for bacterial cell fixation. The solution was fixed in glutaraldehyde for 30 minutes before a 5  $\mu$ L droplet was applied to a TEM grid (Ted Pella; Redding, CA). The grid was allowed to dry for 30 minutes then washed with DI water twice. The grid was allowed to fully dry before being imaged using a Tecnai Osiris TEM (Thermo Fisher Scientific, Waltham, MA) at 3,600X and 6,300X magnification with 200 kV accelerating voltage and a 1 second integration time.

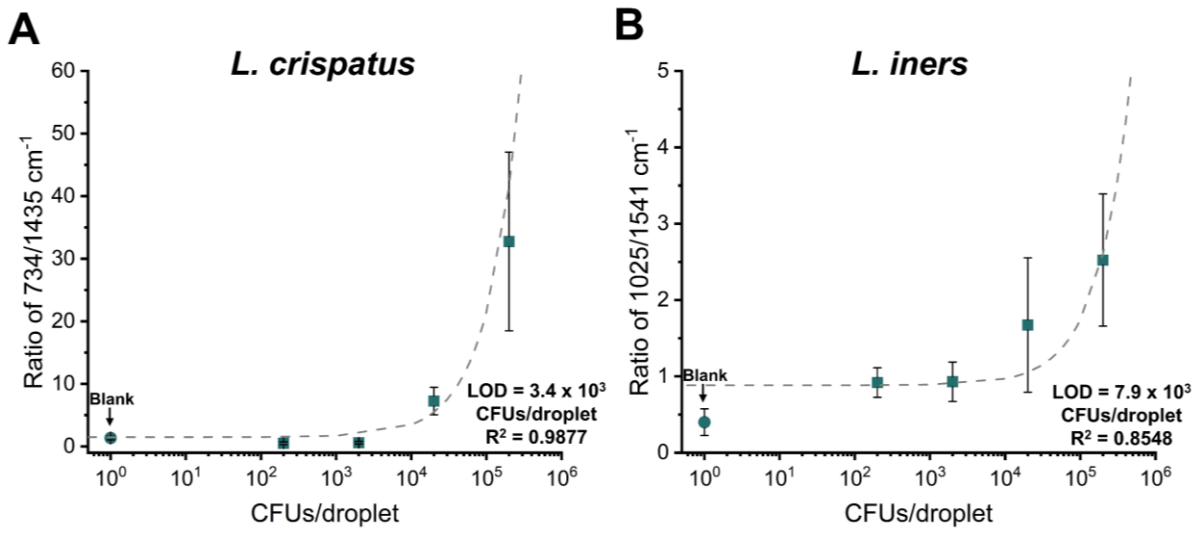

**Supplemental Figure 1.** Scatter plots of ratiometric values used to calculate the limit of detection (LOD) of (A) *L. crispatus* and (B) *L. iners* with goodness of fit ( $R^2$ ) reported.

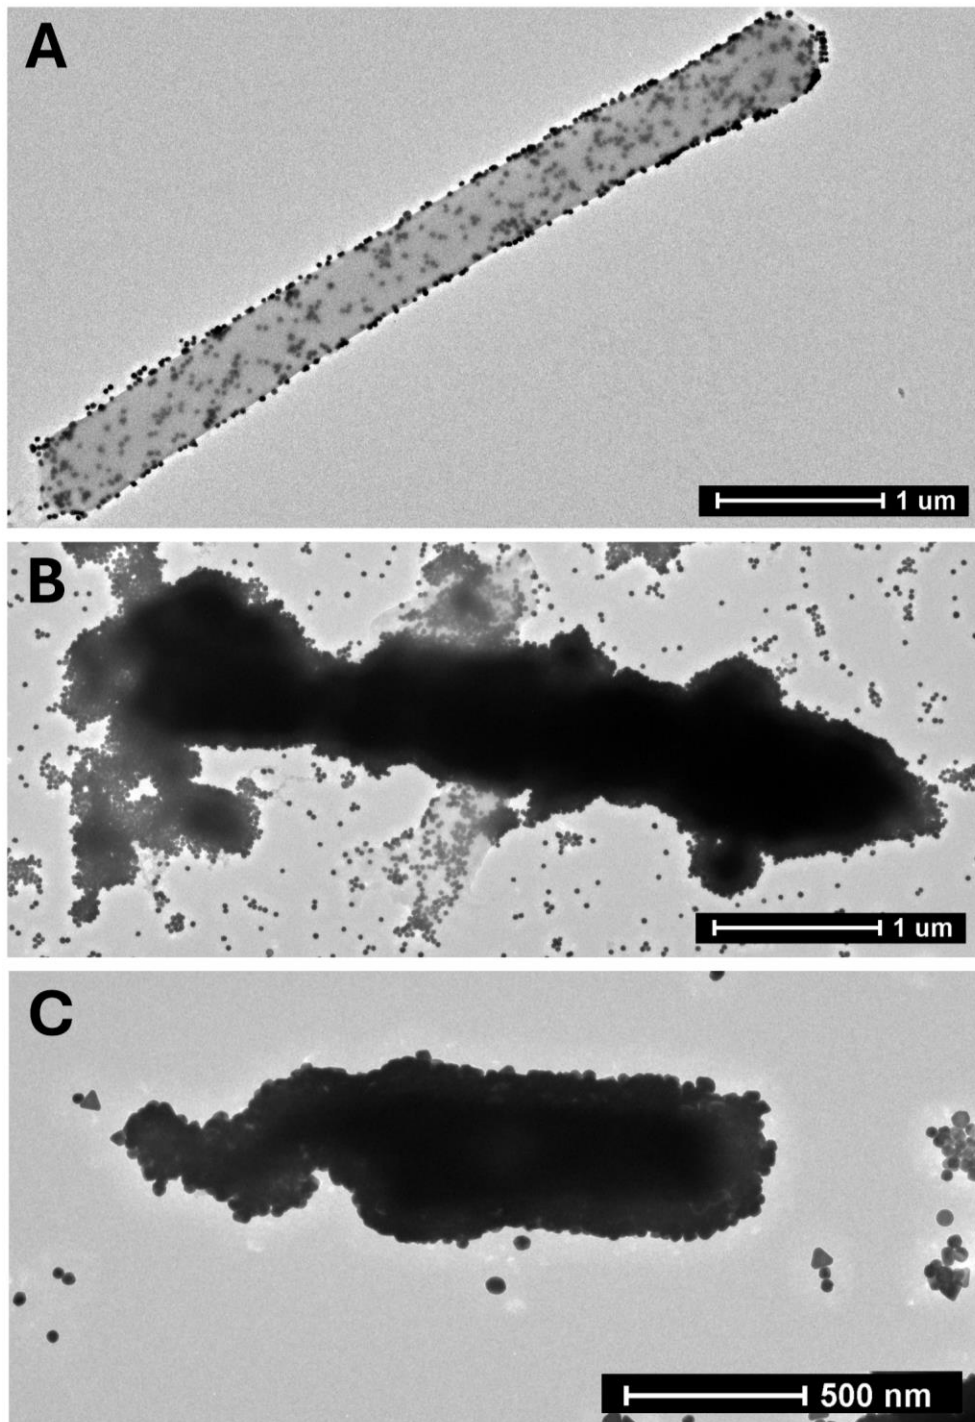

**Supplemental Figure 2.** TEM images of *L. crispatus* and *L. iners* cells at varying bacterial concentrations showing variations in the density of AuNPs attached to the bacterial cell wall and differing cell morphology: (A) *L. crispatus*,  $2 \times 10^5$  CFUs/droplet, 3600X magnification; (B) *L. crispatus*,  $2 \times 10^3$  CFUs/droplet, 3600X magnification; (C) *L. iners*,  $2 \times 10^3$  CFUs/droplet, 6300X magnification.

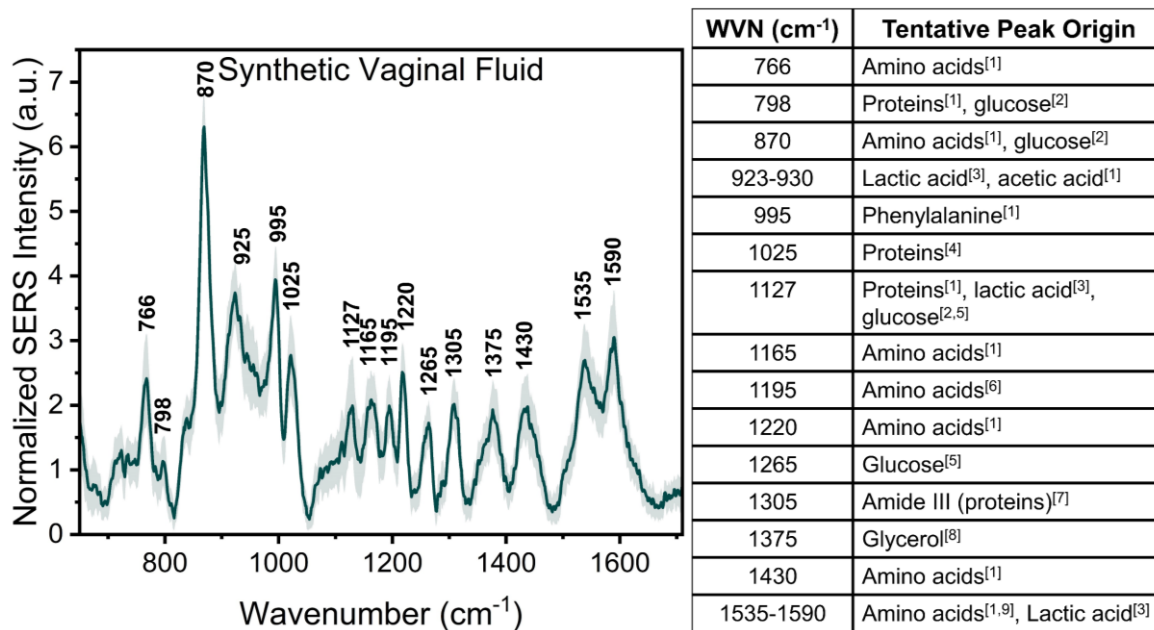

**Supplemental Figure 3.** SERS spectrum of SVF. Each spectra is the mean and standard deviation (represented by shaded error bars) of 3 experimental replicates [n=45 spectra] and table of peak origins for the highlighted peaks.

**Supplemental Table 1.** Table of wavenumber assignments of peaks with VIP value greater than 1 in both PLSR models.

| WVN (cm <sup>-1</sup> ) | Pure or Complex | Tentative assignment                                                                                                        |
|-------------------------|-----------------|-----------------------------------------------------------------------------------------------------------------------------|
| 734                     | Both            | C-N stretching, the glycosidic ring vibrations, or in plane breathing mode of adenine <sup>[10-13]</sup>                    |
| 768                     | Pure            | Indole ring breathing/stretching <sup>[6, 16, 17]</sup>                                                                     |
| 865                     | Complex         | Indole ring scissoring, indole N-H displacement, indole ring vibration with N-H bending, C-H stretching <sup>[1,2,14]</sup> |
| 962                     | Pure            | C=C deformation, C-N stretching, C-O stretching, CH <sub>3</sub> symmetric stretching <sup>[11]</sup>                       |
| 989-998                 | Both            | Phenyl ring angular bending vibrations <sup>[15]</sup>                                                                      |
| 1025                    | Complex         | C-N or C-C stretching, or C-H in plane bending <sup>[11]</sup>                                                              |
| 1315-1320               | Both            | CH <sub>3</sub> CH <sub>2</sub> vibrations, Amide III <sup>[6]</sup>                                                        |
| 1340                    | Pure            | CH <sub>3</sub> CH <sub>2</sub> wagging, Amide III, CH <sub>2</sub> wagging, C-H deformation <sup>[6]</sup>                 |
| 1380-1390               | Complex         | CH <sub>3</sub> , C-H, C-N vibrations <sup>[6]</sup>                                                                        |
| 1430-1440               | Both            | CH <sub>2</sub> scissoring and deformation <sup>[6]</sup>                                                                   |
| 1457-1468               | Complex         | CH <sub>2</sub> and C-H vibrations <sup>[11]</sup>                                                                          |
| 1535                    | Pure            | Amide carbonyl group vibrations <sup>[6]</sup>                                                                              |
| 1560                    | Pure            | Amide I, C=O stretching, C=C bending <sup>[11]</sup>                                                                        |

## References:

- 1 G. P. Szekeres and J. Kneipp, *Front Chem*, 2019, **7**, 434849.
- 2 T. T. B. Quyen, W. N. Su, K. J. Chen, C. J. Pan, J. Rick, C. C. Chang and B. J. Hwang, *Journal of Raman Spectroscopy*, 2013, **44**, 1671–1677.
- 3 M. Verma, T. K. Naqvi, S. K. Tripathi, M. M. Kulkarni, N. E. Prasad and P. K. Dwivedi, *IEEE Trans Nanobioscience*, 2022, **21**, 294–300.
- 4 S. Bashir, H. Nawaz, M. Irfan Majeed, M. Mohsin, A. Nawaz, N. Rashid, F. Batool, S. Akbar, M. Abubakar, S. Ahmad, S. Ali and M. Kashif, *Spectrochim Acta A Mol Biomol Spectrosc*, 2021, **258**, 119831.
- 5 O. Lyandres, N. C. Shah, C. R. Yonzon, J. T. Walsh, M. R. Glucksberg and R. P. Van Duyne, *Anal Chem*, 2005, **77**, 6134–6139.
- 6 Z. Movasaghi, S. Rehman and I. U. Rehman, *Appl Spectrosc Rev*, 2007, **42**, 493–541.
- 7 X. Yu, W. Li, O. Liang, Y. Bai and Y. hong Xie, *Anal Biochem*, 2020, **599**, 113709.
- 8 A. C. De Luca, P. Reader-Harris, M. Mazilu, S. Managò, S. Mariggìo, D. Corda and A. Di Falco, in *SPIE BiOS: Plasmonics in Biology and Medicine XI*, SPIE, 2014, vol. 8957, p. 895709.
- 9 W. Xiaodan, Z. Dawei, Z. Ping, L. Taifeng, W. Huiqin and Z. Yongwei, *J Appl Biomater Funct Mater*, 2018, **16**, 157–162.
- 10 W. R. Premasiri, J. C. Lee, A. Sauer-Budge, R. Theberge, C. E. Costello, L. D. Ziegler and D. Fraunhofer, *Anal Bioanal Chem*, 2016, **408**, 4631–4647.
- 11 S. M. Berus, M. Adamczyk-Popławska, K. Goździk, G. Przedpełska, T. R. Szyborski, Y. Stepanenko and A. Kamińska, *Int J Mol Sci*, 2022, **23**, 12576.
- 12 S. Efrima and L. Zeiri, *Journal of Raman Spectroscopy*, 2009, **40**, 277–288.
- 13 P. Kubryk, R. Niessner and N. P. Ivleva, *Analyst*, 2016, **141**, 2874.
- 14 G. Pezzotti, *Journal of Raman Spectroscopy*, 2021, **52**, 2348–2443.
- 15 B. Hernández, F. Pflüger, S. G. Kruglik and M. Ghomi, *Journal of Raman Spectroscopy*, 2013, **44**, 827–833.
- 16 I. A. Boginskaya, E. A. Slipchenko, M. V. Sedova, J. Y. Zvyagina, A. D. Maximov, A. S. Baburin, I. A. Rodionov, A. M. Merzlikin, I. A. Ryzhikov and A. N. Lagarkov, *Chemosensors*, 2023, **11**, 321.
- 17 S. Stewart and P. M. Fredericks, *Spectrochim Acta A Mol Biomol Spectrosc*, 1999, **55**, 1641–1660.
